# Supplementary material for: Proteomic Analysis of Liver Proteins in a Rat Model of Chronic Restraint Stress-Induced Depression
Source: Hindawi journal article supplement (doi:10.1155/2017/7508316), 2017-01-01
Supplement: f1 [file 7508316.f1.zip]

---

---

---

**Supplemental information**

Supplementary Figure 1: distribution of rat liver tissue fold changes in depression rats exposed to CRS.

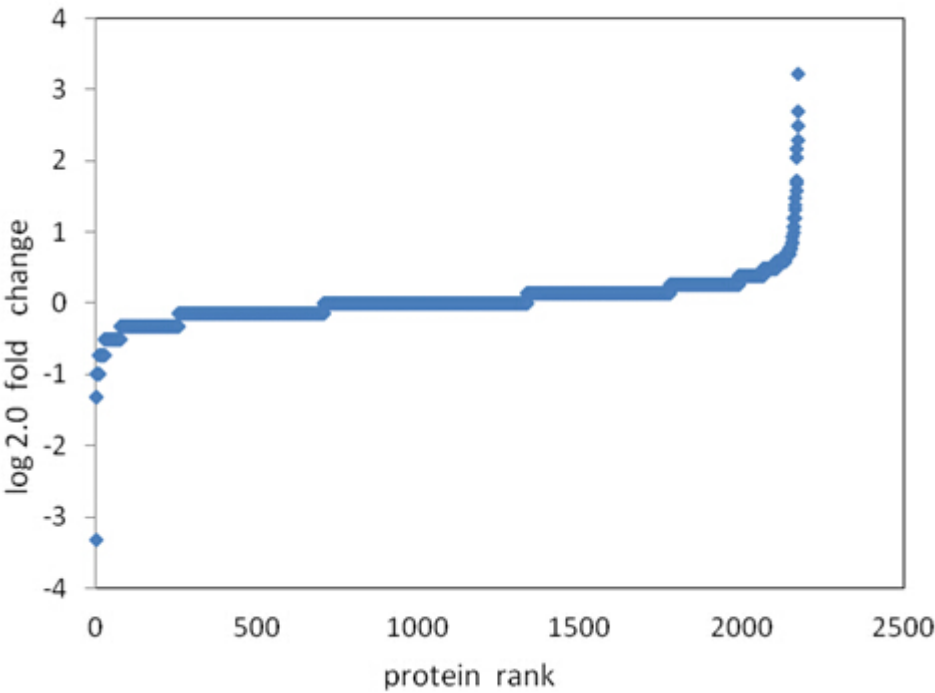

Supplementary Figure 2: Molecular networks in the livers of depression rats exposed to CRS.

Network 3 : Observation 1 : IPa-tradition medicine : Observation 1

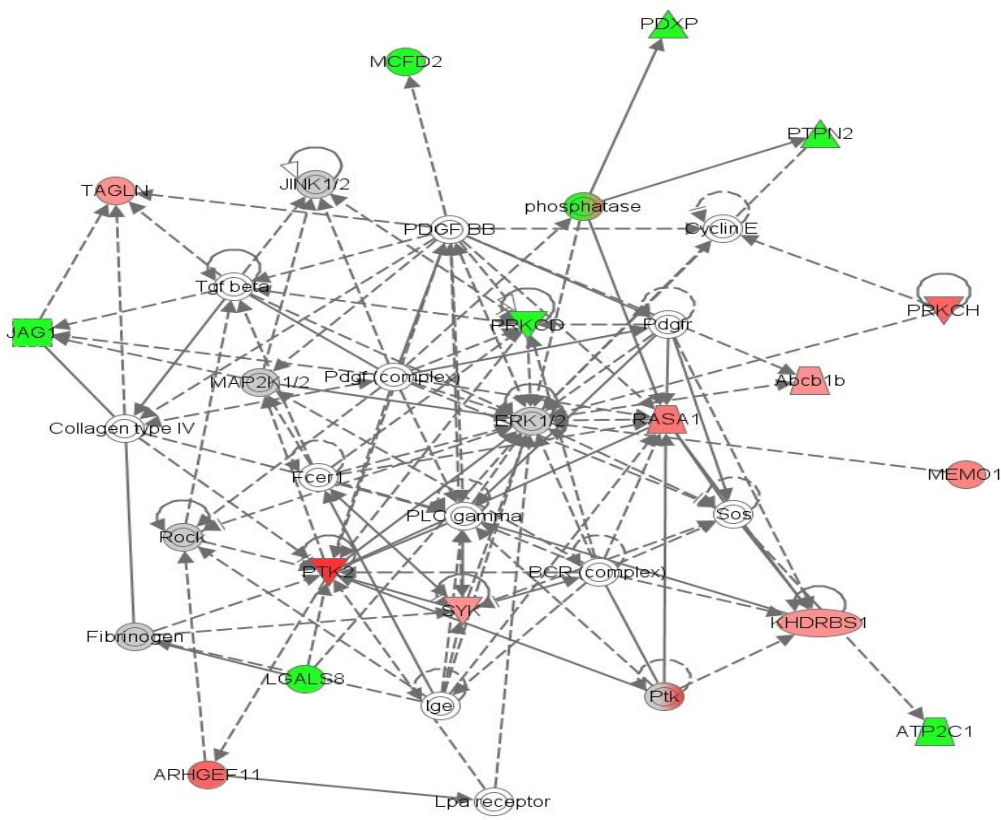

© 2000-2015 QIAGEN. All rights reserved.

Note: red icon means up-regulated proteins, green icon means down-regulated proteins, gray icon means unchanged proteins.

A—B: Chemical-protein interactions      A→B: activation, expression

.....► Indirect interaction

Supplementary Table 1: peptides quantification table in the livers of Control and depression rats due to CRS.

Supplementary Table 2: total proteins in the livers of Control and depression rats due to CRS.
