# Supplementary material for: Proteomic Analysis of Liver Proteins in a Rat Model of Chronic Restraint Stress-Induced Depression
Source: Biomed Res Int. 2017 Feb 15;2017:7508316. doi: 10.1155/2017/7508316 (PMC5331273; doi:10.1155/2017/7508316)
Supplement: Supplementary file 1 — A total of peptides and protein clusters of liver in depression rats due to chronic restraint stress were provided separately in Supplementary Table 1 and Table 2 and available online at . [file 7508316.f1.zip]

Archive with 3 entries (3 files):
- supp/Supplementary figures 7508316.v2.pdf
- supp/Supplementary Table 1 Total peptides of Liver Proteins from Rats Exposed to Chronic Restraint Stress .xlsx
- supp/Supplementary Table 2 Total proteins of Liver  from Rats Exposed to Chronic Restraint Stress.xlsx
