# Supplementary material for: Proteomic Analysis of Liver Proteins in a Rat Model of Chronic Restraint Stress-Induced Depression
Source: Biomed Res Int. 2017 Feb 15;2017:7508316. doi: 10.1155/2017/7508316 (PMC5331273; doi:10.1155/2017/7508316)
Supplement: Supplementary file 1 — A total of peptides and protein clusters of liver in depression rats due to chronic restraint stress were provided separately in Supplementary Table 1 and Table 2 and available online at . [file 7508316.f1.zip › supp/Supplementary Table 1 Total peptides of Liver Proteins from Rats Exposed to Chronic Restraint Stress .xlsx]

## Sheet: Supplementary Table 1peptides 
Proteomic Analysis of Liver Proteins in A Rat Model of Chronic Restraint Stress-Induced Depression
Cong Li,1 Zhengguang Guo,2 Ronghua Zhao,1 Wei Sun,2 Ming Xie1
Running title: Liver Proteomics of Depression Rats
1Beijing University of Chinese Medicine, Bei San Huan Dong Lu 11, Chao Yang District, Beijing 100029, China
2 Institute of Basic Medical Sciences, Academy of Medical Science, Peking Union Medical College, Dong Dan San Tiao, Dong Cheng District, Beijing 100005, China
Correspondence should be addressed to Ming Xie; xieming603@263.net
Supplementary Table 1: peptides quantification table in the livers of Control and depression rats due to CRS.
Protein Name	Accession Numbers	Sequence	Control	CRS
Carbamoyl-phosphate synthase [ammonia], mitochondrial OS=Rattus norvegicus GN=Cps1 PE=1 SV=1	sp|P07756|CPSM_RAT	aADTIGYPVMIR	-0.2247	0.1826
Carbamoyl-phosphate synthase [ammonia], mitochondrial OS=Rattus norvegicus GN=Cps1 PE=1 SV=1	sp|P07756|CPSM_RAT	aADTIGyPVMIR	-0.02343	0.1836
Carbamoyl-phosphate synthase [ammonia], mitochondrial OS=Rattus norvegicus GN=Cps1 PE=1 SV=1	sp|P07756|CPSM_RAT	aERPDGLILGMGGQTALNcGVELFk	0.3471	0.1295
Carbamoyl-phosphate synthase [ammonia], mitochondrial OS=Rattus norvegicus GN=Cps1 PE=1 SV=1	sp|P07756|CPSM_RAT	aFAISGPFNVQFLVk	-0.1382	0.1842
Carbamoyl-phosphate synthase [ammonia], mitochondrial OS=Rattus norvegicus GN=Cps1 PE=1 SV=1	sp|P07756|CPSM_RAT	aFAMTNQILVER	0.03621	0.2035
Carbamoyl-phosphate synthase [ammonia], mitochondrial OS=Rattus norvegicus GN=Cps1 PE=1 SV=1	sp|P07756|CPSM_RAT	aLENNMSLDEIVk	0.1112	0.09017
Carbamoyl-phosphate synthase [ammonia], mitochondrial OS=Rattus norvegicus GN=Cps1 PE=1 SV=1	sp|P07756|CPSM_RAT	aMkEENVk	-0.1625	0.1921
Carbamoyl-phosphate synthase [ammonia], mitochondrial OS=Rattus norvegicus GN=Cps1 PE=1 SV=1	sp|P07756|CPSM_RAT	aMLSTGFk	-0.05251	0.3115
Carbamoyl-phosphate synthase [ammonia], mitochondrial OS=Rattus norvegicus GN=Cps1 PE=1 SV=1	sp|P07756|CPSM_RAT	aMLSTGFkIPQkGILIGIQQSFRPR	-1.157	-0.1233
Carbamoyl-phosphate synthase [ammonia], mitochondrial OS=Rattus norvegicus GN=Cps1 PE=1 SV=1	sp|P07756|CPSM_RAT	aPMFSWPR	-0.1643	0.1393
Carbamoyl-phosphate synthase [ammonia], mitochondrial OS=Rattus norvegicus GN=Cps1 PE=1 SV=1	sp|P07756|CPSM_RAT	aQTAHIVLEDGTk	-0.1354	0.3506
Carbamoyl-phosphate synthase [ammonia], mitochondrial OS=Rattus norvegicus GN=Cps1 PE=1 SV=1	sp|P07756|CPSM_RAT	aTGYPLAFIAAk	-0.2565	0.1858
Carbamoyl-phosphate synthase [ammonia], mitochondrial OS=Rattus norvegicus GN=Cps1 PE=1 SV=1	sp|P07756|CPSM_RAT	cEMASTGEVAcFGEGIHTAFLk	0.1839	0.185
Carbamoyl-phosphate synthase [ammonia], mitochondrial OS=Rattus norvegicus GN=Cps1 PE=1 SV=1	sp|P07756|CPSM_RAT	cLGLTEAQTR	-0.2435	0.00504
Carbamoyl-phosphate synthase [ammonia], mitochondrial OS=Rattus norvegicus GN=Cps1 PE=1 SV=1	sp|P07756|CPSM_RAT	dADDNcVTVcNMENVDAMGVHTGDSVVVAPAQTLSNAEFQMLR	0.286	0.212
Carbamoyl-phosphate synthase [ammonia], mitochondrial OS=Rattus norvegicus GN=Cps1 PE=1 SV=1	sp|P07756|CPSM_RAT	dADPILR	-0.00408	0.089
Carbamoyl-phosphate synthase [ammonia], mitochondrial OS=Rattus norvegicus GN=Cps1 PE=1 SV=1	sp|P07756|CPSM_RAT	dELGLNk	0.0284	0.3818
Carbamoyl-phosphate synthase [ammonia], mitochondrial OS=Rattus norvegicus GN=Cps1 PE=1 SV=1	sp|P07756|CPSM_RAT	dGSIDLVINLPNNNTk	0.2135	0.07405
Carbamoyl-phosphate synthase [ammonia], mitochondrial OS=Rattus norvegicus GN=Cps1 PE=1 SV=1	sp|P07756|CPSM_RAT	dILNMDk	0.07107	0.2861
Carbamoyl-phosphate synthase [ammonia], mitochondrial OS=Rattus norvegicus GN=Cps1 PE=1 SV=1	sp|P07756|CPSM_RAT	dkGTMLGk	-0.1037	0.1831
Carbamoyl-phosphate synthase [ammonia], mitochondrial OS=Rattus norvegicus GN=Cps1 PE=1 SV=1	sp|P07756|CPSM_RAT	eIEYEVVR	0.04574	0.2026
Carbamoyl-phosphate synthase [ammonia], mitochondrial OS=Rattus norvegicus GN=Cps1 PE=1 SV=1	sp|P07756|CPSM_RAT	eIEyEVVR	-0.03975	0.01641
Carbamoyl-phosphate synthase [ammonia], mitochondrial OS=Rattus norvegicus GN=Cps1 PE=1 SV=1	sp|P07756|CPSM_RAT	eIGFSDk	-0.03499	0.1294
Carbamoyl-phosphate synthase [ammonia], mitochondrial OS=Rattus norvegicus GN=Cps1 PE=1 SV=1	sp|P07756|CPSM_RAT	eLSEPSSTR	-0.03238	0.03079
Carbamoyl-phosphate synthase [ammonia], mitochondrial OS=Rattus norvegicus GN=Cps1 PE=1 SV=1	sp|P07756|CPSM_RAT	ePLFGISTGNIITGLAAGAk	0.1258	0.2842
Carbamoyl-phosphate synthase [ammonia], mitochondrial OS=Rattus norvegicus GN=Cps1 PE=1 SV=1	sp|P07756|CPSM_RAT	eTLMDLGTk	0.1665	0.3266
Carbamoyl-phosphate synthase [ammonia], mitochondrial OS=Rattus norvegicus GN=Cps1 PE=1 SV=1	sp|P07756|CPSM_RAT	eVEMDAVGk	0.0001659	0.1847
Carbamoyl-phosphate synthase [ammonia], mitochondrial OS=Rattus norvegicus GN=Cps1 PE=1 SV=1	sp|P07756|CPSM_RAT	eVEMDAVGkEGR	0.1731	-0.1862
Carbamoyl-phosphate synthase [ammonia], mitochondrial OS=Rattus norvegicus GN=Cps1 PE=1 SV=1	sp|P07756|CPSM_RAT	eWPANLDLR	-0.127	0.1009
Carbamoyl-phosphate synthase [ammonia], mitochondrial OS=Rattus norvegicus GN=Cps1 PE=1 SV=1	sp|P07756|CPSM_RAT	eWPANLDLRk	-0.007292	-0.3974
Carbamoyl-phosphate synthase [ammonia], mitochondrial OS=Rattus norvegicus GN=Cps1 PE=1 SV=1	sp|P07756|CPSM_RAT	fDEHGIMVLGcGPYHIGSSVEFDWcAVSSIR	0.1539	0.53
Carbamoyl-phosphate synthase [ammonia], mitochondrial OS=Rattus norvegicus GN=Cps1 PE=1 SV=1	sp|P07756|CPSM_RAT	fDEHGIMVLGcGPyHIGSSVEFDWcAVSSIR	0.5383	0.204
Carbamoyl-phosphate synthase [ammonia], mitochondrial OS=Rattus norvegicus GN=Cps1 PE=1 SV=1	sp|P07756|CPSM_RAT	fHGTSSR	0.1473	0.2555
Carbamoyl-phosphate synthase [ammonia], mitochondrial OS=Rattus norvegicus GN=Cps1 PE=1 SV=1	sp|P07756|CPSM_RAT	fLEEATR	-0.137	0.05214
Carbamoyl-phosphate synthase [ammonia], mitochondrial OS=Rattus norvegicus GN=Cps1 PE=1 SV=1	sp|P07756|CPSM_RAT	fLGVAEQLHNEGFk	0.174	0.1397
Carbamoyl-phosphate synthase [ammonia], mitochondrial OS=Rattus norvegicus GN=Cps1 PE=1 SV=1	sp|P07756|CPSM_RAT	fVHDNYVIR	-0.1556	0.1754
Carbamoyl-phosphate synthase [ammonia], mitochondrial OS=Rattus norvegicus GN=Cps1 PE=1 SV=1	sp|P07756|CPSM_RAT	fVHDNyVIR	-0.1273	0.2088
Carbamoyl-phosphate synthase [ammonia], mitochondrial OS=Rattus norvegicus GN=Cps1 PE=1 SV=1	sp|P07756|CPSM_RAT	gAEVHLVPWNHDFTQMDYDGLLIAGGPGNPALAQPLIQNVk	0.1747	0.09749
Carbamoyl-phosphate synthase [ammonia], mitochondrial OS=Rattus norvegicus GN=Cps1 PE=1 SV=1	sp|P07756|CPSM_RAT	gAEVHLVPWNHDFTQMDyDGLLIAGGPGNPALAQPLIQNVk	0.358	0.07909
Carbamoyl-phosphate synthase [ammonia], mitochondrial OS=Rattus norvegicus GN=Cps1 PE=1 SV=1	sp|P07756|CPSM_RAT	gILIGIQQSFRPR	-0.259	0.05155
Carbamoyl-phosphate synthase [ammonia], mitochondrial OS=Rattus norvegicus GN=Cps1 PE=1 SV=1	sp|P07756|CPSM_RAT	gLNSESVTEETLR	0.2357	0.2413
Carbamoyl-phosphate synthase [ammonia], mitochondrial OS=Rattus norvegicus GN=Cps1 PE=1 SV=1	sp|P07756|CPSM_RAT	gNDVLVIEcNLR	-0.0263	0.1222
Carbamoyl-phosphate synthase [ammonia], mitochondrial OS=Rattus norvegicus GN=Cps1 PE=1 SV=1	sp|P07756|CPSM_RAT	gQILTMANPIIGNGGAPDTTAR	0.01829	0.2914
Carbamoyl-phosphate synthase [ammonia], mitochondrial OS=Rattus norvegicus GN=Cps1 PE=1 SV=1	sp|P07756|CPSM_RAT	gQILTMANPIIGNGGAPDTTARDELGLNk	-0.4933	0.1506
Carbamoyl-phosphate synthase [ammonia], mitochondrial OS=Rattus norvegicus GN=Cps1 PE=1 SV=1	sp|P07756|CPSM_RAT	gQNQPVLNITNR	-0.02417	0.1244
Carbamoyl-phosphate synthase [ammonia], mitochondrial OS=Rattus norvegicus GN=Cps1 PE=1 SV=1	sp|P07756|CPSM_RAT	gTTITSVLPkPALVASR	-0.4385	0.2008
Carbamoyl-phosphate synthase [ammonia], mitochondrial OS=Rattus norvegicus GN=Cps1 PE=1 SV=1	sp|P07756|CPSM_RAT	gVLkEYGVk	-0.218	-0.4346
Carbamoyl-phosphate synthase [ammonia], mitochondrial OS=Rattus norvegicus GN=Cps1 PE=1 SV=1	sp|P07756|CPSM_RAT	gySFGHPSSVAGEVVFNTGLGGYSEALTDPAYk	-0.02292	0.2887
Carbamoyl-phosphate synthase [ammonia], mitochondrial OS=Rattus norvegicus GN=Cps1 PE=1 SV=1	sp|P07756|CPSM_RAT	gySFGHPSSVAGEVVFNTGLGGySEALTDPAYk	0.2444	0.1221
Carbamoyl-phosphate synthase [ammonia], mitochondrial OS=Rattus norvegicus GN=Cps1 PE=1 SV=1	sp|P07756|CPSM_RAT	hLGIVGEcNIQFALHPTSMEYcIIEVNAR	0.4167	0.07096
Carbamoyl-phosphate synthase [ammonia], mitochondrial OS=Rattus norvegicus GN=Cps1 PE=1 SV=1	sp|P07756|CPSM_RAT	hLGIVGEcNIQFALHPTSMEycIIEVNAR	-0.1072	0.1458
Carbamoyl-phosphate synthase [ammonia], mitochondrial OS=Rattus norvegicus GN=Cps1 PE=1 SV=1	sp|P07756|CPSM_RAT	hLPTLEQPIIPSDYVAIk	-0.06163	0.1765
Carbamoyl-phosphate synthase [ammonia], mitochondrial OS=Rattus norvegicus GN=Cps1 PE=1 SV=1	sp|P07756|CPSM_RAT	hLPTLEQPIIPSDyVAIk	-0.08134	0.06947
Carbamoyl-phosphate synthase [ammonia], mitochondrial OS=Rattus norvegicus GN=Cps1 PE=1 SV=1	sp|P07756|CPSM_RAT	iALGIPLPEIk	-0.09322	0.151
Carbamoyl-phosphate synthase [ammonia], mitochondrial OS=Rattus norvegicus GN=Cps1 PE=1 SV=1	sp|P07756|CPSM_RAT	iAPSFAVESMEDALk	0.2106	0.2544
Carbamoyl-phosphate synthase [ammonia], mitochondrial OS=Rattus norvegicus GN=Cps1 PE=1 SV=1	sp|P07756|CPSM_RAT	iEFEGQSVDFVDPNk	0.4905	0.06653
Carbamoyl-phosphate synthase [ammonia], mitochondrial OS=Rattus norvegicus GN=Cps1 PE=1 SV=1	sp|P07756|CPSM_RAT	iEFEGQSVDFVDPNkQNLIAEVSTk	0.07644	0.2495
Carbamoyl-phosphate synthase [ammonia], mitochondrial OS=Rattus norvegicus GN=Cps1 PE=1 SV=1	sp|P07756|CPSM_RAT	iLDIYHQEAcNGcIISVGGQIPNNLAVPLYk	0.2353	0.2009
Carbamoyl-phosphate synthase [ammonia], mitochondrial OS=Rattus norvegicus GN=Cps1 PE=1 SV=1	sp|P07756|CPSM_RAT	iLDIYHQEAcNGcIISVGGQIPNNLAVPLyk	0.1164	0.3129
Carbamoyl-phosphate synthase [ammonia], mitochondrial OS=Rattus norvegicus GN=Cps1 PE=1 SV=1	sp|P07756|CPSM_RAT	iLESDRk	-0.02635	0.04277
Carbamoyl-phosphate synthase [ammonia], mitochondrial OS=Rattus norvegicus GN=Cps1 PE=1 SV=1	sp|P07756|CPSM_RAT	iMGTSPLQIDR	-0.1131	0.1224
Carbamoyl-phosphate synthase [ammonia], mitochondrial OS=Rattus norvegicus GN=Cps1 PE=1 SV=1	sp|P07756|CPSM_RAT	kELSEPSSTR	0.09589	0.07528
Carbamoyl-phosphate synthase [ammonia], mitochondrial OS=Rattus norvegicus GN=Cps1 PE=1 SV=1	sp|P07756|CPSM_RAT	kEPLFGISTGNIITGLAAGAk	0.009289	0.1308
Carbamoyl-phosphate synthase [ammonia], mitochondrial OS=Rattus norvegicus GN=Cps1 PE=1 SV=1	sp|P07756|CPSM_RAT	kILESDRk	-0.06454	0.2533
Carbamoyl-phosphate synthase [ammonia], mitochondrial OS=Rattus norvegicus GN=Cps1 PE=1 SV=1	sp|P07756|CPSM_RAT	kNIHPWVk	-0.171	0.1319
Carbamoyl-phosphate synthase [ammonia], mitochondrial OS=Rattus norvegicus GN=Cps1 PE=1 SV=1	sp|P07756|CPSM_RAT	kTVVVNcNPETVSTDFDEcDk	0.3931	0.211
Carbamoyl-phosphate synthase [ammonia], mitochondrial OS=Rattus norvegicus GN=Cps1 PE=1 SV=1	sp|P07756|CPSM_RAT	kTVVVNcNPETVSTDFDEcDkLYFEELSLER	-0.1502	0.1493
Carbamoyl-phosphate synthase [ammonia], mitochondrial OS=Rattus norvegicus GN=Cps1 PE=1 SV=1	sp|P07756|CPSM_RAT	kTVVVNcNPETVSTDFDEcDkLyFEELSLER	-0.03765	0.001142
Carbamoyl-phosphate synthase [ammonia], mitochondrial OS=Rattus norvegicus GN=Cps1 PE=1 SV=1	sp|P07756|CPSM_RAT	lFAEAVQk	-0.09076	0.3008
Carbamoyl-phosphate synthase [ammonia], mitochondrial OS=Rattus norvegicus GN=Cps1 PE=1 SV=1	sp|P07756|CPSM_RAT	lFATEATSDWLNANNVPATPVAWPSQEGQNPSLSSIR	0.3389	0.2463
Carbamoyl-phosphate synthase [ammonia], mitochondrial OS=Rattus norvegicus GN=Cps1 PE=1 SV=1	sp|P07756|CPSM_RAT	lNEINEk	-0.02281	0.3075
Carbamoyl-phosphate synthase [ammonia], mitochondrial OS=Rattus norvegicus GN=Cps1 PE=1 SV=1	sp|P07756|CPSM_RAT	lPMNkEWPANLDLR	-0.03063	0.3062
Carbamoyl-phosphate synthase [ammonia], mitochondrial OS=Rattus norvegicus GN=Cps1 PE=1 SV=1	sp|P07756|CPSM_RAT	lRDADPILR	-0.5671	0.1115
Carbamoyl-phosphate synthase [ammonia], mitochondrial OS=Rattus norvegicus GN=Cps1 PE=1 SV=1	sp|P07756|CPSM_RAT	lTSIDkWFLYk	-0.2635	-0.07381
Carbamoyl-phosphate synthase [ammonia], mitochondrial OS=Rattus norvegicus GN=Cps1 PE=1 SV=1	sp|P07756|CPSM_RAT	lYFEELSLER	0.459	0.0336
Carbamoyl-phosphate synthase [ammonia], mitochondrial OS=Rattus norvegicus GN=Cps1 PE=1 SV=1	sp|P07756|CPSM_RAT	lyFEELSLER	0.3484	0.2872
Carbamoyl-phosphate synthase [ammonia], mitochondrial OS=Rattus norvegicus GN=Cps1 PE=1 SV=1	sp|P07756|CPSM_RAT	mcHPSVDGFTPR	-0.01846	0.1701
Carbamoyl-phosphate synthase [ammonia], mitochondrial OS=Rattus norvegicus GN=Cps1 PE=1 SV=1	sp|P07756|CPSM_RAT	mRDILNMDk	-0.3423	0.09806
Carbamoyl-phosphate synthase [ammonia], mitochondrial OS=Rattus norvegicus GN=Cps1 PE=1 SV=1	sp|P07756|CPSM_RAT	nIHPWVk	-0.09777	0.293
Carbamoyl-phosphate synthase [ammonia], mitochondrial OS=Rattus norvegicus GN=Cps1 PE=1 SV=1	sp|P07756|CPSM_RAT	qADAVYFLPITPQFVTEVIk	-0.04525	0.02574
Carbamoyl-phosphate synthase [ammonia], mitochondrial OS=Rattus norvegicus GN=Cps1 PE=1 SV=1	sp|P07756|CPSM_RAT	qADAVyFLPITPQFVTEVIk	0.136	0.0872
Carbamoyl-phosphate synthase [ammonia], mitochondrial OS=Rattus norvegicus GN=Cps1 PE=1 SV=1	sp|P07756|CPSM_RAT	qIDTLAAEYPSVTNYLYVTYNGQEHDIk	0.4539	0.2167
Carbamoyl-phosphate synthase [ammonia], mitochondrial OS=Rattus norvegicus GN=Cps1 PE=1 SV=1	sp|P07756|CPSM_RAT	qIDTLAAEyPSVTNYLYVTYNGQEHDIk	0.4923	-0.04245
Carbamoyl-phosphate synthase [ammonia], mitochondrial OS=Rattus norvegicus GN=Cps1 PE=1 SV=1	sp|P07756|CPSM_RAT	qIDTLAAEYPSVTNyLYVTYNGQEHDIk	0.4656	0.053
Carbamoyl-phosphate synthase [ammonia], mitochondrial OS=Rattus norvegicus GN=Cps1 PE=1 SV=1	sp|P07756|CPSM_RAT	qIDTLAAEYPSVTNYLyVTYNGQEHDIk	0.3392	0.03465
Carbamoyl-phosphate synthase [ammonia], mitochondrial OS=Rattus norvegicus GN=Cps1 PE=1 SV=1	sp|P07756|CPSM_RAT	qIDTLAAEYPSVTNYLYVTyNGQEHDIk	0.3851	0.06823
Carbamoyl-phosphate synthase [ammonia], mitochondrial OS=Rattus norvegicus GN=Cps1 PE=1 SV=1	sp|P07756|CPSM_RAT	qLFSDkLNEINEk	-0.4067	0.2534
Carbamoyl-phosphate synthase [ammonia], mitochondrial OS=Rattus norvegicus GN=Cps1 PE=1 SV=1	sp|P07756|CPSM_RAT	qNLIAEVSTk	-0.01996	0.2057
Carbamoyl-phosphate synthase [ammonia], mitochondrial OS=Rattus norvegicus GN=Cps1 PE=1 SV=1	sp|P07756|CPSM_RAT	rFLEEATR	-0.0701	0.09068
Carbamoyl-phosphate synthase [ammonia], mitochondrial OS=Rattus norvegicus GN=Cps1 PE=1 SV=1	sp|P07756|CPSM_RAT	rGAEVHLVPWNHDFTQMDYDGLLIAGGPGNPALAQPLIQNVk	-0.07235	0.153
Carbamoyl-phosphate synthase [ammonia], mitochondrial OS=Rattus norvegicus GN=Cps1 PE=1 SV=1	sp|P07756|CPSM_RAT	rTAVDSGIALLTNFQVTk	0.2153	0.3619
Carbamoyl-phosphate synthase [ammonia], mitochondrial OS=Rattus norvegicus GN=Cps1 PE=1 SV=1	sp|P07756|CPSM_RAT	rTSINVVR	-0.091	0.4725
Carbamoyl-phosphate synthase [ammonia], mitochondrial OS=Rattus norvegicus GN=Cps1 PE=1 SV=1	sp|P07756|CPSM_RAT	sAYALGGLGSGIcPNk	0.04425	0.1702
Carbamoyl-phosphate synthase [ammonia], mitochondrial OS=Rattus norvegicus GN=Cps1 PE=1 SV=1	sp|P07756|CPSM_RAT	sAyALGGLGSGIcPNk	-0.02815	0.05778
Carbamoyl-phosphate synthase [ammonia], mitochondrial OS=Rattus norvegicus GN=Cps1 PE=1 SV=1	sp|P07756|CPSM_RAT	sAYALGGLGSGIcPNkETLMDLGTk	-0.1438	-0.1432
Carbamoyl-phosphate synthase [ammonia], mitochondrial OS=Rattus norvegicus GN=Cps1 PE=1 SV=1	sp|P07756|CPSM_RAT	sFPFVSk	-0.05354	0.161
Carbamoyl-phosphate synthase [ammonia], mitochondrial OS=Rattus norvegicus GN=Cps1 PE=1 SV=1	sp|P07756|CPSM_RAT	sIFSAVLDELk	0.2314	0.2386
Carbamoyl-phosphate synthase [ammonia], mitochondrial OS=Rattus norvegicus GN=Cps1 PE=1 SV=1	sp|P07756|CPSM_RAT	sLGQWLQEEk	0.1603	0.1986
Carbamoyl-phosphate synthase [ammonia], mitochondrial OS=Rattus norvegicus GN=Cps1 PE=1 SV=1	sp|P07756|CPSM_RAT	sSALASk	-0.1424	0.1943
Carbamoyl-phosphate synthase [ammonia], mitochondrial OS=Rattus norvegicus GN=Cps1 PE=1 SV=1	sp|P07756|CPSM_RAT	sVGEVMAIGR	0.02371	0.04477
Carbamoyl-phosphate synthase [ammonia], mitochondrial OS=Rattus norvegicus GN=Cps1 PE=1 SV=1	sp|P07756|CPSM_RAT	sVTGWkEIEYEVVR	0.5311	-0.8034
Carbamoyl-phosphate synthase [ammonia], mitochondrial OS=Rattus norvegicus GN=Cps1 PE=1 SV=1	sp|P07756|CPSM_RAT	tAVDSGIALLTNFQVTk	0.2259	0.3422
Carbamoyl-phosphate synthase [ammonia], mitochondrial OS=Rattus norvegicus GN=Cps1 PE=1 SV=1	sp|P07756|CPSM_RAT	tFEESFQk	0.07026	0.1169
Carbamoyl-phosphate synthase [ammonia], mitochondrial OS=Rattus norvegicus GN=Cps1 PE=1 SV=1	sp|P07756|CPSM_RAT	tLGVDFIDVATk	0.05145	0.2296
Carbamoyl-phosphate synthase [ammonia], mitochondrial OS=Rattus norvegicus GN=Cps1 PE=1 SV=1	sp|P07756|CPSM_RAT	tSAcFEPSLDYMVTk	0.3198	0.2012
Carbamoyl-phosphate synthase [ammonia], mitochondrial OS=Rattus norvegicus GN=Cps1 PE=1 SV=1	sp|P07756|CPSM_RAT	tSAcFEPSLDyMVTk	0.1004	0.1125
Carbamoyl-phosphate synthase [ammonia], mitochondrial OS=Rattus norvegicus GN=Cps1 PE=1 SV=1	sp|P07756|CPSM_RAT	tSINVVR	-0.02915	0.05347
Carbamoyl-phosphate synthase [ammonia], mitochondrial OS=Rattus norvegicus GN=Cps1 PE=1 SV=1	sp|P07756|CPSM_RAT	tVLMNPNIASVQTNEVGLk	0.009546	0.2813
Carbamoyl-phosphate synthase [ammonia], mitochondrial OS=Rattus norvegicus GN=Cps1 PE=1 SV=1	sp|P07756|CPSM_RAT	tVVVNcNPETVSTDFDEcDk	0.426	0.1082
Carbamoyl-phosphate synthase [ammonia], mitochondrial OS=Rattus norvegicus GN=Cps1 PE=1 SV=1	sp|P07756|CPSM_RAT	tVVVNcNPETVSTDFDEcDkLYFEELSLER	0.299	0.1953
Carbamoyl-phosphate synthase [ammonia], mitochondrial OS=Rattus norvegicus GN=Cps1 PE=1 SV=1	sp|P07756|CPSM_RAT	tVVVNcNPETVSTDFDEcDkLyFEELSLER	0.08928	0.1277
Carbamoyl-phosphate synthase [ammonia], mitochondrial OS=Rattus norvegicus GN=Cps1 PE=1 SV=1	sp|P07756|CPSM_RAT	vAGLLVLNYSHDYNHWLATk	0.0393	0.2162
Carbamoyl-phosphate synthase [ammonia], mitochondrial OS=Rattus norvegicus GN=Cps1 PE=1 SV=1	sp|P07756|CPSM_RAT	vAGLLVLNySHDYNHWLATk	-0.1548	0.1265
Carbamoyl-phosphate synthase [ammonia], mitochondrial OS=Rattus norvegicus GN=Cps1 PE=1 SV=1	sp|P07756|CPSM_RAT	vAGLLVLNYSHDyNHWLATk	-0.09702	0.2685
Carbamoyl-phosphate synthase [ammonia], mitochondrial OS=Rattus norvegicus GN=Cps1 PE=1 SV=1	sp|P07756|CPSM_RAT	vAGLLVLNySHDyNHWLATk	0.2829	0.2388
Carbamoyl-phosphate synthase [ammonia], mitochondrial OS=Rattus norvegicus GN=Cps1 PE=1 SV=1	sp|P07756|CPSM_RAT	vAQAPWk	-0.05786	0.2503
Carbamoyl-phosphate synthase [ammonia], mitochondrial OS=Rattus norvegicus GN=Cps1 PE=1 SV=1	sp|P07756|CPSM_RAT	vISHAISEHVEDAGVHSGDATLMLPTQTISQGAIEk	0.3096	0.09628
Carbamoyl-phosphate synthase [ammonia], mitochondrial OS=Rattus norvegicus GN=Cps1 PE=1 SV=1	sp|P07756|CPSM_RAT	vLGTSVESIMATEDR	0.291	0.09775
Carbamoyl-phosphate synthase [ammonia], mitochondrial OS=Rattus norvegicus GN=Cps1 PE=1 SV=1	sp|P07756|CPSM_RAT	vLILGSGGLSIGQAGEFDYSGSQAVk	0.2548	0.2716
Carbamoyl-phosphate synthase [ammonia], mitochondrial OS=Rattus norvegicus GN=Cps1 PE=1 SV=1	sp|P07756|CPSM_RAT	vLILGSGGLSIGQAGEFDySGSQAVk	0.3107	0.1792
Carbamoyl-phosphate synthase [ammonia], mitochondrial OS=Rattus norvegicus GN=Cps1 PE=1 SV=1	sp|P07756|CPSM_RAT	vMIGESVDEk	0.1279	0.2311
Carbamoyl-phosphate synthase [ammonia], mitochondrial OS=Rattus norvegicus GN=Cps1 PE=1 SV=1	sp|P07756|CPSM_RAT	vPAIYGVDTR	-0.1745	0.09363
Carbamoyl-phosphate synthase [ammonia], mitochondrial OS=Rattus norvegicus GN=Cps1 PE=1 SV=1	sp|P07756|CPSM_RAT	vPAIyGVDTR	-0.2237	0.3879
Carbamoyl-phosphate synthase [ammonia], mitochondrial OS=Rattus norvegicus GN=Cps1 PE=1 SV=1	sp|P07756|CPSM_RAT	vSQEHPVVLTk	-0.1127	0.2938
Carbamoyl-phosphate synthase [ammonia], mitochondrial OS=Rattus norvegicus GN=Cps1 PE=1 SV=1	sp|P07756|CPSM_RAT	vVAVDcGIk	-0.175	0.1991
Carbamoyl-phosphate synthase [ammonia], mitochondrial OS=Rattus norvegicus GN=Cps1 PE=1 SV=1	sp|P07756|CPSM_RAT	vVAVDcGIkNNVIR	-0.001251	0.1544
Carbamoyl-phosphate synthase [ammonia], mitochondrial OS=Rattus norvegicus GN=Cps1 PE=1 SV=1	sp|P07756|CPSM_RAT	yMESDGIk	0.15	0.2761
Carbamoyl-phosphate synthase [ammonia], mitochondrial OS=Rattus norvegicus GN=Cps1 PE=1 SV=1	sp|P07756|CPSM_RAT	yMESDGIk	0.229	0.3879
60 kDa heat shock protein, mitochondrial OS=Rattus norvegicus GN=Hspd1 PE=1 SV=1	sp|P63039|CH60_RAT	aAVEEGIVLGGGcALLR	0.03242	-0.1047
60 kDa heat shock protein, mitochondrial OS=Rattus norvegicus GN=Hspd1 PE=1 SV=1	sp|P63039|CH60_RAT	aLMLQGVDLLADAVAVTMGPk	0.008087	0.04766
60 kDa heat shock protein, mitochondrial OS=Rattus norvegicus GN=Hspd1 PE=1 SV=1	sp|P63039|CH60_RAT	aPGFGDNR	-0.09497	0.007922
60 kDa heat shock protein, mitochondrial OS=Rattus norvegicus GN=Hspd1 PE=1 SV=1	sp|P63039|CH60_RAT	cEFQDAYVLLSEk	0.02503	0.07254
60 kDa heat shock protein, mitochondrial OS=Rattus norvegicus GN=Hspd1 PE=1 SV=1	sp|P63039|CH60_RAT	cEFQDAyVLLSEk	-0.03708	0.04414
60 kDa heat shock protein, mitochondrial OS=Rattus norvegicus GN=Hspd1 PE=1 SV=1	sp|P63039|CH60_RAT	cEFQDAYVLLSEkk	-0.4231	-0.3419
60 kDa heat shock protein, mitochondrial OS=Rattus norvegicus GN=Hspd1 PE=1 SV=1	sp|P63039|CH60_RAT	cIPALDSLkPANEDQk	-0.03274	0.004081
60 kDa heat shock protein, mitochondrial OS=Rattus norvegicus GN=Hspd1 PE=1 SV=1	sp|P63039|CH60_RAT	dDAMLLk	-0.06337	0.1272
60 kDa heat shock protein, mitochondrial OS=Rattus norvegicus GN=Hspd1 PE=1 SV=1	sp|P63039|CH60_RAT	dGVTVAk	-0.1136	0.01748
60 kDa heat shock protein, mitochondrial OS=Rattus norvegicus GN=Hspd1 PE=1 SV=1	sp|P63039|CH60_RAT	dIGNIISDAMk	0.2572	-0.1605
60 kDa heat shock protein, mitochondrial OS=Rattus norvegicus GN=Hspd1 PE=1 SV=1	sp|P63039|CH60_RAT	dMAIATGGAVFGEEGLNLNLEDVQAHDLGk	0.1286	-0.03209
60 kDa heat shock protein, mitochondrial OS=Rattus norvegicus GN=Hspd1 PE=1 SV=1	sp|P63039|CH60_RAT	dPGMGAMGGMGGGMGGGMF	0.7731	-0.01732
60 kDa heat shock protein, mitochondrial OS=Rattus norvegicus GN=Hspd1 PE=1 SV=1	sp|P63039|CH60_RAT	dRVTDALNATR	0.09876	0.04862
60 kDa heat shock protein, mitochondrial OS=Rattus norvegicus GN=Hspd1 PE=1 SV=1	sp|P63039|CH60_RAT	eEkDPGMGAMGGMGGGMGGGMF	0.6316	0.1034
60 kDa heat shock protein, mitochondrial OS=Rattus norvegicus GN=Hspd1 PE=1 SV=1	sp|P63039|CH60_RAT	gANPVEIR	-0.2358	-0.1076
60 kDa heat shock protein, mitochondrial OS=Rattus norvegicus GN=Hspd1 PE=1 SV=1	sp|P63039|CH60_RAT	gIIDPTk	-0.145	-0.1023
60 kDa heat shock protein, mitochondrial OS=Rattus norvegicus GN=Hspd1 PE=1 SV=1	sp|P63039|CH60_RAT	gVMLAVDAVIAELk	0.07615	0.04923
60 kDa heat shock protein, mitochondrial OS=Rattus norvegicus GN=Hspd1 PE=1 SV=1	sp|P63039|CH60_RAT	gVMLAVDAVIAELkk	-0.07332	0.1408
60 kDa heat shock protein, mitochondrial OS=Rattus norvegicus GN=Hspd1 PE=1 SV=1	sp|P63039|CH60_RAT	gYISPYFINTSk	-0.1416	0.2841
60 kDa heat shock protein, mitochondrial OS=Rattus norvegicus GN=Hspd1 PE=1 SV=1	sp|P63039|CH60_RAT	iGIEIIk	-0.3269	0.1996
60 kDa heat shock protein, mitochondrial OS=Rattus norvegicus GN=Hspd1 PE=1 SV=1	sp|P63039|CH60_RAT	iGIEIIkR	-0.1954	-0.04315
60 kDa heat shock protein, mitochondrial OS=Rattus norvegicus GN=Hspd1 PE=1 SV=1	sp|P63039|CH60_RAT	iLQSSSEVGYDAMLGDFVNMVEk	0.3456	0.5414
60 kDa heat shock protein, mitochondrial OS=Rattus norvegicus GN=Hspd1 PE=1 SV=1	sp|P63039|CH60_RAT	iLQSSSEVGyDAMLGDFVNMVEk	0.3241	0.4118
60 kDa heat shock protein, mitochondrial OS=Rattus norvegicus GN=Hspd1 PE=1 SV=1	sp|P63039|CH60_RAT	iPAMTIAk	-0.1773	0.1623
60 kDa heat shock protein, mitochondrial OS=Rattus norvegicus GN=Hspd1 PE=1 SV=1	sp|P63039|CH60_RAT	iQEITEQLDITTSEYEk	0.3265	0.06833
60 kDa heat shock protein, mitochondrial OS=Rattus norvegicus GN=Hspd1 PE=1 SV=1	sp|P63039|CH60_RAT	iQEITEQLDITTSEyEk	0.26	0.04497
60 kDa heat shock protein, mitochondrial OS=Rattus norvegicus GN=Hspd1 PE=1 SV=1	sp|P63039|CH60_RAT	iQEITEQLDITTSEYEkEk	-0.2	0.1841
60 kDa heat shock protein, mitochondrial OS=Rattus norvegicus GN=Hspd1 PE=1 SV=1	sp|P63039|CH60_RAT	iQEITEQLDITTSEyEkEk	-0.1778	-0.1105
60 kDa heat shock protein, mitochondrial OS=Rattus norvegicus GN=Hspd1 PE=1 SV=1	sp|P63039|CH60_RAT	iSSVQSIVPALEIANAHR	0.05858	0.1423
60 kDa heat shock protein, mitochondrial OS=Rattus norvegicus GN=Hspd1 PE=1 SV=1	sp|P63039|CH60_RAT	kGVITVk	-0.08625	-0.08542
60 kDa heat shock protein, mitochondrial OS=Rattus norvegicus GN=Hspd1 PE=1 SV=1	sp|P63039|CH60_RAT	kPLVIIAEDVDGEALSTLVLNR	0.1305	0.1083
60 kDa heat shock protein, mitochondrial OS=Rattus norvegicus GN=Hspd1 PE=1 SV=1	sp|P63039|CH60_RAT	lSDGVAVLk	-0.05461	-0.005
60 kDa heat shock protein, mitochondrial OS=Rattus norvegicus GN=Hspd1 PE=1 SV=1	sp|P63039|CH60_RAT	lVQDVANNTNEEAGDGTTTATVLAR	0.03726	0.1357
60 kDa heat shock protein, mitochondrial OS=Rattus norvegicus GN=Hspd1 PE=1 SV=1	sp|P63039|CH60_RAT	nAGVEGSLIVEk	0.0191	0.2941
60 kDa heat shock protein, mitochondrial OS=Rattus norvegicus GN=Hspd1 PE=1 SV=1	sp|P63039|CH60_RAT	qSkPVTTPEEIAQVATISANGDk	0.2308	-0.1168
60 kDa heat shock protein, mitochondrial OS=Rattus norvegicus GN=Hspd1 PE=1 SV=1	sp|P63039|CH60_RAT	qSkPVTTPEEIAQVATISANGDkDIGNIISDAMk	0.2353	0.04134
60 kDa heat shock protein, mitochondrial OS=Rattus norvegicus GN=Hspd1 PE=1 SV=1	sp|P63039|CH60_RAT	rGVMLAVDAVIAELk	0.7079	0.2784
60 kDa heat shock protein, mitochondrial OS=Rattus norvegicus GN=Hspd1 PE=1 SV=1	sp|P63039|CH60_RAT	rIQEITEQLDITTSEYEk	0.2919	0.009745
60 kDa heat shock protein, mitochondrial OS=Rattus norvegicus GN=Hspd1 PE=1 SV=1	sp|P63039|CH60_RAT	tALLDAAGVASLLTTAEAVVTEIPk	0.09436	0.2598
60 kDa heat shock protein, mitochondrial OS=Rattus norvegicus GN=Hspd1 PE=1 SV=1	sp|P63039|CH60_RAT	tALLDAAGVASLLTTAEAVVTEIPkEEk	0.1921	0.2663
60 kDa heat shock protein, mitochondrial OS=Rattus norvegicus GN=Hspd1 PE=1 SV=1	sp|P63039|CH60_RAT	tLNDELEIIEGMk	0.2172	0.1155
60 kDa heat shock protein, mitochondrial OS=Rattus norvegicus GN=Hspd1 PE=1 SV=1	sp|P63039|CH60_RAT	tLNDELEIIEGMkFDR	0.1298	-0.2577
60 kDa heat shock protein, mitochondrial OS=Rattus norvegicus GN=Hspd1 PE=1 SV=1	sp|P63039|CH60_RAT	tVIIEQSWGSPk	0.04783	0.08602
60 kDa heat shock protein, mitochondrial OS=Rattus norvegicus GN=Hspd1 PE=1 SV=1	sp|P63039|CH60_RAT	vGEVIVTk	-0.1906	0.01592
60 kDa heat shock protein, mitochondrial OS=Rattus norvegicus GN=Hspd1 PE=1 SV=1	sp|P63039|CH60_RAT	vGEVIVTkDDAMLLk	-0.5589	-0.1223
60 kDa heat shock protein, mitochondrial OS=Rattus norvegicus GN=Hspd1 PE=1 SV=1	sp|P63039|CH60_RAT	vGGTSDVEVNEk	0.1036	0.1627
60 kDa heat shock protein, mitochondrial OS=Rattus norvegicus GN=Hspd1 PE=1 SV=1	sp|P63039|CH60_RAT	vGGTSDVEVNEkk	-0.3049	0.3112
60 kDa heat shock protein, mitochondrial OS=Rattus norvegicus GN=Hspd1 PE=1 SV=1	sp|P63039|CH60_RAT	vGLQVVAVk	-0.1057	-0.02195
60 kDa heat shock protein, mitochondrial OS=Rattus norvegicus GN=Hspd1 PE=1 SV=1	sp|P63039|CH60_RAT	vTDALNATR	-0.07662	-0.05366
Glutamate dehydrogenase 1, mitochondrial OS=Rattus norvegicus GN=Glud1 PE=1 SV=2	sp|P10860|DHE3_RAT	aLASLMTYk	-0.01704	0.08613
Glutamate dehydrogenase 1, mitochondrial OS=Rattus norvegicus GN=Glud1 PE=1 SV=2	sp|P10860|DHE3_RAT	aLASLMTyk	-0.1214	0.1821
Glutamate dehydrogenase 1, mitochondrial OS=Rattus norvegicus GN=Glud1 PE=1 SV=2	sp|P10860|DHE3_RAT	aQHSQHR	0.9873	0.3403
Glutamate dehydrogenase 1, mitochondrial OS=Rattus norvegicus GN=Glud1 PE=1 SV=2	sp|P10860|DHE3_RAT	cAVVDVPFGGAk	-0.2399	0.2023
Glutamate dehydrogenase 1, mitochondrial OS=Rattus norvegicus GN=Glud1 PE=1 SV=2	sp|P10860|DHE3_RAT	cVGVGESDGSIWNPDGIDPk	0.1139	0.07277
Glutamate dehydrogenase 1, mitochondrial OS=Rattus norvegicus GN=Glud1 PE=1 SV=2	sp|P10860|DHE3_RAT	dDGSWEVIEGYR	0.3447	-0.05927
Glutamate dehydrogenase 1, mitochondrial OS=Rattus norvegicus GN=Glud1 PE=1 SV=2	sp|P10860|DHE3_RAT	dDGSWEVIEGyR	0.4581	-0.04525
Glutamate dehydrogenase 1, mitochondrial OS=Rattus norvegicus GN=Glud1 PE=1 SV=2	sp|P10860|DHE3_RAT	dDGSWEVIEGyRAQHSQHR	-0.6319	0.2154
Glutamate dehydrogenase 1, mitochondrial OS=Rattus norvegicus GN=Glud1 PE=1 SV=2	sp|P10860|DHE3_RAT	dIVHSGLAYTMER	0.09402	0.0571
Glutamate dehydrogenase 1, mitochondrial OS=Rattus norvegicus GN=Glud1 PE=1 SV=2	sp|P10860|DHE3_RAT	dIVHSGLAyTMER	-0.08672	0.009152
Glutamate dehydrogenase 1, mitochondrial OS=Rattus norvegicus GN=Glud1 PE=1 SV=2	sp|P10860|DHE3_RAT	dSNYHLLMSVQESLER	0.1209	0.1092
Glutamate dehydrogenase 1, mitochondrial OS=Rattus norvegicus GN=Glud1 PE=1 SV=2	sp|P10860|DHE3_RAT	dSNyHLLMSVQESLER	0.001783	-0.002984
Glutamate dehydrogenase 1, mitochondrial OS=Rattus norvegicus GN=Glud1 PE=1 SV=2	sp|P10860|DHE3_RAT	eDDPNFFk	0.1922	-0.0745
Glutamate dehydrogenase 1, mitochondrial OS=Rattus norvegicus GN=Glud1 PE=1 SV=2	sp|P10860|DHE3_RAT	eNEEQkR	0.2813	1.238
Glutamate dehydrogenase 1, mitochondrial OS=Rattus norvegicus GN=Glud1 PE=1 SV=2	sp|P10860|DHE3_RAT	fTMELAk	-0.1822	0.1372
Glutamate dehydrogenase 1, mitochondrial OS=Rattus norvegicus GN=Glud1 PE=1 SV=2	sp|P10860|DHE3_RAT	gASIVEDk	-0.07306	0.1484
Glutamate dehydrogenase 1, mitochondrial OS=Rattus norvegicus GN=Glud1 PE=1 SV=2	sp|P10860|DHE3_RAT	gFIGPGIDVPAPDMSTGER	-0.1508	0.09994
Glutamate dehydrogenase 1, mitochondrial OS=Rattus norvegicus GN=Glud1 PE=1 SV=2	sp|P10860|DHE3_RAT	gVFHGIENFINEASYMSILGMTPGLGDk	0.3818	0.3891
Glutamate dehydrogenase 1, mitochondrial OS=Rattus norvegicus GN=Glud1 PE=1 SV=2	sp|P10860|DHE3_RAT	gVFHGIENFINEASyMSILGMTPGLGDk	0.3344	0.05922
Glutamate dehydrogenase 1, mitochondrial OS=Rattus norvegicus GN=Glud1 PE=1 SV=2	sp|P10860|DHE3_RAT	hGGTIPVVPTAEFQDR	-0.007708	0.04199
Glutamate dehydrogenase 1, mitochondrial OS=Rattus norvegicus GN=Glud1 PE=1 SV=2	sp|P10860|DHE3_RAT	iIAEGANGPTTPEADk	0.1114	0.06666
Glutamate dehydrogenase 1, mitochondrial OS=Rattus norvegicus GN=Glud1 PE=1 SV=2	sp|P10860|DHE3_RAT	iIAEGANGPTTPEADkIFLER	-0.1865	0.1312
Glutamate dehydrogenase 1, mitochondrial OS=Rattus norvegicus GN=Glud1 PE=1 SV=2	sp|P10860|DHE3_RAT	iIkPcNHVLSLSFPIR	-0.3289	0.04178
Glutamate dehydrogenase 1, mitochondrial OS=Rattus norvegicus GN=Glud1 PE=1 SV=2	sp|P10860|DHE3_RAT	iSGASEk	-0.04361	0.1502
Glutamate dehydrogenase 1, mitochondrial OS=Rattus norvegicus GN=Glud1 PE=1 SV=2	sp|P10860|DHE3_RAT	iSGASEkDIVHSGLAYTMER	-0.2704	-0.213
Glutamate dehydrogenase 1, mitochondrial OS=Rattus norvegicus GN=Glud1 PE=1 SV=2	sp|P10860|DHE3_RAT	kGFIGPGIDVPAPDMSTGER	-0.1037	0.07782
Glutamate dehydrogenase 1, mitochondrial OS=Rattus norvegicus GN=Glud1 PE=1 SV=2	sp|P10860|DHE3_RAT	lQHGSILGFPk	-0.1525	0.2896
Glutamate dehydrogenase 1, mitochondrial OS=Rattus norvegicus GN=Glud1 PE=1 SV=2	sp|P10860|DHE3_RAT	mVEGFFDR	-0.1732	0.003386
Glutamate dehydrogenase 1, mitochondrial OS=Rattus norvegicus GN=Glud1 PE=1 SV=2	sp|P10860|DHE3_RAT	nLNHVSYGR	-0.1372	-0.0583
Glutamate dehydrogenase 1, mitochondrial OS=Rattus norvegicus GN=Glud1 PE=1 SV=2	sp|P10860|DHE3_RAT	nLNHVSyGR	0.07128	-0.02875
Glutamate dehydrogenase 1, mitochondrial OS=Rattus norvegicus GN=Glud1 PE=1 SV=2	sp|P10860|DHE3_RAT	nYTDNELEk	0.03444	0.06169
Glutamate dehydrogenase 1, mitochondrial OS=Rattus norvegicus GN=Glud1 PE=1 SV=2	sp|P10860|DHE3_RAT	nyTDNELEk	0.06166	0.1473
Glutamate dehydrogenase 1, mitochondrial OS=Rattus norvegicus GN=Glud1 PE=1 SV=2	sp|P10860|DHE3_RAT	rDDGSWEVIEGYR	0.3312	-0.1989
Glutamate dehydrogenase 1, mitochondrial OS=Rattus norvegicus GN=Glud1 PE=1 SV=2	sp|P10860|DHE3_RAT	rDDGSWEVIEGyR	0.3089	0.04414
Glutamate dehydrogenase 1, mitochondrial OS=Rattus norvegicus GN=Glud1 PE=1 SV=2	sp|P10860|DHE3_RAT	rFTMELAk	-0.1013	0.03503
Glutamate dehydrogenase 1, mitochondrial OS=Rattus norvegicus GN=Glud1 PE=1 SV=2	sp|P10860|DHE3_RAT	tAAYVNAIEk	0.08754	0.126
Glutamate dehydrogenase 1, mitochondrial OS=Rattus norvegicus GN=Glud1 PE=1 SV=2	sp|P10860|DHE3_RAT	tAAyVNAIEk	-0.1441	0.009688
Glutamate dehydrogenase 1, mitochondrial OS=Rattus norvegicus GN=Glud1 PE=1 SV=2	sp|P10860|DHE3_RAT	tFVVQGFGNVGLHSMR	-0.04385	0.23
Glutamate dehydrogenase 1, mitochondrial OS=Rattus norvegicus GN=Glud1 PE=1 SV=2	sp|P10860|DHE3_RAT	vYEGSILEADcDILIPAASEk	0.2881	0.1094
Glutamate dehydrogenase 1, mitochondrial OS=Rattus norvegicus GN=Glud1 PE=1 SV=2	sp|P10860|DHE3_RAT	vyEGSILEADcDILIPAASEk	0.06912	-0.07261
Glutamate dehydrogenase 1, mitochondrial OS=Rattus norvegicus GN=Glud1 PE=1 SV=2	sp|P10860|DHE3_RAT	vYNEAGVTFT	0.06784	0.06854
Glutamate dehydrogenase 1, mitochondrial OS=Rattus norvegicus GN=Glud1 PE=1 SV=2	sp|P10860|DHE3_RAT	yNLGLDLR	-0.1697	0.0986
Glutamate dehydrogenase 1, mitochondrial OS=Rattus norvegicus GN=Glud1 PE=1 SV=2	sp|P10860|DHE3_RAT	ySTDVSVDEVk	0.003995	0.09513
Glutamate dehydrogenase 1, mitochondrial OS=Rattus norvegicus GN=Glud1 PE=1 SV=2	sp|P10860|DHE3_RAT	ySTDVSVDEVk	-0.1322	0.02828
ATP synthase subunit alpha, mitochondrial OS=Rattus norvegicus GN=Atp5a1 PE=1 SV=2	sp|P15999|ATPA_RAT	aPGIIPR	-0.3607	0.2168
ATP synthase subunit alpha, mitochondrial OS=Rattus norvegicus GN=Atp5a1 PE=1 SV=2	sp|P15999|ATPA_RAT	aVDSLVPIGR	-0.175	-0.2197
ATP synthase subunit alpha, mitochondrial OS=Rattus norvegicus GN=Atp5a1 PE=1 SV=2	sp|P15999|ATPA_RAT	eAYPGDVFYLHSR	0.04069	-0.1997
ATP synthase subunit alpha, mitochondrial OS=Rattus norvegicus GN=Atp5a1 PE=1 SV=2	sp|P15999|ATPA_RAT	eAyPGDVFYLHSR	0.04064	-0.07224
ATP synthase subunit alpha, mitochondrial OS=Rattus norvegicus GN=Atp5a1 PE=1 SV=2	sp|P15999|ATPA_RAT	eAYPGDVFyLHSR	0.1092	-0.09587
ATP synthase subunit alpha, mitochondrial OS=Rattus norvegicus GN=Atp5a1 PE=1 SV=2	sp|P15999|ATPA_RAT	eGDIVkR	-0.2262	-0.1057
ATP synthase subunit alpha, mitochondrial OS=Rattus norvegicus GN=Atp5a1 PE=1 SV=2	sp|P15999|ATPA_RAT	eIVTNFLAGFEP	0.1892	-0.05552
ATP synthase subunit alpha, mitochondrial OS=Rattus norvegicus GN=Atp5a1 PE=1 SV=2	sp|P15999|ATPA_RAT	eLIIGDR	-0.01933	-0.2871
ATP synthase subunit alpha, mitochondrial OS=Rattus norvegicus GN=Atp5a1 PE=1 SV=2	sp|P15999|ATPA_RAT	ePMQTGIk	0.06599	-0.0953
ATP synthase subunit alpha, mitochondrial OS=Rattus norvegicus GN=Atp5a1 PE=1 SV=2	sp|P15999|ATPA_RAT	eVAAFAQFGSDLDAATQQLLSR	0.01776	-0.1618
ATP synthase subunit alpha, mitochondrial OS=Rattus norvegicus GN=Atp5a1 PE=1 SV=2	sp|P15999|ATPA_RAT	fESAFLSHVVSQHQSLLGNIR	-0.07759	0.00724
ATP synthase subunit alpha, mitochondrial OS=Rattus norvegicus GN=Atp5a1 PE=1 SV=2	sp|P15999|ATPA_RAT	fNDGTDEk	0.2205	-0.03106
ATP synthase subunit alpha, mitochondrial OS=Rattus norvegicus GN=Atp5a1 PE=1 SV=2	sp|P15999|ATPA_RAT	fNDGTDEkk	0.1108	-0.2772
ATP synthase subunit alpha, mitochondrial OS=Rattus norvegicus GN=Atp5a1 PE=1 SV=2	sp|P15999|ATPA_RAT	gIRPAINVGLSVSR	-0.4834	-0.2526
ATP synthase subunit alpha, mitochondrial OS=Rattus norvegicus GN=Atp5a1 PE=1 SV=2	sp|P15999|ATPA_RAT	gMSLNLEPDNVGVVVFGNDk	0.2309	-0.1175
ATP synthase subunit alpha, mitochondrial OS=Rattus norvegicus GN=Atp5a1 PE=1 SV=2	sp|P15999|ATPA_RAT	gYLDkLEPSk	-0.1721	-0.1402
ATP synthase subunit alpha, mitochondrial OS=Rattus norvegicus GN=Atp5a1 PE=1 SV=2	sp|P15999|ATPA_RAT	hALIIYDDLSk	0.1179	-0.07455
ATP synthase subunit alpha, mitochondrial OS=Rattus norvegicus GN=Atp5a1 PE=1 SV=2	sp|P15999|ATPA_RAT	hALIIyDDLSk	-0.02173	-0.08527
ATP synthase subunit alpha, mitochondrial OS=Rattus norvegicus GN=Atp5a1 PE=1 SV=2	sp|P15999|ATPA_RAT	iLGADTSVDLEETGR	0.03815	-0.2008
ATP synthase subunit alpha, mitochondrial OS=Rattus norvegicus GN=Atp5a1 PE=1 SV=2	sp|P15999|ATPA_RAT	iSEQSDAk	0.7145	-0.1153
ATP synthase subunit alpha, mitochondrial OS=Rattus norvegicus GN=Atp5a1 PE=1 SV=2	sp|P15999|ATPA_RAT	lELAQYR	-0.003707	-0.2051
ATP synthase subunit alpha, mitochondrial OS=Rattus norvegicus GN=Atp5a1 PE=1 SV=2	sp|P15999|ATPA_RAT	lELAQyR	-0.2646	0.01023
ATP synthase subunit alpha, mitochondrial OS=Rattus norvegicus GN=Atp5a1 PE=1 SV=2	sp|P15999|ATPA_RAT	lkEIVTNFLAGFEP	-0.04998	-0.3842
ATP synthase subunit alpha, mitochondrial OS=Rattus norvegicus GN=Atp5a1 PE=1 SV=2	sp|P15999|ATPA_RAT	lTDADAMk	0.003718	0.03465
ATP synthase subunit alpha, mitochondrial OS=Rattus norvegicus GN=Atp5a1 PE=1 SV=2	sp|P15999|ATPA_RAT	lYcIYVAIGQk	0.0002728	0.0794
ATP synthase subunit alpha, mitochondrial OS=Rattus norvegicus GN=Atp5a1 PE=1 SV=2	sp|P15999|ATPA_RAT	nVQAEEMVEFSSGLk	0.3452	-0.03516
ATP synthase subunit alpha, mitochondrial OS=Rattus norvegicus GN=Atp5a1 PE=1 SV=2	sp|P15999|ATPA_RAT	qGQYSPMAIEEQVAVIYAGVR	-0.06894	0.02945
ATP synthase subunit alpha, mitochondrial OS=Rattus norvegicus GN=Atp5a1 PE=1 SV=2	sp|P15999|ATPA_RAT	qMSLLLR	-0.1886	-0.09822
ATP synthase subunit alpha, mitochondrial OS=Rattus norvegicus GN=Atp5a1 PE=1 SV=2	sp|P15999|ATPA_RAT	qVAGTMk	0.04688	-0.1928
ATP synthase subunit alpha, mitochondrial OS=Rattus norvegicus GN=Atp5a1 PE=1 SV=2	sp|P15999|ATPA_RAT	rFNDGTDEk	0.2484	-0.124
ATP synthase subunit alpha, mitochondrial OS=Rattus norvegicus GN=Atp5a1 PE=1 SV=2	sp|P15999|ATPA_RAT	rLTDADAMk	0.1705	0.02106
ATP synthase subunit alpha, mitochondrial OS=Rattus norvegicus GN=Atp5a1 PE=1 SV=2	sp|P15999|ATPA_RAT	rSTVAQLVk	-0.157	0.1777
ATP synthase subunit alpha, mitochondrial OS=Rattus norvegicus GN=Atp5a1 PE=1 SV=2	sp|P15999|ATPA_RAT	rTGAIVDVPVGDELLGR	-0.2723	0.1559
ATP synthase subunit alpha, mitochondrial OS=Rattus norvegicus GN=Atp5a1 PE=1 SV=2	sp|P15999|ATPA_RAT	sTVAQLVk	-0.09432	-0.08613
ATP synthase subunit alpha, mitochondrial OS=Rattus norvegicus GN=Atp5a1 PE=1 SV=2	sp|P15999|ATPA_RAT	tGAIVDVPVGDELLGR	-0.04113	-0.1893
ATP synthase subunit alpha, mitochondrial OS=Rattus norvegicus GN=Atp5a1 PE=1 SV=2	sp|P15999|ATPA_RAT	tGTAEMSSILEER	-0.1689	-0.2314
ATP synthase subunit alpha, mitochondrial OS=Rattus norvegicus GN=Atp5a1 PE=1 SV=2	sp|P15999|ATPA_RAT	tSIAIDTIINQk	0.00129	-0.07914
ATP synthase subunit alpha, mitochondrial OS=Rattus norvegicus GN=Atp5a1 PE=1 SV=2	sp|P15999|ATPA_RAT	vGSAAQTR	-0.003236	-0.3536
ATP synthase subunit alpha, mitochondrial OS=Rattus norvegicus GN=Atp5a1 PE=1 SV=2	sp|P15999|ATPA_RAT	vLSIGDGIAR	-0.1616	0.02131
ATP synthase subunit alpha, mitochondrial OS=Rattus norvegicus GN=Atp5a1 PE=1 SV=2	sp|P15999|ATPA_RAT	vVDALGNAIDGk	0.0007753	-0.1312
Catalase OS=Rattus norvegicus GN=Cat PE=1 SV=3	sp|P04762|CATA_RAT	aPQkPDVLTTGGGNPIGDk	-0.0812	0.1222
Catalase OS=Rattus norvegicus GN=Cat PE=1 SV=3	sp|P04762|CATA_RAT	dAMLFPSFIHSQk	0.01901	0.01208
Catalase OS=Rattus norvegicus GN=Cat PE=1 SV=3	sp|P04762|CATA_RAT	dAQLFIQR	-0.1223	-0.03794
Catalase OS=Rattus norvegicus GN=Cat PE=1 SV=3	sp|P04762|CATA_RAT	dGPMcMHDNQGGAPNYYPNSFSAPEQQGSALEHHSQcSADVk	0.334	0.08333
Catalase OS=Rattus norvegicus GN=Cat PE=1 SV=3	sp|P04762|CATA_RAT	dGPMcMHDNQGGAPNYyPNSFSAPEQQGSALEHHSQcSADVk	0.5032	0.06961
Catalase OS=Rattus norvegicus GN=Cat PE=1 SV=3	sp|P04762|CATA_RAT	dGPMcMHDNQGGAPNyyPNSFSAPEQQGSALEHHSQcSADVk	0.3176	0.04881
Catalase OS=Rattus norvegicus GN=Cat PE=1 SV=3	sp|P04762|CATA_RAT	dPASDQMk	0.08991	0.1256
Catalase OS=Rattus norvegicus GN=Cat PE=1 SV=3	sp|P04762|CATA_RAT	dYPLIPVGk	0.08987	0.1001
Catalase OS=Rattus norvegicus GN=Cat PE=1 SV=3	sp|P04762|CATA_RAT	dyPLIPVGk	0.02465	0.2555
Catalase OS=Rattus norvegicus GN=Cat PE=1 SV=3	sp|P04762|CATA_RAT	eAETFPFNPFDLTk	0.1057	0.1306
Catalase OS=Rattus norvegicus GN=Cat PE=1 SV=3	sp|P04762|CATA_RAT	fNSANEDNVTQVR	0.04329	0.05828
Catalase OS=Rattus norvegicus GN=Cat PE=1 SV=3	sp|P04762|CATA_RAT	fSTVAGESGSADTVR	0.156	0.0002265
Catalase OS=Rattus norvegicus GN=Cat PE=1 SV=3	sp|P04762|CATA_RAT	fSTVAGESGSADTVRDPR	-0.1816	-0.02114
Catalase OS=Rattus norvegicus GN=Cat PE=1 SV=3	sp|P04762|CATA_RAT	fYTEDGNWDLVGNNTPIFFIR	0.2045	0.00352
Catalase OS=Rattus norvegicus GN=Cat PE=1 SV=3	sp|P04762|CATA_RAT	gAGAFGYFEVTHDITR	-0.01366	-0.03718
Catalase OS=Rattus norvegicus GN=Cat PE=1 SV=3	sp|P04762|CATA_RAT	gAGAFGyFEVTHDITR	-0.139	0.06634
Catalase OS=Rattus norvegicus GN=Cat PE=1 SV=3	sp|P04762|CATA_RAT	gAGAFGYFEVTHDITRYSk	0.1171	0.13
Catalase OS=Rattus norvegicus GN=Cat PE=1 SV=3	sp|P04762|CATA_RAT	gIPDGHR	0.05985	-0.0607
Catalase OS=Rattus norvegicus GN=Cat PE=1 SV=3	sp|P04762|CATA_RAT	gPLLVQDVVFTDEMAHFDR	0.1443	0.003237
Catalase OS=Rattus norvegicus GN=Cat PE=1 SV=3	sp|P04762|CATA_RAT	gPLLVQDVVFTDEMAHFDRER	-0.4095	-0.5534
Catalase OS=Rattus norvegicus GN=Cat PE=1 SV=3	sp|P04762|CATA_RAT	hMNGYGSHTFk	-0.04074	-0.05782
Catalase OS=Rattus norvegicus GN=Cat PE=1 SV=3	sp|P04762|CATA_RAT	lAQEDPDYGLR	0.08421	0.201
Catalase OS=Rattus norvegicus GN=Cat PE=1 SV=3	sp|P04762|CATA_RAT	lAQEDPDyGLR	0.2697	-0.01191
Catalase OS=Rattus norvegicus GN=Cat PE=1 SV=3	sp|P04762|CATA_RAT	lcENIANHLk	-0.04931	0.1481
Catalase OS=Rattus norvegicus GN=Cat PE=1 SV=3	sp|P04762|CATA_RAT	lFAYPDTHR	0.1277	-0.07605
Catalase OS=Rattus norvegicus GN=Cat PE=1 SV=3	sp|P04762|CATA_RAT	lGPNYLQIPVNcPYR	-0.06126	0.02263
Catalase OS=Rattus norvegicus GN=Cat PE=1 SV=3	sp|P04762|CATA_RAT	lGPNYLQIPVNcPyR	-0.827	-0.3725
Catalase OS=Rattus norvegicus GN=Cat PE=1 SV=3	sp|P04762|CATA_RAT	lNIMTAGPR	-0.1067	-0.04019
Catalase OS=Rattus norvegicus GN=Cat PE=1 SV=3	sp|P04762|CATA_RAT	lVNANGEAVYck	0.1616	-0.02905
Catalase OS=Rattus norvegicus GN=Cat PE=1 SV=3	sp|P04762|CATA_RAT	lVNANGEAVyck	0.1944	0.2247
Catalase OS=Rattus norvegicus GN=Cat PE=1 SV=3	sp|P04762|CATA_RAT	nAIHTYVQAGSHIAAk	-0.1534	-0.01019
Catalase OS=Rattus norvegicus GN=Cat PE=1 SV=3	sp|P04762|CATA_RAT	nAIHTyVQAGSHIAAk	-0.3829	-0.2253
Catalase OS=Rattus norvegicus GN=Cat PE=1 SV=3	sp|P04762|CATA_RAT	nFTDVHPDYGAR	-0.004925	0.09251
Catalase OS=Rattus norvegicus GN=Cat PE=1 SV=3	sp|P04762|CATA_RAT	nFTDVHPDyGAR	-0.3335	-0.01233
Catalase OS=Rattus norvegicus GN=Cat PE=1 SV=3	sp|P04762|CATA_RAT	nLPVEEAGR	-0.2235	-0.04833
Catalase OS=Rattus norvegicus GN=Cat PE=1 SV=3	sp|P04762|CATA_RAT	nPANYFAEVEQMAFDPSNMPPGIEPSPDk	0.4006	-0.0167
Catalase OS=Rattus norvegicus GN=Cat PE=1 SV=3	sp|P04762|CATA_RAT	nPANyFAEVEQMAFDPSNMPPGIEPSPDk	0.3707	-0.03705
Catalase OS=Rattus norvegicus GN=Cat PE=1 SV=3	sp|P04762|CATA_RAT	nPQTHLk	-0.05076	-0.1923
Catalase OS=Rattus norvegicus GN=Cat PE=1 SV=3	sp|P04762|CATA_RAT	rFNSANEDNVTQVR	-0.02048	-0.01842
Catalase OS=Rattus norvegicus GN=Cat PE=1 SV=3	sp|P04762|CATA_RAT	rLcENIANHLk	0.09595	0.3008
Catalase OS=Rattus norvegicus GN=Cat PE=1 SV=3	sp|P04762|CATA_RAT	rTPIAVR	-0.3628	-0.1635
Catalase OS=Rattus norvegicus GN=Cat PE=1 SV=3	sp|P04762|CATA_RAT	vFEHIGk	-0.05785	0.04341
Catalase OS=Rattus norvegicus GN=Cat PE=1 SV=3	sp|P04762|CATA_RAT	vLNEEER	-0.03288	-0.0639
Catalase OS=Rattus norvegicus GN=Cat PE=1 SV=3	sp|P04762|CATA_RAT	vQALLDQYNSQkPk	0.07633	-0.09809
Catalase OS=Rattus norvegicus GN=Cat PE=1 SV=3	sp|P04762|CATA_RAT	vQALLDQyNSQkPk	-0.03083	0.07561
Catalase OS=Rattus norvegicus GN=Cat PE=1 SV=3	sp|P04762|CATA_RAT	vWPHkDYPLIPVGk	-0.372	-0.0812
Pyruvate carboxylase, mitochondrial OS=Rattus norvegicus GN=Pc PE=1 SV=2	sp|P52873|PYC_RAT	aAYGGGGR	0.2711	-0.8087
Pyruvate carboxylase, mitochondrial OS=Rattus norvegicus GN=Pc PE=1 SV=2	sp|P52873|PYC_RAT	acTELGIR	-0.1417	-0.1273
Pyruvate carboxylase, mitochondrial OS=Rattus norvegicus GN=Pc PE=1 SV=2	sp|P52873|PYC_RAT	aDEAYLIGR	0.07115	-0.1536
Pyruvate carboxylase, mitochondrial OS=Rattus norvegicus GN=Pc PE=1 SV=2	sp|P52873|PYC_RAT	aDFAQAcQDAGVR	-0.1439	0.06725
Pyruvate carboxylase, mitochondrial OS=Rattus norvegicus GN=Pc PE=1 SV=2	sp|P52873|PYC_RAT	aEAEAQAEELSFPR	0.08001	-0.003053
Pyruvate carboxylase, mitochondrial OS=Rattus norvegicus GN=Pc PE=1 SV=2	sp|P52873|PYC_RAT	aGTHILcIk	0.02596	-0.1376
Pyruvate carboxylase, mitochondrial OS=Rattus norvegicus GN=Pc PE=1 SV=2	sp|P52873|PYC_RAT	aIAIAAGVPVVPGTNSPINSLHEAHEFSNTYGFPIIFk	0.1014	0.157
Pyruvate carboxylase, mitochondrial OS=Rattus norvegicus GN=Pc PE=1 SV=2	sp|P52873|PYC_RAT	aLAVSDLNR	-0.1596	-0.08263
Pyruvate carboxylase, mitochondrial OS=Rattus norvegicus GN=Pc PE=1 SV=2	sp|P52873|PYC_RAT	aYSEALAAFGNGALFVEk	0.19	0.1063
Pyruvate carboxylase, mitochondrial OS=Rattus norvegicus GN=Pc PE=1 SV=2	sp|P52873|PYC_RAT	aYVEANQMLGDLIk	0.101	-0.01397
Pyruvate carboxylase, mitochondrial OS=Rattus norvegicus GN=Pc PE=1 SV=2	sp|P52873|PYC_RAT	dAHQSLLATR	0.02441	0.07413
Pyruvate carboxylase, mitochondrial OS=Rattus norvegicus GN=Pc PE=1 SV=2	sp|P52873|PYC_RAT	dFTATFGPLDSLNTR	0.05697	0.09542
Pyruvate carboxylase, mitochondrial OS=Rattus norvegicus GN=Pc PE=1 SV=2	sp|P52873|PYC_RAT	dHPTAATk	-0.7227	0.6893
Pyruvate carboxylase, mitochondrial OS=Rattus norvegicus GN=Pc PE=1 SV=2	sp|P52873|PYC_RAT	dMAGLLkPAAcTMLVSSLR	-0.0572	0.001802
Pyruvate carboxylase, mitochondrial OS=Rattus norvegicus GN=Pc PE=1 SV=2	sp|P52873|PYC_RAT	dMTLEGDDLILEIE	0.4285	-0.04124
Pyruvate carboxylase, mitochondrial OS=Rattus norvegicus GN=Pc PE=1 SV=2	sp|P52873|PYC_RAT	eGPEGFAR	-0.1393	0.1706
Pyruvate carboxylase, mitochondrial OS=Rattus norvegicus GN=Pc PE=1 SV=2	sp|P52873|PYC_RAT	eLIPNIPFQMLLR	-0.2488	0.01403
Pyruvate carboxylase, mitochondrial OS=Rattus norvegicus GN=Pc PE=1 SV=2	sp|P52873|PYC_RAT	eMHFHPk	-0.03815	0.01153
Pyruvate carboxylase, mitochondrial OS=Rattus norvegicus GN=Pc PE=1 SV=2	sp|P52873|PYC_RAT	eNGMDVFR	0.257	-0.2428
Pyruvate carboxylase, mitochondrial OS=Rattus norvegicus GN=Pc PE=1 SV=2	sp|P52873|PYC_RAT	eNGVDAVHPGYGFLSER	0.002398	0.01795
Pyruvate carboxylase, mitochondrial OS=Rattus norvegicus GN=Pc PE=1 SV=2	sp|P52873|PYC_RAT	eNGVDAVHPGyGFLSER	0.1766	0.03476
Pyruvate carboxylase, mitochondrial OS=Rattus norvegicus GN=Pc PE=1 SV=2	sp|P52873|PYC_RAT	fIGPSPEVVR	-0.1229	0.02237
Pyruvate carboxylase, mitochondrial OS=Rattus norvegicus GN=Pc PE=1 SV=2	sp|P52873|PYC_RAT	fLYEcPWR	-0.1093	-0.04335
Pyruvate carboxylase, mitochondrial OS=Rattus norvegicus GN=Pc PE=1 SV=2	sp|P52873|PYC_RAT	gANAVGYTNYPDNVVFk	0.106	0.08555
Pyruvate carboxylase, mitochondrial OS=Rattus norvegicus GN=Pc PE=1 SV=2	sp|P52873|PYC_RAT	gLAPVQAYLHIPDIIk	-0.003828	0.1348
Pyruvate carboxylase, mitochondrial OS=Rattus norvegicus GN=Pc PE=1 SV=2	sp|P52873|PYC_RAT	gLYAAFDcTATMk	0.1324	0.1345
Pyruvate carboxylase, mitochondrial OS=Rattus norvegicus GN=Pc PE=1 SV=2	sp|P52873|PYC_RAT	gQIGAPMPGk	-0.1414	0.08804
Pyruvate carboxylase, mitochondrial OS=Rattus norvegicus GN=Pc PE=1 SV=2	sp|P52873|PYC_RAT	gTPLDTEVPLER	-0.046	-0.1549
Pyruvate carboxylase, mitochondrial OS=Rattus norvegicus GN=Pc PE=1 SV=2	sp|P52873|PYC_RAT	hGEEVTPEDVLSAAMYPDVFAQFk	0.2857	0.1384
Pyruvate carboxylase, mitochondrial OS=Rattus norvegicus GN=Pc PE=1 SV=2	sp|P52873|PYC_RAT	hIEVQILGDQYGNILHLYER	0.1089	0.2375
Pyruvate carboxylase, mitochondrial OS=Rattus norvegicus GN=Pc PE=1 SV=2	sp|P52873|PYC_RAT	hYFIEVNSR	0.05361	-0.008413
Pyruvate carboxylase, mitochondrial OS=Rattus norvegicus GN=Pc PE=1 SV=2	sp|P52873|PYC_RAT	iAEEFEVELER	0.2124	-0.09834
Pyruvate carboxylase, mitochondrial OS=Rattus norvegicus GN=Pc PE=1 SV=2	sp|P52873|PYC_RAT	iEGRPGASLPPLNLk	-0.2706	0.2317
Pyruvate carboxylase, mitochondrial OS=Rattus norvegicus GN=Pc PE=1 SV=2	sp|P52873|PYC_RAT	iNGcAIQcR	-0.147	-0.01504
Pyruvate carboxylase, mitochondrial OS=Rattus norvegicus GN=Pc PE=1 SV=2	sp|P52873|PYC_RAT	iVGDLAQFMVQNGLSR	0.08342	0.1564
Pyruvate carboxylase, mitochondrial OS=Rattus norvegicus GN=Pc PE=1 SV=2	sp|P52873|PYC_RAT	kAYVEANQMLGDLIk	-0.05784	0.03434
Pyruvate carboxylase, mitochondrial OS=Rattus norvegicus GN=Pc PE=1 SV=2	sp|P52873|PYC_RAT	lDNASAFQGAVISPHYDSLLVk	0.1693	0.07243
Pyruvate carboxylase, mitochondrial OS=Rattus norvegicus GN=Pc PE=1 SV=2	sp|P52873|PYC_RAT	lEYkPIk	0.215	0.01665
Pyruvate carboxylase, mitochondrial OS=Rattus norvegicus GN=Pc PE=1 SV=2	sp|P52873|PYC_RAT	lEYkPIkk	0.4324	-0.1932
Pyruvate carboxylase, mitochondrial OS=Rattus norvegicus GN=Pc PE=1 SV=2	sp|P52873|PYC_RAT	lFLQGPk	-0.03751	0.1112
Pyruvate carboxylase, mitochondrial OS=Rattus norvegicus GN=Pc PE=1 SV=2	sp|P52873|PYC_RAT	lLHYLGHVMVNGPTTPIPVk	-0.002257	0.2431
Pyruvate carboxylase, mitochondrial OS=Rattus norvegicus GN=Pc PE=1 SV=2	sp|P52873|PYC_RAT	lLHyLGHVMVNGPTTPIPVk	0.3079	0.4532
Pyruvate carboxylase, mitochondrial OS=Rattus norvegicus GN=Pc PE=1 SV=2	sp|P52873|PYC_RAT	lQVEHTVTEEITDVDLVHAQIHVSEGR	0.2269	-0.03037
Pyruvate carboxylase, mitochondrial OS=Rattus norvegicus GN=Pc PE=1 SV=2	sp|P52873|PYC_RAT	lTSDSVk	-0.03927	-0.01373
Pyruvate carboxylase, mitochondrial OS=Rattus norvegicus GN=Pc PE=1 SV=2	sp|P52873|PYC_RAT	nHQGLLLMDTTFR	-0.03461	0.1105
Pyruvate carboxylase, mitochondrial OS=Rattus norvegicus GN=Pc PE=1 SV=2	sp|P52873|PYC_RAT	qkADEAYLIGR	-0.2278	-0.213
Pyruvate carboxylase, mitochondrial OS=Rattus norvegicus GN=Pc PE=1 SV=2	sp|P52873|PYC_RAT	qVFFELNGQLR	-0.05626	-0.03443
Pyruvate carboxylase, mitochondrial OS=Rattus norvegicus GN=Pc PE=1 SV=2	sp|P52873|PYC_RAT	qVGYENAGTVEFLVDk	0.1867	0.01381
Pyruvate carboxylase, mitochondrial OS=Rattus norvegicus GN=Pc PE=1 SV=2	sp|P52873|PYC_RAT	rLEYkPIk	0.09202	0.04014
Pyruvate carboxylase, mitochondrial OS=Rattus norvegicus GN=Pc PE=1 SV=2	sp|P52873|PYC_RAT	sFQPDTGR	-0.207	-0.156
Pyruvate carboxylase, mitochondrial OS=Rattus norvegicus GN=Pc PE=1 SV=2	sp|P52873|PYC_RAT	sGEGMGIR	0.1685	-0.1406
Pyruvate carboxylase, mitochondrial OS=Rattus norvegicus GN=Pc PE=1 SV=2	sp|P52873|PYC_RAT	sLPDLGLR	-0.1409	-0.1472
Pyruvate carboxylase, mitochondrial OS=Rattus norvegicus GN=Pc PE=1 SV=2	sp|P52873|PYC_RAT	sSTAPVASPNVR	-0.2111	-0.09758
Pyruvate carboxylase, mitochondrial OS=Rattus norvegicus GN=Pc PE=1 SV=2	sp|P52873|PYC_RAT	sVVEFLQGYIGIPHGGFPEPFR	0.07329	0.1498
Pyruvate carboxylase, mitochondrial OS=Rattus norvegicus GN=Pc PE=1 SV=2	sp|P52873|PYC_RAT	sVVEFLQGyIGIPHGGFPEPFR	-0.06501	0.1849
Pyruvate carboxylase, mitochondrial OS=Rattus norvegicus GN=Pc PE=1 SV=2	sp|P52873|PYC_RAT	tVAVYSEQDTGQMHR	0.03742	0.08766
Pyruvate carboxylase, mitochondrial OS=Rattus norvegicus GN=Pc PE=1 SV=2	sp|P52873|PYC_RAT	tVAVySEQDTGQMHR	0.04412	0.09227
Pyruvate carboxylase, mitochondrial OS=Rattus norvegicus GN=Pc PE=1 SV=2	sp|P52873|PYC_RAT	vAkENGVDAVHPGYGFLSER	-0.07727	-0.1889
Pyruvate carboxylase, mitochondrial OS=Rattus norvegicus GN=Pc PE=1 SV=2	sp|P52873|PYC_RAT	vFDYSEYWEGAR	0.556	-0.1466
Pyruvate carboxylase, mitochondrial OS=Rattus norvegicus GN=Pc PE=1 SV=2	sp|P52873|PYC_RAT	vFDySEYWEGAR	0.3986	-0.5175
Pyruvate carboxylase, mitochondrial OS=Rattus norvegicus GN=Pc PE=1 SV=2	sp|P52873|PYC_RAT	vFDYSEyWEGAR	0.2679	0.1302
Pyruvate carboxylase, mitochondrial OS=Rattus norvegicus GN=Pc PE=1 SV=2	sp|P52873|PYC_RAT	vSPSPVDPIVPVVPIGPPPAGFR	-0.01971	0.09009
Pyruvate carboxylase, mitochondrial OS=Rattus norvegicus GN=Pc PE=1 SV=2	sp|P52873|PYC_RAT	vTTEDPAR	0.02748	0.08942
Pyruvate carboxylase, mitochondrial OS=Rattus norvegicus GN=Pc PE=1 SV=2	sp|P52873|PYC_RAT	vVEIAPATHLDPQLR	-0.1638	-0.1813
Pyruvate carboxylase, mitochondrial OS=Rattus norvegicus GN=Pc PE=1 SV=2	sp|P52873|PYC_RAT	vVHSYEELEENYTR	0.1864	0.2678
Pyruvate carboxylase, mitochondrial OS=Rattus norvegicus GN=Pc PE=1 SV=2	sp|P52873|PYC_RAT	vVHSyEELEENYTR	0.06834	-0.1032
Pyruvate carboxylase, mitochondrial OS=Rattus norvegicus GN=Pc PE=1 SV=2	sp|P52873|PYC_RAT	vVHSYEELEENyTR	0.2154	0.02816
ATP synthase subunit beta, mitochondrial OS=Rattus norvegicus GN=Atp5b PE=1 SV=2	sp|P10719|ATPB_RAT	aDkLAEEHGS	-0.1124	0.1615
ATP synthase subunit beta, mitochondrial OS=Rattus norvegicus GN=Atp5b PE=1 SV=2	sp|P10719|ATPB_RAT	aGTATGQIVAVIGAVVDVQFDEGLPPILNALEVQGR	-0.5311	0.2591
ATP synthase subunit beta, mitochondrial OS=Rattus norvegicus GN=Atp5b PE=1 SV=2	sp|P10719|ATPB_RAT	aHGGYSVFAGVGER	-0.0464	-0.0842
ATP synthase subunit beta, mitochondrial OS=Rattus norvegicus GN=Atp5b PE=1 SV=2	sp|P10719|ATPB_RAT	aHGGySVFAGVGER	-0.04395	-0.179
ATP synthase subunit beta, mitochondrial OS=Rattus norvegicus GN=Atp5b PE=1 SV=2	sp|P10719|ATPB_RAT	aIAELGIYPAVDPLDSTSR	0.08201	-0.2475
ATP synthase subunit beta, mitochondrial OS=Rattus norvegicus GN=Atp5b PE=1 SV=2	sp|P10719|ATPB_RAT	aIAELGIyPAVDPLDSTSR	-0.0549	-0.1924
ATP synthase subunit beta, mitochondrial OS=Rattus norvegicus GN=Atp5b PE=1 SV=2	sp|P10719|ATPB_RAT	dQEGQDVLLFIDNIFR	0.1371	-0.0291
ATP synthase subunit beta, mitochondrial OS=Rattus norvegicus GN=Atp5b PE=1 SV=2	sp|P10719|ATPB_RAT	eGNDLYHEMIESGVINLk	0.2397	-0.1827
ATP synthase subunit beta, mitochondrial OS=Rattus norvegicus GN=Atp5b PE=1 SV=2	sp|P10719|ATPB_RAT	eGNDLyHEMIESGVINLk	0.2802	-0.293
ATP synthase subunit beta, mitochondrial OS=Rattus norvegicus GN=Atp5b PE=1 SV=2	sp|P10719|ATPB_RAT	fLSQPFQVAEVFTGHMGk	-0.04487	-0.04629
ATP synthase subunit beta, mitochondrial OS=Rattus norvegicus GN=Atp5b PE=1 SV=2	sp|P10719|ATPB_RAT	fTQAGSEVSALLGR	-0.002494	-0.1452
ATP synthase subunit beta, mitochondrial OS=Rattus norvegicus GN=Atp5b PE=1 SV=2	sp|P10719|ATPB_RAT	gSITSVQAIYVPADDLTDPAPATTFAHLDATTVLSR	0.1334	0.02046
ATP synthase subunit beta, mitochondrial OS=Rattus norvegicus GN=Atp5b PE=1 SV=2	sp|P10719|ATPB_RAT	gSITSVQAIyVPADDLTDPAPATTFAHLDATTVLSR	0.0667	-0.005775
ATP synthase subunit beta, mitochondrial OS=Rattus norvegicus GN=Atp5b PE=1 SV=2	sp|P10719|ATPB_RAT	iGLFGGAGVGk	-0.07859	-0.0874
ATP synthase subunit beta, mitochondrial OS=Rattus norvegicus GN=Atp5b PE=1 SV=2	sp|P10719|ATPB_RAT	iMDPNIVGSEHYDVAR	-0.09232	-0.03292
ATP synthase subunit beta, mitochondrial OS=Rattus norvegicus GN=Atp5b PE=1 SV=2	sp|P10719|ATPB_RAT	iMDPNIVGSEHyDVAR	0.03148	-0.1105
ATP synthase subunit beta, mitochondrial OS=Rattus norvegicus GN=Atp5b PE=1 SV=2	sp|P10719|ATPB_RAT	iMNVIGEPIDER	0.00795	-0.2579
ATP synthase subunit beta, mitochondrial OS=Rattus norvegicus GN=Atp5b PE=1 SV=2	sp|P10719|ATPB_RAT	iPSAVGYQPTLATDMGTMQER	0.1672	-0.1439
ATP synthase subunit beta, mitochondrial OS=Rattus norvegicus GN=Atp5b PE=1 SV=2	sp|P10719|ATPB_RAT	iPSAVGyQPTLATDMGTMQER	0.0602	-0.2995
ATP synthase subunit beta, mitochondrial OS=Rattus norvegicus GN=Atp5b PE=1 SV=2	sp|P10719|ATPB_RAT	iPVGPETLGR	-0.06861	-0.2694
ATP synthase subunit beta, mitochondrial OS=Rattus norvegicus GN=Atp5b PE=1 SV=2	sp|P10719|ATPB_RAT	kGSITSVQAIYVPADDLTDPAPATTFAHLDATTVLSR	-0.05166	-0.1032
ATP synthase subunit beta, mitochondrial OS=Rattus norvegicus GN=Atp5b PE=1 SV=2	sp|P10719|ATPB_RAT	kGSITSVQAIyVPADDLTDPAPATTFAHLDATTVLSR	0.09384	0.008497
ATP synthase subunit beta, mitochondrial OS=Rattus norvegicus GN=Atp5b PE=1 SV=2	sp|P10719|ATPB_RAT	lAEEHGS	0.622	0.1715
ATP synthase subunit beta, mitochondrial OS=Rattus norvegicus GN=Atp5b PE=1 SV=2	sp|P10719|ATPB_RAT	lVLEVAQHLGESTVR	-0.0883	-0.1419
ATP synthase subunit beta, mitochondrial OS=Rattus norvegicus GN=Atp5b PE=1 SV=2	sp|P10719|ATPB_RAT	lVPLkETIk	-1.02	-0.4049
ATP synthase subunit beta, mitochondrial OS=Rattus norvegicus GN=Atp5b PE=1 SV=2	sp|P10719|ATPB_RAT	qFAPIHAEAPEFIEMSVEQEILVTGIk	0.07112	-0.1437
ATP synthase subunit beta, mitochondrial OS=Rattus norvegicus GN=Atp5b PE=1 SV=2	sp|P10719|ATPB_RAT	sLQDIIAILGMDELSEEDkLTVSR	0.1948	-0.1427
ATP synthase subunit beta, mitochondrial OS=Rattus norvegicus GN=Atp5b PE=1 SV=2	sp|P10719|ATPB_RAT	tIAMDGTEGLVR	-0.006073	-0.09981
ATP synthase subunit beta, mitochondrial OS=Rattus norvegicus GN=Atp5b PE=1 SV=2	sp|P10719|ATPB_RAT	tREGNDLYHEMIESGVINLk	-0.1046	-0.0353
ATP synthase subunit beta, mitochondrial OS=Rattus norvegicus GN=Atp5b PE=1 SV=2	sp|P10719|ATPB_RAT	tVLIMELINNVAk	0.06579	-0.07849
ATP synthase subunit beta, mitochondrial OS=Rattus norvegicus GN=Atp5b PE=1 SV=2	sp|P10719|ATPB_RAT	vALTGLTVAEYFR	0.04705	-0.1264
ATP synthase subunit beta, mitochondrial OS=Rattus norvegicus GN=Atp5b PE=1 SV=2	sp|P10719|ATPB_RAT	vALVYGQMNEPPGAR	-0.08421	-0.1934
ATP synthase subunit beta, mitochondrial OS=Rattus norvegicus GN=Atp5b PE=1 SV=2	sp|P10719|ATPB_RAT	vLDSGAPIk	0.001576	-0.1781
ATP synthase subunit beta, mitochondrial OS=Rattus norvegicus GN=Atp5b PE=1 SV=2	sp|P10719|ATPB_RAT	vLDSGAPIkIPVGPETLGR	-0.4639	-0.09809
ATP synthase subunit beta, mitochondrial OS=Rattus norvegicus GN=Atp5b PE=1 SV=2	sp|P10719|ATPB_RAT	vVDLLAPYAk	-0.1204	-0.2028
3-ketoacyl-CoA thiolase, mitochondrial OS=Rattus norvegicus GN=Acaa2 PE=1 SV=1	sp|P13437|THIM_RAT	aALSAGk	0.06222	0.2256
3-ketoacyl-CoA thiolase, mitochondrial OS=Rattus norvegicus GN=Acaa2 PE=1 SV=1	sp|P13437|THIM_RAT	aANEAGYFNEEMAPIEVk	0.1981	0.4228
3-ketoacyl-CoA thiolase, mitochondrial OS=Rattus norvegicus GN=Acaa2 PE=1 SV=1	sp|P13437|THIM_RAT	aANEAGyFNEEMAPIEVk	0.3548	0.4398
3-ketoacyl-CoA thiolase, mitochondrial OS=Rattus norvegicus GN=Acaa2 PE=1 SV=1	sp|P13437|THIM_RAT	dAEVVLcGGTESMSQSPYSVR	0.389	0.1442
3-ketoacyl-CoA thiolase, mitochondrial OS=Rattus norvegicus GN=Acaa2 PE=1 SV=1	sp|P13437|THIM_RAT	dAEVVLcGGTESMSQSPySVR	0.3368	0.1976
3-ketoacyl-CoA thiolase, mitochondrial OS=Rattus norvegicus GN=Acaa2 PE=1 SV=1	sp|P13437|THIM_RAT	dFTATDLTEFAAR	0.1852	0.4372
3-ketoacyl-CoA thiolase, mitochondrial OS=Rattus norvegicus GN=Acaa2 PE=1 SV=1	sp|P13437|THIM_RAT	dMDLIDVNEAFAPQFLAVQk	0.3038	0.1064
3-ketoacyl-CoA thiolase, mitochondrial OS=Rattus norvegicus GN=Acaa2 PE=1 SV=1	sp|P13437|THIM_RAT	eGTVTAGNASGMSDGAGVVIIASEDAVk	0.3568	0.1892
3-ketoacyl-CoA thiolase, mitochondrial OS=Rattus norvegicus GN=Acaa2 PE=1 SV=1	sp|P13437|THIM_RAT	eGTVTAGNASGMSDGAGVVIIASEDAVkk	0.3841	0.196
3-ketoacyl-CoA thiolase, mitochondrial OS=Rattus norvegicus GN=Acaa2 PE=1 SV=1	sp|P13437|THIM_RAT	gVFIVAAk	-0.07271	0.4031
3-ketoacyl-CoA thiolase, mitochondrial OS=Rattus norvegicus GN=Acaa2 PE=1 SV=1	sp|P13437|THIM_RAT	hNFTPLAR	-0.007258	0.2865
3-ketoacyl-CoA thiolase, mitochondrial OS=Rattus norvegicus GN=Acaa2 PE=1 SV=1	sp|P13437|THIM_RAT	iTAHLVHELR	-0.02888	0.2599
3-ketoacyl-CoA thiolase, mitochondrial OS=Rattus norvegicus GN=Acaa2 PE=1 SV=1	sp|P13437|THIM_RAT	kAGLSLk	0.02818	0.1947
3-ketoacyl-CoA thiolase, mitochondrial OS=Rattus norvegicus GN=Acaa2 PE=1 SV=1	sp|P13437|THIM_RAT	kEGTVTAGNASGMSDGAGVVIIASEDAVk	0.6009	0.05513
3-ketoacyl-CoA thiolase, mitochondrial OS=Rattus norvegicus GN=Acaa2 PE=1 SV=1	sp|P13437|THIM_RAT	kHNFTPLAR	0.01543	0.4288
3-ketoacyl-CoA thiolase, mitochondrial OS=Rattus norvegicus GN=Acaa2 PE=1 SV=1	sp|P13437|THIM_RAT	lcGSGFQSIVSGcQEIcSk	0.3305	0.3325
3-ketoacyl-CoA thiolase, mitochondrial OS=Rattus norvegicus GN=Acaa2 PE=1 SV=1	sp|P13437|THIM_RAT	lEDTLWAGLTDQHVk	0.1876	0.235
3-ketoacyl-CoA thiolase, mitochondrial OS=Rattus norvegicus GN=Acaa2 PE=1 SV=1	sp|P13437|THIM_RAT	lPMGMTAENLAAk	0.1855	0.2666
3-ketoacyl-CoA thiolase, mitochondrial OS=Rattus norvegicus GN=Acaa2 PE=1 SV=1	sp|P13437|THIM_RAT	sLDLDPSk	0.1161	0.2616
3-ketoacyl-CoA thiolase, mitochondrial OS=Rattus norvegicus GN=Acaa2 PE=1 SV=1	sp|P13437|THIM_RAT	tNVSGGAIALGHPLGGSGSR	0.134	0.1141
3-ketoacyl-CoA thiolase, mitochondrial OS=Rattus norvegicus GN=Acaa2 PE=1 SV=1	sp|P13437|THIM_RAT	tPFGAYGGLLk	-0.1023	0.1889
3-ketoacyl-CoA thiolase, mitochondrial OS=Rattus norvegicus GN=Acaa2 PE=1 SV=1	sp|P13437|THIM_RAT	vGVPTETGALTLNR	-0.06096	0.2391
3-ketoacyl-CoA thiolase, mitochondrial OS=Rattus norvegicus GN=Acaa2 PE=1 SV=1	sp|P13437|THIM_RAT	vPPETIDSVIVGNVMQSSSDAAYLAR	0.2257	0.2037
3-ketoacyl-CoA thiolase, mitochondrial OS=Rattus norvegicus GN=Acaa2 PE=1 SV=1	sp|P13437|THIM_RAT	vPPETIDSVIVGNVMQSSSDAAyLAR	0.2704	0.1525
3-ketoacyl-CoA thiolase, mitochondrial OS=Rattus norvegicus GN=Acaa2 PE=1 SV=1	sp|P13437|THIM_RAT	vVGYFVSGcDPAIMGIGPVPAITGALk	0.1651	0.1841
3-ketoacyl-CoA thiolase, mitochondrial OS=Rattus norvegicus GN=Acaa2 PE=1 SV=1	sp|P13437|THIM_RAT	vVGyFVSGcDPAIMGIGPVPAITGALk	-0.067	0.277
3-ketoacyl-CoA thiolase, mitochondrial OS=Rattus norvegicus GN=Acaa2 PE=1 SV=1	sp|P13437|THIM_RAT	yALQSQQR	0.1041	0.1369
3-ketoacyl-CoA thiolase, mitochondrial OS=Rattus norvegicus GN=Acaa2 PE=1 SV=1	sp|P13437|THIM_RAT	yAVGSAcIGGGQGISLIIQNTA	-0.5632	0.2421
Methylmalonate-semialdehyde dehydrogenase [acylating], mitochondrial OS=Rattus norvegicus GN=Aldh6a1 PE=1 SV=1	sp|Q02253|MMSA_RAT	aEMEAAVAAck	0.09814	0.1954
Methylmalonate-semialdehyde dehydrogenase [acylating], mitochondrial OS=Rattus norvegicus GN=Aldh6a1 PE=1 SV=1	sp|Q02253|MMSA_RAT	aEMEAAVAAckR	0.02259	0.06547
Methylmalonate-semialdehyde dehydrogenase [acylating], mitochondrial OS=Rattus norvegicus GN=Aldh6a1 PE=1 SV=1	sp|Q02253|MMSA_RAT	aFPAWADTSILSR	-0.01003	0.1808
Methylmalonate-semialdehyde dehydrogenase [acylating], mitochondrial OS=Rattus norvegicus GN=Aldh6a1 PE=1 SV=1	sp|Q02253|MMSA_RAT	aISFVGSNQAGEYIFER	0.1436	0.1697
Methylmalonate-semialdehyde dehydrogenase [acylating], mitochondrial OS=Rattus norvegicus GN=Aldh6a1 PE=1 SV=1	sp|Q02253|MMSA_RAT	aISFVGSNQAGEyIFER	0.3804	-0.4771
Methylmalonate-semialdehyde dehydrogenase [acylating], mitochondrial OS=Rattus norvegicus GN=Aldh6a1 PE=1 SV=1	sp|Q02253|MMSA_RAT	cMALSTAVLVGEAk	0.07234	0.1735
Methylmalonate-semialdehyde dehydrogenase [acylating], mitochondrial OS=Rattus norvegicus GN=Aldh6a1 PE=1 SV=1	sp|Q02253|MMSA_RAT	dMDLYSYR	0.3254	-0.03877
Methylmalonate-semialdehyde dehydrogenase [acylating], mitochondrial OS=Rattus norvegicus GN=Aldh6a1 PE=1 SV=1	sp|Q02253|MMSA_RAT	dMDLYSyR	0.1122	-0.192
Methylmalonate-semialdehyde dehydrogenase [acylating], mitochondrial OS=Rattus norvegicus GN=Aldh6a1 PE=1 SV=1	sp|Q02253|MMSA_RAT	eEDATLSSPAVVMPTMGR	0.1201	-0.02192
Methylmalonate-semialdehyde dehydrogenase [acylating], mitochondrial OS=Rattus norvegicus GN=Aldh6a1 PE=1 SV=1	sp|Q02253|MMSA_RAT	eEIFGPVLVVLETETLDEAIk	0.3099	0.1459
Methylmalonate-semialdehyde dehydrogenase [acylating], mitochondrial OS=Rattus norvegicus GN=Aldh6a1 PE=1 SV=1	sp|Q02253|MMSA_RAT	eGASILLDGR	0.04755	0.06101
Methylmalonate-semialdehyde dehydrogenase [acylating], mitochondrial OS=Rattus norvegicus GN=Aldh6a1 PE=1 SV=1	sp|Q02253|MMSA_RAT	eGASILLDGRk	-0.2442	0.03076
Methylmalonate-semialdehyde dehydrogenase [acylating], mitochondrial OS=Rattus norvegicus GN=Aldh6a1 PE=1 SV=1	sp|Q02253|MMSA_RAT	eNTLNQLVGAAFGAAGQR	0.1741	0.1493
Methylmalonate-semialdehyde dehydrogenase [acylating], mitochondrial OS=Rattus norvegicus GN=Aldh6a1 PE=1 SV=1	sp|Q02253|MMSA_RAT	gDTNFYGk	0.02025	0.2101
Methylmalonate-semialdehyde dehydrogenase [acylating], mitochondrial OS=Rattus norvegicus GN=Aldh6a1 PE=1 SV=1	sp|Q02253|MMSA_RAT	gLQVVEHAcSVTSLMLGETMPSITk	0.03321	0.4836
Methylmalonate-semialdehyde dehydrogenase [acylating], mitochondrial OS=Rattus norvegicus GN=Aldh6a1 PE=1 SV=1	sp|Q02253|MMSA_RAT	gYENGNFVGPTIISNVkPSMTcYk	0.2971	0.03669
Methylmalonate-semialdehyde dehydrogenase [acylating], mitochondrial OS=Rattus norvegicus GN=Aldh6a1 PE=1 SV=1	sp|Q02253|MMSA_RAT	iVNDNPYGNGTAIFTTNGAIAR	0.1261	0.2405
Methylmalonate-semialdehyde dehydrogenase [acylating], mitochondrial OS=Rattus norvegicus GN=Aldh6a1 PE=1 SV=1	sp|Q02253|MMSA_RAT	iVNDNPyGNGTAIFTTNGAIAR	0.08756	0.3219
Methylmalonate-semialdehyde dehydrogenase [acylating], mitochondrial OS=Rattus norvegicus GN=Aldh6a1 PE=1 SV=1	sp|Q02253|MMSA_RAT	kWLPELVER	-0.08756	0.1818
Methylmalonate-semialdehyde dehydrogenase [acylating], mitochondrial OS=Rattus norvegicus GN=Aldh6a1 PE=1 SV=1	sp|Q02253|MMSA_RAT	lITLEQGk	-0.1629	0.1672
Methylmalonate-semialdehyde dehydrogenase [acylating], mitochondrial OS=Rattus norvegicus GN=Aldh6a1 PE=1 SV=1	sp|Q02253|MMSA_RAT	lLQDSGAPDGTLNIIHGQHEAVNFIcDHPDIk	0.125	0.1489
Methylmalonate-semialdehyde dehydrogenase [acylating], mitochondrial OS=Rattus norvegicus GN=Aldh6a1 PE=1 SV=1	sp|Q02253|MMSA_RAT	nHGVVMPDANk	0.2677	0.2329
Methylmalonate-semialdehyde dehydrogenase [acylating], mitochondrial OS=Rattus norvegicus GN=Aldh6a1 PE=1 SV=1	sp|Q02253|MMSA_RAT	nHGVVMPDANkENTLNQLVGAAFGAAGQR	0.1132	0.2256
Methylmalonate-semialdehyde dehydrogenase [acylating], mitochondrial OS=Rattus norvegicus GN=Aldh6a1 PE=1 SV=1	sp|Q02253|MMSA_RAT	qGIQFYTQLk	-0.1662	0.08161
Methylmalonate-semialdehyde dehydrogenase [acylating], mitochondrial OS=Rattus norvegicus GN=Aldh6a1 PE=1 SV=1	sp|Q02253|MMSA_RAT	sDkWIDIHNPATNEVVGR	-0.3568	0.1931
Methylmalonate-semialdehyde dehydrogenase [acylating], mitochondrial OS=Rattus norvegicus GN=Aldh6a1 PE=1 SV=1	sp|Q02253|MMSA_RAT	tITSQWk	0.1912	0.1272
Methylmalonate-semialdehyde dehydrogenase [acylating], mitochondrial OS=Rattus norvegicus GN=Aldh6a1 PE=1 SV=1	sp|Q02253|MMSA_RAT	tITSQWkEEDATLSSPAVVMPTMGR	-0.345	-0.1396
Methylmalonate-semialdehyde dehydrogenase [acylating], mitochondrial OS=Rattus norvegicus GN=Aldh6a1 PE=1 SV=1	sp|Q02253|MMSA_RAT	tLADAEGDVFR	0.05856	0.1576
Methylmalonate-semialdehyde dehydrogenase [acylating], mitochondrial OS=Rattus norvegicus GN=Aldh6a1 PE=1 SV=1	sp|Q02253|MMSA_RAT	vcNLIDSGAk	-0.06794	0.1742
Methylmalonate-semialdehyde dehydrogenase [acylating], mitochondrial OS=Rattus norvegicus GN=Aldh6a1 PE=1 SV=1	sp|Q02253|MMSA_RAT	vNAGDQPGADLGPLITPQAk	-0.03322	0.1406
Methylmalonate-semialdehyde dehydrogenase [acylating], mitochondrial OS=Rattus norvegicus GN=Aldh6a1 PE=1 SV=1	sp|Q02253|MMSA_RAT	vPGATMLLAk	-0.02554	0.1164
Methylmalonate-semialdehyde dehydrogenase [acylating], mitochondrial OS=Rattus norvegicus GN=Aldh6a1 PE=1 SV=1	sp|Q02253|MMSA_RAT	vQANMGAk	-0.1411	0.2961
Methylmalonate-semialdehyde dehydrogenase [acylating], mitochondrial OS=Rattus norvegicus GN=Aldh6a1 PE=1 SV=1	sp|Q02253|MMSA_RAT	wIDIHNPATNEVVGR	0.01002	0.1039
Methylmalonate-semialdehyde dehydrogenase [acylating], mitochondrial OS=Rattus norvegicus GN=Aldh6a1 PE=1 SV=1	sp|Q02253|MMSA_RAT	wLPELVER	-0.1292	0.03458
Methylmalonate-semialdehyde dehydrogenase [acylating], mitochondrial OS=Rattus norvegicus GN=Aldh6a1 PE=1 SV=1	sp|Q02253|MMSA_RAT	yAHMVDVGQVGVNVPIPVPLPMFSFTGSR	0.1632	0.2272
Fructose-bisphosphate aldolase B OS=Rattus norvegicus GN=Aldob PE=1 SV=2	sp|P00884|ALDOB_RAT	aLNDHHVYLEGTLLkPNMLTAGHAcTk	-0.2189	0.3364
Fructose-bisphosphate aldolase B OS=Rattus norvegicus GN=Aldob PE=1 SV=2	sp|P00884|ALDOB_RAT	aLQASALAAWGGk	0.0716	0.192
Fructose-bisphosphate aldolase B OS=Rattus norvegicus GN=Aldob PE=1 SV=2	sp|P00884|ALDOB_RAT	aTQEAFMk	-0.03318	0.2921
Fructose-bisphosphate aldolase B OS=Rattus norvegicus GN=Aldob PE=1 SV=2	sp|P00884|ALDOB_RAT	dGVDFGk	0.0279	0.3464
Fructose-bisphosphate aldolase B OS=Rattus norvegicus GN=Aldob PE=1 SV=2	sp|P00884|ALDOB_RAT	ekGIVVGIk	-0.4507	0.1681
Fructose-bisphosphate aldolase B OS=Rattus norvegicus GN=Aldob PE=1 SV=2	sp|P00884|ALDOB_RAT	eLSEIAQR	-0.03717	-0.03706
Fructose-bisphosphate aldolase B OS=Rattus norvegicus GN=Aldob PE=1 SV=2	sp|P00884|ALDOB_RAT	eTTIQGLDGLSER	-0.1104	0.1073
Fructose-bisphosphate aldolase B OS=Rattus norvegicus GN=Aldob PE=1 SV=2	sp|P00884|ALDOB_RAT	fPALTSEQk	0.006058	0.2594
Fructose-bisphosphate aldolase B OS=Rattus norvegicus GN=Aldob PE=1 SV=2	sp|P00884|ALDOB_RAT	gILAADESVGTMGNR	0.2787	0.1407
Fructose-bisphosphate aldolase B OS=Rattus norvegicus GN=Aldob PE=1 SV=2	sp|P00884|ALDOB_RAT	gIVVGIk	-0.1119	0.3705
Fructose-bisphosphate aldolase B OS=Rattus norvegicus GN=Aldob PE=1 SV=2	sp|P00884|ALDOB_RAT	ikVENTEENR	0.1734	0.1634
Fructose-bisphosphate aldolase B OS=Rattus norvegicus GN=Aldob PE=1 SV=2	sp|P00884|ALDOB_RAT	ikVENTEENRR	-0.05803	0.2093
Fructose-bisphosphate aldolase B OS=Rattus norvegicus GN=Aldob PE=1 SV=2	sp|P00884|ALDOB_RAT	iSDQcPSSLAIQENANALAR	0.1596	0.2195
Fructose-bisphosphate aldolase B OS=Rattus norvegicus GN=Aldob PE=1 SV=2	sp|P00884|ALDOB_RAT	kATQEAFMk	0.03383	0.231
Fructose-bisphosphate aldolase B OS=Rattus norvegicus GN=Aldob PE=1 SV=2	sp|P00884|ALDOB_RAT	kELSEIAQR	0.01021	0.2352
Fructose-bisphosphate aldolase B OS=Rattus norvegicus GN=Aldob PE=1 SV=2	sp|P00884|ALDOB_RAT	kYTPEQVAMATVTALHR	-0.1418	0.3162
Fructose-bisphosphate aldolase B OS=Rattus norvegicus GN=Aldob PE=1 SV=2	sp|P00884|ALDOB_RAT	lDQGGAPLAGTNk	-0.0151	0.4013
Fructose-bisphosphate aldolase B OS=Rattus norvegicus GN=Aldob PE=1 SV=2	sp|P00884|ALDOB_RAT	lDQGGAPLAGTNkETTIQGLDGLSER	0.2708	0.1586
Fructose-bisphosphate aldolase B OS=Rattus norvegicus GN=Aldob PE=1 SV=2	sp|P00884|ALDOB_RAT	lSFSYGR	0.07574	0.1681
Fructose-bisphosphate aldolase B OS=Rattus norvegicus GN=Aldob PE=1 SV=2	sp|P00884|ALDOB_RAT	vENTEENR	0.2151	-0.209
Fructose-bisphosphate aldolase B OS=Rattus norvegicus GN=Aldob PE=1 SV=2	sp|P00884|ALDOB_RAT	yASIcQQNGLVPIVEPEVLPDGDHDLEHcQYVSEk	0.3792	0.1807
Fructose-bisphosphate aldolase B OS=Rattus norvegicus GN=Aldob PE=1 SV=2	sp|P00884|ALDOB_RAT	yASIcQQNGLVPIVEPEVLPDGDHDLEHcQYVSEk	0.1854	0.217
Fructose-bisphosphate aldolase B OS=Rattus norvegicus GN=Aldob PE=1 SV=2	sp|P00884|ALDOB_RAT	yASIcQQNGLVPIVEPEVLPDGDHDLEHcQyVSEk	0.4177	0.214
Fructose-bisphosphate aldolase B OS=Rattus norvegicus GN=Aldob PE=1 SV=2	sp|P00884|ALDOB_RAT	yASIcQQNGLVPIVEPEVLPDGDHDLEHcQyVSEk	-0.07265	0.01261
Fructose-bisphosphate aldolase B OS=Rattus norvegicus GN=Aldob PE=1 SV=2	sp|P00884|ALDOB_RAT	yTPEQVAMATVTALHR	0.06173	0.2249
Hydroxymethylglutaryl-CoA synthase, mitochondrial OS=Rattus norvegicus GN=Hmgcs2 PE=2 SV=1	sp|P22791|HMCS2_RAT	aPLVLEQGLR	-0.2556	-0.07
Hydroxymethylglutaryl-CoA synthase, mitochondrial OS=Rattus norvegicus GN=Hmgcs2 PE=2 SV=1	sp|P22791|HMCS2_RAT	aSLDMFNk	-0.1062	-0.02107
Hydroxymethylglutaryl-CoA synthase, mitochondrial OS=Rattus norvegicus GN=Hmgcs2 PE=2 SV=1	sp|P22791|HMCS2_RAT	aSLDMFNkk	-0.4215	0.02685
Hydroxymethylglutaryl-CoA synthase, mitochondrial OS=Rattus norvegicus GN=Hmgcs2 PE=2 SV=1	sp|P22791|HMCS2_RAT	dASPGSPLEk	-0.1383	-0.08596
Hydroxymethylglutaryl-CoA synthase, mitochondrial OS=Rattus norvegicus GN=Hmgcs2 PE=2 SV=1	sp|P22791|HMCS2_RAT	dVDkALLk	-0.3917	-0.05919
Hydroxymethylglutaryl-CoA synthase, mitochondrial OS=Rattus norvegicus GN=Hmgcs2 PE=2 SV=1	sp|P22791|HMCS2_RAT	dVGILALEVYFPAQYVDQTDLEk	-0.3356	-0.2902
Hydroxymethylglutaryl-CoA synthase, mitochondrial OS=Rattus norvegicus GN=Hmgcs2 PE=2 SV=1	sp|P22791|HMCS2_RAT	fNNVEAGk	-0.2446	-0.2071
Hydroxymethylglutaryl-CoA synthase, mitochondrial OS=Rattus norvegicus GN=Hmgcs2 PE=2 SV=1	sp|P22791|HMCS2_RAT	gLkLEETYTNk	-0.5037	-0.2729
Hydroxymethylglutaryl-CoA synthase, mitochondrial OS=Rattus norvegicus GN=Hmgcs2 PE=2 SV=1	sp|P22791|HMCS2_RAT	gTHMENAYDFYkPNLASEYPLVDGk	0.19	-0.1499
Hydroxymethylglutaryl-CoA synthase, mitochondrial OS=Rattus norvegicus GN=Hmgcs2 PE=2 SV=1	sp|P22791|HMCS2_RAT	gTHMENAyDFYkPNLASEYPLVDGk	0.2079	-0.05288
Hydroxymethylglutaryl-CoA synthase, mitochondrial OS=Rattus norvegicus GN=Hmgcs2 PE=2 SV=1	sp|P22791|HMCS2_RAT	gTHMENAYDFykPNLASEYPLVDGk	0.2044	-0.04786
Hydroxymethylglutaryl-CoA synthase, mitochondrial OS=Rattus norvegicus GN=Hmgcs2 PE=2 SV=1	sp|P22791|HMCS2_RAT	gTHMENAYDFYkPNLASEyPLVDGk	0.1222	-0.1003
Hydroxymethylglutaryl-CoA synthase, mitochondrial OS=Rattus norvegicus GN=Hmgcs2 PE=2 SV=1	sp|P22791|HMCS2_RAT	kIQNQWk	-0.2553	-0.2611
Hydroxymethylglutaryl-CoA synthase, mitochondrial OS=Rattus norvegicus GN=Hmgcs2 PE=2 SV=1	sp|P22791|HMCS2_RAT	lEETYTNk	0.1085	-0.08109
Hydroxymethylglutaryl-CoA synthase, mitochondrial OS=Rattus norvegicus GN=Hmgcs2 PE=2 SV=1	sp|P22791|HMCS2_RAT	lEETYTNkDVDk	-0.2627	-0.106
Hydroxymethylglutaryl-CoA synthase, mitochondrial OS=Rattus norvegicus GN=Hmgcs2 PE=2 SV=1	sp|P22791|HMCS2_RAT	lEETyTNkDVDk	-0.4569	0.2629
Hydroxymethylglutaryl-CoA synthase, mitochondrial OS=Rattus norvegicus GN=Hmgcs2 PE=2 SV=1	sp|P22791|HMCS2_RAT	lMFNDFLSSSSDk	0.2637	0.006204
Hydroxymethylglutaryl-CoA synthase, mitochondrial OS=Rattus norvegicus GN=Hmgcs2 PE=2 SV=1	sp|P22791|HMCS2_RAT	lMFNDFLSSSSDkQNNLYk	0.03732	-0.2496
Hydroxymethylglutaryl-CoA synthase, mitochondrial OS=Rattus norvegicus GN=Hmgcs2 PE=2 SV=1	sp|P22791|HMCS2_RAT	lPWDAVGR	-0.0911	-0.2449
Hydroxymethylglutaryl-CoA synthase, mitochondrial OS=Rattus norvegicus GN=Hmgcs2 PE=2 SV=1	sp|P22791|HMCS2_RAT	lSIQcYLR	-0.2416	-0.07855
Hydroxymethylglutaryl-CoA synthase, mitochondrial OS=Rattus norvegicus GN=Hmgcs2 PE=2 SV=1	sp|P22791|HMCS2_RAT	lVSSVSDLPk	-0.1857	-0.03306
Hydroxymethylglutaryl-CoA synthase, mitochondrial OS=Rattus norvegicus GN=Hmgcs2 PE=2 SV=1	sp|P22791|HMCS2_RAT	lVSSVSDLPkR	0.6399	-0.803
Hydroxymethylglutaryl-CoA synthase, mitochondrial OS=Rattus norvegicus GN=Hmgcs2 PE=2 SV=1	sp|P22791|HMCS2_RAT	mGFcSVQEDINSLcLTVVQR	0.2575	0.1478
Hydroxymethylglutaryl-CoA synthase, mitochondrial OS=Rattus norvegicus GN=Hmgcs2 PE=2 SV=1	sp|P22791|HMCS2_RAT	mSPEEFTEIMNQR	0.2073	-0.1789
Hydroxymethylglutaryl-CoA synthase, mitochondrial OS=Rattus norvegicus GN=Hmgcs2 PE=2 SV=1	sp|P22791|HMCS2_RAT	qAGNNQPFTLDDVQYMIFHTPFck	-0.145	0.1345
Hydroxymethylglutaryl-CoA synthase, mitochondrial OS=Rattus norvegicus GN=Hmgcs2 PE=2 SV=1	sp|P22791|HMCS2_RAT	rMSPEEFTEIMNQR	-0.267	-0.1313
Hydroxymethylglutaryl-CoA synthase, mitochondrial OS=Rattus norvegicus GN=Hmgcs2 PE=2 SV=1	sp|P22791|HMCS2_RAT	tkLPWDAVGR	-0.2299	-0.1844
Hydroxymethylglutaryl-CoA synthase, mitochondrial OS=Rattus norvegicus GN=Hmgcs2 PE=2 SV=1	sp|P22791|HMCS2_RAT	vNFSPPGDTSNLFPGTWYLER	0.1275	-0.1088
Hydroxymethylglutaryl-CoA synthase, mitochondrial OS=Rattus norvegicus GN=Hmgcs2 PE=2 SV=1	sp|P22791|HMCS2_RAT	vNFSPPGDTSNLFPGTWyLER	0.1187	-0.04017
Hydroxymethylglutaryl-CoA synthase, mitochondrial OS=Rattus norvegicus GN=Hmgcs2 PE=2 SV=1	sp|P22791|HMCS2_RAT	yTVGLGQTR	-0.1322	-0.1753
Serum albumin OS=Rattus norvegicus GN=Alb PE=1 SV=2	sp|P02770|ALBU_RAT	aAcLTPk	-0.05287	0.3381
Serum albumin OS=Rattus norvegicus GN=Alb PE=1 SV=2	sp|P02770|ALBU_RAT	aADkDNcFATEGPNLVAR	0.059	0.2725
Serum albumin OS=Rattus norvegicus GN=Alb PE=1 SV=2	sp|P02770|ALBU_RAT	aETFTFHSDIcTLPDk	0.2386	0.1933
Serum albumin OS=Rattus norvegicus GN=Alb PE=1 SV=2	sp|P02770|ALBU_RAT	aETFTFHSDIcTLPDkEk	0.053	0.2931
Serum albumin OS=Rattus norvegicus GN=Alb PE=1 SV=2	sp|P02770|ALBU_RAT	aLVAAVR	-0.3321	0.1776
Serum albumin OS=Rattus norvegicus GN=Alb PE=1 SV=2	sp|P02770|ALBU_RAT	aPQVSTPTLVEAAR	-0.2275	0.1985
Serum albumin OS=Rattus norvegicus GN=Alb PE=1 SV=2	sp|P02770|ALBU_RAT	aTEDQLk	0.4075	0.8172
Serum albumin OS=Rattus norvegicus GN=Alb PE=1 SV=2	sp|P02770|ALBU_RAT	ccAEGDPPAcYGTVLAEFQPLVEEPk	0.1561	0.2103
Serum albumin OS=Rattus norvegicus GN=Alb PE=1 SV=2	sp|P02770|ALBU_RAT	ccAEGDPPAcyGTVLAEFQPLVEEPk	0.2874	0.2605
Serum albumin OS=Rattus norvegicus GN=Alb PE=1 SV=2	sp|P02770|ALBU_RAT	ccSGSLVER	-0.0767	0.0973
Serum albumin OS=Rattus norvegicus GN=Alb PE=1 SV=2	sp|P02770|ALBU_RAT	ccTLPEAQR	-0.1341	0.08771
Serum albumin OS=Rattus norvegicus GN=Alb PE=1 SV=2	sp|P02770|ALBU_RAT	cPYEEHIk	-0.1027	0.07775
Serum albumin OS=Rattus norvegicus GN=Alb PE=1 SV=2	sp|P02770|ALBU_RAT	cPyEEHIk	0.2697	0.004865
Serum albumin OS=Rattus norvegicus GN=Alb PE=1 SV=2	sp|P02770|ALBU_RAT	dDNPNLPPFQRPEAEAMcTSFQENPTSFLGHYLHEVAR	0.2598	0.5957
Serum albumin OS=Rattus norvegicus GN=Alb PE=1 SV=2	sp|P02770|ALBU_RAT	dDNPNLPPFQRPEAEAMcTSFQENPTSFLGHyLHEVAR	0.2334	0.3815
Serum albumin OS=Rattus norvegicus GN=Alb PE=1 SV=2	sp|P02770|ALBU_RAT	dLGEQHFk	0.227	0.2928
Serum albumin OS=Rattus norvegicus GN=Alb PE=1 SV=2	sp|P02770|ALBU_RAT	dNcFATEGPNLVAR	0.1844	0.2265
Serum albumin OS=Rattus norvegicus GN=Alb PE=1 SV=2	sp|P02770|ALBU_RAT	dNYGELADccAk	0.1872	0.243
Serum albumin OS=Rattus norvegicus GN=Alb PE=1 SV=2	sp|P02770|ALBU_RAT	dNyGELADccAk	0.277	0.2833
Serum albumin OS=Rattus norvegicus GN=Alb PE=1 SV=2	sp|P02770|ALBU_RAT	dVFLGTFLYEYSR	0.2844	0.2347
Serum albumin OS=Rattus norvegicus GN=Alb PE=1 SV=2	sp|P02770|ALBU_RAT	eccHGDLLEcADDR	0.3377	0.1036
Serum albumin OS=Rattus norvegicus GN=Alb PE=1 SV=2	sp|P02770|ALBU_RAT	eccHGDLLEcADDRAELAk	0.08208	0.2422
Serum albumin OS=Rattus norvegicus GN=Alb PE=1 SV=2	sp|P02770|ALBU_RAT	fkDLGEQHFk	-0.1207	0.4421
Serum albumin OS=Rattus norvegicus GN=Alb PE=1 SV=2	sp|P02770|ALBU_RAT	fPNAEFAEITk	-0.1022	0.4497
Serum albumin OS=Rattus norvegicus GN=Alb PE=1 SV=2	sp|P02770|ALBU_RAT	gLVLIAFSQYLQk	0.2452	0.3768
Serum albumin OS=Rattus norvegicus GN=Alb PE=1 SV=2	sp|P02770|ALBU_RAT	hPDYSVSLLLR	0.001402	0.1618
Serum albumin OS=Rattus norvegicus GN=Alb PE=1 SV=2	sp|P02770|ALBU_RAT	hPYFYAPELLYYAEk	0.04658	0.6032
Serum albumin OS=Rattus norvegicus GN=Alb PE=1 SV=2	sp|P02770|ALBU_RAT	iNkEccHGDLLEcADDR	-0.2476	0.08066
Serum albumin OS=Rattus norvegicus GN=Alb PE=1 SV=2	sp|P02770|ALBU_RAT	kQTALAELVk	-0.1092	0.3441
Serum albumin OS=Rattus norvegicus GN=Alb PE=1 SV=2	sp|P02770|ALBU_RAT	kYEATLEk	0.1434	0.2403
Serum albumin OS=Rattus norvegicus GN=Alb PE=1 SV=2	sp|P02770|ALBU_RAT	kyEATLEk	0.05992	0.4531
Serum albumin OS=Rattus norvegicus GN=Alb PE=1 SV=2	sp|P02770|ALBU_RAT	lATDVTk	-0.05813	0.2647
Serum albumin OS=Rattus norvegicus GN=Alb PE=1 SV=2	sp|P02770|ALBU_RAT	lcVLHEk	-0.01185	0.2097
Serum albumin OS=Rattus norvegicus GN=Alb PE=1 SV=2	sp|P02770|ALBU_RAT	lGEYGFQNAVLVR	0.04929	0.2336
Serum albumin OS=Rattus norvegicus GN=Alb PE=1 SV=2	sp|P02770|ALBU_RAT	lPcVEDYLSAILNR	0.2309	0.1526
Serum albumin OS=Rattus norvegicus GN=Alb PE=1 SV=2	sp|P02770|ALBU_RAT	lQAccDkPVLQk	-0.1577	0.4046
Serum albumin OS=Rattus norvegicus GN=Alb PE=1 SV=2	sp|P02770|ALBU_RAT	lRDNYGELADccAk	-0.04061	0.4154
Serum albumin OS=Rattus norvegicus GN=Alb PE=1 SV=2	sp|P02770|ALBU_RAT	lRDNyGELADccAk	-0.1016	0.4632
Serum albumin OS=Rattus norvegicus GN=Alb PE=1 SV=2	sp|P02770|ALBU_RAT	lVQEVTDFAk	-0.1191	0.3781
Serum albumin OS=Rattus norvegicus GN=Alb PE=1 SV=2	sp|P02770|ALBU_RAT	mSQRFPNAEFAEITk	-0.2457	-0.3337
Serum albumin OS=Rattus norvegicus GN=Alb PE=1 SV=2	sp|P02770|ALBU_RAT	nEcFLQHk	0.07839	0.3026
Serum albumin OS=Rattus norvegicus GN=Alb PE=1 SV=2	sp|P02770|ALBU_RAT	qEPERNEcFLQHk	-0.07106	0.2707
Serum albumin OS=Rattus norvegicus GN=Alb PE=1 SV=2	sp|P02770|ALBU_RAT	qTALAELVk	-0.1609	0.2616
Serum albumin OS=Rattus norvegicus GN=Alb PE=1 SV=2	sp|P02770|ALBU_RAT	rHPYFYAPELLYYAEk	0.07532	0.4206
Serum albumin OS=Rattus norvegicus GN=Alb PE=1 SV=2	sp|P02770|ALBU_RAT	rPcFSALTVDETYVPk	0.104	0.2575
Serum albumin OS=Rattus norvegicus GN=Alb PE=1 SV=2	sp|P02770|ALBU_RAT	sIHTLFGDk	-0.1325	0.1424
Serum albumin OS=Rattus norvegicus GN=Alb PE=1 SV=2	sp|P02770|ALBU_RAT	tcVADENAENcDk	0.1064	0.6788
Serum albumin OS=Rattus norvegicus GN=Alb PE=1 SV=2	sp|P02770|ALBU_RAT	tNcELYEk	0.1557	0.2212
Serum albumin OS=Rattus norvegicus GN=Alb PE=1 SV=2	sp|P02770|ALBU_RAT	tNcELyEk	0.118	0.4509
Serum albumin OS=Rattus norvegicus GN=Alb PE=1 SV=2	sp|P02770|ALBU_RAT	tVMGDFAQFVDk	0.08265	0.3065
Serum albumin OS=Rattus norvegicus GN=Alb PE=1 SV=2	sp|P02770|ALBU_RAT	yEATLEk	-0.1809	0.1118
Serum albumin OS=Rattus norvegicus GN=Alb PE=1 SV=2	sp|P02770|ALBU_RAT	yMcENQATISSk	0.1688	0.3248
Serum albumin OS=Rattus norvegicus GN=Alb PE=1 SV=2	sp|P02770|ALBU_RAT	yMcENQATISSk	0.1066	0.1495
Serum albumin OS=Rattus norvegicus GN=Alb PE=1 SV=2	sp|P02770|ALBU_RAT	yNEVLTQccTESDk	0.233	0.1619
Serum albumin OS=Rattus norvegicus GN=Alb PE=1 SV=2	sp|P02770|ALBU_RAT	yNEVLTQccTESDk	0.2731	0.3623
Serum albumin OS=Rattus norvegicus GN=Alb PE=1 SV=2	sp|P02770|ALBU_RAT	yNEVLTQccTESDkAAcLTPk	-0.6796	0.3703
Aldehyde dehydrogenase, mitochondrial OS=Rattus norvegicus GN=Aldh2 PE=1 SV=1	sp|P11884|ALDH2_RAT	dGMTIAk	-0.08865	0.184
Aldehyde dehydrogenase, mitochondrial OS=Rattus norvegicus GN=Aldh2 PE=1 SV=1	sp|P11884|ALDH2_RAT	eEIFGPVMQILk	-0.05228	0.2247
Aldehyde dehydrogenase, mitochondrial OS=Rattus norvegicus GN=Aldh2 PE=1 SV=1	sp|P11884|ALDH2_RAT	eLGEYGLQAYTEVk	0.1881	-0.01693
Aldehyde dehydrogenase, mitochondrial OS=Rattus norvegicus GN=Aldh2 PE=1 SV=1	sp|P11884|ALDH2_RAT	eLGEYGLQAyTEVk	0.2811	0.1877
Aldehyde dehydrogenase, mitochondrial OS=Rattus norvegicus GN=Aldh2 PE=1 SV=1	sp|P11884|ALDH2_RAT	gYFIQPTVFGDVk	0.03785	0.145
Aldehyde dehydrogenase, mitochondrial OS=Rattus norvegicus GN=Aldh2 PE=1 SV=1	sp|P11884|ALDH2_RAT	hEPVGVcGQIIPWNFPLLMQAWk	-0.06755	0.06065
Aldehyde dehydrogenase, mitochondrial OS=Rattus norvegicus GN=Aldh2 PE=1 SV=1	sp|P11884|ALDH2_RAT	kTFPTVNPSTGEVIcQVAEGNk	0.3233	-0.03107
Aldehyde dehydrogenase, mitochondrial OS=Rattus norvegicus GN=Aldh2 PE=1 SV=1	sp|P11884|ALDH2_RAT	kTFPTVNPSTGEVIcQVAEGNkEDVDk	0.1945	0.2673
Aldehyde dehydrogenase, mitochondrial OS=Rattus norvegicus GN=Aldh2 PE=1 SV=1	sp|P11884|ALDH2_RAT	lADLIER	-0.1924	-0.07285
Aldehyde dehydrogenase, mitochondrial OS=Rattus norvegicus GN=Aldh2 PE=1 SV=1	sp|P11884|ALDH2_RAT	lGPALATGNVVVMk	-0.1402	0.183
Aldehyde dehydrogenase, mitochondrial OS=Rattus norvegicus GN=Aldh2 PE=1 SV=1	sp|P11884|ALDH2_RAT	lLcGGGAAADR	-0.06365	-0.07174
Aldehyde dehydrogenase, mitochondrial OS=Rattus norvegicus GN=Aldh2 PE=1 SV=1	sp|P11884|ALDH2_RAT	rMDASDR	0.114	-0.1556
Aldehyde dehydrogenase, mitochondrial OS=Rattus norvegicus GN=Aldh2 PE=1 SV=1	sp|P11884|ALDH2_RAT	sGQQEGAk	0.5563	0.7444
Aldehyde dehydrogenase, mitochondrial OS=Rattus norvegicus GN=Aldh2 PE=1 SV=1	sp|P11884|ALDH2_RAT	tEQGPQVDETQFk	-0.06175	0.1474
Aldehyde dehydrogenase, mitochondrial OS=Rattus norvegicus GN=Aldh2 PE=1 SV=1	sp|P11884|ALDH2_RAT	tEQGPQVDETQFkk	-0.5427	0.1456
Aldehyde dehydrogenase, mitochondrial OS=Rattus norvegicus GN=Aldh2 PE=1 SV=1	sp|P11884|ALDH2_RAT	tFPTVNPSTGEVIcQVAEGNk	0.198	-0.03371
Aldehyde dehydrogenase, mitochondrial OS=Rattus norvegicus GN=Aldh2 PE=1 SV=1	sp|P11884|ALDH2_RAT	tFPTVNPSTGEVIcQVAEGNkEDVDk	0.2341	0.09918
Aldehyde dehydrogenase, mitochondrial OS=Rattus norvegicus GN=Aldh2 PE=1 SV=1	sp|P11884|ALDH2_RAT	tFVQEDVYDEFVER	0.2667	-0.1265
Aldehyde dehydrogenase, mitochondrial OS=Rattus norvegicus GN=Aldh2 PE=1 SV=1	sp|P11884|ALDH2_RAT	tFVQEDVyDEFVER	0.3871	0.08555
Aldehyde dehydrogenase, mitochondrial OS=Rattus norvegicus GN=Aldh2 PE=1 SV=1	sp|P11884|ALDH2_RAT	tIEEVVGR	-0.01498	-0.1076
Aldehyde dehydrogenase, mitochondrial OS=Rattus norvegicus GN=Aldh2 PE=1 SV=1	sp|P11884|ALDH2_RAT	tIPIDGDFFSYTR	0.09029	-0.01408
Aldehyde dehydrogenase, mitochondrial OS=Rattus norvegicus GN=Aldh2 PE=1 SV=1	sp|P11884|ALDH2_RAT	tIPIDGDFFSyTR	-0.08889	0.1622
Aldehyde dehydrogenase, mitochondrial OS=Rattus norvegicus GN=Aldh2 PE=1 SV=1	sp|P11884|ALDH2_RAT	vAEQTPLTALYVANLIk	-0.07565	0.1319
Aldehyde dehydrogenase, mitochondrial OS=Rattus norvegicus GN=Aldh2 PE=1 SV=1	sp|P11884|ALDH2_RAT	vAEQTPLTALyVANLIk	-0.3189	0.1508
Aldehyde dehydrogenase, mitochondrial OS=Rattus norvegicus GN=Aldh2 PE=1 SV=1	sp|P11884|ALDH2_RAT	vAFTGSTEVGHLIQVAAGSSNLk	-0.02178	0.1064
Aldehyde dehydrogenase, mitochondrial OS=Rattus norvegicus GN=Aldh2 PE=1 SV=1	sp|P11884|ALDH2_RAT	vVGNPFDSR	-0.07469	0.07191
Aldehyde dehydrogenase, mitochondrial OS=Rattus norvegicus GN=Aldh2 PE=1 SV=1	sp|P11884|ALDH2_RAT	yGLAAAVFTk	0.006416	0.009306
Stress-70 protein, mitochondrial OS=Rattus norvegicus GN=Hspa9 PE=1 SV=3	sp|P48721|GRP75_RAT	aQFEGIVTDLIk	0.02508	0.094
Stress-70 protein, mitochondrial OS=Rattus norvegicus GN=Hspa9 PE=1 SV=3	sp|P48721|GRP75_RAT	aQFEGIVTDLIkR	-0.01017	-0.07993
Stress-70 protein, mitochondrial OS=Rattus norvegicus GN=Hspa9 PE=1 SV=3	sp|P48721|GRP75_RAT	aSNGDAWVEAHGk	0.169	0.09385
Stress-70 protein, mitochondrial OS=Rattus norvegicus GN=Hspa9 PE=1 SV=3	sp|P48721|GRP75_RAT	aVNPDEAVAIGAAIQGGVLAGDVTDVLLLDVTPLSLGIETLGGVFTk	-6.644	0.8467
Stress-70 protein, mitochondrial OS=Rattus norvegicus GN=Hspa9 PE=1 SV=3	sp|P48721|GRP75_RAT	cELSSSVQTDINLPYLTMDASGPk	0.4593	0.06877
Stress-70 protein, mitochondrial OS=Rattus norvegicus GN=Hspa9 PE=1 SV=3	sp|P48721|GRP75_RAT	cELSSSVQTDINLPyLTMDASGPk	0.1421	0.1242
Stress-70 protein, mitochondrial OS=Rattus norvegicus GN=Hspa9 PE=1 SV=3	sp|P48721|GRP75_RAT	dAGQISGLNVLR	-0.04099	-0.03784
Stress-70 protein, mitochondrial OS=Rattus norvegicus GN=Hspa9 PE=1 SV=3	sp|P48721|GRP75_RAT	dDIENMVk	0.07932	-0.01959
Stress-70 protein, mitochondrial OS=Rattus norvegicus GN=Hspa9 PE=1 SV=3	sp|P48721|GRP75_RAT	dNMALQR	0.05486	-0.1805
Stress-70 protein, mitochondrial OS=Rattus norvegicus GN=Hspa9 PE=1 SV=3	sp|P48721|GRP75_RAT	dQLPADEcNk	0.2862	0.2613
Stress-70 protein, mitochondrial OS=Rattus norvegicus GN=Hspa9 PE=1 SV=3	sp|P48721|GRP75_RAT	eMAGDNk	0.1325	0.2752
Stress-70 protein, mitochondrial OS=Rattus norvegicus GN=Hspa9 PE=1 SV=3	sp|P48721|GRP75_RAT	eQQIVIQSSGGLSk	0.2521	-0.0636
Stress-70 protein, mitochondrial OS=Rattus norvegicus GN=Hspa9 PE=1 SV=3	sp|P48721|GRP75_RAT	eQQIVIQSSGGLSkDDIENMVk	0.06479	0.09634
Stress-70 protein, mitochondrial OS=Rattus norvegicus GN=Hspa9 PE=1 SV=3	sp|P48721|GRP75_RAT	eTAENYLGHTAk	0.05252	0.04226
Stress-70 protein, mitochondrial OS=Rattus norvegicus GN=Hspa9 PE=1 SV=3	sp|P48721|GRP75_RAT	eTAENyLGHTAk	0.2635	0.01241
Stress-70 protein, mitochondrial OS=Rattus norvegicus GN=Hspa9 PE=1 SV=3	sp|P48721|GRP75_RAT	eTGVDLTk	-0.08152	0.1038
Stress-70 protein, mitochondrial OS=Rattus norvegicus GN=Hspa9 PE=1 SV=3	sp|P48721|GRP75_RAT	eTGVDLTkDNMALQR	-0.05894	-0.2834
Stress-70 protein, mitochondrial OS=Rattus norvegicus GN=Hspa9 PE=1 SV=3	sp|P48721|GRP75_RAT	gAVVGIDLGTTNScVAVMEGk	0.1865	0.09288
Stress-70 protein, mitochondrial OS=Rattus norvegicus GN=Hspa9 PE=1 SV=3	sp|P48721|GRP75_RAT	kDSETGENIR	0.2313	0.5261
Stress-70 protein, mitochondrial OS=Rattus norvegicus GN=Hspa9 PE=1 SV=3	sp|P48721|GRP75_RAT	kSQVFSTAADGQTQVEIk	0.1537	0.1524
Stress-70 protein, mitochondrial OS=Rattus norvegicus GN=Hspa9 PE=1 SV=3	sp|P48721|GRP75_RAT	lFEMAYk	0.0388	0.2079
Stress-70 protein, mitochondrial OS=Rattus norvegicus GN=Hspa9 PE=1 SV=3	sp|P48721|GRP75_RAT	lLGQFTLIGIPPAPR	-0.07275	0.09041
Stress-70 protein, mitochondrial OS=Rattus norvegicus GN=Hspa9 PE=1 SV=3	sp|P48721|GRP75_RAT	lVGMPAk	0.008885	0.03223
Stress-70 protein, mitochondrial OS=Rattus norvegicus GN=Hspa9 PE=1 SV=3	sp|P48721|GRP75_RAT	lYSPSQIGAFVLMk	0.1369	0.3223
Stress-70 protein, mitochondrial OS=Rattus norvegicus GN=Hspa9 PE=1 SV=3	sp|P48721|GRP75_RAT	mEEFkDQLPADEcNk	0.03872	0.04808
Stress-70 protein, mitochondrial OS=Rattus norvegicus GN=Hspa9 PE=1 SV=3	sp|P48721|GRP75_RAT	mkETAENYLGHTAk	0.01772	0.3223
Stress-70 protein, mitochondrial OS=Rattus norvegicus GN=Hspa9 PE=1 SV=3	sp|P48721|GRP75_RAT	nAVITVPAYFNDSQR	0.05597	0.1219
Stress-70 protein, mitochondrial OS=Rattus norvegicus GN=Hspa9 PE=1 SV=3	sp|P48721|GRP75_RAT	nAVITVPAyFNDSQR	0.2162	0.1099
Stress-70 protein, mitochondrial OS=Rattus norvegicus GN=Hspa9 PE=1 SV=3	sp|P48721|GRP75_RAT	nTTIPTkk	-0.2095	0.1916
Stress-70 protein, mitochondrial OS=Rattus norvegicus GN=Hspa9 PE=1 SV=3	sp|P48721|GRP75_RAT	qAASSLQQASLk	0.01384	0.005416
Stress-70 protein, mitochondrial OS=Rattus norvegicus GN=Hspa9 PE=1 SV=3	sp|P48721|GRP75_RAT	qAVTNPNNTFYATk	0.07191	-0.0001824
Stress-70 protein, mitochondrial OS=Rattus norvegicus GN=Hspa9 PE=1 SV=3	sp|P48721|GRP75_RAT	rYDDPEVQk	0.08233	0.07291
Stress-70 protein, mitochondrial OS=Rattus norvegicus GN=Hspa9 PE=1 SV=3	sp|P48721|GRP75_RAT	rYDDPEVQkDTk	-0.1224	-0.1912
Stress-70 protein, mitochondrial OS=Rattus norvegicus GN=Hspa9 PE=1 SV=3	sp|P48721|GRP75_RAT	sDIGEVILVGGMTR	0.1488	0.1435
Stress-70 protein, mitochondrial OS=Rattus norvegicus GN=Hspa9 PE=1 SV=3	sp|P48721|GRP75_RAT	sQVFSTAADGQTQVEIk	0.1846	0.1454
Stress-70 protein, mitochondrial OS=Rattus norvegicus GN=Hspa9 PE=1 SV=3	sp|P48721|GRP75_RAT	sTNGDTFLGGEDFDQALLR	0.3538	0.04643
Stress-70 protein, mitochondrial OS=Rattus norvegicus GN=Hspa9 PE=1 SV=3	sp|P48721|GRP75_RAT	tIAPcQk	-0.2192	-0.1868
Stress-70 protein, mitochondrial OS=Rattus norvegicus GN=Hspa9 PE=1 SV=3	sp|P48721|GRP75_RAT	tTPSVVAFTPDGER	0.09386	0.04493
Stress-70 protein, mitochondrial OS=Rattus norvegicus GN=Hspa9 PE=1 SV=3	sp|P48721|GRP75_RAT	vEAVNMAEGIIHDTETk	0.07919	-0.1854
Stress-70 protein, mitochondrial OS=Rattus norvegicus GN=Hspa9 PE=1 SV=3	sp|P48721|GRP75_RAT	vINEPTAAALAYGLDk	0.09599	0.1789
Stress-70 protein, mitochondrial OS=Rattus norvegicus GN=Hspa9 PE=1 SV=3	sp|P48721|GRP75_RAT	vINEPTAAALAyGLDk	0.06065	-0.07041
Stress-70 protein, mitochondrial OS=Rattus norvegicus GN=Hspa9 PE=1 SV=3	sp|P48721|GRP75_RAT	vINEPTAAALAYGLDkSEDk	-0.0617	-0.2808
Stress-70 protein, mitochondrial OS=Rattus norvegicus GN=Hspa9 PE=1 SV=3	sp|P48721|GRP75_RAT	vLENAEGAR	-0.1107	0.02994
Stress-70 protein, mitochondrial OS=Rattus norvegicus GN=Hspa9 PE=1 SV=3	sp|P48721|GRP75_RAT	vQQTVQDLFGR	-0.03304	0.09778
Stress-70 protein, mitochondrial OS=Rattus norvegicus GN=Hspa9 PE=1 SV=3	sp|P48721|GRP75_RAT	yDDPEVQk	0.4938	0.08688
Long-chain-fatty-acid--CoA ligase 1 OS=Rattus norvegicus GN=Acsl1 PE=1 SV=1	sp|P18163|ACSL1_RAT	aELSVIFADkPEk	0.1353	0.08594
Long-chain-fatty-acid--CoA ligase 1 OS=Rattus norvegicus GN=Acsl1 PE=1 SV=1	sp|P18163|ACSL1_RAT	aILEDMVk	-0.1134	0.03379
Long-chain-fatty-acid--CoA ligase 1 OS=Rattus norvegicus GN=Acsl1 PE=1 SV=1	sp|P18163|ACSL1_RAT	aLEDLGR	-0.01327	-0.05866
Long-chain-fatty-acid--CoA ligase 1 OS=Rattus norvegicus GN=Acsl1 PE=1 SV=1	sp|P18163|ACSL1_RAT	aLkPPcDLSMQSVEVTGTTEGVR	0.166	-0.03626
Long-chain-fatty-acid--CoA ligase 1 OS=Rattus norvegicus GN=Acsl1 PE=1 SV=1	sp|P18163|ACSL1_RAT	aLkPPcDLSMQSVEVTGTTEGVRR	-1.066	-0.3942
Long-chain-fatty-acid--CoA ligase 1 OS=Rattus norvegicus GN=Acsl1 PE=1 SV=1	sp|P18163|ACSL1_RAT	cGVEIIGLk	-0.1557	-0.07375
Long-chain-fatty-acid--CoA ligase 1 OS=Rattus norvegicus GN=Acsl1 PE=1 SV=1	sp|P18163|ACSL1_RAT	dGWLHTGDIGk	0.3449	-0.07257
Long-chain-fatty-acid--CoA ligase 1 OS=Rattus norvegicus GN=Acsl1 PE=1 SV=1	sp|P18163|ACSL1_RAT	gAMVTHQNIMNDcSGFIk	0.08381	-0.1068
Long-chain-fatty-acid--CoA ligase 1 OS=Rattus norvegicus GN=Acsl1 PE=1 SV=1	sp|P18163|ACSL1_RAT	gEGEVcVk	0.07932	0.1534
Long-chain-fatty-acid--CoA ligase 1 OS=Rattus norvegicus GN=Acsl1 PE=1 SV=1	sp|P18163|ACSL1_RAT	gFQGSFEELcR	-0.07131	-0.2457
Long-chain-fatty-acid--CoA ligase 1 OS=Rattus norvegicus GN=Acsl1 PE=1 SV=1	sp|P18163|ACSL1_RAT	gIAVHPELFSIDNGLLTPTLk	-0.1049	-0.1065
Long-chain-fatty-acid--CoA ligase 1 OS=Rattus norvegicus GN=Acsl1 PE=1 SV=1	sp|P18163|ACSL1_RAT	gIQVSNDGPcLGSR	-0.2083	-0.2392
Long-chain-fatty-acid--CoA ligase 1 OS=Rattus norvegicus GN=Acsl1 PE=1 SV=1	sp|P18163|ACSL1_RAT	gYLkDPAR	-0.1066	-0.1577
Long-chain-fatty-acid--CoA ligase 1 OS=Rattus norvegicus GN=Acsl1 PE=1 SV=1	sp|P18163|ACSL1_RAT	iFGQANTSVk	-0.142	-0.05631
Long-chain-fatty-acid--CoA ligase 1 OS=Rattus norvegicus GN=Acsl1 PE=1 SV=1	sp|P18163|ACSL1_RAT	iIVIMDSYDNDLVER	0.02904	-0.2079
Long-chain-fatty-acid--CoA ligase 1 OS=Rattus norvegicus GN=Acsl1 PE=1 SV=1	sp|P18163|ACSL1_RAT	iIVIMDSyDNDLVER	-0.01123	-0.2579
Long-chain-fatty-acid--CoA ligase 1 OS=Rattus norvegicus GN=Acsl1 PE=1 SV=1	sp|P18163|ACSL1_RAT	kPNQPYEWISYk	0.2508	-0.106
Long-chain-fatty-acid--CoA ligase 1 OS=Rattus norvegicus GN=Acsl1 PE=1 SV=1	sp|P18163|ACSL1_RAT	kPNQPyEWISYk	0.1257	-0.3275
Long-chain-fatty-acid--CoA ligase 1 OS=Rattus norvegicus GN=Acsl1 PE=1 SV=1	sp|P18163|ACSL1_RAT	kPNQPYEWISyk	0.1418	-0.2811
Long-chain-fatty-acid--CoA ligase 1 OS=Rattus norvegicus GN=Acsl1 PE=1 SV=1	sp|P18163|ACSL1_RAT	lAQGEYIAPEkIENIYLR	-0.4474	-0.8565
Long-chain-fatty-acid--CoA ligase 1 OS=Rattus norvegicus GN=Acsl1 PE=1 SV=1	sp|P18163|ACSL1_RAT	lLLEGVENk	-0.03212	0.06475
Long-chain-fatty-acid--CoA ligase 1 OS=Rattus norvegicus GN=Acsl1 PE=1 SV=1	sp|P18163|ACSL1_RAT	lLLEGVENkLTPcLk	0.01347	-0.386
Long-chain-fatty-acid--CoA ligase 1 OS=Rattus norvegicus GN=Acsl1 PE=1 SV=1	sp|P18163|ACSL1_RAT	lLLYYYDDVR	-0.1791	-0.1693
Long-chain-fatty-acid--CoA ligase 1 OS=Rattus norvegicus GN=Acsl1 PE=1 SV=1	sp|P18163|ACSL1_RAT	lLMDDLk	0.01931	0.0684
Long-chain-fatty-acid--CoA ligase 1 OS=Rattus norvegicus GN=Acsl1 PE=1 SV=1	sp|P18163|ACSL1_RAT	lMITGAAPVSATVLTFLR	-0.2389	0.1132
Long-chain-fatty-acid--CoA ligase 1 OS=Rattus norvegicus GN=Acsl1 PE=1 SV=1	sp|P18163|ACSL1_RAT	lVDVEDMNYQAAk	0.03164	-0.1594
Long-chain-fatty-acid--CoA ligase 1 OS=Rattus norvegicus GN=Acsl1 PE=1 SV=1	sp|P18163|ACSL1_RAT	lVDVEDMNyQAAk	-0.9231	0.3514
Long-chain-fatty-acid--CoA ligase 1 OS=Rattus norvegicus GN=Acsl1 PE=1 SV=1	sp|P18163|ACSL1_RAT	mEVHELFR	0.238	0.0682
Long-chain-fatty-acid--CoA ligase 1 OS=Rattus norvegicus GN=Acsl1 PE=1 SV=1	sp|P18163|ACSL1_RAT	mPELIDIR	-0.1377	-0.07887
Long-chain-fatty-acid--CoA ligase 1 OS=Rattus norvegicus GN=Acsl1 PE=1 SV=1	sp|P18163|ACSL1_RAT	nAGLkPFEQVk	-0.1096	-0.02562
Long-chain-fatty-acid--CoA ligase 1 OS=Rattus norvegicus GN=Acsl1 PE=1 SV=1	sp|P18163|ACSL1_RAT	nNSLWDk	0.172	-0.07595
Long-chain-fatty-acid--CoA ligase 1 OS=Rattus norvegicus GN=Acsl1 PE=1 SV=1	sp|P18163|ACSL1_RAT	qVAEMAEcIGSALIQk	-0.2402	-0.2322
Long-chain-fatty-acid--CoA ligase 1 OS=Rattus norvegicus GN=Acsl1 PE=1 SV=1	sp|P18163|ACSL1_RAT	rGFQGSFEELcR	-0.3201	-0.07286
Long-chain-fatty-acid--CoA ligase 1 OS=Rattus norvegicus GN=Acsl1 PE=1 SV=1	sp|P18163|ACSL1_RAT	sAVLEDDk	0.182	0.3359
Long-chain-fatty-acid--CoA ligase 1 OS=Rattus norvegicus GN=Acsl1 PE=1 SV=1	sp|P18163|ACSL1_RAT	sAVLEDDkLLLYYYDDVR	0.6277	-0.3813
Long-chain-fatty-acid--CoA ligase 1 OS=Rattus norvegicus GN=Acsl1 PE=1 SV=1	sp|P18163|ACSL1_RAT	sAVLEDDkLLLyYYDDVR	0.6414	-0.375
Long-chain-fatty-acid--CoA ligase 1 OS=Rattus norvegicus GN=Acsl1 PE=1 SV=1	sp|P18163|ACSL1_RAT	sQIDELYSTIk	0.1165	0.07324
Long-chain-fatty-acid--CoA ligase 1 OS=Rattus norvegicus GN=Acsl1 PE=1 SV=1	sp|P18163|ACSL1_RAT	sQIDELySTIk	0.006147	-0.1437
Long-chain-fatty-acid--CoA ligase 1 OS=Rattus norvegicus GN=Acsl1 PE=1 SV=1	sp|P18163|ACSL1_RAT	sQIDELYSTIkI	-0.4673	-0.2273
Long-chain-fatty-acid--CoA ligase 1 OS=Rattus norvegicus GN=Acsl1 PE=1 SV=1	sp|P18163|ACSL1_RAT	sQIDELySTIkI	-0.8548	-0.1314
Long-chain-fatty-acid--CoA ligase 1 OS=Rattus norvegicus GN=Acsl1 PE=1 SV=1	sp|P18163|ACSL1_RAT	tAEALDk	0.7474	0.4075
Long-chain-fatty-acid--CoA ligase 1 OS=Rattus norvegicus GN=Acsl1 PE=1 SV=1	sp|P18163|ACSL1_RAT	tAEALDkDGWLHTGDIGk	0.05968	-0.0202
Long-chain-fatty-acid--CoA ligase 1 OS=Rattus norvegicus GN=Acsl1 PE=1 SV=1	sp|P18163|ACSL1_RAT	tkPkPPEPEDLAIIcFTSGTTGNPk	0.2768	-0.1278
Long-chain-fatty-acid--CoA ligase 1 OS=Rattus norvegicus GN=Acsl1 PE=1 SV=1	sp|P18163|ACSL1_RAT	tMYDGFQR	0.05943	-0.1286
Long-chain-fatty-acid--CoA ligase 1 OS=Rattus norvegicus GN=Acsl1 PE=1 SV=1	sp|P18163|ACSL1_RAT	vLQPTIFPVVPR	-0.1611	-0.1686
Long-chain-fatty-acid--CoA ligase 1 OS=Rattus norvegicus GN=Acsl1 PE=1 SV=1	sp|P18163|ACSL1_RAT	wLLDFASk	-0.09821	-0.09832
Myosin-9 OS=Rattus norvegicus GN=Myh9 PE=1 SV=3	sp|Q62812|MYH9_RAT	aLEEAMEQk	0.117	-0.1393
Myosin-9 OS=Rattus norvegicus GN=Myh9 PE=1 SV=3	sp|Q62812|MYH9_RAT	aLELDSNLYR	0.02181	-0.1174
Myosin-9 OS=Rattus norvegicus GN=Myh9 PE=1 SV=3	sp|Q62812|MYH9_RAT	aLEQQVEEMk	0.172	-0.1728
Myosin-9 OS=Rattus norvegicus GN=Myh9 PE=1 SV=3	sp|Q62812|MYH9_RAT	aNLQIDQINTDLNLER	0.05785	-0.226
Myosin-9 OS=Rattus norvegicus GN=Myh9 PE=1 SV=3	sp|Q62812|MYH9_RAT	aSIAALEAk	-0.01463	-0.1926
Myosin-9 OS=Rattus norvegicus GN=Myh9 PE=1 SV=3	sp|Q62812|MYH9_RAT	aSREEILAQAk	-0.4968	-0.3387
Myosin-9 OS=Rattus norvegicus GN=Myh9 PE=1 SV=3	sp|Q62812|MYH9_RAT	cQYLQAEk	0.03505	-0.2942
Myosin-9 OS=Rattus norvegicus GN=Myh9 PE=1 SV=3	sp|Q62812|MYH9_RAT	dELADEIANSSGk	0.136	-0.1796
Myosin-9 OS=Rattus norvegicus GN=Myh9 PE=1 SV=3	sp|Q62812|MYH9_RAT	dFSALESQLQDTQELLQEENR	0.3615	-0.3853
Myosin-9 OS=Rattus norvegicus GN=Myh9 PE=1 SV=3	sp|Q62812|MYH9_RAT	dLEAHIDTANk	0.001918	-0.09403
Myosin-9 OS=Rattus norvegicus GN=Myh9 PE=1 SV=3	sp|Q62812|MYH9_RAT	dLEGLSQR	-0.003758	-0.314
Myosin-9 OS=Rattus norvegicus GN=Myh9 PE=1 SV=3	sp|Q62812|MYH9_RAT	dLGEELEALk	0.4733	-0.1211
Myosin-9 OS=Rattus norvegicus GN=Myh9 PE=1 SV=3	sp|Q62812|MYH9_RAT	dLGEELEALkTELEDTLDSTAAQQELR	0.4423	-0.4726
Myosin-9 OS=Rattus norvegicus GN=Myh9 PE=1 SV=3	sp|Q62812|MYH9_RAT	dMFQETMEAMR	0.5429	-0.1668
Myosin-9 OS=Rattus norvegicus GN=Myh9 PE=1 SV=3	sp|Q62812|MYH9_RAT	dVLLQVEDER	-0.01877	-0.5081
Myosin-9 OS=Rattus norvegicus GN=Myh9 PE=1 SV=3	sp|Q62812|MYH9_RAT	dVLLQVEDERR	-0.05341	-0.2192
Myosin-9 OS=Rattus norvegicus GN=Myh9 PE=1 SV=3	sp|Q62812|MYH9_RAT	eEELQAALAR	-0.2347	-0.3402
Myosin-9 OS=Rattus norvegicus GN=Myh9 PE=1 SV=3	sp|Q62812|MYH9_RAT	eEVGEEAIVELVENGk	0.3793	-0.3607
Myosin-9 OS=Rattus norvegicus GN=Myh9 PE=1 SV=3	sp|Q62812|MYH9_RAT	eEVGEEAIVELVENGkk	0.08096	-0.4774
Myosin-9 OS=Rattus norvegicus GN=Myh9 PE=1 SV=3	sp|Q62812|MYH9_RAT	eLEDATETADAMNR	0.2065	-0.3111
Myosin-9 OS=Rattus norvegicus GN=Myh9 PE=1 SV=3	sp|Q62812|MYH9_RAT	eLETQISELQEDLESER	0.2344	-0.3899
Myosin-9 OS=Rattus norvegicus GN=Myh9 PE=1 SV=3	sp|Q62812|MYH9_RAT	eMEAELEDERk	-0.05546	-0.02825
Myosin-9 OS=Rattus norvegicus GN=Myh9 PE=1 SV=3	sp|Q62812|MYH9_RAT	eQEVSILk	0.03161	-0.1312
Myosin-9 OS=Rattus norvegicus GN=Myh9 PE=1 SV=3	sp|Q62812|MYH9_RAT	fLSNGHVTIPGQQDk	0.5429	-0.1708
Myosin-9 OS=Rattus norvegicus GN=Myh9 PE=1 SV=3	sp|Q62812|MYH9_RAT	gALALEEk	0.00519	-0.1978
Myosin-9 OS=Rattus norvegicus GN=Myh9 PE=1 SV=3	sp|Q62812|MYH9_RAT	gELANEVk	0.2499	-0.07938
Myosin-9 OS=Rattus norvegicus GN=Myh9 PE=1 SV=3	sp|Q62812|MYH9_RAT	hEAMITDLEER	0.09601	-0.4037
Myosin-9 OS=Rattus norvegicus GN=Myh9 PE=1 SV=3	sp|Q62812|MYH9_RAT	hEDELLAk	0.07844	-0.0959
Myosin-9 OS=Rattus norvegicus GN=Myh9 PE=1 SV=3	sp|Q62812|MYH9_RAT	hEMPPHIYAITDTAYR	-0.1945	-0.2439
Myosin-9 OS=Rattus norvegicus GN=Myh9 PE=1 SV=3	sp|Q62812|MYH9_RAT	hLAAENR	-0.2225	-0.1982
Myosin-9 OS=Rattus norvegicus GN=Myh9 PE=1 SV=3	sp|Q62812|MYH9_RAT	hSQAVEELAEQLEQTk	0.2133	-0.3964
Myosin-9 OS=Rattus norvegicus GN=Myh9 PE=1 SV=3	sp|Q62812|MYH9_RAT	hSQAVEELAEQLEQTkR	0.09179	-0.1052
Myosin-9 OS=Rattus norvegicus GN=Myh9 PE=1 SV=3	sp|Q62812|MYH9_RAT	iAQLEEQLDNETk	0.1914	-0.236
Myosin-9 OS=Rattus norvegicus GN=Myh9 PE=1 SV=3	sp|Q62812|MYH9_RAT	iIGLDQVAGMSETALPGAFk	-0.06549	-0.2515
Myosin-9 OS=Rattus norvegicus GN=Myh9 PE=1 SV=3	sp|Q62812|MYH9_RAT	iMGIPEDEQMGLLR	0.1056	-0.1183
Myosin-9 OS=Rattus norvegicus GN=Myh9 PE=1 SV=3	sp|Q62812|MYH9_RAT	kANLQIDQINTDLNLER	-0.1936	-0.1857
Myosin-9 OS=Rattus norvegicus GN=Myh9 PE=1 SV=3	sp|Q62812|MYH9_RAT	kkVEAQLQELQVk	0.03635	-0.08035
Myosin-9 OS=Rattus norvegicus GN=Myh9 PE=1 SV=3	sp|Q62812|MYH9_RAT	kLEEDQIIMEDQNck	0.2537	-0.2308
Myosin-9 OS=Rattus norvegicus GN=Myh9 PE=1 SV=3	sp|Q62812|MYH9_RAT	kLEGDSTDLSDQIAELQAQIAELk	0.6071	-0.054
Myosin-9 OS=Rattus norvegicus GN=Myh9 PE=1 SV=3	sp|Q62812|MYH9_RAT	kLEMDLk	0.2668	-0.1387
Myosin-9 OS=Rattus norvegicus GN=Myh9 PE=1 SV=3	sp|Q62812|MYH9_RAT	kMEDGVGcLETAEEAk	0.1298	-0.1446
Myosin-9 OS=Rattus norvegicus GN=Myh9 PE=1 SV=3	sp|Q62812|MYH9_RAT	kQELEEIcHDLEAR	0.07227	-0.1606
Myosin-9 OS=Rattus norvegicus GN=Myh9 PE=1 SV=3	sp|Q62812|MYH9_RAT	kVEAQLQELQVk	0.1259	-0.2235
Myosin-9 OS=Rattus norvegicus GN=Myh9 PE=1 SV=3	sp|Q62812|MYH9_RAT	lEEDQIIMEDQNck	0.2183	-0.1864
Myosin-9 OS=Rattus norvegicus GN=Myh9 PE=1 SV=3	sp|Q62812|MYH9_RAT	lEGDSTDLSDQIAELQAQIAELk	-0.1705	0.4119
Myosin-9 OS=Rattus norvegicus GN=Myh9 PE=1 SV=3	sp|Q62812|MYH9_RAT	lEVNLQAMk	0.02163	-0.1318
Myosin-9 OS=Rattus norvegicus GN=Myh9 PE=1 SV=3	sp|Q62812|MYH9_RAT	lkDVLLQVEDER	0.3222	-0.2619
Myosin-9 OS=Rattus norvegicus GN=Myh9 PE=1 SV=3	sp|Q62812|MYH9_RAT	lkDVLLQVEDERR	0.02729	-0.303
Myosin-9 OS=Rattus norvegicus GN=Myh9 PE=1 SV=3	sp|Q62812|MYH9_RAT	lQQELDDLLVDLDHQR	0.6413	-0.6012
Myosin-9 OS=Rattus norvegicus GN=Myh9 PE=1 SV=3	sp|Q62812|MYH9_RAT	lQVELDSVTGLLNQSDSk	0.06937	-0.1186
Myosin-9 OS=Rattus norvegicus GN=Myh9 PE=1 SV=3	sp|Q62812|MYH9_RAT	lTEMETMQSQLMAEk	0.2586	-0.2442
Myosin-9 OS=Rattus norvegicus GN=Myh9 PE=1 SV=3	sp|Q62812|MYH9_RAT	lVWVPSTk	-0.1822	-0.04588
Myosin-9 OS=Rattus norvegicus GN=Myh9 PE=1 SV=3	sp|Q62812|MYH9_RAT	mEDGVGcLETAEEAk	0.3157	-0.2117
Myosin-9 OS=Rattus norvegicus GN=Myh9 PE=1 SV=3	sp|Q62812|MYH9_RAT	mEDGVGcLETAEEAkR	-0.3016	-0.1875
Myosin-9 OS=Rattus norvegicus GN=Myh9 PE=1 SV=3	sp|Q62812|MYH9_RAT	mQQNIQELEEQLEEEESAR	0.1898	-0.3073
Myosin-9 OS=Rattus norvegicus GN=Myh9 PE=1 SV=3	sp|Q62812|MYH9_RAT	nAEQFkDQADk	-0.3705	-0.3546
Myosin-9 OS=Rattus norvegicus GN=Myh9 PE=1 SV=3	sp|Q62812|MYH9_RAT	ncAAYLR	-0.3738	-0.2495
Myosin-9 OS=Rattus norvegicus GN=Myh9 PE=1 SV=3	sp|Q62812|MYH9_RAT	nGFEPASLk	-0.04304	-0.1915
Myosin-9 OS=Rattus norvegicus GN=Myh9 PE=1 SV=3	sp|Q62812|MYH9_RAT	nkHEAMITDLEER	-0.07954	0.2604
Myosin-9 OS=Rattus norvegicus GN=Myh9 PE=1 SV=3	sp|Q62812|MYH9_RAT	nLPIYSEEIVDMYk	0.5326	-0.1584
Myosin-9 OS=Rattus norvegicus GN=Myh9 PE=1 SV=3	sp|Q62812|MYH9_RAT	nLPIySEEIVDMYk	0.3241	-0.05083
Myosin-9 OS=Rattus norvegicus GN=Myh9 PE=1 SV=3	sp|Q62812|MYH9_RAT	nMDPLNDNIATLLHQSSDk	-0.005243	-0.1431
Myosin-9 OS=Rattus norvegicus GN=Myh9 PE=1 SV=3	sp|Q62812|MYH9_RAT	qAcVLMIk	-0.1158	-0.1794
Myosin-9 OS=Rattus norvegicus GN=Myh9 PE=1 SV=3	sp|Q62812|MYH9_RAT	qAQQERDELADEIANSSGk	-0.08688	-0.2193
Myosin-9 OS=Rattus norvegicus GN=Myh9 PE=1 SV=3	sp|Q62812|MYH9_RAT	qELEEIcHDLEAR	0.2123	-0.2367
Myosin-9 OS=Rattus norvegicus GN=Myh9 PE=1 SV=3	sp|Q62812|MYH9_RAT	qIATLHAQVTDMk	-0.1197	-0.1031
Myosin-9 OS=Rattus norvegicus GN=Myh9 PE=1 SV=3	sp|Q62812|MYH9_RAT	qLEEAEEEAQR	-0.3183	0.01292
Myosin-9 OS=Rattus norvegicus GN=Myh9 PE=1 SV=3	sp|Q62812|MYH9_RAT	qQQLTAMk	-0.01001	-0.1074
Myosin-9 OS=Rattus norvegicus GN=Myh9 PE=1 SV=3	sp|Q62812|MYH9_RAT	qSVSNLEk	0.04747	-0.1309
Myosin-9 OS=Rattus norvegicus GN=Myh9 PE=1 SV=3	sp|Q62812|MYH9_RAT	qTLENERGELANEVk	-0.3824	-0.1768
Myosin-9 OS=Rattus norvegicus GN=Myh9 PE=1 SV=3	sp|Q62812|MYH9_RAT	rGDMPFVVTR	-0.195	-0.2595
Myosin-9 OS=Rattus norvegicus GN=Myh9 PE=1 SV=3	sp|Q62812|MYH9_RAT	rQLEEAEEEAQR	-0.2733	-0.1895
Myosin-9 OS=Rattus norvegicus GN=Myh9 PE=1 SV=3	sp|Q62812|MYH9_RAT	rQQQLTAMk	-0.1323	-0.2737
Myosin-9 OS=Rattus norvegicus GN=Myh9 PE=1 SV=3	sp|Q62812|MYH9_RAT	sMEAEMIQLQEELAAAER	-0.06359	-0.4076
Myosin-9 OS=Rattus norvegicus GN=Myh9 PE=1 SV=3	sp|Q62812|MYH9_RAT	tDLLLEPYNk	0.05567	-0.05395
Myosin-9 OS=Rattus norvegicus GN=Myh9 PE=1 SV=3	sp|Q62812|MYH9_RAT	tELEDTLDSTAAQQELR	0.3767	-0.188
Myosin-9 OS=Rattus norvegicus GN=Myh9 PE=1 SV=3	sp|Q62812|MYH9_RAT	tEMEDLMSSk	0.1826	-0.1461
Myosin-9 OS=Rattus norvegicus GN=Myh9 PE=1 SV=3	sp|Q62812|MYH9_RAT	tEMEDLMSSkDDVGk	-0.5303	-0.4461
Myosin-9 OS=Rattus norvegicus GN=Myh9 PE=1 SV=3	sp|Q62812|MYH9_RAT	tHEAQIQEMR	0.002459	-0.2506
Myosin-9 OS=Rattus norvegicus GN=Myh9 PE=1 SV=3	sp|Q62812|MYH9_RAT	tLEDEAk	0.2509	0.2862
Myosin-9 OS=Rattus norvegicus GN=Myh9 PE=1 SV=3	sp|Q62812|MYH9_RAT	vAAYDkLEk	-0.06683	-0.2012
Myosin-9 OS=Rattus norvegicus GN=Myh9 PE=1 SV=3	sp|Q62812|MYH9_RAT	vAEFTTDLMEEEEk	0.2597	-0.07073
Myosin-9 OS=Rattus norvegicus GN=Myh9 PE=1 SV=3	sp|Q62812|MYH9_RAT	vEAQLQELQVk	0.2469	-0.2134
Myosin-9 OS=Rattus norvegicus GN=Myh9 PE=1 SV=3	sp|Q62812|MYH9_RAT	vEEEAAQk	0.1734	0.6365
Myosin-9 OS=Rattus norvegicus GN=Myh9 PE=1 SV=3	sp|Q62812|MYH9_RAT	vISGVLQLGNIVFk	-0.005186	-0.1873
Myosin-9 OS=Rattus norvegicus GN=Myh9 PE=1 SV=3	sp|Q62812|MYH9_RAT	vSHLLGINVTDFTR	-0.2714	-0.3956
Myosin-9 OS=Rattus norvegicus GN=Myh9 PE=1 SV=3	sp|Q62812|MYH9_RAT	vVFQEFR	0.0126	-0.1929
Myosin-9 OS=Rattus norvegicus GN=Myh9 PE=1 SV=3	sp|Q62812|MYH9_RAT	vVQEQGTHPk	0.125	-0.1281
Myosin-9 OS=Rattus norvegicus GN=Myh9 PE=1 SV=3	sp|Q62812|MYH9_RAT	yEILTPNSIPk	-0.09269	0.07174
Betaine--homocysteine S-methyltransferase 1 OS=Rattus norvegicus GN=Bhmt PE=1 SV=1	sp|O09171|BHMT1_RAT	aGAAIVGVNcHFDPSTSLQTIk	0.07673	-0.06615
Betaine--homocysteine S-methyltransferase 1 OS=Rattus norvegicus GN=Bhmt PE=1 SV=1	sp|O09171|BHMT1_RAT	aGPWTPEAAVEHPEAVR	-0.1779	-0.154
Betaine--homocysteine S-methyltransferase 1 OS=Rattus norvegicus GN=Bhmt PE=1 SV=1	sp|O09171|BHMT1_RAT	aGSNVMQTFTFYASEDk	0.3356	-0.1685
Betaine--homocysteine S-methyltransferase 1 OS=Rattus norvegicus GN=Bhmt PE=1 SV=1	sp|O09171|BHMT1_RAT	aGSNVMQTFTFYASEDkLENR	0.08191	-0.01908
Betaine--homocysteine S-methyltransferase 1 OS=Rattus norvegicus GN=Bhmt PE=1 SV=1	sp|O09171|BHMT1_RAT	aGSNVMQTFTFyASEDkLENR	-0.1142	-0.06409
Betaine--homocysteine S-methyltransferase 1 OS=Rattus norvegicus GN=Bhmt PE=1 SV=1	sp|O09171|BHMT1_RAT	eATTEQQLR	-0.04501	-0.09764
Betaine--homocysteine S-methyltransferase 1 OS=Rattus norvegicus GN=Bhmt PE=1 SV=1	sp|O09171|BHMT1_RAT	eGLEAAR	-0.1532	0.05557
Betaine--homocysteine S-methyltransferase 1 OS=Rattus norvegicus GN=Bhmt PE=1 SV=1	sp|O09171|BHMT1_RAT	eYWQNLR	0.05334	-0.2026
Betaine--homocysteine S-methyltransferase 1 OS=Rattus norvegicus GN=Bhmt PE=1 SV=1	sp|O09171|BHMT1_RAT	gAAELMQQk	-0.07081	0.01715
Betaine--homocysteine S-methyltransferase 1 OS=Rattus norvegicus GN=Bhmt PE=1 SV=1	sp|O09171|BHMT1_RAT	gNYVAEk	-0.1055	-0.04605
Betaine--homocysteine S-methyltransferase 1 OS=Rattus norvegicus GN=Bhmt PE=1 SV=1	sp|O09171|BHMT1_RAT	iASGRPYNPSMSkPDAWGVTk	-0.4091	0.1024
Betaine--homocysteine S-methyltransferase 1 OS=Rattus norvegicus GN=Bhmt PE=1 SV=1	sp|O09171|BHMT1_RAT	iASGRPyNPSMSkPDAWGVTk	-0.6479	0.138
Betaine--homocysteine S-methyltransferase 1 OS=Rattus norvegicus GN=Bhmt PE=1 SV=1	sp|O09171|BHMT1_RAT	iFHQQLEVFMk	-0.1026	0.1806
Betaine--homocysteine S-methyltransferase 1 OS=Rattus norvegicus GN=Bhmt PE=1 SV=1	sp|O09171|BHMT1_RAT	kEYWQNLR	0.07709	-0.1994
Betaine--homocysteine S-methyltransferase 1 OS=Rattus norvegicus GN=Bhmt PE=1 SV=1	sp|O09171|BHMT1_RAT	lNAGEVVIGDGGFVFALEk	0.1556	-0.04437
Betaine--homocysteine S-methyltransferase 1 OS=Rattus norvegicus GN=Bhmt PE=1 SV=1	sp|O09171|BHMT1_RAT	nVDFLIAEYFEHVEEAVWAVEALk	0.7609	-0.1771
Betaine--homocysteine S-methyltransferase 1 OS=Rattus norvegicus GN=Bhmt PE=1 SV=1	sp|O09171|BHMT1_RAT	qGFIDLPEFPFGLEPR	-0.08054	-0.1412
Betaine--homocysteine S-methyltransferase 1 OS=Rattus norvegicus GN=Bhmt PE=1 SV=1	sp|O09171|BHMT1_RAT	qVADEGDALVAGGVSQTPSYLSck	0.09679	-0.1175
Betaine--homocysteine S-methyltransferase 1 OS=Rattus norvegicus GN=Bhmt PE=1 SV=1	sp|O09171|BHMT1_RAT	qVADEGDALVAGGVSQTPSyLSck	0.05756	-0.1623
Betaine--homocysteine S-methyltransferase 1 OS=Rattus norvegicus GN=Bhmt PE=1 SV=1	sp|O09171|BHMT1_RAT	tSGkPIAATMcIGPEGDLHGVSPGEcAVR	0.04361	-0.09477
Betaine--homocysteine S-methyltransferase 1 OS=Rattus norvegicus GN=Bhmt PE=1 SV=1	sp|O09171|BHMT1_RAT	vNEAAcDIAR	-0.04262	-0.002632
D-beta-hydroxybutyrate dehydrogenase, mitochondrial OS=Rattus norvegicus GN=Bdh1 PE=1 SV=2	sp|P29147|BDH_RAT	aVLVTGcDSGFGFSLAk	-0.4531	0.3093
D-beta-hydroxybutyrate dehydrogenase, mitochondrial OS=Rattus norvegicus GN=Bdh1 PE=1 SV=2	sp|P29147|BDH_RAT	eVAEVNLWGTVR	0.1126	-0.2233
D-beta-hydroxybutyrate dehydrogenase, mitochondrial OS=Rattus norvegicus GN=Bdh1 PE=1 SV=2	sp|P29147|BDH_RAT	fGVEAFSDcLR	0.08449	-0.1982
D-beta-hydroxybutyrate dehydrogenase, mitochondrial OS=Rattus norvegicus GN=Bdh1 PE=1 SV=2	sp|P29147|BDH_RAT	gFLVFAGcLLk	-0.1951	-0.2015
D-beta-hydroxybutyrate dehydrogenase, mitochondrial OS=Rattus norvegicus GN=Bdh1 PE=1 SV=2	sp|P29147|BDH_RAT	kMWDELPEVVR	0.1032	-0.143
D-beta-hydroxybutyrate dehydrogenase, mitochondrial OS=Rattus norvegicus GN=Bdh1 PE=1 SV=2	sp|P29147|BDH_RAT	mETYcNSGSTDTSSVINAVTHALTAATPYTR	-0.08251	-0.1523
D-beta-hydroxybutyrate dehydrogenase, mitochondrial OS=Rattus norvegicus GN=Bdh1 PE=1 SV=2	sp|P29147|BDH_RAT	mQVMTHFPGAISDk	-0.1136	-0.1897
D-beta-hydroxybutyrate dehydrogenase, mitochondrial OS=Rattus norvegicus GN=Bdh1 PE=1 SV=2	sp|P29147|BDH_RAT	mWDELPEVVR	0.1613	-0.2616
D-beta-hydroxybutyrate dehydrogenase, mitochondrial OS=Rattus norvegicus GN=Bdh1 PE=1 SV=2	sp|P29147|BDH_RAT	sFLPLLR	-0.2092	-0.1834
D-beta-hydroxybutyrate dehydrogenase, mitochondrial OS=Rattus norvegicus GN=Bdh1 PE=1 SV=2	sp|P29147|BDH_RAT	sGLkDPEk	0.2067	-0.1247
D-beta-hydroxybutyrate dehydrogenase, mitochondrial OS=Rattus norvegicus GN=Bdh1 PE=1 SV=2	sp|P29147|BDH_RAT	sPYcITk	-0.01462	-0.07695
D-beta-hydroxybutyrate dehydrogenase, mitochondrial OS=Rattus norvegicus GN=Bdh1 PE=1 SV=2	sp|P29147|BDH_RAT	tIQLNVcNSEEVEk	0.1695	-0.2098
D-beta-hydroxybutyrate dehydrogenase, mitochondrial OS=Rattus norvegicus GN=Bdh1 PE=1 SV=2	sp|P29147|BDH_RAT	vSVVEPGNFIAATSLYSPER	-0.02163	-0.2963
D-beta-hydroxybutyrate dehydrogenase, mitochondrial OS=Rattus norvegicus GN=Bdh1 PE=1 SV=2	sp|P29147|BDH_RAT	vSVVEPGNFIAATSLySPER	-0.152	-0.1546
D-beta-hydroxybutyrate dehydrogenase, mitochondrial OS=Rattus norvegicus GN=Bdh1 PE=1 SV=2	sp|P29147|BDH_RAT	vVNISSMLGR	-0.08318	-0.1436
D-beta-hydroxybutyrate dehydrogenase, mitochondrial OS=Rattus norvegicus GN=Bdh1 PE=1 SV=2	sp|P29147|BDH_RAT	yEMHPLGVk	0.02442	-0.005294
Keratin, type I cytoskeletal 18 OS=Rattus norvegicus GN=Krt18 PE=1 SV=3	sp|Q5BJY9|K1C18_RAT	aQIFANSVDNAR	-0.09706	-0.1634
Keratin, type I cytoskeletal 18 OS=Rattus norvegicus GN=Krt18 PE=1 SV=3	sp|Q5BJY9|K1C18_RAT	aQYEQLAQk	-0.1664	-0.08662
Keratin, type I cytoskeletal 18 OS=Rattus norvegicus GN=Krt18 PE=1 SV=3	sp|Q5BJY9|K1C18_RAT	aQyEQLAQk	-0.1611	-0.3388
Keratin, type I cytoskeletal 18 OS=Rattus norvegicus GN=Krt18 PE=1 SV=3	sp|Q5BJY9|K1C18_RAT	dAETTLLELR	0.1447	-0.2989
Keratin, type I cytoskeletal 18 OS=Rattus norvegicus GN=Krt18 PE=1 SV=3	sp|Q5BJY9|K1C18_RAT	dAETTLLELRR	-0.03893	0.2705
Keratin, type I cytoskeletal 18 OS=Rattus norvegicus GN=Krt18 PE=1 SV=3	sp|Q5BJY9|K1C18_RAT	dWGHYFk	0.03679	-0.3195
Keratin, type I cytoskeletal 18 OS=Rattus norvegicus GN=Krt18 PE=1 SV=3	sp|Q5BJY9|K1C18_RAT	eELDkYWSQQIEESTTVVTTk	0.3849	-0.1832
Keratin, type I cytoskeletal 18 OS=Rattus norvegicus GN=Krt18 PE=1 SV=3	sp|Q5BJY9|K1C18_RAT	eELLFMk	0.2184	-0.1246
Keratin, type I cytoskeletal 18 OS=Rattus norvegicus GN=Krt18 PE=1 SV=3	sp|Q5BJY9|K1C18_RAT	eTMQDLNDR	-0.04996	-0.2347
Keratin, type I cytoskeletal 18 OS=Rattus norvegicus GN=Krt18 PE=1 SV=3	sp|Q5BJY9|K1C18_RAT	iREYLEk	-0.3258	-0.2772
Keratin, type I cytoskeletal 18 OS=Rattus norvegicus GN=Krt18 PE=1 SV=3	sp|Q5BJY9|K1C18_RAT	kNHEEEVQGLEAQIASSGLTVEVDAPk	0.419	-0.7211
Keratin, type I cytoskeletal 18 OS=Rattus norvegicus GN=Krt18 PE=1 SV=3	sp|Q5BJY9|K1C18_RAT	kVVDDTNITR	0.1516	-0.3661
Keratin, type I cytoskeletal 18 OS=Rattus norvegicus GN=Krt18 PE=1 SV=3	sp|Q5BJY9|K1C18_RAT	lAADDFRVkYETELAMR	-0.172	-0.376
Keratin, type I cytoskeletal 18 OS=Rattus norvegicus GN=Krt18 PE=1 SV=3	sp|Q5BJY9|K1C18_RAT	lEAEIATYR	-0.1424	-0.3029
Keratin, type I cytoskeletal 18 OS=Rattus norvegicus GN=Krt18 PE=1 SV=3	sp|Q5BJY9|K1C18_RAT	lLEDGDDFSLNDALDSSNSMQTVQR	0.2189	-0.3537
Keratin, type I cytoskeletal 18 OS=Rattus norvegicus GN=Krt18 PE=1 SV=3	sp|Q5BJY9|K1C18_RAT	lQLETEIEALk	0.08676	-0.515
Keratin, type I cytoskeletal 18 OS=Rattus norvegicus GN=Krt18 PE=1 SV=3	sp|Q5BJY9|K1C18_RAT	lQLETEIEALkEELLFMkk	0.5549	-0.2977
Keratin, type I cytoskeletal 18 OS=Rattus norvegicus GN=Krt18 PE=1 SV=3	sp|Q5BJY9|K1C18_RAT	nHEEEVQGLEAQIASSGLTVEVDAPk	0.3827	-0.2646
Keratin, type I cytoskeletal 18 OS=Rattus norvegicus GN=Krt18 PE=1 SV=3	sp|Q5BJY9|K1C18_RAT	nLETENR	0.3816	0.3473
Keratin, type I cytoskeletal 18 OS=Rattus norvegicus GN=Krt18 PE=1 SV=3	sp|Q5BJY9|K1C18_RAT	nQNINLENNLGEVEAR	-0.1724	-0.05828
Keratin, type I cytoskeletal 18 OS=Rattus norvegicus GN=Krt18 PE=1 SV=3	sp|Q5BJY9|K1C18_RAT	nREELDkYWSQQIEESTTVVTTk	0.03433	-0.1679
Keratin, type I cytoskeletal 18 OS=Rattus norvegicus GN=Krt18 PE=1 SV=3	sp|Q5BJY9|K1C18_RAT	qSVESDIHGLR	-0.06869	-0.128
Keratin, type I cytoskeletal 18 OS=Rattus norvegicus GN=Krt18 PE=1 SV=3	sp|Q5BJY9|K1C18_RAT	qTQEYEALLNIk	-0.1925	-0.3193
Keratin, type I cytoskeletal 18 OS=Rattus norvegicus GN=Krt18 PE=1 SV=3	sp|Q5BJY9|K1C18_RAT	qTQEyEALLNIk	-0.2014	-0.3178
Keratin, type I cytoskeletal 18 OS=Rattus norvegicus GN=Krt18 PE=1 SV=3	sp|Q5BJY9|K1C18_RAT	rTLQTLEIDLDSMk	0.1313	0.2853
Keratin, type I cytoskeletal 18 OS=Rattus norvegicus GN=Krt18 PE=1 SV=3	sp|Q5BJY9|K1C18_RAT	sTTFSTNYR	0.02538	-0.5431
Keratin, type I cytoskeletal 18 OS=Rattus norvegicus GN=Krt18 PE=1 SV=3	sp|Q5BJY9|K1C18_RAT	sVWGGSVGSAGLAGMGGVQTEk	0.04766	-0.1245
Keratin, type I cytoskeletal 18 OS=Rattus norvegicus GN=Krt18 PE=1 SV=3	sp|Q5BJY9|K1C18_RAT	sVWGGSVGSAGLAGMGGVQTEkETMQDLNDR	-0.2019	-0.4245
Keratin, type I cytoskeletal 18 OS=Rattus norvegicus GN=Krt18 PE=1 SV=3	sp|Q5BJY9|K1C18_RAT	tLQTLEIDLDSMk	-0.08937	-0.2951
Keratin, type I cytoskeletal 18 OS=Rattus norvegicus GN=Krt18 PE=1 SV=3	sp|Q5BJY9|K1C18_RAT	vkLEAEIATYR	-0.2572	-0.4353
Keratin, type I cytoskeletal 18 OS=Rattus norvegicus GN=Krt18 PE=1 SV=3	sp|Q5BJY9|K1C18_RAT	vkYETELAMR	0.1581	-0.478
Keratin, type I cytoskeletal 18 OS=Rattus norvegicus GN=Krt18 PE=1 SV=3	sp|Q5BJY9|K1C18_RAT	vQMEQLNGVLLHLESELAQTR	-0.1039	-0.1944
Keratin, type I cytoskeletal 18 OS=Rattus norvegicus GN=Krt18 PE=1 SV=3	sp|Q5BJY9|K1C18_RAT	vRPASSAASVYAGAGGSGSR	-0.01283	-0.3053
Keratin, type I cytoskeletal 18 OS=Rattus norvegicus GN=Krt18 PE=1 SV=3	sp|Q5BJY9|K1C18_RAT	vRPASSAASVyAGAGGSGSR	0.04421	-0.527
Keratin, type I cytoskeletal 18 OS=Rattus norvegicus GN=Krt18 PE=1 SV=3	sp|Q5BJY9|K1C18_RAT	vVDDTNITR	-0.05918	-0.361
Keratin, type I cytoskeletal 18 OS=Rattus norvegicus GN=Krt18 PE=1 SV=3	sp|Q5BJY9|K1C18_RAT	vVSETNDTR	-0.2164	-0.2663
Keratin, type I cytoskeletal 18 OS=Rattus norvegicus GN=Krt18 PE=1 SV=3	sp|Q5BJY9|K1C18_RAT	yETELAMR	0.06606	-0.3623
Keratin, type I cytoskeletal 18 OS=Rattus norvegicus GN=Krt18 PE=1 SV=3	sp|Q5BJY9|K1C18_RAT	yWSQQIEESTTVVTTk	0.1416	-0.2
Keratin, type I cytoskeletal 18 OS=Rattus norvegicus GN=Krt18 PE=1 SV=3	sp|Q5BJY9|K1C18_RAT	yWSQQIEESTTVVTTk	0.02049	-0.3609
Ornithine carbamoyltransferase, mitochondrial OS=Rattus norvegicus GN=Otc PE=1 SV=1	sp|P00481|OTC_RAT	fGMHLQAATPk	-0.08735	0.2832
Ornithine carbamoyltransferase, mitochondrial OS=Rattus norvegicus GN=Otc PE=1 SV=1	sp|P00481|OTC_RAT	gEYLPLLQGk	0.03682	0.1825
Ornithine carbamoyltransferase, mitochondrial OS=Rattus norvegicus GN=Otc PE=1 SV=1	sp|P00481|OTC_RAT	gGNVLITDTWISMGQEDEk	0.3457	0.1926
Ornithine carbamoyltransferase, mitochondrial OS=Rattus norvegicus GN=Otc PE=1 SV=1	sp|P00481|OTC_RAT	gGNVLITDTWISMGQEDEkk	0.2045	0.1928
Ornithine carbamoyltransferase, mitochondrial OS=Rattus norvegicus GN=Otc PE=1 SV=1	sp|P00481|OTC_RAT	gRDLLTLk	-0.4823	-0.1606
Ornithine carbamoyltransferase, mitochondrial OS=Rattus norvegicus GN=Otc PE=1 SV=1	sp|P00481|OTC_RAT	gYEPDPNIVk	-0.06352	0.3794
Ornithine carbamoyltransferase, mitochondrial OS=Rattus norvegicus GN=Otc PE=1 SV=1	sp|P00481|OTC_RAT	gyEPDPNIVk	-0.05767	0.2592
Ornithine carbamoyltransferase, mitochondrial OS=Rattus norvegicus GN=Otc PE=1 SV=1	sp|P00481|OTC_RAT	kPEEVDDEVFYSPR	0.1656	0.06299
Ornithine carbamoyltransferase, mitochondrial OS=Rattus norvegicus GN=Otc PE=1 SV=1	sp|P00481|OTC_RAT	kPEEVDDEVFySPR	0.1937	0.2349
Ornithine carbamoyltransferase, mitochondrial OS=Rattus norvegicus GN=Otc PE=1 SV=1	sp|P00481|OTC_RAT	lAEQYAk	-0.08148	0.04955
Ornithine carbamoyltransferase, mitochondrial OS=Rattus norvegicus GN=Otc PE=1 SV=1	sp|P00481|OTC_RAT	lQAFQGYQVTMk	0.009081	0.2447
Ornithine carbamoyltransferase, mitochondrial OS=Rattus norvegicus GN=Otc PE=1 SV=1	sp|P00481|OTC_RAT	lSMTNDPLEAAR	0.003428	0.2368
Ornithine carbamoyltransferase, mitochondrial OS=Rattus norvegicus GN=Otc PE=1 SV=1	sp|P00481|OTC_RAT	qkGEYLPLLQGk	-0.02261	0.1833
Ornithine carbamoyltransferase, mitochondrial OS=Rattus norvegicus GN=Otc PE=1 SV=1	sp|P00481|OTC_RAT	qSDLDILAk	0.01255	0.1996
Ornithine carbamoyltransferase, mitochondrial OS=Rattus norvegicus GN=Otc PE=1 SV=1	sp|P00481|OTC_RAT	sLGMIFEk	0.1055	0.2744
Ornithine carbamoyltransferase, mitochondrial OS=Rattus norvegicus GN=Otc PE=1 SV=1	sp|P00481|OTC_RAT	sLVFPEAENR	0.1439	0.2063
Ornithine carbamoyltransferase, mitochondrial OS=Rattus norvegicus GN=Otc PE=1 SV=1	sp|P00481|OTC_RAT	sLVFPEAENRk	0.1025	0.4687
Ornithine carbamoyltransferase, mitochondrial OS=Rattus norvegicus GN=Otc PE=1 SV=1	sp|P00481|OTC_RAT	vAASDWTFLHcLPR	-0.1583	0.2158
Ornithine carbamoyltransferase, mitochondrial OS=Rattus norvegicus GN=Otc PE=1 SV=1	sp|P00481|OTC_RAT	vLSSMTDAVLAR	-0.07772	0.2656
Ornithine carbamoyltransferase, mitochondrial OS=Rattus norvegicus GN=Otc PE=1 SV=1	sp|P00481|OTC_RAT	yGkPVQSQVQLk	0.1104	-0.02992
Fatty acid-binding protein, liver OS=Rattus norvegicus GN=Fabp1 PE=1 SV=1	sp|P02692|FABPL_RAT	aMGLPEDLIQk	0.04843	0.2314
Fatty acid-binding protein, liver OS=Rattus norvegicus GN=Fabp1 PE=1 SV=1	sp|P02692|FABPL_RAT	aMGLPEDLIQkGk	-0.09979	-0.00925
Fatty acid-binding protein, liver OS=Rattus norvegicus GN=Fabp1 PE=1 SV=1	sp|P02692|FABPL_RAT	aMGLPEDLIQkGkDIk	0.1207	-0.7431
Fatty acid-binding protein, liver OS=Rattus norvegicus GN=Fabp1 PE=1 SV=1	sp|P02692|FABPL_RAT	gVSEIVHEGk	0.02778	0.1463
Fatty acid-binding protein, liver OS=Rattus norvegicus GN=Fabp1 PE=1 SV=1	sp|P02692|FABPL_RAT	gVSEIVHEGkk	-0.4404	0.5555
Fatty acid-binding protein, liver OS=Rattus norvegicus GN=Fabp1 PE=1 SV=1	sp|P02692|FABPL_RAT	lTITYGSk	-0.06218	0.2322
Fatty acid-binding protein, liver OS=Rattus norvegicus GN=Fabp1 PE=1 SV=1	sp|P02692|FABPL_RAT	lTITyGSk	-0.1501	0.4032
Fatty acid-binding protein, liver OS=Rattus norvegicus GN=Fabp1 PE=1 SV=1	sp|P02692|FABPL_RAT	sVTEFNGDTITNTMTLGDIVYk	0.3082	0.09139
Fatty acid-binding protein, liver OS=Rattus norvegicus GN=Fabp1 PE=1 SV=1	sp|P02692|FABPL_RAT	sVTEFNGDTITNTMTLGDIVyk	0.04793	-0.2068
Fatty acid-binding protein, liver OS=Rattus norvegicus GN=Fabp1 PE=1 SV=1	sp|P02692|FABPL_RAT	vIHNEFTLGEEcELETMTGEk	0.2754	0.1937
Fatty acid-binding protein, liver OS=Rattus norvegicus GN=Fabp1 PE=1 SV=1	sp|P02692|FABPL_RAT	vIHNEFTLGEEcELETMTGEkVk	-0.2076	-0.2133
Fatty acid-binding protein, liver OS=Rattus norvegicus GN=Fabp1 PE=1 SV=1	sp|P02692|FABPL_RAT	yQVQSQENFEPFMk	0.04627	0.1926
Fatty acid-binding protein, liver OS=Rattus norvegicus GN=Fabp1 PE=1 SV=1	sp|P02692|FABPL_RAT	yQVQSQENFEPFMk	0.1277	0.2717
Uricase OS=Rattus norvegicus GN=Uox PE=1 SV=3	sp|P09118|URIC_RAT	aHVYVEEVPWk	0.1855	-0.2156
Uricase OS=Rattus norvegicus GN=Uox PE=1 SV=3	sp|P09118|URIC_RAT	aHVYVEEVPWkR	-0.4641	-0.0682
Uricase OS=Rattus norvegicus GN=Uox PE=1 SV=3	sp|P09118|URIC_RAT	cFATQVYck	-0.08268	-0.3322
Uricase OS=Rattus norvegicus GN=Uox PE=1 SV=3	sp|P09118|URIC_RAT	dQFTTLPEVk	-0.08777	-0.1572
Uricase OS=Rattus norvegicus GN=Uox PE=1 SV=3	sp|P09118|URIC_RAT	dVDFEATWGAVR	0.0121	-0.2097
Uricase OS=Rattus norvegicus GN=Uox PE=1 SV=3	sp|P09118|URIC_RAT	dYLHGDNSDIIPTDTIk	0.1366	-0.3159
Uricase OS=Rattus norvegicus GN=Uox PE=1 SV=3	sp|P09118|URIC_RAT	dyLHGDNSDIIPTDTIk	0.3195	-0.3478
Uricase OS=Rattus norvegicus GN=Uox PE=1 SV=3	sp|P09118|URIC_RAT	eEVLLPLDNPYGk	0.1548	-0.1861
Uricase OS=Rattus norvegicus GN=Uox PE=1 SV=3	sp|P09118|URIC_RAT	eVATSVQLTLR	-0.1253	-0.2921
Uricase OS=Rattus norvegicus GN=Uox PE=1 SV=3	sp|P09118|URIC_RAT	fAGPYDR	-0.005721	-0.328
Uricase OS=Rattus norvegicus GN=Uox PE=1 SV=3	sp|P09118|URIC_RAT	gEYSPSVQk	0.02642	-0.2047
Uricase OS=Rattus norvegicus GN=Uox PE=1 SV=3	sp|P09118|URIC_RAT	gEySPSVQk	0.01756	-0.06669
Uricase OS=Rattus norvegicus GN=Uox PE=1 SV=3	sp|P09118|URIC_RAT	hVHAFIHTPTGTHFcDVEQVR	-0.2179	-0.1612
Uricase OS=Rattus norvegicus GN=Uox PE=1 SV=3	sp|P09118|URIC_RAT	kDYLHGDNSDIIPTDTIk	0.2277	-0.3473
Uricase OS=Rattus norvegicus GN=Uox PE=1 SV=3	sp|P09118|URIC_RAT	kFAGPYDR	-0.1726	-0.2171
Uricase OS=Rattus norvegicus GN=Uox PE=1 SV=3	sp|P09118|URIC_RAT	mGLINkEEVLLPLDNPYGk	-0.1502	-0.2639
Uricase OS=Rattus norvegicus GN=Uox PE=1 SV=3	sp|P09118|URIC_RAT	nDEVEFVR	0.1304	-0.3937
Uricase OS=Rattus norvegicus GN=Uox PE=1 SV=3	sp|P09118|URIC_RAT	nGPPIIHSGIk	0.01164	-0.2413
Uricase OS=Rattus norvegicus GN=Uox PE=1 SV=3	sp|P09118|URIC_RAT	nTVHVLAk	-0.07679	-0.217
Uricase OS=Rattus norvegicus GN=Uox PE=1 SV=3	sp|P09118|URIC_RAT	tTQSGFEGFIk	0.0009396	-0.06401
Endoplasmin OS=Rattus norvegicus GN=Hsp90b1 PE=1 SV=2	sp|Q66HD0|ENPL_RAT	aQAYQTGk	0.09741	-0.1356
Endoplasmin OS=Rattus norvegicus GN=Hsp90b1 PE=1 SV=2	sp|Q66HD0|ENPL_RAT	dISTNYYASQk	0.2742	-0.09793
Endoplasmin OS=Rattus norvegicus GN=Hsp90b1 PE=1 SV=2	sp|Q66HD0|ENPL_RAT	dISTNyYASQk	0.1507	-0.09902
Endoplasmin OS=Rattus norvegicus GN=Hsp90b1 PE=1 SV=2	sp|Q66HD0|ENPL_RAT	dISTNYyASQk	0.091	-0.2562
Endoplasmin OS=Rattus norvegicus GN=Hsp90b1 PE=1 SV=2	sp|Q66HD0|ENPL_RAT	eAESSPFVER	0.1481	-0.09661
Endoplasmin OS=Rattus norvegicus GN=Hsp90b1 PE=1 SV=2	sp|Q66HD0|ENPL_RAT	eATEkEFEPLLNWMk	-0.1281	0.1834
Endoplasmin OS=Rattus norvegicus GN=Hsp90b1 PE=1 SV=2	sp|Q66HD0|ENPL_RAT	eEADDEAAVEEEEEEkkPk	0.4528	-0.2113
Endoplasmin OS=Rattus norvegicus GN=Hsp90b1 PE=1 SV=2	sp|Q66HD0|ENPL_RAT	eEASDYLELDTIk	0.3793	-0.05625
Endoplasmin OS=Rattus norvegicus GN=Hsp90b1 PE=1 SV=2	sp|Q66HD0|ENPL_RAT	eEASDyLELDTIk	0.2598	-0.1584
Endoplasmin OS=Rattus norvegicus GN=Hsp90b1 PE=1 SV=2	sp|Q66HD0|ENPL_RAT	eEEAIQLDGLNASQIR	0.1342	-0.2463
Endoplasmin OS=Rattus norvegicus GN=Hsp90b1 PE=1 SV=2	sp|Q66HD0|ENPL_RAT	eFEPLLNWMk	0.1608	0.1265
Endoplasmin OS=Rattus norvegicus GN=Hsp90b1 PE=1 SV=2	sp|Q66HD0|ENPL_RAT	eFGTNIk	0.1681	-0.1159
Endoplasmin OS=Rattus norvegicus GN=Hsp90b1 PE=1 SV=2	sp|Q66HD0|ENPL_RAT	eGVkFDESEk	-0.2732	0.1796
Endoplasmin OS=Rattus norvegicus GN=Hsp90b1 PE=1 SV=2	sp|Q66HD0|ENPL_RAT	eSDDPMAYIHFTAEGEVTFk	-1.582	-0.6145
Endoplasmin OS=Rattus norvegicus GN=Hsp90b1 PE=1 SV=2	sp|Q66HD0|ENPL_RAT	eSDDPMAyIHFTAEGEVTFk	0.451	0.7332
Endoplasmin OS=Rattus norvegicus GN=Hsp90b1 PE=1 SV=2	sp|Q66HD0|ENPL_RAT	eTLQQHk	0.06448	-0.05044
Endoplasmin OS=Rattus norvegicus GN=Hsp90b1 PE=1 SV=2	sp|Q66HD0|ENPL_RAT	eVEEDEYk	0.2155	0.2725
Endoplasmin OS=Rattus norvegicus GN=Hsp90b1 PE=1 SV=2	sp|Q66HD0|ENPL_RAT	fAFQAEVNR	0.05516	0.07246
Endoplasmin OS=Rattus norvegicus GN=Hsp90b1 PE=1 SV=2	sp|Q66HD0|ENPL_RAT	gLFDEYGSk	0.3035	0.08301
Endoplasmin OS=Rattus norvegicus GN=Hsp90b1 PE=1 SV=2	sp|Q66HD0|ENPL_RAT	gLFDEyGSk	0.1117	-0.1187
Endoplasmin OS=Rattus norvegicus GN=Hsp90b1 PE=1 SV=2	sp|Q66HD0|ENPL_RAT	gTTITLVLk	-0.09167	0.03186
Endoplasmin OS=Rattus norvegicus GN=Hsp90b1 PE=1 SV=2	sp|Q66HD0|ENPL_RAT	gVVDSDDLPLNVSR	0.1101	-0.1253
Endoplasmin OS=Rattus norvegicus GN=Hsp90b1 PE=1 SV=2	sp|Q66HD0|ENPL_RAT	gYEVIYLTEPVDEYcIQALPEFDGk	0.505	-0.1945
Endoplasmin OS=Rattus norvegicus GN=Hsp90b1 PE=1 SV=2	sp|Q66HD0|ENPL_RAT	gYEVIYLTEPVDEYcIQALPEFDGkR	0.1442	0.04879
Endoplasmin OS=Rattus norvegicus GN=Hsp90b1 PE=1 SV=2	sp|Q66HD0|ENPL_RAT	iYFMAGSSR	-0.1261	0.1265
Endoplasmin OS=Rattus norvegicus GN=Hsp90b1 PE=1 SV=2	sp|Q66HD0|ENPL_RAT	kEAESSPFVER	0.2948	-0.1902
Endoplasmin OS=Rattus norvegicus GN=Hsp90b1 PE=1 SV=2	sp|Q66HD0|ENPL_RAT	kGYEVIYLTEPVDEYcIQALPEFDGk	0.5676	-0.2044
Endoplasmin OS=Rattus norvegicus GN=Hsp90b1 PE=1 SV=2	sp|Q66HD0|ENPL_RAT	kGYEVIYLTEPVDEYcIQALPEFDGkR	0.01301	-0.1095
Endoplasmin OS=Rattus norvegicus GN=Hsp90b1 PE=1 SV=2	sp|Q66HD0|ENPL_RAT	kTFEINPR	-0.08922	-0.03273
Endoplasmin OS=Rattus norvegicus GN=Hsp90b1 PE=1 SV=2	sp|Q66HD0|ENPL_RAT	kTLDMIk	0.1008	-0.03658
Endoplasmin OS=Rattus norvegicus GN=Hsp90b1 PE=1 SV=2	sp|Q66HD0|ENPL_RAT	lGVIEDHSNR	0.05105	-0.009313
Endoplasmin OS=Rattus norvegicus GN=Hsp90b1 PE=1 SV=2	sp|Q66HD0|ENPL_RAT	lIINSLYk	0.00971	-0.03844
Endoplasmin OS=Rattus norvegicus GN=Hsp90b1 PE=1 SV=2	sp|Q66HD0|ENPL_RAT	lISLTDENALAGNEELTVk	0.07881	0.07676
Endoplasmin OS=Rattus norvegicus GN=Hsp90b1 PE=1 SV=2	sp|Q66HD0|ENPL_RAT	lTESPcALVASQYGWSGNMER	-0.2173	0.2583
Endoplasmin OS=Rattus norvegicus GN=Hsp90b1 PE=1 SV=2	sp|Q66HD0|ENPL_RAT	nLGTIAk	0.09663	-0.01515
Endoplasmin OS=Rattus norvegicus GN=Hsp90b1 PE=1 SV=2	sp|Q66HD0|ENPL_RAT	nLLHVTDTGVGMTR	0.3073	-0.07392
Endoplasmin OS=Rattus norvegicus GN=Hsp90b1 PE=1 SV=2	sp|Q66HD0|ENPL_RAT	rVFITDDFHDMMPk	-0.1451	0.385
Endoplasmin OS=Rattus norvegicus GN=Hsp90b1 PE=1 SV=2	sp|Q66HD0|ENPL_RAT	sGTSEFLNk	0.06242	0.0636
Endoplasmin OS=Rattus norvegicus GN=Hsp90b1 PE=1 SV=2	sp|Q66HD0|ENPL_RAT	sGYLLPDTk	0.1746	0.01081
Endoplasmin OS=Rattus norvegicus GN=Hsp90b1 PE=1 SV=2	sp|Q66HD0|ENPL_RAT	sGyLLPDTk	0.1442	0.1668
Endoplasmin OS=Rattus norvegicus GN=Hsp90b1 PE=1 SV=2	sp|Q66HD0|ENPL_RAT	sILFVPTSAPR	0.05778	0.137
Endoplasmin OS=Rattus norvegicus GN=Hsp90b1 PE=1 SV=2	sp|Q66HD0|ENPL_RAT	tDDEVVQR	-0.007695	0.3921
Endoplasmin OS=Rattus norvegicus GN=Hsp90b1 PE=1 SV=2	sp|Q66HD0|ENPL_RAT	tDDEVVQREEEAIQLDGLNASQIR	0.3245	-0.129
Endoplasmin OS=Rattus norvegicus GN=Hsp90b1 PE=1 SV=2	sp|Q66HD0|ENPL_RAT	tETVEEPLEEDETAQEEk	0.685	-0.2194
Endoplasmin OS=Rattus norvegicus GN=Hsp90b1 PE=1 SV=2	sp|Q66HD0|ENPL_RAT	tETVEEPLEEDETAQEEkEEADDEAAVEEEEEEk	0.7643	0.7602
Endoplasmin OS=Rattus norvegicus GN=Hsp90b1 PE=1 SV=2	sp|Q66HD0|ENPL_RAT	tFEINPR	0.1171	-0.04745
Endoplasmin OS=Rattus norvegicus GN=Hsp90b1 PE=1 SV=2	sp|Q66HD0|ENPL_RAT	tLDMIkk	-0.1061	-0.2399
Endoplasmin OS=Rattus norvegicus GN=Hsp90b1 PE=1 SV=2	sp|Q66HD0|ENPL_RAT	vFITDDFHDMMPk	0.2711	0.1214
Endoplasmin OS=Rattus norvegicus GN=Hsp90b1 PE=1 SV=2	sp|Q66HD0|ENPL_RAT	yNDTFWk	0.3876	0.0255
78 kDa glucose-regulated protein OS=Rattus norvegicus GN=Hspa5 PE=1 SV=1	sp|P06761|GRP78_RAT	akFEELNMDLFR	-0.02778	-0.07201
78 kDa glucose-regulated protein OS=Rattus norvegicus GN=Hspa5 PE=1 SV=1	sp|P06761|GRP78_RAT	aLSSQHQAR	0.3368	-0.2154
78 kDa glucose-regulated protein OS=Rattus norvegicus GN=Hspa5 PE=1 SV=1	sp|P06761|GRP78_RAT	dAGTIAGLNVMR	0.03841	-0.236
78 kDa glucose-regulated protein OS=Rattus norvegicus GN=Hspa5 PE=1 SV=1	sp|P06761|GRP78_RAT	dNHLLGTFDLTGIPPAPR	-0.1749	-0.1173
78 kDa glucose-regulated protein OS=Rattus norvegicus GN=Hspa5 PE=1 SV=1	sp|P06761|GRP78_RAT	eDVGTVVGIDLGTTYScVGVFk	0.3833	-0.09699
78 kDa glucose-regulated protein OS=Rattus norvegicus GN=Hspa5 PE=1 SV=1	sp|P06761|GRP78_RAT	eLEEIVQPIISk	0.1146	-0.08067
78 kDa glucose-regulated protein OS=Rattus norvegicus GN=Hspa5 PE=1 SV=1	sp|P06761|GRP78_RAT	eTAEAYLGk	-0.01265	-0.2329
78 kDa glucose-regulated protein OS=Rattus norvegicus GN=Hspa5 PE=1 SV=1	sp|P06761|GRP78_RAT	eTAEAyLGk	0.1881	-0.0191
78 kDa glucose-regulated protein OS=Rattus norvegicus GN=Hspa5 PE=1 SV=1	sp|P06761|GRP78_RAT	eTAEAYLGkk	-0.726	-0.2269
78 kDa glucose-regulated protein OS=Rattus norvegicus GN=Hspa5 PE=1 SV=1	sp|P06761|GRP78_RAT	fAEEDkk	0.1014	-0.1907
78 kDa glucose-regulated protein OS=Rattus norvegicus GN=Hspa5 PE=1 SV=1	sp|P06761|GRP78_RAT	fEELNMDLFR	0.09932	-0.133
78 kDa glucose-regulated protein OS=Rattus norvegicus GN=Hspa5 PE=1 SV=1	sp|P06761|GRP78_RAT	gVPQIEVTFEIDVNGILR	-0.5407	-0.3925
78 kDa glucose-regulated protein OS=Rattus norvegicus GN=Hspa5 PE=1 SV=1	sp|P06761|GRP78_RAT	iDTRNELESYAYSLk	Value Missing	-0.6466
78 kDa glucose-regulated protein OS=Rattus norvegicus GN=Hspa5 PE=1 SV=1	sp|P06761|GRP78_RAT	iEIESFFEGEDFSETLTR	0.05152	-0.09527
78 kDa glucose-regulated protein OS=Rattus norvegicus GN=Hspa5 PE=1 SV=1	sp|P06761|GRP78_RAT	iEWLESHQDADIEDFk	0.3595	-0.2336
78 kDa glucose-regulated protein OS=Rattus norvegicus GN=Hspa5 PE=1 SV=1	sp|P06761|GRP78_RAT	iEWLESHQDADIEDFkAk	-0.7403	-0.3282
78 kDa glucose-regulated protein OS=Rattus norvegicus GN=Hspa5 PE=1 SV=1	sp|P06761|GRP78_RAT	iINEPTAAAIAYGLDkR	-0.2066	-0.09456
78 kDa glucose-regulated protein OS=Rattus norvegicus GN=Hspa5 PE=1 SV=1	sp|P06761|GRP78_RAT	iTITNDQNR	-0.05534	-0.1459
78 kDa glucose-regulated protein OS=Rattus norvegicus GN=Hspa5 PE=1 SV=1	sp|P06761|GRP78_RAT	iTPSYVAFTPEGER	-0.06793	-0.1147
78 kDa glucose-regulated protein OS=Rattus norvegicus GN=Hspa5 PE=1 SV=1	sp|P06761|GRP78_RAT	iTPSyVAFTPEGER	-0.1069	-0.2446
78 kDa glucose-regulated protein OS=Rattus norvegicus GN=Hspa5 PE=1 SV=1	sp|P06761|GRP78_RAT	kELEEIVQPIISk	-0.3799	-0.3657
78 kDa glucose-regulated protein OS=Rattus norvegicus GN=Hspa5 PE=1 SV=1	sp|P06761|GRP78_RAT	kkELEEIVQPIISk	-0.4859	-0.07673
78 kDa glucose-regulated protein OS=Rattus norvegicus GN=Hspa5 PE=1 SV=1	sp|P06761|GRP78_RAT	kSDIDEIVLVGGSTR	0.005877	-0.2355
78 kDa glucose-regulated protein OS=Rattus norvegicus GN=Hspa5 PE=1 SV=1	sp|P06761|GRP78_RAT	kSQIFSTASDNQPTVTIk	-0.1342	-0.0321
78 kDa glucose-regulated protein OS=Rattus norvegicus GN=Hspa5 PE=1 SV=1	sp|P06761|GRP78_RAT	lTPEEIER	-0.06393	-0.2394
78 kDa glucose-regulated protein OS=Rattus norvegicus GN=Hspa5 PE=1 SV=1	sp|P06761|GRP78_RAT	lYGSGGPPPTGEEDTSEkDEL	0.3146	-0.3292
78 kDa glucose-regulated protein OS=Rattus norvegicus GN=Hspa5 PE=1 SV=1	sp|P06761|GRP78_RAT	lyGSGGPPPTGEEDTSEkDEL	0.226	-0.3372
78 kDa glucose-regulated protein OS=Rattus norvegicus GN=Hspa5 PE=1 SV=1	sp|P06761|GRP78_RAT	mkETAEAYLGk	-0.03096	-0.07573
78 kDa glucose-regulated protein OS=Rattus norvegicus GN=Hspa5 PE=1 SV=1	sp|P06761|GRP78_RAT	mVNDAEk	-0.005672	-0.1543
78 kDa glucose-regulated protein OS=Rattus norvegicus GN=Hspa5 PE=1 SV=1	sp|P06761|GRP78_RAT	nELESYAYSLk	0.2027	-0.1428
78 kDa glucose-regulated protein OS=Rattus norvegicus GN=Hspa5 PE=1 SV=1	sp|P06761|GRP78_RAT	nELESyAYSLk	0.1758	-0.1967
78 kDa glucose-regulated protein OS=Rattus norvegicus GN=Hspa5 PE=1 SV=1	sp|P06761|GRP78_RAT	nELESYAySLk	0.1332	-0.1628
78 kDa glucose-regulated protein OS=Rattus norvegicus GN=Hspa5 PE=1 SV=1	sp|P06761|GRP78_RAT	nQLTSNPENTVFDAk	0.06303	-0.1365
78 kDa glucose-regulated protein OS=Rattus norvegicus GN=Hspa5 PE=1 SV=1	sp|P06761|GRP78_RAT	nTVVPTk	0.06711	-0.2017
78 kDa glucose-regulated protein OS=Rattus norvegicus GN=Hspa5 PE=1 SV=1	sp|P06761|GRP78_RAT	nTVVPTkk	-0.155	0.1052
78 kDa glucose-regulated protein OS=Rattus norvegicus GN=Hspa5 PE=1 SV=1	sp|P06761|GRP78_RAT	sDIDEIVLVGGSTR	0.0215	-0.4265
78 kDa glucose-regulated protein OS=Rattus norvegicus GN=Hspa5 PE=1 SV=1	sp|P06761|GRP78_RAT	sQIFSTASDNQPTVTIk	0.05321	-0.04575
78 kDa glucose-regulated protein OS=Rattus norvegicus GN=Hspa5 PE=1 SV=1	sp|P06761|GRP78_RAT	sTMkPVQk	0.194	-0.1361
78 kDa glucose-regulated protein OS=Rattus norvegicus GN=Hspa5 PE=1 SV=1	sp|P06761|GRP78_RAT	tFAPEEISAMVLTk	0.09216	-0.1147
78 kDa glucose-regulated protein OS=Rattus norvegicus GN=Hspa5 PE=1 SV=1	sp|P06761|GRP78_RAT	tkPYIQVDIGGGQTk	0.06623	-0.07684
78 kDa glucose-regulated protein OS=Rattus norvegicus GN=Hspa5 PE=1 SV=1	sp|P06761|GRP78_RAT	vLEDSDLk	-0.06476	-0.1743
78 kDa glucose-regulated protein OS=Rattus norvegicus GN=Hspa5 PE=1 SV=1	sp|P06761|GRP78_RAT	vLEDSDLkk	0.05649	-0.01885
78 kDa glucose-regulated protein OS=Rattus norvegicus GN=Hspa5 PE=1 SV=1	sp|P06761|GRP78_RAT	vMEHFIk	0.02817	-0.1239
78 kDa glucose-regulated protein OS=Rattus norvegicus GN=Hspa5 PE=1 SV=1	sp|P06761|GRP78_RAT	vTHAVVTVPAYFNDAQR	-0.07585	-0.05567
78 kDa glucose-regulated protein OS=Rattus norvegicus GN=Hspa5 PE=1 SV=1	sp|P06761|GRP78_RAT	vYEGERPLTk	0.05911	-0.2436
Voltage-dependent anion-selective channel protein 1 OS=Rattus norvegicus GN=Vdac1 PE=1 SV=4	sp|Q9Z2L0|VDAC1_RAT	eHINLGcDVDFDIAGPSIR	-0.04643	-0.3549
Voltage-dependent anion-selective channel protein 1 OS=Rattus norvegicus GN=Vdac1 PE=1 SV=4	sp|Q9Z2L0|VDAC1_RAT	gYGFGLIk	-0.2032	-0.1856
Voltage-dependent anion-selective channel protein 1 OS=Rattus norvegicus GN=Vdac1 PE=1 SV=4	sp|Q9Z2L0|VDAC1_RAT	kLETAVNLAWTAGNSNTR	-0.336	-0.6764
Voltage-dependent anion-selective channel protein 1 OS=Rattus norvegicus GN=Vdac1 PE=1 SV=4	sp|Q9Z2L0|VDAC1_RAT	lGLGLEFQA	-0.177	-0.141
Voltage-dependent anion-selective channel protein 1 OS=Rattus norvegicus GN=Vdac1 PE=1 SV=4	sp|Q9Z2L0|VDAC1_RAT	lTFDSSFSPNTGk	0.2271	0.01344
Voltage-dependent anion-selective channel protein 1 OS=Rattus norvegicus GN=Vdac1 PE=1 SV=4	sp|Q9Z2L0|VDAC1_RAT	lTFDSSFSPNTGkk	-0.3073	-0.04722
Voltage-dependent anion-selective channel protein 1 OS=Rattus norvegicus GN=Vdac1 PE=1 SV=4	sp|Q9Z2L0|VDAC1_RAT	lTLSALLDGk	-0.1051	-0.1241
Voltage-dependent anion-selective channel protein 1 OS=Rattus norvegicus GN=Vdac1 PE=1 SV=4	sp|Q9Z2L0|VDAC1_RAT	nVNAGGHk	-0.324	0.05892
Voltage-dependent anion-selective channel protein 1 OS=Rattus norvegicus GN=Vdac1 PE=1 SV=4	sp|Q9Z2L0|VDAC1_RAT	sENGLEFTSSGSANTETTk	0.2897	-0.05657
Voltage-dependent anion-selective channel protein 1 OS=Rattus norvegicus GN=Vdac1 PE=1 SV=4	sp|Q9Z2L0|VDAC1_RAT	tDEFQLHTNVNDGTEFGGSIYQk	0.2924	-0.2462
Voltage-dependent anion-selective channel protein 1 OS=Rattus norvegicus GN=Vdac1 PE=1 SV=4	sp|Q9Z2L0|VDAC1_RAT	tDEFQLHTNVNDGTEFGGSIyQk	0.237	-0.2496
Voltage-dependent anion-selective channel protein 1 OS=Rattus norvegicus GN=Vdac1 PE=1 SV=4	sp|Q9Z2L0|VDAC1_RAT	vNGSLETk	0.0121	-0.2794
Voltage-dependent anion-selective channel protein 1 OS=Rattus norvegicus GN=Vdac1 PE=1 SV=4	sp|Q9Z2L0|VDAC1_RAT	vTQSNFAVGYk	0.1326	-0.02543
Voltage-dependent anion-selective channel protein 1 OS=Rattus norvegicus GN=Vdac1 PE=1 SV=4	sp|Q9Z2L0|VDAC1_RAT	wNTDNTLGTEITVEDQLAR	0.2459	-0.2154
Voltage-dependent anion-selective channel protein 1 OS=Rattus norvegicus GN=Vdac1 PE=1 SV=4	sp|Q9Z2L0|VDAC1_RAT	wTEYGLTFTEk	0.3598	-0.1467
Voltage-dependent anion-selective channel protein 1 OS=Rattus norvegicus GN=Vdac1 PE=1 SV=4	sp|Q9Z2L0|VDAC1_RAT	yQVDPDAcFSAk	0.1267	-0.145
Voltage-dependent anion-selective channel protein 1 OS=Rattus norvegicus GN=Vdac1 PE=1 SV=4	sp|Q9Z2L0|VDAC1_RAT	yQVDPDAcFSAk	0.231	0.0551
Succinate dehydrogenase [ubiquinone] flavoprotein subunit, mitochondrial OS=Rattus norvegicus GN=Sdha PE=1 SV=1	sp|Q920L2|DHSA_RAT	aAFGLSEAGFNTAcLTk	-0.1116	-0.05858
Succinate dehydrogenase [ubiquinone] flavoprotein subunit, mitochondrial OS=Rattus norvegicus GN=Sdha PE=1 SV=1	sp|Q920L2|DHSA_RAT	acALSIAEScRPGDk	0.08445	-0.1075
Succinate dehydrogenase [ubiquinone] flavoprotein subunit, mitochondrial OS=Rattus norvegicus GN=Sdha PE=1 SV=1	sp|Q920L2|DHSA_RAT	acALSIAEScRPGDkVPPIk	-0.4386	-0.1179
Succinate dehydrogenase [ubiquinone] flavoprotein subunit, mitochondrial OS=Rattus norvegicus GN=Sdha PE=1 SV=1	sp|Q920L2|DHSA_RAT	aFGGQSLk	0.01588	-0.1302
Succinate dehydrogenase [ubiquinone] flavoprotein subunit, mitochondrial OS=Rattus norvegicus GN=Sdha PE=1 SV=1	sp|Q920L2|DHSA_RAT	aGLPcQDLEFVQFHPTGIyGAGcLITEGcR	-0.2867	0.191
Succinate dehydrogenase [ubiquinone] flavoprotein subunit, mitochondrial OS=Rattus norvegicus GN=Sdha PE=1 SV=1	sp|Q920L2|DHSA_RAT	aNAGEESVMNLDk	0.1723	-0.1273
Succinate dehydrogenase [ubiquinone] flavoprotein subunit, mitochondrial OS=Rattus norvegicus GN=Sdha PE=1 SV=1	sp|Q920L2|DHSA_RAT	cccVADR	-0.2063	0.05509
Succinate dehydrogenase [ubiquinone] flavoprotein subunit, mitochondrial OS=Rattus norvegicus GN=Sdha PE=1 SV=1	sp|Q920L2|DHSA_RAT	dHVYLQLHHLPPEQLATR	-0.2579	-0.1324
Succinate dehydrogenase [ubiquinone] flavoprotein subunit, mitochondrial OS=Rattus norvegicus GN=Sdha PE=1 SV=1	sp|Q920L2|DHSA_RAT	ePIPVLPTVHYNMGGIPTNYk	-0.07376	0.01495
Succinate dehydrogenase [ubiquinone] flavoprotein subunit, mitochondrial OS=Rattus norvegicus GN=Sdha PE=1 SV=1	sp|Q920L2|DHSA_RAT	fADGSVR	-0.0335	-0.03494
Succinate dehydrogenase [ubiquinone] flavoprotein subunit, mitochondrial OS=Rattus norvegicus GN=Sdha PE=1 SV=1	sp|Q920L2|DHSA_RAT	gcGPEkDHVYLQLHHLPPEQLATR	-0.2905	-0.1511
Succinate dehydrogenase [ubiquinone] flavoprotein subunit, mitochondrial OS=Rattus norvegicus GN=Sdha PE=1 SV=1	sp|Q920L2|DHSA_RAT	gEGGILINSQGER	-0.05132	-0.1093
Succinate dehydrogenase [ubiquinone] flavoprotein subunit, mitochondrial OS=Rattus norvegicus GN=Sdha PE=1 SV=1	sp|Q920L2|DHSA_RAT	gSDWLGDQDAIHYMTEQAPASVVELENYGMPFSR	0.3308	-0.3252
Succinate dehydrogenase [ubiquinone] flavoprotein subunit, mitochondrial OS=Rattus norvegicus GN=Sdha PE=1 SV=1	sp|Q920L2|DHSA_RAT	gVIALcIEDGSIHR	-0.05728	-0.1055
Succinate dehydrogenase [ubiquinone] flavoprotein subunit, mitochondrial OS=Rattus norvegicus GN=Sdha PE=1 SV=1	sp|Q920L2|DHSA_RAT	hTLSYVDTk	0.2013	-0.2659
Succinate dehydrogenase [ubiquinone] flavoprotein subunit, mitochondrial OS=Rattus norvegicus GN=Sdha PE=1 SV=1	sp|Q920L2|DHSA_RAT	hVNGQDQIVPGLYAcGEAAcASVHGANR	-0.02828	-0.1359
Succinate dehydrogenase [ubiquinone] flavoprotein subunit, mitochondrial OS=Rattus norvegicus GN=Sdha PE=1 SV=1	sp|Q920L2|DHSA_RAT	hVNGQDQIVPGLyAcGEAAcASVHGANR	-0.01758	-0.1347
Succinate dehydrogenase [ubiquinone] flavoprotein subunit, mitochondrial OS=Rattus norvegicus GN=Sdha PE=1 SV=1	sp|Q920L2|DHSA_RAT	iDEYDYSkPIEGQQk	0.3656	-0.3345
Succinate dehydrogenase [ubiquinone] flavoprotein subunit, mitochondrial OS=Rattus norvegicus GN=Sdha PE=1 SV=1	sp|Q920L2|DHSA_RAT	kHTLSYVDTk	0.1563	-0.289
Succinate dehydrogenase [ubiquinone] flavoprotein subunit, mitochondrial OS=Rattus norvegicus GN=Sdha PE=1 SV=1	sp|Q920L2|DHSA_RAT	kHTLSyVDTk	0.2765	-0.4144
Succinate dehydrogenase [ubiquinone] flavoprotein subunit, mitochondrial OS=Rattus norvegicus GN=Sdha PE=1 SV=1	sp|Q920L2|DHSA_RAT	kPFAEHWR	0.02231	-0.304
Succinate dehydrogenase [ubiquinone] flavoprotein subunit, mitochondrial OS=Rattus norvegicus GN=Sdha PE=1 SV=1	sp|Q920L2|DHSA_RAT	lGANSLLDLVVFGR	0.03499	0.04439
Succinate dehydrogenase [ubiquinone] flavoprotein subunit, mitochondrial OS=Rattus norvegicus GN=Sdha PE=1 SV=1	sp|Q920L2|DHSA_RAT	nTIIATGGYGR	0.06432	-0.2119
Succinate dehydrogenase [ubiquinone] flavoprotein subunit, mitochondrial OS=Rattus norvegicus GN=Sdha PE=1 SV=1	sp|Q920L2|DHSA_RAT	sMQSHAAVFR	0.01579	-0.104
Succinate dehydrogenase [ubiquinone] flavoprotein subunit, mitochondrial OS=Rattus norvegicus GN=Sdha PE=1 SV=1	sp|Q920L2|DHSA_RAT	sMTLEIR	6.485e-05	-0.2216
Succinate dehydrogenase [ubiquinone] flavoprotein subunit, mitochondrial OS=Rattus norvegicus GN=Sdha PE=1 SV=1	sp|Q920L2|DHSA_RAT	tGHSLLHTLYGR	-0.08312	-0.1467
Succinate dehydrogenase [ubiquinone] flavoprotein subunit, mitochondrial OS=Rattus norvegicus GN=Sdha PE=1 SV=1	sp|Q920L2|DHSA_RAT	tLNEADcATVPPAIR	-0.01299	-0.211
Succinate dehydrogenase [ubiquinone] flavoprotein subunit, mitochondrial OS=Rattus norvegicus GN=Sdha PE=1 SV=1	sp|Q920L2|DHSA_RAT	tyFScTSAHTSTGDGTAMVTR	0.243	-0.1855
Succinate dehydrogenase [ubiquinone] flavoprotein subunit, mitochondrial OS=Rattus norvegicus GN=Sdha PE=1 SV=1	sp|Q920L2|DHSA_RAT	vGSVLQEGcEk	-0.02074	-0.1727
Succinate dehydrogenase [ubiquinone] flavoprotein subunit, mitochondrial OS=Rattus norvegicus GN=Sdha PE=1 SV=1	sp|Q920L2|DHSA_RAT	vRIDEYDYSkPIEGQQk	-0.3271	-0.119
Succinate dehydrogenase [ubiquinone] flavoprotein subunit, mitochondrial OS=Rattus norvegicus GN=Sdha PE=1 SV=1	sp|Q920L2|DHSA_RAT	vSDAISTQYPVVDHEFDAVVVGAGGAGLR	0.001191	-0.1495
Succinate dehydrogenase [ubiquinone] flavoprotein subunit, mitochondrial OS=Rattus norvegicus GN=Sdha PE=1 SV=1	sp|Q920L2|DHSA_RAT	vSDAISTQyPVVDHEFDAVVVGAGGAGLR	-0.06954	-0.1535
Succinate dehydrogenase [ubiquinone] flavoprotein subunit, mitochondrial OS=Rattus norvegicus GN=Sdha PE=1 SV=1	sp|Q920L2|DHSA_RAT	vSQLYGDLQHLk	0.08566	-0.3476
Succinate dehydrogenase [ubiquinone] flavoprotein subunit, mitochondrial OS=Rattus norvegicus GN=Sdha PE=1 SV=1	sp|Q920L2|DHSA_RAT	vSQLyGDLQHLk	0.06073	-0.1835
Succinate dehydrogenase [ubiquinone] flavoprotein subunit, mitochondrial OS=Rattus norvegicus GN=Sdha PE=1 SV=1	sp|Q920L2|DHSA_RAT	vTLDYRPVIDk	0.1069	-0.2138
Succinate dehydrogenase [ubiquinone] flavoprotein subunit, mitochondrial OS=Rattus norvegicus GN=Sdha PE=1 SV=1	sp|Q920L2|DHSA_RAT	wHFYDTVk	0.3216	0.004138
Fatty acid synthase OS=Rattus norvegicus GN=Fasn PE=1 SV=3	sp|P12785|FAS_RAT	aADQYkPk	-0.01104	-0.05184
Fatty acid synthase OS=Rattus norvegicus GN=Fasn PE=1 SV=3	sp|P12785|FAS_RAT	acIDTALENLSTLk	0.08377	0.1214
Fatty acid synthase OS=Rattus norvegicus GN=Fasn PE=1 SV=3	sp|P12785|FAS_RAT	aEAVVAVLLTk	-0.08786	0.6005
Fatty acid synthase OS=Rattus norvegicus GN=Fasn PE=1 SV=3	sp|P12785|FAS_RAT	aGLYGLPk	-0.09286	0.1345
Fatty acid synthase OS=Rattus norvegicus GN=Fasn PE=1 SV=3	sp|P12785|FAS_RAT	aGSDTELAAPk	-0.06883	0.1615
Fatty acid synthase OS=Rattus norvegicus GN=Fasn PE=1 SV=3	sp|P12785|FAS_RAT	aLHLVGLk	0.3239	0.333
Fatty acid synthase OS=Rattus norvegicus GN=Fasn PE=1 SV=3	sp|P12785|FAS_RAT	aLIAEATk	-0.2088	0.3626
Fatty acid synthase OS=Rattus norvegicus GN=Fasn PE=1 SV=3	sp|P12785|FAS_RAT	aQVEDAFR	-0.0295	0.003915
Fatty acid synthase OS=Rattus norvegicus GN=Fasn PE=1 SV=3	sp|P12785|FAS_RAT	aVAHGDGEAQR	-0.06284	0.1151
Fatty acid synthase OS=Rattus norvegicus GN=Fasn PE=1 SV=3	sp|P12785|FAS_RAT	cLAQHGR	-0.2572	0.2028
Fatty acid synthase OS=Rattus norvegicus GN=Fasn PE=1 SV=3	sp|P12785|FAS_RAT	cLGVTVSGGVYISR	0.1929	0.4744
Fatty acid synthase OS=Rattus norvegicus GN=Fasn PE=1 SV=3	sp|P12785|FAS_RAT	cPPGVVPAcHNSEDTVTISGPQAAVNEFVEQLk	0.3873	0.09962
Fatty acid synthase OS=Rattus norvegicus GN=Fasn PE=1 SV=3	sp|P12785|FAS_RAT	dAMLENQTPELFQDVNkPk	0.1791	0.07277
Fatty acid synthase OS=Rattus norvegicus GN=Fasn PE=1 SV=3	sp|P12785|FAS_RAT	dANLPAGSMAAVGLSWEEck	0.295	0.03097
Fatty acid synthase OS=Rattus norvegicus GN=Fasn PE=1 SV=3	sp|P12785|FAS_RAT	dcMLGMEFSGR	0.7011	-0.076
Fatty acid synthase OS=Rattus norvegicus GN=Fasn PE=1 SV=3	sp|P12785|FAS_RAT	dGAWGAFR	0.06563	0.05522
Fatty acid synthase OS=Rattus norvegicus GN=Fasn PE=1 SV=3	sp|P12785|FAS_RAT	dGVVkPLk	-0.06947	0.116
Fatty acid synthase OS=Rattus norvegicus GN=Fasn PE=1 SV=3	sp|P12785|FAS_RAT	dIMLATGk	0.07301	0.2384
Fatty acid synthase OS=Rattus norvegicus GN=Fasn PE=1 SV=3	sp|P12785|FAS_RAT	dPETLLGYSMVGcQR	0.2008	0.188
Fatty acid synthase OS=Rattus norvegicus GN=Fasn PE=1 SV=3	sp|P12785|FAS_RAT	dTSFEQHVLLHTGGk	0.01168	0.09439
Fatty acid synthase OS=Rattus norvegicus GN=Fasn PE=1 SV=3	sp|P12785|FAS_RAT	eEEPEAMLPGAQPTLISAISk	0.03214	0.2878
Fatty acid synthase OS=Rattus norvegicus GN=Fasn PE=1 SV=3	sp|P12785|FAS_RAT	eHDLVLPIR	-0.1761	0.01053
Fatty acid synthase OS=Rattus norvegicus GN=Fasn PE=1 SV=3	sp|P12785|FAS_RAT	eQGVTFPSGEAQEQLIR	0.1185	0.2183
Fatty acid synthase OS=Rattus norvegicus GN=Fasn PE=1 SV=3	sp|P12785|FAS_RAT	eVAELLk	0.04258	0.1814
Fatty acid synthase OS=Rattus norvegicus GN=Fasn PE=1 SV=3	sp|P12785|FAS_RAT	fPQLDDTSFANSR	-0.016	-0.007224
Fatty acid synthase OS=Rattus norvegicus GN=Fasn PE=1 SV=3	sp|P12785|FAS_RAT	fVFTPHVEPEcLSESAILQk	0.2653	0.2578
Fatty acid synthase OS=Rattus norvegicus GN=Fasn PE=1 SV=3	sp|P12785|FAS_RAT	gLESIINIIHSSLAEPR	0.067	0.1844
Fatty acid synthase OS=Rattus norvegicus GN=Fasn PE=1 SV=3	sp|P12785|FAS_RAT	gNAGQSNYGFANSTMER	0.1133	0.1698
Fatty acid synthase OS=Rattus norvegicus GN=Fasn PE=1 SV=3	sp|P12785|FAS_RAT	gTNTGVWVGVSGSEASEALSR	0.3436	0.0247
Fatty acid synthase OS=Rattus norvegicus GN=Fasn PE=1 SV=3	sp|P12785|FAS_RAT	gTPLISPHIk	-0.3793	0.282
Fatty acid synthase OS=Rattus norvegicus GN=Fasn PE=1 SV=3	sp|P12785|FAS_RAT	gVDLVLNSLAEEk	0.1248	0.04039
Fatty acid synthase OS=Rattus norvegicus GN=Fasn PE=1 SV=3	sp|P12785|FAS_RAT	gYDYGPHFQGVYEATLEGEQGk	0.2338	0.357
Fatty acid synthase OS=Rattus norvegicus GN=Fasn PE=1 SV=3	sp|P12785|FAS_RAT	hFQLEQDkPEEQTAHAFVNVLTR	0.1443	0.1496
Fatty acid synthase OS=Rattus norvegicus GN=Fasn PE=1 SV=3	sp|P12785|FAS_RAT	kLQEMSSk	0.1757	0.2264
Fatty acid synthase OS=Rattus norvegicus GN=Fasn PE=1 SV=3	sp|P12785|FAS_RAT	lDPGSSELQk	0.1832	0.2043
Fatty acid synthase OS=Rattus norvegicus GN=Fasn PE=1 SV=3	sp|P12785|FAS_RAT	lFDHPEVPIPAESESVSR	0.06033	0.1332
Fatty acid synthase OS=Rattus norvegicus GN=Fasn PE=1 SV=3	sp|P12785|FAS_RAT	lGMLSPDGTcR	0.03513	0.1636
Fatty acid synthase OS=Rattus norvegicus GN=Fasn PE=1 SV=3	sp|P12785|FAS_RAT	lLEASHAFEVSDSGNLIVSGk	0.1854	0.1335
Fatty acid synthase OS=Rattus norvegicus GN=Fasn PE=1 SV=3	sp|P12785|FAS_RAT	lLLPEDPLISGLLNSQALk	0.1387	0.2225
Fatty acid synthase OS=Rattus norvegicus GN=Fasn PE=1 SV=3	sp|P12785|FAS_RAT	lQEMSSk	0.06006	0.3234
Fatty acid synthase OS=Rattus norvegicus GN=Fasn PE=1 SV=3	sp|P12785|FAS_RAT	lQTTATSR	-0.1952	0.2451
Fatty acid synthase OS=Rattus norvegicus GN=Fasn PE=1 SV=3	sp|P12785|FAS_RAT	lQVVDRPLPVR	-0.1736	0.1403
Fatty acid synthase OS=Rattus norvegicus GN=Fasn PE=1 SV=3	sp|P12785|FAS_RAT	lSPDAIPGk	-0.1073	0.04208
Fatty acid synthase OS=Rattus norvegicus GN=Fasn PE=1 SV=3	sp|P12785|FAS_RAT	lSPQDkPIFLPVEDTSFQWVDSLk	0.2134	0.02483
Fatty acid synthase OS=Rattus norvegicus GN=Fasn PE=1 SV=3	sp|P12785|FAS_RAT	lTPGcEAEAEAEAIcFFIk	0.06792	0.6504
Fatty acid synthase OS=Rattus norvegicus GN=Fasn PE=1 SV=3	sp|P12785|FAS_RAT	lTQGEVYk	0.01711	-0.02008
Fatty acid synthase OS=Rattus norvegicus GN=Fasn PE=1 SV=3	sp|P12785|FAS_RAT	mTVPGLEDLPQHGLPR	-0.1681	0.05954
Fatty acid synthase OS=Rattus norvegicus GN=Fasn PE=1 SV=3	sp|P12785|FAS_RAT	qAHTMDPQLR	-0.1272	-0.08738
Fatty acid synthase OS=Rattus norvegicus GN=Fasn PE=1 SV=3	sp|P12785|FAS_RAT	qAQLNLSILLVNPEGPTLTR	-0.06927	0.1585
Fatty acid synthase OS=Rattus norvegicus GN=Fasn PE=1 SV=3	sp|P12785|FAS_RAT	qHSQDLAFVSMLNDIAATPTAAMPFR	0.2532	0.1523
Fatty acid synthase OS=Rattus norvegicus GN=Fasn PE=1 SV=3	sp|P12785|FAS_RAT	qQEQLVPTLEk	-0.07766	0.04445
Fatty acid synthase OS=Rattus norvegicus GN=Fasn PE=1 SV=3	sp|P12785|FAS_RAT	qSLQLPTR	-0.1418	0.1665
Fatty acid synthase OS=Rattus norvegicus GN=Fasn PE=1 SV=3	sp|P12785|FAS_RAT	qSPLLIGSTk	-0.03299	0.07935
Fatty acid synthase OS=Rattus norvegicus GN=Fasn PE=1 SV=3	sp|P12785|FAS_RAT	qVQPEGPYR	-0.1611	0.4491
Fatty acid synthase OS=Rattus norvegicus GN=Fasn PE=1 SV=3	sp|P12785|FAS_RAT	rQQEQLVPTLEk	-0.02662	0.2703
Fatty acid synthase OS=Rattus norvegicus GN=Fasn PE=1 SV=3	sp|P12785|FAS_RAT	sDEALkPLGVk	-0.05276	0.09223
Fatty acid synthase OS=Rattus norvegicus GN=Fasn PE=1 SV=3	sp|P12785|FAS_RAT	sFDDSGNGYcR	0.2396	0.1407
Fatty acid synthase OS=Rattus norvegicus GN=Fasn PE=1 SV=3	sp|P12785|FAS_RAT	sLYQPGGVAPESLEYIEAHGTGTk	0.2699	0.07596
Fatty acid synthase OS=Rattus norvegicus GN=Fasn PE=1 SV=3	sp|P12785|FAS_RAT	sLyQPGGVAPESLEYIEAHGTGTk	-0.04326	0.3638
Fatty acid synthase OS=Rattus norvegicus GN=Fasn PE=1 SV=3	sp|P12785|FAS_RAT	sLYQPGGVAPESLEyIEAHGTGTk	0.1281	0.2278
Fatty acid synthase OS=Rattus norvegicus GN=Fasn PE=1 SV=3	sp|P12785|FAS_RAT	sNMGHPEPASGLAALTk	0.08733	0.2264
Fatty acid synthase OS=Rattus norvegicus GN=Fasn PE=1 SV=3	sp|P12785|FAS_RAT	tGGLAFHSYFMEGIAPTLLQALk	0.009768	0.3187
Fatty acid synthase OS=Rattus norvegicus GN=Fasn PE=1 SV=3	sp|P12785|FAS_RAT	tGGTYGEDLGADYNLSQVcDGk	0.1589	0.2037
Fatty acid synthase OS=Rattus norvegicus GN=Fasn PE=1 SV=3	sp|P12785|FAS_RAT	tGGTyGEDLGADYNLSQVcDGk	0.27	-0.08861
Fatty acid synthase OS=Rattus norvegicus GN=Fasn PE=1 SV=3	sp|P12785|FAS_RAT	tGGTYGEDLGADyNLSQVcDGk	0.2026	0.08789
Fatty acid synthase OS=Rattus norvegicus GN=Fasn PE=1 SV=3	sp|P12785|FAS_RAT	tGTVPLEVR	-0.05708	0.04465
Fatty acid synthase OS=Rattus norvegicus GN=Fasn PE=1 SV=3	sp|P12785|FAS_RAT	tMEAVQGLLEQGR	0.05453	0.06236
Fatty acid synthase OS=Rattus norvegicus GN=Fasn PE=1 SV=3	sp|P12785|FAS_RAT	vAAAVDLITR	-0.03611	-0.02029
Fatty acid synthase OS=Rattus norvegicus GN=Fasn PE=1 SV=3	sp|P12785|FAS_RAT	vFTTVGSAEk	-0.09975	0.2131
Fatty acid synthase OS=Rattus norvegicus GN=Fasn PE=1 SV=3	sp|P12785|FAS_RAT	vGDPQELNGITR	-0.2161	-0.09021
Fatty acid synthase OS=Rattus norvegicus GN=Fasn PE=1 SV=3	sp|P12785|FAS_RAT	vHLTGIDINPNALFPPVEFPVPR	0.1131	-0.005773
Fatty acid synthase OS=Rattus norvegicus GN=Fasn PE=1 SV=3	sp|P12785|FAS_RAT	vLEALLPLk	-0.236	0.1133
Fatty acid synthase OS=Rattus norvegicus GN=Fasn PE=1 SV=3	sp|P12785|FAS_RAT	vLESDLVMNVYR	0.09712	0.1655
Fatty acid synthase OS=Rattus norvegicus GN=Fasn PE=1 SV=3	sp|P12785|FAS_RAT	vLLSLENGVWAPNLHFHNPNPEIPALLDGR	-0.2268	0.2163
Fatty acid synthase OS=Rattus norvegicus GN=Fasn PE=1 SV=3	sp|P12785|FAS_RAT	vSVHIIEGDHR	0.2045	0.03568
Fatty acid synthase OS=Rattus norvegicus GN=Fasn PE=1 SV=3	sp|P12785|FAS_RAT	vTAIYIDPATHLQk	-0.1867	0.08762
Fatty acid synthase OS=Rattus norvegicus GN=Fasn PE=1 SV=3	sp|P12785|FAS_RAT	vYMLEGDTQVADVTTSR	0.1303	0.1045
Fatty acid synthase OS=Rattus norvegicus GN=Fasn PE=1 SV=3	sp|P12785|FAS_RAT	vYQWEDPDSk	0.09702	0.1666
Fatty acid synthase OS=Rattus norvegicus GN=Fasn PE=1 SV=3	sp|P12785|FAS_RAT	vyQWEDPDSk	0.09392	0.1985
Fatty acid synthase OS=Rattus norvegicus GN=Fasn PE=1 SV=3	sp|P12785|FAS_RAT	wLSTSIPEAQWQSSLAR	-0.08413	0.2036
Fatty acid synthase OS=Rattus norvegicus GN=Fasn PE=1 SV=3	sp|P12785|FAS_RAT	wVSSPLk	-0.02405	0.2364
Fatty acid synthase OS=Rattus norvegicus GN=Fasn PE=1 SV=3	sp|P12785|FAS_RAT	yNGTLNLDR	0.2106	0.241
Ribonuclease UK114 OS=Rattus norvegicus GN=Hrsp12 PE=1 SV=3	sp|P52759|UK114_RAT	aAGcDFTNVVk	-0.1345	0.3293
Ribonuclease UK114 OS=Rattus norvegicus GN=Hrsp12 PE=1 SV=3	sp|P52759|UK114_RAT	aAYQVAALPk	-0.09574	0.3511
Ribonuclease UK114 OS=Rattus norvegicus GN=Hrsp12 PE=1 SV=3	sp|P52759|UK114_RAT	aPAAIGAYSQAVLVDR	-0.05794	0.07944
Ribonuclease UK114 OS=Rattus norvegicus GN=Hrsp12 PE=1 SV=3	sp|P52759|UK114_RAT	aPAAIGAySQAVLVDR	-0.2866	0.04329
Ribonuclease UK114 OS=Rattus norvegicus GN=Hrsp12 PE=1 SV=3	sp|P52759|UK114_RAT	iEIEAIAVQGPFTTAGL	-0.2077	0.264
Ribonuclease UK114 OS=Rattus norvegicus GN=Hrsp12 PE=1 SV=3	sp|P52759|UK114_RAT	kVISTSk	0.03083	0.1593
Ribonuclease UK114 OS=Rattus norvegicus GN=Hrsp12 PE=1 SV=3	sp|P52759|UK114_RAT	nLGEILk	-0.117	0.2786
Ribonuclease UK114 OS=Rattus norvegicus GN=Hrsp12 PE=1 SV=3	sp|P52759|UK114_RAT	tIYVSGQIGMDPSSGQLVPGGVAEEAk	0.2688	0.1377
Ribonuclease UK114 OS=Rattus norvegicus GN=Hrsp12 PE=1 SV=3	sp|P52759|UK114_RAT	tIyVSGQIGMDPSSGQLVPGGVAEEAk	0.04639	0.1952
Ribonuclease UK114 OS=Rattus norvegicus GN=Hrsp12 PE=1 SV=3	sp|P52759|UK114_RAT	tTVLLADINDFGTVNEIYk	0.2849	0.2424
Ribonuclease UK114 OS=Rattus norvegicus GN=Hrsp12 PE=1 SV=3	sp|P52759|UK114_RAT	tYFQGNLPAR	-0.07643	0.203
Delta-1-pyrroline-5-carboxylate dehydrogenase, mitochondrial OS=Rattus norvegicus GN=Aldh4a1 PE=1 SV=1	sp|P0C2X9|AL4A1_RAT	aADMLSGPR	-0.1298	0.02449
Delta-1-pyrroline-5-carboxylate dehydrogenase, mitochondrial OS=Rattus norvegicus GN=Aldh4a1 PE=1 SV=1	sp|P0C2X9|AL4A1_RAT	aIEAAVLAR	-0.2501	0.1514
Delta-1-pyrroline-5-carboxylate dehydrogenase, mitochondrial OS=Rattus norvegicus GN=Aldh4a1 PE=1 SV=1	sp|P0C2X9|AL4A1_RAT	aLNDLkDQTEAIPcVVGDEEVWTSDVR	-0.1703	-0.2324
Delta-1-pyrroline-5-carboxylate dehydrogenase, mitochondrial OS=Rattus norvegicus GN=Aldh4a1 PE=1 SV=1	sp|P0C2X9|AL4A1_RAT	dPQEPIMk	-0.00928	0.02368
Delta-1-pyrroline-5-carboxylate dehydrogenase, mitochondrial OS=Rattus norvegicus GN=Aldh4a1 PE=1 SV=1	sp|P0C2X9|AL4A1_RAT	dPQEPIMkEEIFGPVLTVYVYPDEk	-0.0133	0.08437
Delta-1-pyrroline-5-carboxylate dehydrogenase, mitochondrial OS=Rattus norvegicus GN=Aldh4a1 PE=1 SV=1	sp|P0C2X9|AL4A1_RAT	dQTEAIPcVVGDEEVWTSDVR	0.1382	-0.1728
Delta-1-pyrroline-5-carboxylate dehydrogenase, mitochondrial OS=Rattus norvegicus GN=Aldh4a1 PE=1 SV=1	sp|P0C2X9|AL4A1_RAT	eEIFGPVLTVYVYPDEk	0.2828	0.09159
Delta-1-pyrroline-5-carboxylate dehydrogenase, mitochondrial OS=Rattus norvegicus GN=Aldh4a1 PE=1 SV=1	sp|P0C2X9|AL4A1_RAT	eTLQLVDSTTSYGLTGAVFAQDk	0.2392	0.1928
Delta-1-pyrroline-5-carboxylate dehydrogenase, mitochondrial OS=Rattus norvegicus GN=Aldh4a1 PE=1 SV=1	sp|P0C2X9|AL4A1_RAT	eTLQLVDSTTSyGLTGAVFAQDk	0.4566	-0.07286
Delta-1-pyrroline-5-carboxylate dehydrogenase, mitochondrial OS=Rattus norvegicus GN=Aldh4a1 PE=1 SV=1	sp|P0C2X9|AL4A1_RAT	eWDLkPVADR	0.0792	-0.234
Delta-1-pyrroline-5-carboxylate dehydrogenase, mitochondrial OS=Rattus norvegicus GN=Aldh4a1 PE=1 SV=1	sp|P0C2X9|AL4A1_RAT	kEWDLkPVADR	0.04238	-0.1134
Delta-1-pyrroline-5-carboxylate dehydrogenase, mitochondrial OS=Rattus norvegicus GN=Aldh4a1 PE=1 SV=1	sp|P0C2X9|AL4A1_RAT	lAGEcGGk	-0.2068	0.1424
Delta-1-pyrroline-5-carboxylate dehydrogenase, mitochondrial OS=Rattus norvegicus GN=Aldh4a1 PE=1 SV=1	sp|P0C2X9|AL4A1_RAT	lLEEHSR	0.6989	-0.1385
Delta-1-pyrroline-5-carboxylate dehydrogenase, mitochondrial OS=Rattus norvegicus GN=Aldh4a1 PE=1 SV=1	sp|P0C2X9|AL4A1_RAT	lYVPQSLWPQIk	-0.2329	-0.09213
Delta-1-pyrroline-5-carboxylate dehydrogenase, mitochondrial OS=Rattus norvegicus GN=Aldh4a1 PE=1 SV=1	sp|P0C2X9|AL4A1_RAT	nAAGNFYINDk	0.08818	0.1234
Delta-1-pyrroline-5-carboxylate dehydrogenase, mitochondrial OS=Rattus norvegicus GN=Aldh4a1 PE=1 SV=1	sp|P0C2X9|AL4A1_RAT	nAAGNFyINDk	0.1181	0.1461
Delta-1-pyrroline-5-carboxylate dehydrogenase, mitochondrial OS=Rattus norvegicus GN=Aldh4a1 PE=1 SV=1	sp|P0C2X9|AL4A1_RAT	qVAQNLDR	-0.08338	-0.02097
Delta-1-pyrroline-5-carboxylate dehydrogenase, mitochondrial OS=Rattus norvegicus GN=Aldh4a1 PE=1 SV=1	sp|P0C2X9|AL4A1_RAT	rAEILAk	-0.09503	-0.008787
Delta-1-pyrroline-5-carboxylate dehydrogenase, mitochondrial OS=Rattus norvegicus GN=Aldh4a1 PE=1 SV=1	sp|P0C2X9|AL4A1_RAT	sAFEYGGQk	0.1792	0.04514
Delta-1-pyrroline-5-carboxylate dehydrogenase, mitochondrial OS=Rattus norvegicus GN=Aldh4a1 PE=1 SV=1	sp|P0C2X9|AL4A1_RAT	sSPSLSILAGGQcNESVGYFVEPcIIESk	0.3206	0.1371
Delta-1-pyrroline-5-carboxylate dehydrogenase, mitochondrial OS=Rattus norvegicus GN=Aldh4a1 PE=1 SV=1	sp|P0C2X9|AL4A1_RAT	sSPSLSILAGGQcNESVGyFVEPcIIESk	0.4765	0.03343
Delta-1-pyrroline-5-carboxylate dehydrogenase, mitochondrial OS=Rattus norvegicus GN=Aldh4a1 PE=1 SV=1	sp|P0C2X9|AL4A1_RAT	sTGSVVGQQPFGGAR	-0.05857	0.06291
Delta-1-pyrroline-5-carboxylate dehydrogenase, mitochondrial OS=Rattus norvegicus GN=Aldh4a1 PE=1 SV=1	sp|P0C2X9|AL4A1_RAT	tIVQEATR	-0.3183	-0.126
Delta-1-pyrroline-5-carboxylate dehydrogenase, mitochondrial OS=Rattus norvegicus GN=Aldh4a1 PE=1 SV=1	sp|P0C2X9|AL4A1_RAT	tMVGQGk	-0.08403	0.07162
Delta-1-pyrroline-5-carboxylate dehydrogenase, mitochondrial OS=Rattus norvegicus GN=Aldh4a1 PE=1 SV=1	sp|P0C2X9|AL4A1_RAT	tVIQAEIDAAAELIDFFR	0.1979	0.00518
Delta-1-pyrroline-5-carboxylate dehydrogenase, mitochondrial OS=Rattus norvegicus GN=Aldh4a1 PE=1 SV=1	sp|P0C2X9|AL4A1_RAT	vANEPILAFTQGSPER	0.001014	0.03843
Delta-1-pyrroline-5-carboxylate dehydrogenase, mitochondrial OS=Rattus norvegicus GN=Aldh4a1 PE=1 SV=1	sp|P0C2X9|AL4A1_RAT	vGNPAEDFGTFFSAVIDAk	0.1621	0.05868
Delta-1-pyrroline-5-carboxylate dehydrogenase, mitochondrial OS=Rattus norvegicus GN=Aldh4a1 PE=1 SV=1	sp|P0C2X9|AL4A1_RAT	yQLSPFNHGHk	-0.2174	0.03062
Argininosuccinate synthase OS=Rattus norvegicus GN=Ass1 PE=2 SV=1	sp|P09034|ASSY_RAT	aPNTPDVLEIEFk	0.1775	0.1156
Argininosuccinate synthase OS=Rattus norvegicus GN=Ass1 PE=2 SV=1	sp|P09034|ASSY_RAT	aPNTPDVLEIEFkk	-0.3433	0.429
Argininosuccinate synthase OS=Rattus norvegicus GN=Ass1 PE=2 SV=1	sp|P09034|ASSY_RAT	dGTTHSTSLDLFMyLNEVAGk	0.3102	0.2712
Argininosuccinate synthase OS=Rattus norvegicus GN=Ass1 PE=2 SV=1	sp|P09034|ASSY_RAT	eDFEEAR	0.1976	1.006
Argininosuccinate synthase OS=Rattus norvegicus GN=Ass1 PE=2 SV=1	sp|P09034|ASSY_RAT	eFVEEFIWPAVQSSALyEDR	0.4805	0.2736
Argininosuccinate synthase OS=Rattus norvegicus GN=Ass1 PE=2 SV=1	sp|P09034|ASSY_RAT	eQGYDVIAYLANIGQk	0.2993	0.6129
Argininosuccinate synthase OS=Rattus norvegicus GN=Ass1 PE=2 SV=1	sp|P09034|ASSY_RAT	fAELVYTGFWHSPEcEFVR	0.1887	0.2457
Argininosuccinate synthase OS=Rattus norvegicus GN=Ass1 PE=2 SV=1	sp|P09034|ASSY_RAT	fAELVyTGFWHSPEcEFVR	0.08105	0.334
Argininosuccinate synthase OS=Rattus norvegicus GN=Ass1 PE=2 SV=1	sp|P09034|ASSY_RAT	fELTcYSLAPQIk	-0.1844	0.1896
Argininosuccinate synthase OS=Rattus norvegicus GN=Ass1 PE=2 SV=1	sp|P09034|ASSY_RAT	gIYETPAGTILYHAHLDIEAFTMDR	0.2056	0.2075
Argininosuccinate synthase OS=Rattus norvegicus GN=Ass1 PE=2 SV=1	sp|P09034|ASSY_RAT	gQVYILGR	-0.07512	0.2048
Argininosuccinate synthase OS=Rattus norvegicus GN=Ass1 PE=2 SV=1	sp|P09034|ASSY_RAT	gRNDLMEYAk	0.02709	0.1216
Argininosuccinate synthase OS=Rattus norvegicus GN=Ass1 PE=2 SV=1	sp|P09034|ASSY_RAT	gRNDLMEyAk	0.0009156	0.1517
Argininosuccinate synthase OS=Rattus norvegicus GN=Ass1 PE=2 SV=1	sp|P09034|ASSY_RAT	iDIVENR	-0.09827	0.1229
Argininosuccinate synthase OS=Rattus norvegicus GN=Ass1 PE=2 SV=1	sp|P09034|ASSY_RAT	kQVEIAQR	-0.1139	0.07599
Argininosuccinate synthase OS=Rattus norvegicus GN=Ass1 PE=2 SV=1	sp|P09034|ASSY_RAT	kVFIEDVSk	0.06289	0.3507
Argininosuccinate synthase OS=Rattus norvegicus GN=Ass1 PE=2 SV=1	sp|P09034|ASSY_RAT	mPEFYNR	-0.004244	0.1655
Argininosuccinate synthase OS=Rattus norvegicus GN=Ass1 PE=2 SV=1	sp|P09034|ASSY_RAT	nDLMEYAk	0.06931	0.6099
Argininosuccinate synthase OS=Rattus norvegicus GN=Ass1 PE=2 SV=1	sp|P09034|ASSY_RAT	nDLMEyAk	0.1647	0.4401
Argininosuccinate synthase OS=Rattus norvegicus GN=Ass1 PE=2 SV=1	sp|P09034|ASSY_RAT	nQAPPGLYTk	0.03994	0.2504
Argininosuccinate synthase OS=Rattus norvegicus GN=Ass1 PE=2 SV=1	sp|P09034|ASSY_RAT	qHGIPIPVTPk	-0.1817	0.2272
Argininosuccinate synthase OS=Rattus norvegicus GN=Ass1 PE=2 SV=1	sp|P09034|ASSY_RAT	qVEIAQR	-0.2113	0.1532
Argininosuccinate synthase OS=Rattus norvegicus GN=Ass1 PE=2 SV=1	sp|P09034|ASSY_RAT	sPWSMDENLMHISYEAGILENPk	0.4537	0.2158
Argininosuccinate synthase OS=Rattus norvegicus GN=Ass1 PE=2 SV=1	sp|P09034|ASSY_RAT	sPWSMDENLMHISyEAGILENPk	0.501	0.2531
Argininosuccinate synthase OS=Rattus norvegicus GN=Ass1 PE=2 SV=1	sp|P09034|ASSY_RAT	tQDPAkAPNTPDVLEIEFk	-0.5688	-0.1568
Argininosuccinate synthase OS=Rattus norvegicus GN=Ass1 PE=2 SV=1	sp|P09034|ASSY_RAT	tQDPAkAPNTPDVLEIEFkk	-0.6158	-0.4602
Argininosuccinate synthase OS=Rattus norvegicus GN=Ass1 PE=2 SV=1	sp|P09034|ASSY_RAT	vFIEDVSk	0.004483	0.1935
Argininosuccinate synthase OS=Rattus norvegicus GN=Ass1 PE=2 SV=1	sp|P09034|ASSY_RAT	vQVSVFk	-0.03364	0.3379
Argininosuccinate synthase OS=Rattus norvegicus GN=Ass1 PE=2 SV=1	sp|P09034|ASSY_RAT	yVSHGATGk	0.06348	0.1833
Hemoglobin subunit alpha-1/2 OS=Rattus norvegicus GN=Hba1 PE=1 SV=3	sp|P01946|HBA_RAT	aADHVEDLPGALSTLSDLHAHk	0.1662	0.5302
Hemoglobin subunit alpha-1/2 OS=Rattus norvegicus GN=Hba1 PE=1 SV=3	sp|P01946|HBA_RAT	fLASVSTVLTSk	0.1459	0.6621
Hemoglobin subunit alpha-1/2 OS=Rattus norvegicus GN=Hba1 PE=1 SV=3	sp|P01946|HBA_RAT	fLSHcLLVTLAcHHPGDFTPAMHASLDk	0.528	0.6555
Hemoglobin subunit alpha-1/2 OS=Rattus norvegicus GN=Hba1 PE=1 SV=3	sp|P01946|HBA_RAT	iGGHGGEYGEEALQR	0.1599	0.4677
Hemoglobin subunit alpha-1/2 OS=Rattus norvegicus GN=Hba1 PE=1 SV=3	sp|P01946|HBA_RAT	iGGHGGEyGEEALQR	0.1154	0.4418
Hemoglobin subunit alpha-1/2 OS=Rattus norvegicus GN=Hba1 PE=1 SV=3	sp|P01946|HBA_RAT	kVADALAk	-0.07915	0.6685
Hemoglobin subunit alpha-1/2 OS=Rattus norvegicus GN=Hba1 PE=1 SV=3	sp|P01946|HBA_RAT	lRVDPVNFk	-0.2704	0.7578
Hemoglobin subunit alpha-1/2 OS=Rattus norvegicus GN=Hba1 PE=1 SV=3	sp|P01946|HBA_RAT	mFAAFPTTk	0.002882	0.6415
Hemoglobin subunit alpha-1/2 OS=Rattus norvegicus GN=Hba1 PE=1 SV=3	sp|P01946|HBA_RAT	tYFSHIDVSPGSAQVk	0.1558	0.5456
Hemoglobin subunit alpha-1/2 OS=Rattus norvegicus GN=Hba1 PE=1 SV=3	sp|P01946|HBA_RAT	tyFSHIDVSPGSAQVk	0.1769	0.6541
Hemoglobin subunit alpha-1/2 OS=Rattus norvegicus GN=Hba1 PE=1 SV=3	sp|P01946|HBA_RAT	vADALAk	-0.05274	0.579
Hemoglobin subunit alpha-1/2 OS=Rattus norvegicus GN=Hba1 PE=1 SV=3	sp|P01946|HBA_RAT	vDPVNFk	0.03597	0.68
Hemoglobin subunit alpha-1/2 OS=Rattus norvegicus GN=Hba1 PE=1 SV=3	sp|P01946|HBA_RAT	vLSADDk	0.03761	0.896
Hemoglobin subunit alpha-1/2 OS=Rattus norvegicus GN=Hba1 PE=1 SV=3	sp|P01946|HBA_RAT	vLSADDkTNIk	-0.3321	0.797
Enoyl-CoA hydratase, mitochondrial OS=Rattus norvegicus GN=Echs1 PE=1 SV=1	sp|P14604|ECHM_RAT	aFAAGADIk	-0.04965	0.04964	0	3	30	2
Enoyl-CoA hydratase, mitochondrial OS=Rattus norvegicus GN=Echs1 PE=1 SV=1	sp|P14604|ECHM_RAT	aLNALcNGLIEELNQALETFEEDPAVGAIVLTGGEk	0.1161	0.052	0	1	0	1
Enoyl-CoA hydratase, mitochondrial OS=Rattus norvegicus GN=Echs1 PE=1 SV=1	sp|P14604|ECHM_RAT	aQFGQPEILLGTIPGAGGTQR	0.1541	0.05426	0	3	6	0
Enoyl-CoA hydratase, mitochondrial OS=Rattus norvegicus GN=Echs1 PE=1 SV=1	sp|P14604|ECHM_RAT	eGMSAFVEk	0.2404	0.07041	0	6	23	4
Enoyl-CoA hydratase, mitochondrial OS=Rattus norvegicus GN=Echs1 PE=1 SV=1	sp|P14604|ECHM_RAT	eGMSAFVEkR	-0.1358	-0.3332	0	0	1	0
Enoyl-CoA hydratase, mitochondrial OS=Rattus norvegicus GN=Echs1 PE=1 SV=1	sp|P14604|ECHM_RAT	eSVNAAFEMTLTEGNk	0.4246	0.1801	0	6	146	129
Enoyl-CoA hydratase, mitochondrial OS=Rattus norvegicus GN=Echs1 PE=1 SV=1	sp|P14604|ECHM_RAT	eSVNAAFEMTLTEGNkLEk	0.1907	0.2047	0	4	27	81
Enoyl-CoA hydratase, mitochondrial OS=Rattus norvegicus GN=Echs1 PE=1 SV=1	sp|P14604|ECHM_RAT	fLSHWDHITR	-0.1203	-0.04112	0	0	2	2
Enoyl-CoA hydratase, mitochondrial OS=Rattus norvegicus GN=Echs1 PE=1 SV=1	sp|P14604|ECHM_RAT	iFPVETLVEEAIQcAEk	0.1305	0.1185	0	0	8	11
Enoyl-CoA hydratase, mitochondrial OS=Rattus norvegicus GN=Echs1 PE=1 SV=1	sp|P14604|ECHM_RAT	iIVAMAk	-0.09908	0.1585	0	4	6	0
Enoyl-CoA hydratase, mitochondrial OS=Rattus norvegicus GN=Echs1 PE=1 SV=1	sp|P14604|ECHM_RAT	iSAQDAk	-0.0889	0.08974	0	7	0	0
Enoyl-CoA hydratase, mitochondrial OS=Rattus norvegicus GN=Echs1 PE=1 SV=1	sp|P14604|ECHM_RAT	lFYSTFATDDR	0.1528	0.1587	0	3	0	0
Enoyl-CoA hydratase, mitochondrial OS=Rattus norvegicus GN=Echs1 PE=1 SV=1	sp|P14604|ECHM_RAT	nSSVGLIQLNRPk	-0.08877	0.09889	0	0	9	3
Enoyl-CoA hydratase, mitochondrial OS=Rattus norvegicus GN=Echs1 PE=1 SV=1	sp|P14604|ECHM_RAT	qAGLVSk	-0.1871	-0.004462	0	9	1	0
Enoyl-CoA hydratase, mitochondrial OS=Rattus norvegicus GN=Echs1 PE=1 SV=1	sp|P14604|ECHM_RAT	sLAMEMVLTGDR	0.07126	0.04727	0	44	28	0
Enoyl-CoA hydratase, mitochondrial OS=Rattus norvegicus GN=Echs1 PE=1 SV=1	sp|P14604|ECHM_RAT	tFQDcYSGk	0.08275	0.01606	0	3	42	1
Enoyl-CoA hydratase, mitochondrial OS=Rattus norvegicus GN=Echs1 PE=1 SV=1	sp|P14604|ECHM_RAT	tFQDcySGk	0.1263	0.001004	0	0	1	1
Protein disulfide-isomerase OS=Rattus norvegicus GN=P4hb PE=1 SV=2	sp|P04785|PDIA1_RAT	aLAPEYAk	-0.1001	-0.05759	0	4	12	0
Protein disulfide-isomerase OS=Rattus norvegicus GN=P4hb PE=1 SV=2	sp|P04785|PDIA1_RAT	dAGSDSAk	0.7123	0.8485	0	0	2	0
Protein disulfide-isomerase OS=Rattus norvegicus GN=P4hb PE=1 SV=2	sp|P04785|PDIA1_RAT	dGVVLFk	0.08303	-0.2137	0	13	7	0
Protein disulfide-isomerase OS=Rattus norvegicus GN=P4hb PE=1 SV=2	sp|P04785|PDIA1_RAT	dHENIVIAk	-0.2254	-0.2548	0	2	3	4
Protein disulfide-isomerase OS=Rattus norvegicus GN=P4hb PE=1 SV=2	sp|P04785|PDIA1_RAT	eADDIVNWLk	0.1109	-0.06584	0	4	49	0
Protein disulfide-isomerase OS=Rattus norvegicus GN=P4hb PE=1 SV=2	sp|P04785|PDIA1_RAT	eEcPAVR	-0.6583	0.06602	0	1	0	0
Protein disulfide-isomerase OS=Rattus norvegicus GN=P4hb PE=1 SV=2	sp|P04785|PDIA1_RAT	fFPASADR	-0.1077	-0.249	0	5	0	0
Protein disulfide-isomerase OS=Rattus norvegicus GN=P4hb PE=1 SV=2	sp|P04785|PDIA1_RAT	fLESGGQDGAGDNDDLDLEEALEPDMEEDDDQk	0.5115	-0.2592	0	0	0	23
Protein disulfide-isomerase OS=Rattus norvegicus GN=P4hb PE=1 SV=2	sp|P04785|PDIA1_RAT	hNQLPLVIEFTEQTAPk	-0.03405	-0.1512	0	0	6	28
Protein disulfide-isomerase OS=Rattus norvegicus GN=P4hb PE=1 SV=2	sp|P04785|PDIA1_RAT	iFGGEIk	-0.07454	-0.1072	0	7	0	0
Protein disulfide-isomerase OS=Rattus norvegicus GN=P4hb PE=1 SV=2	sp|P04785|PDIA1_RAT	ikPHLMSQELPEDWDk	0.2442	-0.0736	0	0	0	4
Protein disulfide-isomerase OS=Rattus norvegicus GN=P4hb PE=1 SV=2	sp|P04785|PDIA1_RAT	ikPHLMSQELPEDWDkQPVk	0.09035	-0.0175	0	0	1	0
Protein disulfide-isomerase OS=Rattus norvegicus GN=P4hb PE=1 SV=2	sp|P04785|PDIA1_RAT	iLEFFGLk	-0.121	-0.06784	0	4	13	0
Protein disulfide-isomerase OS=Rattus norvegicus GN=P4hb PE=1 SV=2	sp|P04785|PDIA1_RAT	iLFIFIDSDHTDNQR	-0.2052	-0.1707	0	0	6	0
Protein disulfide-isomerase OS=Rattus norvegicus GN=P4hb PE=1 SV=2	sp|P04785|PDIA1_RAT	iTQFcHHFLEGk	-0.04128	-0.08312	0	0	0	3
Protein disulfide-isomerase OS=Rattus norvegicus GN=P4hb PE=1 SV=2	sp|P04785|PDIA1_RAT	kEEcPAVR	-0.06003	-0.2087	0	0	6	2
Protein disulfide-isomerase OS=Rattus norvegicus GN=P4hb PE=1 SV=2	sp|P04785|PDIA1_RAT	lGETYkDHENIVIAk	0.00121	-0.05177	0	0	3	9
Protein disulfide-isomerase OS=Rattus norvegicus GN=P4hb PE=1 SV=2	sp|P04785|PDIA1_RAT	lITLEEEMTk	-0.03002	-0.03235	0	5	99	4
Protein disulfide-isomerase OS=Rattus norvegicus GN=P4hb PE=1 SV=2	sp|P04785|PDIA1_RAT	lkAEGSEIR	-0.0925	-0.07809	0	1	1	0
Protein disulfide-isomerase OS=Rattus norvegicus GN=P4hb PE=1 SV=2	sp|P04785|PDIA1_RAT	mDSTANEVEAVk	0.01231	-0.1173	0	3	12	3
Protein disulfide-isomerase OS=Rattus norvegicus GN=P4hb PE=1 SV=2	sp|P04785|PDIA1_RAT	nFEEVAFDEk	0.163	-0.1074	0	2	16	1
Protein disulfide-isomerase OS=Rattus norvegicus GN=P4hb PE=1 SV=2	sp|P04785|PDIA1_RAT	nFEEVAFDEkk	-0.2286	0.139	0	0	3	4
Protein disulfide-isomerase OS=Rattus norvegicus GN=P4hb PE=1 SV=2	sp|P04785|PDIA1_RAT	nGDTASPk	0.4204	0.365	0	1	0	0
Protein disulfide-isomerase OS=Rattus norvegicus GN=P4hb PE=1 SV=2	sp|P04785|PDIA1_RAT	nNFEGEITk	-0.03865	-0.1768	0	5	10	1
Protein disulfide-isomerase OS=Rattus norvegicus GN=P4hb PE=1 SV=2	sp|P04785|PDIA1_RAT	qLAPIWDk	-0.1305	-0.002776	0	5	8	1
Protein disulfide-isomerase OS=Rattus norvegicus GN=P4hb PE=1 SV=2	sp|P04785|PDIA1_RAT	sVSDYDGk	0.07806	-0.3074	0	6	3	0
Protein disulfide-isomerase OS=Rattus norvegicus GN=P4hb PE=1 SV=2	sp|P04785|PDIA1_RAT	tGPAATTLSDTAAAESLVDSSEVTVIGFFk	0.09563	-0.01008	0	1	2	5
Protein disulfide-isomerase OS=Rattus norvegicus GN=P4hb PE=1 SV=2	sp|P04785|PDIA1_RAT	tHILLFLPk	-0.1002	-0.06106	0	1	9	3
Protein disulfide-isomerase OS=Rattus norvegicus GN=P4hb PE=1 SV=2	sp|P04785|PDIA1_RAT	tLDGFkk	-0.07076	0.03594	0	1	3	1
Protein disulfide-isomerase OS=Rattus norvegicus GN=P4hb PE=1 SV=2	sp|P04785|PDIA1_RAT	tVIDYNGER	-0.02958	-0.2395	0	12	1	0
Protein disulfide-isomerase OS=Rattus norvegicus GN=P4hb PE=1 SV=2	sp|P04785|PDIA1_RAT	tVIDyNGER	-0.05622	-0.1323	0	1	3	0
Protein disulfide-isomerase OS=Rattus norvegicus GN=P4hb PE=1 SV=2	sp|P04785|PDIA1_RAT	vDATEESDLAQQYGVR	-0.117	-0.08993	0	10	88	4
Protein disulfide-isomerase OS=Rattus norvegicus GN=P4hb PE=1 SV=2	sp|P04785|PDIA1_RAT	vDATEESDLAQQyGVR	-0.2003	-0.3424	0	0	4	1
Protein disulfide-isomerase OS=Rattus norvegicus GN=P4hb PE=1 SV=2	sp|P04785|PDIA1_RAT	vHSFPTLk	-0.07947	-0.09461	0	0	7	0
Protein disulfide-isomerase OS=Rattus norvegicus GN=P4hb PE=1 SV=2	sp|P04785|PDIA1_RAT	ykPESDELTAEk	0.1698	-0.2115	0	5	2	1
Protein disulfide-isomerase OS=Rattus norvegicus GN=P4hb PE=1 SV=2	sp|P04785|PDIA1_RAT	ykPESDELTAEk	0.2823	-0.1892	0	0	1	0
Protein disulfide-isomerase OS=Rattus norvegicus GN=P4hb PE=1 SV=2	sp|P04785|PDIA1_RAT	yQLDkDGVVLFk	-0.02859	0.01433	0	0	5	18
Aspartate aminotransferase, mitochondrial OS=Rattus norvegicus GN=Got2 PE=1 SV=2	sp|P00507|AATM_RAT	aEAQIAGk	-0.0717	-0.06181	0	6	0	0
Aspartate aminotransferase, mitochondrial OS=Rattus norvegicus GN=Got2 PE=1 SV=2	sp|P00507|AATM_RAT	aSAELALGENSEVLk	0.1763	0.1713	0	11	24	1
Aspartate aminotransferase, mitochondrial OS=Rattus norvegicus GN=Got2 PE=1 SV=2	sp|P00507|AATM_RAT	dAGMQLQGYR	0.2383	-0.06173	0	35	8	0
Aspartate aminotransferase, mitochondrial OS=Rattus norvegicus GN=Got2 PE=1 SV=2	sp|P00507|AATM_RAT	dAGMQLQGyR	0.4117	0.1237	0	0	1	0
Aspartate aminotransferase, mitochondrial OS=Rattus norvegicus GN=Got2 PE=1 SV=2	sp|P00507|AATM_RAT	dDNGkPYVLPSVR	0.087	-0.008319	0	1	17	32
Aspartate aminotransferase, mitochondrial OS=Rattus norvegicus GN=Got2 PE=1 SV=2	sp|P00507|AATM_RAT	dDNGkPyVLPSVR	-0.0711	-0.2439	0	0	0	2
Aspartate aminotransferase, mitochondrial OS=Rattus norvegicus GN=Got2 PE=1 SV=2	sp|P00507|AATM_RAT	eFSVYMTk	0.01114	0.1882	0	5	19	2
Aspartate aminotransferase, mitochondrial OS=Rattus norvegicus GN=Got2 PE=1 SV=2	sp|P00507|AATM_RAT	eMAAVVk	-0.08734	0.02517	0	15	51	0
Aspartate aminotransferase, mitochondrial OS=Rattus norvegicus GN=Got2 PE=1 SV=2	sp|P00507|AATM_RAT	eYLPIGGLADFck	0.2104	-0.02165	0	2	9	3
Aspartate aminotransferase, mitochondrial OS=Rattus norvegicus GN=Got2 PE=1 SV=2	sp|P00507|AATM_RAT	fVTVQTISGTGALR	-0.06904	0.1348	0	15	2	0
Aspartate aminotransferase, mitochondrial OS=Rattus norvegicus GN=Got2 PE=1 SV=2	sp|P00507|AATM_RAT	iAATILTSPDLR	-0.05987	0.02052	0	14	1	0
Aspartate aminotransferase, mitochondrial OS=Rattus norvegicus GN=Got2 PE=1 SV=2	sp|P00507|AATM_RAT	iLIRPLYSNPPLNGAR	0.06187	0.09751	0	0	6	0
Aspartate aminotransferase, mitochondrial OS=Rattus norvegicus GN=Got2 PE=1 SV=2	sp|P00507|AATM_RAT	iLIRPLySNPPLNGAR	0.02402	0.3797	0	0	0	1
Aspartate aminotransferase, mitochondrial OS=Rattus norvegicus GN=Got2 PE=1 SV=2	sp|P00507|AATM_RAT	iPEQSVLLLHAcAHNPTGVDPRPEQWk	0.1314	0.09382	0	0	0	0
Aspartate aminotransferase, mitochondrial OS=Rattus norvegicus GN=Got2 PE=1 SV=2	sp|P00507|AATM_RAT	iSVAGVTSGNVGYLAHAIHQVTk	0.151	0.08816	0	0	0	1
Aspartate aminotransferase, mitochondrial OS=Rattus norvegicus GN=Got2 PE=1 SV=2	sp|P00507|AATM_RAT	kAEAQIAGk	-0.05922	0.1398	0	3	2	2
Aspartate aminotransferase, mitochondrial OS=Rattus norvegicus GN=Got2 PE=1 SV=2	sp|P00507|AATM_RAT	kMNLGVGAYR	-0.7206	0.5435	0	0	0	1
Aspartate aminotransferase, mitochondrial OS=Rattus norvegicus GN=Got2 PE=1 SV=2	sp|P00507|AATM_RAT	kQWLQEVk	0.01695	0.1497	0	6	9	6
Aspartate aminotransferase, mitochondrial OS=Rattus norvegicus GN=Got2 PE=1 SV=2	sp|P00507|AATM_RAT	mNLGVGAYR	-0.07357	0.004597	0	11	3	0
Aspartate aminotransferase, mitochondrial OS=Rattus norvegicus GN=Got2 PE=1 SV=2	sp|P00507|AATM_RAT	nLDkEYLPIGGLADFck	0.05835	0.1431	0	0	5	28
Aspartate aminotransferase, mitochondrial OS=Rattus norvegicus GN=Got2 PE=1 SV=2	sp|P00507|AATM_RAT	nMGLYGER	0.06191	-0.04649	0	13	1	0
Aspartate aminotransferase, mitochondrial OS=Rattus norvegicus GN=Got2 PE=1 SV=2	sp|P00507|AATM_RAT	qWLQEVk	-0.1966	-0.2001	0	0	6	0
Aspartate aminotransferase, mitochondrial OS=Rattus norvegicus GN=Got2 PE=1 SV=2	sp|P00507|AATM_RAT	tcGFDFSGALEDISk	0.2952	0.1558	0	11	103	29
Aspartate aminotransferase, mitochondrial OS=Rattus norvegicus GN=Got2 PE=1 SV=2	sp|P00507|AATM_RAT	tQLVSNLk	0.06108	0.08321	0	11	25	0
Aspartate aminotransferase, mitochondrial OS=Rattus norvegicus GN=Got2 PE=1 SV=2	sp|P00507|AATM_RAT	tQLVSNLkk	-0.395	0.01421	0	2	7	5
Aspartate aminotransferase, mitochondrial OS=Rattus norvegicus GN=Got2 PE=1 SV=2	sp|P00507|AATM_RAT	vGAFTVVck	0.02133	0.199	0	7	12	0
Aspartate aminotransferase, mitochondrial OS=Rattus norvegicus GN=Got2 PE=1 SV=2	sp|P00507|AATM_RAT	vGASFLQR	0.02853	0.1891	0	9	3	0
Plectin OS=Rattus norvegicus GN=Plec PE=1 SV=2	sp|P30427|PLEC_RAT	aALAHSEEIATSQAAATk	-0.1213	0.118	0	0	2	2
Plectin OS=Rattus norvegicus GN=Plec PE=1 SV=2	sp|P30427|PLEC_RAT	aEAELLQQQk	0.2245	-0.01978	0	0	1	0
Plectin OS=Rattus norvegicus GN=Plec PE=1 SV=2	sp|P30427|PLEC_RAT	aEEAEAQkR	-0.1237	0.9524	0	0	1	0
Plectin OS=Rattus norvegicus GN=Plec PE=1 SV=2	sp|P30427|PLEC_RAT	aEMEVLLASk	0.07063	0.02239	0	2	6	0
Plectin OS=Rattus norvegicus GN=Plec PE=1 SV=2	sp|P30427|PLEC_RAT	aFcGFEDPR	-0.08177	-0.02131	0	6	2	0
Plectin OS=Rattus norvegicus GN=Plec PE=1 SV=2	sp|P30427|PLEC_RAT	aGLVGPEMHEk	-0.05207	-0.07962	0	0	3	6
Plectin OS=Rattus norvegicus GN=Plec PE=1 SV=2	sp|P30427|PLEC_RAT	aGVGAPVTQVTLQSTQR	-0.4303	0.1378	0	1	1	0
Plectin OS=Rattus norvegicus GN=Plec PE=1 SV=2	sp|P30427|PLEC_RAT	aGVVGPELHEk	-0.01028	-0.05122	0	0	3	0
Plectin OS=Rattus norvegicus GN=Plec PE=1 SV=2	sp|P30427|PLEC_RAT	aIVQLkPR	0.2309	0.005228	0	0	1	0
Plectin OS=Rattus norvegicus GN=Plec PE=1 SV=2	sp|P30427|PLEC_RAT	akLEQLFQDEVAk	0.1986	-0.06046	0	0	0	4
Plectin OS=Rattus norvegicus GN=Plec PE=1 SV=2	sp|P30427|PLEC_RAT	akVEVPVGGFk	0.0316	-0.1342	0	0	0	2
Plectin OS=Rattus norvegicus GN=Plec PE=1 SV=2	sp|P30427|PLEC_RAT	aLQALDELk	-0.06484	0.04009	0	1	7	0
Plectin OS=Rattus norvegicus GN=Plec PE=1 SV=2	sp|P30427|PLEC_RAT	aPVPASELLASk	-0.03141	-0.002334	0	0	2	0
Plectin OS=Rattus norvegicus GN=Plec PE=1 SV=2	sp|P30427|PLEC_RAT	aQAEAQQPVFNTLR	0.1581	0.02069	0	0	6	0
Plectin OS=Rattus norvegicus GN=Plec PE=1 SV=2	sp|P30427|PLEC_RAT	aQAELEAR	-0.06552	0.1643	0	3	0	0
Plectin OS=Rattus norvegicus GN=Plec PE=1 SV=2	sp|P30427|PLEC_RAT	aQAEQAALk	0.04212	-0.01342	0	2	1	0
Plectin OS=Rattus norvegicus GN=Plec PE=1 SV=2	sp|P30427|PLEC_RAT	aQQVEAAER	0.01261	0.117	0	2	0	0
Plectin OS=Rattus norvegicus GN=Plec PE=1 SV=2	sp|P30427|PLEC_RAT	aQQVEAAERSR	-0.5084	0.7545	0	1	0	0
Plectin OS=Rattus norvegicus GN=Plec PE=1 SV=2	sp|P30427|PLEC_RAT	aTVSAPFGk	-0.2164	0.06974	0	0	2	0
Plectin OS=Rattus norvegicus GN=Plec PE=1 SV=2	sp|P30427|PLEC_RAT	cDNFTTSWR	0.1611	0.09879	0	1	0	0
Plectin OS=Rattus norvegicus GN=Plec PE=1 SV=2	sp|P30427|PLEC_RAT	cVEDPETGLR	-0.05525	0.06696	0	6	0	0
Plectin OS=Rattus norvegicus GN=Plec PE=1 SV=2	sp|P30427|PLEC_RAT	dDNSGQMLLPLSDAR	-0.0872	0.2303	0	2	1	0
Plectin OS=Rattus norvegicus GN=Plec PE=1 SV=2	sp|P30427|PLEC_RAT	dLSEVGSVR	0.1662	0.01428	0	3	0	0
Plectin OS=Rattus norvegicus GN=Plec PE=1 SV=2	sp|P30427|PLEC_RAT	dPYTEQPISLFQAMk	0.1645	0.3482	0	0	0	1
Plectin OS=Rattus norvegicus GN=Plec PE=1 SV=2	sp|P30427|PLEC_RAT	dPYTGEQISLFQAMk	0.03533	0.1344	0	0	2	0
Plectin OS=Rattus norvegicus GN=Plec PE=1 SV=2	sp|P30427|PLEC_RAT	dSQDAGGFGPEDR	0.5304	0.2193	0	1	0	0
Plectin OS=Rattus norvegicus GN=Plec PE=1 SV=2	sp|P30427|PLEC_RAT	dTHDQLSEPSEVR	0.2112	-0.04852	0	0	1	0
Plectin OS=Rattus norvegicus GN=Plec PE=1 SV=2	sp|P30427|PLEC_RAT	dVSAYSk	0.1058	-0.05371	0	1	0	0
Plectin OS=Rattus norvegicus GN=Plec PE=1 SV=2	sp|P30427|PLEC_RAT	dYELQLITYk	0.3244	0.3767	0	2	2	1
Plectin OS=Rattus norvegicus GN=Plec PE=1 SV=2	sp|P30427|PLEC_RAT	eAEEGVR	0.1652	0.2598	0	1	0	0
Plectin OS=Rattus norvegicus GN=Plec PE=1 SV=2	sp|P30427|PLEC_RAT	eAIAELER	-0.1508	-0.0487	0	3	0	0
Plectin OS=Rattus norvegicus GN=Plec PE=1 SV=2	sp|P30427|PLEC_RAT	eEELQQTLQQEQNMLER	0.1252	0.2668	0	0	8	0
Plectin OS=Rattus norvegicus GN=Plec PE=1 SV=2	sp|P30427|PLEC_RAT	eLAEEDAAR	0.5482	-0.256	0	1	0	0
Plectin OS=Rattus norvegicus GN=Plec PE=1 SV=2	sp|P30427|PLEC_RAT	eLAEQELEk	0.1681	0.2644	0	0	1	0
Plectin OS=Rattus norvegicus GN=Plec PE=1 SV=2	sp|P30427|PLEC_RAT	eLEQLGRQLRYYR	0.2398	-0.7569	0	0	1	0
Plectin OS=Rattus norvegicus GN=Plec PE=1 SV=2	sp|P30427|PLEC_RAT	ePVTYSQLQQR	0.2138	-0.1475	0	4	0	0
Plectin OS=Rattus norvegicus GN=Plec PE=1 SV=2	sp|P30427|PLEC_RAT	eQMAQQLVEETQGFQR	-0.03211	-0.1427	0	0	3	0
Plectin OS=Rattus norvegicus GN=Plec PE=1 SV=2	sp|P30427|PLEC_RAT	eSADPLSSWLQDAk	0.2432	0.1376	0	1	5	1
Plectin OS=Rattus norvegicus GN=Plec PE=1 SV=2	sp|P30427|PLEC_RAT	eVLEMESAWR	0.184	-0.02508	0	9	0	0
Plectin OS=Rattus norvegicus GN=Plec PE=1 SV=2	sp|P30427|PLEC_RAT	fAEQTLR	-0.02691	0.05821	0	5	0	0
Plectin OS=Rattus norvegicus GN=Plec PE=1 SV=2	sp|P30427|PLEC_RAT	fISETLR	0.1576	-0.08155	0	1	0	0
Plectin OS=Rattus norvegicus GN=Plec PE=1 SV=2	sp|P30427|PLEC_RAT	fLEEEAEk	0.1441	0.1114	0	1	2	0
Plectin OS=Rattus norvegicus GN=Plec PE=1 SV=2	sp|P30427|PLEC_RAT	fPVTEAVNk	0.02662	0.2343	0	1	3	0
Plectin OS=Rattus norvegicus GN=Plec PE=1 SV=2	sp|P30427|PLEC_RAT	fRELAEEAAR	-1.234	-0.1972	0	0	1	0
Plectin OS=Rattus norvegicus GN=Plec PE=1 SV=2	sp|P30427|PLEC_RAT	gDQcQLVGPAQPFHWk	0.1115	0.264	0	0	3	3
Plectin OS=Rattus norvegicus GN=Plec PE=1 SV=2	sp|P30427|PLEC_RAT	gFFDPNTEENLTYLQLMER	0.4415	0.3331	0	0	2	0
Plectin OS=Rattus norvegicus GN=Plec PE=1 SV=2	sp|P30427|PLEC_RAT	gGELVYTDTEAR	0.1372	0.06665	0	5	0	0
Plectin OS=Rattus norvegicus GN=Plec PE=1 SV=2	sp|P30427|PLEC_RAT	gHVPLLAVcDYk	-0.1331	0.3616	0	0	1	1
Plectin OS=Rattus norvegicus GN=Plec PE=1 SV=2	sp|P30427|PLEC_RAT	gLLSAEVAR	-0.05444	0.04849	0	4	0	0
Plectin OS=Rattus norvegicus GN=Plec PE=1 SV=2	sp|P30427|PLEC_RAT	gLVGPELHDR	-0.06875	0.01668	0	0	13	0
Plectin OS=Rattus norvegicus GN=Plec PE=1 SV=2	sp|P30427|PLEC_RAT	gQLcFEGLR	-0.158	0.08524	0	2	0	0
Plectin OS=Rattus norvegicus GN=Plec PE=1 SV=2	sp|P30427|PLEC_RAT	gTSVIAGVWLEEAGQk	0.3438	-0.4545	0	0	1	0
Plectin OS=Rattus norvegicus GN=Plec PE=1 SV=2	sp|P30427|PLEC_RAT	gWLYYEAGQR	0.3591	-0.2856	0	1	0	0
Plectin OS=Rattus norvegicus GN=Plec PE=1 SV=2	sp|P30427|PLEC_RAT	gYFDEEMNR	0.1426	0.1411	0	4	0	0
Plectin OS=Rattus norvegicus GN=Plec PE=1 SV=2	sp|P30427|PLEC_RAT	iDGAEWGVDLPSVEAQLGSHR	0.3896	0.4006	0	1	1	3
Plectin OS=Rattus norvegicus GN=Plec PE=1 SV=2	sp|P30427|PLEC_RAT	iVITVVEEHER	0.1163	0.1166	0	0	5	0
Plectin OS=Rattus norvegicus GN=Plec PE=1 SV=2	sp|P30427|PLEC_RAT	kQITVEELVR	0.3376	-0.06573	0	0	1	0
Plectin OS=Rattus norvegicus GN=Plec PE=1 SV=2	sp|P30427|PLEC_RAT	lAEDEAFQR	-0.1193	-0.03421	0	4	0	0
Plectin OS=Rattus norvegicus GN=Plec PE=1 SV=2	sp|P30427|PLEC_RAT	lAEVEAALEk	0.09906	0.01702	0	4	27	0
Plectin OS=Rattus norvegicus GN=Plec PE=1 SV=2	sp|P30427|PLEC_RAT	lDLQYAk	-0.06857	-0.1013	0	1	2	0
Plectin OS=Rattus norvegicus GN=Plec PE=1 SV=2	sp|P30427|PLEC_RAT	lEEQAAQHk	-0.2746	-0.01922	0	0	1	0
Plectin OS=Rattus norvegicus GN=Plec PE=1 SV=2	sp|P30427|PLEC_RAT	lEQLFQDEVAk	0.01024	0.08686	0	0	13	0
Plectin OS=Rattus norvegicus GN=Plec PE=1 SV=2	sp|P30427|PLEC_RAT	lkAEAELLQQQk	0.197	0.04844	0	0	0	6
Plectin OS=Rattus norvegicus GN=Plec PE=1 SV=2	sp|P30427|PLEC_RAT	lkTEAEIALk	-0.05373	0.1574	0	0	0	2
Plectin OS=Rattus norvegicus GN=Plec PE=1 SV=2	sp|P30427|PLEC_RAT	lLDAQLSTGGIVDPSk	-0.2048	-0.03022	0	1	3	2
Plectin OS=Rattus norvegicus GN=Plec PE=1 SV=2	sp|P30427|PLEC_RAT	lLDPEDVDVPQPDEk	-0.1702	-0.09623	0	0	5	1
Plectin OS=Rattus norvegicus GN=Plec PE=1 SV=2	sp|P30427|PLEC_RAT	lLEAQAcTGGIIDPSTGER	0.2855	0.1696	0	3	4	0
Plectin OS=Rattus norvegicus GN=Plec PE=1 SV=2	sp|P30427|PLEC_RAT	lLEAQIATGGIIDPEESHR	0.1171	0.07022	0	0	5	2
Plectin OS=Rattus norvegicus GN=Plec PE=1 SV=2	sp|P30427|PLEC_RAT	lLPLTDk	-0.2247	0.03597	0	2	2	0
Plectin OS=Rattus norvegicus GN=Plec PE=1 SV=2	sp|P30427|PLEC_RAT	lMADFQAGR	0.5215	-0.1072	0	0	1	0
Plectin OS=Rattus norvegicus GN=Plec PE=1 SV=2	sp|P30427|PLEC_RAT	lPVDVAYQR	-0.208	0.05549	0	8	0	0
Plectin OS=Rattus norvegicus GN=Plec PE=1 SV=2	sp|P30427|PLEC_RAT	lPVEVAYk	0.06854	-0.03932	0	1	4	0
Plectin OS=Rattus norvegicus GN=Plec PE=1 SV=2	sp|P30427|PLEC_RAT	lQAEEAER	0.07534	0.1407	0	2	0	0
Plectin OS=Rattus norvegicus GN=Plec PE=1 SV=2	sp|P30427|PLEC_RAT	lQHEATAATQk	0.02025	-0.1152	0	0	0	1
Plectin OS=Rattus norvegicus GN=Plec PE=1 SV=2	sp|P30427|PLEC_RAT	lSVAAQEAAR	-0.03581	0.179	0	8	0	0
Plectin OS=Rattus norvegicus GN=Plec PE=1 SV=2	sp|P30427|PLEC_RAT	lSVYQAMk	0.7045	-0.05208	0	0	2	0
Plectin OS=Rattus norvegicus GN=Plec PE=1 SV=2	sp|P30427|PLEC_RAT	lTAEDLYEAR	0.08103	-0.0004532	0	3	0	0
Plectin OS=Rattus norvegicus GN=Plec PE=1 SV=2	sp|P30427|PLEC_RAT	lTVDEAVR	-0.1734	-0.2272	0	1	0	0
Plectin OS=Rattus norvegicus GN=Plec PE=1 SV=2	sp|P30427|PLEC_RAT	lTVEEAVR	-0.1178	-0.01371	0	7	0	0
Plectin OS=Rattus norvegicus GN=Plec PE=1 SV=2	sp|P30427|PLEC_RAT	lTVNEAVk	-0.09251	-0.09886	0	2	9	0
Plectin OS=Rattus norvegicus GN=Plec PE=1 SV=2	sp|P30427|PLEC_RAT	lYVHEAVk	-0.09999	0.02836	0	0	2	0
Plectin OS=Rattus norvegicus GN=Plec PE=1 SV=2	sp|P30427|PLEC_RAT	mGIVGPEFk	0.1351	-0.00146	0	1	1	0
Plectin OS=Rattus norvegicus GN=Plec PE=1 SV=2	sp|P30427|PLEC_RAT	mQAVQEATR	-0.2455	0.1023	0	5	0	0
Plectin OS=Rattus norvegicus GN=Plec PE=1 SV=2	sp|P30427|PLEC_RAT	mSAAQALk	0.04144	0.1983	0	3	0	0
Plectin OS=Rattus norvegicus GN=Plec PE=1 SV=2	sp|P30427|PLEC_RAT	mVEGYQGLR	0.06511	0.4537	0	3	0	0
Plectin OS=Rattus norvegicus GN=Plec PE=1 SV=2	sp|P30427|PLEC_RAT	nDESQLSPATR	-0.04964	0.1058	0	2	0	0
Plectin OS=Rattus norvegicus GN=Plec PE=1 SV=2	sp|P30427|PLEC_RAT	nLVDNITGQR	-0.05595	0.02136	0	8	0	0
Plectin OS=Rattus norvegicus GN=Plec PE=1 SV=2	sp|P30427|PLEC_RAT	qEEVYSELQAR	-0.09256	-0.1784	0	3	0	0
Plectin OS=Rattus norvegicus GN=Plec PE=1 SV=2	sp|P30427|PLEC_RAT	qELEAELAk	0.286	-0.02869	0	1	0	0
Plectin OS=Rattus norvegicus GN=Plec PE=1 SV=2	sp|P30427|PLEC_RAT	qELVASMEEAR	-0.6671	0.4315	0	1	0	0
Plectin OS=Rattus norvegicus GN=Plec PE=1 SV=2	sp|P30427|PLEC_RAT	qEQIQAVPIANSQAAR	0.1099	0.03029	0	1	2	0
Plectin OS=Rattus norvegicus GN=Plec PE=1 SV=2	sp|P30427|PLEC_RAT	qITVEELVR	-0.05165	-0.1369	0	5	0	0
Plectin OS=Rattus norvegicus GN=Plec PE=1 SV=2	sp|P30427|PLEC_RAT	qkVPAQQLQEAGILSMEELQR	0.1214	-0.2093	0	0	0	2
Plectin OS=Rattus norvegicus GN=Plec PE=1 SV=2	sp|P30427|PLEC_RAT	qLAAEEEQR	0.09643	0.2526	0	1	0	0
Plectin OS=Rattus norvegicus GN=Plec PE=1 SV=2	sp|P30427|PLEC_RAT	qLAEEDLAQQR	-0.01697	0.1847	0	2	2	0
Plectin OS=Rattus norvegicus GN=Plec PE=1 SV=2	sp|P30427|PLEC_RAT	qLEMSAEAER	0.131	0.1058	0	4	0	0
Plectin OS=Rattus norvegicus GN=Plec PE=1 SV=2	sp|P30427|PLEC_RAT	qLLEEELAR	-0.1022	0.2226	0	3	0	0
Plectin OS=Rattus norvegicus GN=Plec PE=1 SV=2	sp|P30427|PLEC_RAT	qLQLAQEAAQk	-0.06229	-0.02764	0	3	3	0
Plectin OS=Rattus norvegicus GN=Plec PE=1 SV=2	sp|P30427|PLEC_RAT	qSAEEQAQAQAQAQAAAEk	-0.1722	0.2153	0	0	0	2
Plectin OS=Rattus norvegicus GN=Plec PE=1 SV=2	sp|P30427|PLEC_RAT	qSSEAEIQAk	0.1806	0.5257	0	0	2	0
Plectin OS=Rattus norvegicus GN=Plec PE=1 SV=2	sp|P30427|PLEC_RAT	qTNLENLDQAFSVAER	0.2249	-0.003783	0	2	3	0
Plectin OS=Rattus norvegicus GN=Plec PE=1 SV=2	sp|P30427|PLEC_RAT	qVQVALETAQR	0.01434	0.05106	0	3	0	0
Plectin OS=Rattus norvegicus GN=Plec PE=1 SV=2	sp|P30427|PLEC_RAT	qYINAIk	-0.1596	0.2315	0	2	0	0
Plectin OS=Rattus norvegicus GN=Plec PE=1 SV=2	sp|P30427|PLEC_RAT	rAQAEQAALk	-0.1496	0.1181	0	0	1	1
Plectin OS=Rattus norvegicus GN=Plec PE=1 SV=2	sp|P30427|PLEC_RAT	rDDNSGQMLLPLSDAR	0.1505	0.2908	0	0	2	0
Plectin OS=Rattus norvegicus GN=Plec PE=1 SV=2	sp|P30427|PLEC_RAT	rEEAAVDAQQQk	0.03255	0.137	0	0	0	1
Plectin OS=Rattus norvegicus GN=Plec PE=1 SV=2	sp|P30427|PLEC_RAT	rLEEQAAQHk	0.1631	0.2587	0	0	0	1
Plectin OS=Rattus norvegicus GN=Plec PE=1 SV=2	sp|P30427|PLEC_RAT	rPELEDSTLR	0.3324	0.1261	0	0	1	0
Plectin OS=Rattus norvegicus GN=Plec PE=1 SV=2	sp|P30427|PLEC_RAT	rQVEEEIMALk	-0.135	-0.257	0	0	0	2
Plectin OS=Rattus norvegicus GN=Plec PE=1 SV=2	sp|P30427|PLEC_RAT	sAEVELQSk	0.3493	0.1358	0	2	0	0
Plectin OS=Rattus norvegicus GN=Plec PE=1 SV=2	sp|P30427|PLEC_RAT	sELELTLGk	0.04862	0.1182	0	0	3	0
Plectin OS=Rattus norvegicus GN=Plec PE=1 SV=2	sp|P30427|PLEC_RAT	sILDEELQR	-0.2873	0.201	0	2	0	0
Plectin OS=Rattus norvegicus GN=Plec PE=1 SV=2	sp|P30427|PLEC_RAT	sIQEELQHLR	0.1884	0.1228	0	0	8	0
Plectin OS=Rattus norvegicus GN=Plec PE=1 SV=2	sp|P30427|PLEC_RAT	sLAAEEEAAR	0.282	0.4537	0	3	0	0
Plectin OS=Rattus norvegicus GN=Plec PE=1 SV=2	sp|P30427|PLEC_RAT	sLSAIYLEk	-0.01081	0.05822	0	1	0	0
Plectin OS=Rattus norvegicus GN=Plec PE=1 SV=2	sp|P30427|PLEC_RAT	sYVDPSTDER	-0.2788	-0.2502	0	2	0	0
Plectin OS=Rattus norvegicus GN=Plec PE=1 SV=2	sp|P30427|PLEC_RAT	tELATQEk	-0.1097	0.2087	0	4	0	0
Plectin OS=Rattus norvegicus GN=Plec PE=1 SV=2	sp|P30427|PLEC_RAT	tEVVETTQVYTEEETRR	0.1045	0.08873	0	0	2	0
Plectin OS=Rattus norvegicus GN=Plec PE=1 SV=2	sp|P30427|PLEC_RAT	tLQEEHVTVTQLR	0.05595	0.04102	0	0	1	0
Plectin OS=Rattus norvegicus GN=Plec PE=1 SV=2	sp|P30427|PLEC_RAT	tQLASWSDPTEETGPVAGILDTETLEk	0.4489	-0.183	0	1	0	9
Plectin OS=Rattus norvegicus GN=Plec PE=1 SV=2	sp|P30427|PLEC_RAT	vALEEVER	-0.02107	-0.08089	0	5	0	0
Plectin OS=Rattus norvegicus GN=Plec PE=1 SV=2	sp|P30427|PLEC_RAT	vLADPSDDTk	0.1204	0.02619	0	3	0	0
Plectin OS=Rattus norvegicus GN=Plec PE=1 SV=2	sp|P30427|PLEC_RAT	vPAQQLQEAGILSMEELQR	0.06236	-0.03302	0	0	14	2
Plectin OS=Rattus norvegicus GN=Plec PE=1 SV=2	sp|P30427|PLEC_RAT	vPLDVAYAR	-0.06824	-0.0011	0	8	0	0
Plectin OS=Rattus norvegicus GN=Plec PE=1 SV=2	sp|P30427|PLEC_RAT	vPVDVAYQR	-0.1154	0.1309	0	3	0	0
Plectin OS=Rattus norvegicus GN=Plec PE=1 SV=2	sp|P30427|PLEC_RAT	vQSGSESVIQEYVDLR	0.3543	0.1257	0	0	5	0
Plectin OS=Rattus norvegicus GN=Plec PE=1 SV=2	sp|P30427|PLEC_RAT	vTIYEAMR	0.08115	0.1501	0	6	0	0
Plectin OS=Rattus norvegicus GN=Plec PE=1 SV=2	sp|P30427|PLEC_RAT	vYLDPSTR	0.1774	-0.1487	0	3	0	0
Cytosolic 10-formyltetrahydrofolate dehydrogenase OS=Rattus norvegicus GN=Aldh1l1 PE=1 SV=3	sp|P28037|AL1L1_RAT	aDPLGLEAEk	0.05962	0.1554	0	1	3	0
Cytosolic 10-formyltetrahydrofolate dehydrogenase OS=Rattus norvegicus GN=Aldh1l1 PE=1 SV=3	sp|P28037|AL1L1_RAT	aDPLGLEAEkDGVPVFk	-0.1714	0.505	0	0	2	11
Cytosolic 10-formyltetrahydrofolate dehydrogenase OS=Rattus norvegicus GN=Aldh1l1 PE=1 SV=3	sp|P28037|AL1L1_RAT	aGLILFGNDDR	-0.3239	0.2443	0	9	0	0
Cytosolic 10-formyltetrahydrofolate dehydrogenase OS=Rattus norvegicus GN=Aldh1l1 PE=1 SV=3	sp|P28037|AL1L1_RAT	aLYVSDk	0.002639	0.2959	0	11	2	0
Cytosolic 10-formyltetrahydrofolate dehydrogenase OS=Rattus norvegicus GN=Aldh1l1 PE=1 SV=3	sp|P28037|AL1L1_RAT	aNATEFGLASGVFTR	-0.07846	0.09033	0	1	0	0
Cytosolic 10-formyltetrahydrofolate dehydrogenase OS=Rattus norvegicus GN=Aldh1l1 PE=1 SV=3	sp|P28037|AL1L1_RAT	aVQMGMSSVFFNk	-0.1773	-0.2309	0	0	1	0
Cytosolic 10-formyltetrahydrofolate dehydrogenase OS=Rattus norvegicus GN=Aldh1l1 PE=1 SV=3	sp|P28037|AL1L1_RAT	cPQSEEGATYEGIQk	0.03551	0.04576	0	0	5	1
Cytosolic 10-formyltetrahydrofolate dehydrogenase OS=Rattus norvegicus GN=Aldh1l1 PE=1 SV=3	sp|P28037|AL1L1_RAT	cPQSEEGATyEGIQk	0.05454	0.3538	0	0	0	3
Cytosolic 10-formyltetrahydrofolate dehydrogenase OS=Rattus norvegicus GN=Aldh1l1 PE=1 SV=3	sp|P28037|AL1L1_RAT	dGVPVFk	0.1178	0.1928	0	3	1	0
Cytosolic 10-formyltetrahydrofolate dehydrogenase OS=Rattus norvegicus GN=Aldh1l1 PE=1 SV=3	sp|P28037|AL1L1_RAT	dLGEAALNEYLR	0.1543	0.1794	0	11	2	0
Cytosolic 10-formyltetrahydrofolate dehydrogenase OS=Rattus norvegicus GN=Aldh1l1 PE=1 SV=3	sp|P28037|AL1L1_RAT	dTNHGPQNHEAHLR	-0.1291	0.4295	0	0	0	1
Cytosolic 10-formyltetrahydrofolate dehydrogenase OS=Rattus norvegicus GN=Aldh1l1 PE=1 SV=3	sp|P28037|AL1L1_RAT	eAFENGLWGk	0.08328	0.1699	0	0	16	1
Cytosolic 10-formyltetrahydrofolate dehydrogenase OS=Rattus norvegicus GN=Aldh1l1 PE=1 SV=3	sp|P28037|AL1L1_RAT	ecEVLPDDTVSTLYNR	0.07869	0.08516	0	4	2	0
Cytosolic 10-formyltetrahydrofolate dehydrogenase OS=Rattus norvegicus GN=Aldh1l1 PE=1 SV=3	sp|P28037|AL1L1_RAT	ecEVLPDDTVSTLyNR	0.05806	0.3552	0	1	7	3
Cytosolic 10-formyltetrahydrofolate dehydrogenase OS=Rattus norvegicus GN=Aldh1l1 PE=1 SV=3	sp|P28037|AL1L1_RAT	eESFGPIMIISR	-0.06223	0.2702	0	5	2	0
Cytosolic 10-formyltetrahydrofolate dehydrogenase OS=Rattus norvegicus GN=Aldh1l1 PE=1 SV=3	sp|P28037|AL1L1_RAT	eGHEVVGVFTIPDk	0.1053	0.02138	0	0	2	1
Cytosolic 10-formyltetrahydrofolate dehydrogenase OS=Rattus norvegicus GN=Aldh1l1 PE=1 SV=3	sp|P28037|AL1L1_RAT	eGHEVVGVFTIPDkDGk	0.05042	0.2185	0	0	0	4
Cytosolic 10-formyltetrahydrofolate dehydrogenase OS=Rattus norvegicus GN=Aldh1l1 PE=1 SV=3	sp|P28037|AL1L1_RAT	eLcDGLELENEDVYMATTFR	0.3414	0.06946	0	1	61	11
Cytosolic 10-formyltetrahydrofolate dehydrogenase OS=Rattus norvegicus GN=Aldh1l1 PE=1 SV=3	sp|P28037|AL1L1_RAT	eLcDGLELENEDVyMATTFR	0.3857	-0.05995	0	0	1	0
Cytosolic 10-formyltetrahydrofolate dehydrogenase OS=Rattus norvegicus GN=Aldh1l1 PE=1 SV=3	sp|P28037|AL1L1_RAT	fADGDVDAVLSR	-0.0152	0.1375	0	27	3	0
Cytosolic 10-formyltetrahydrofolate dehydrogenase OS=Rattus norvegicus GN=Aldh1l1 PE=1 SV=3	sp|P28037|AL1L1_RAT	fAELTLk	-0.1731	0.2385	0	12	9	0
Cytosolic 10-formyltetrahydrofolate dehydrogenase OS=Rattus norvegicus GN=Aldh1l1 PE=1 SV=3	sp|P28037|AL1L1_RAT	fLFPEGIk	-0.1003	0.1813	0	0	2	0
Cytosolic 10-formyltetrahydrofolate dehydrogenase OS=Rattus norvegicus GN=Aldh1l1 PE=1 SV=3	sp|P28037|AL1L1_RAT	gASAINWTLIHGDk	0.1853	0.1773	0	0	1	0
Cytosolic 10-formyltetrahydrofolate dehydrogenase OS=Rattus norvegicus GN=Aldh1l1 PE=1 SV=3	sp|P28037|AL1L1_RAT	gASAINWTLIHGDkk	-0.2813	0.4467	0	0	0	2
Cytosolic 10-formyltetrahydrofolate dehydrogenase OS=Rattus norvegicus GN=Aldh1l1 PE=1 SV=3	sp|P28037|AL1L1_RAT	gEDDESEcVINYVEk	0.441	0.1738	0	0	5	0
Cytosolic 10-formyltetrahydrofolate dehydrogenase OS=Rattus norvegicus GN=Aldh1l1 PE=1 SV=3	sp|P28037|AL1L1_RAT	gEDDESEcVINyVEk	0.1996	0.2702	0	1	1	5
Cytosolic 10-formyltetrahydrofolate dehydrogenase OS=Rattus norvegicus GN=Aldh1l1 PE=1 SV=3	sp|P28037|AL1L1_RAT	gENcIAAGR	-0.2154	0.001645	0	3	3	0
Cytosolic 10-formyltetrahydrofolate dehydrogenase OS=Rattus norvegicus GN=Aldh1l1 PE=1 SV=3	sp|P28037|AL1L1_RAT	gFIQLLVR	-0.2358	0.1948	0	6	0	0
Cytosolic 10-formyltetrahydrofolate dehydrogenase OS=Rattus norvegicus GN=Aldh1l1 PE=1 SV=3	sp|P28037|AL1L1_RAT	gMVQAVR	0.01055	0.1918	0	2	0	0
Cytosolic 10-formyltetrahydrofolate dehydrogenase OS=Rattus norvegicus GN=Aldh1l1 PE=1 SV=3	sp|P28037|AL1L1_RAT	gNDkVPGAWTEAcGQk	-0.04521	0.2701	0	2	2	10
Cytosolic 10-formyltetrahydrofolate dehydrogenase OS=Rattus norvegicus GN=Aldh1l1 PE=1 SV=3	sp|P28037|AL1L1_RAT	gQALPEVVAk	-0.1493	0.2788	0	3	14	4
Cytosolic 10-formyltetrahydrofolate dehydrogenase OS=Rattus norvegicus GN=Aldh1l1 PE=1 SV=3	sp|P28037|AL1L1_RAT	gSASSDLELTEAELATAEAVR	0.2625	0.2365	0	4	14	0
Cytosolic 10-formyltetrahydrofolate dehydrogenase OS=Rattus norvegicus GN=Aldh1l1 PE=1 SV=3	sp|P28037|AL1L1_RAT	gVVNILPGSGSLVGQR	-0.01573	0.06658	0	4	1	0
Cytosolic 10-formyltetrahydrofolate dehydrogenase OS=Rattus norvegicus GN=Aldh1l1 PE=1 SV=3	sp|P28037|AL1L1_RAT	iAVIGQSLFGQEVYcQLR	-0.1337	0.1071	0	1	1	0
Cytosolic 10-formyltetrahydrofolate dehydrogenase OS=Rattus norvegicus GN=Aldh1l1 PE=1 SV=3	sp|P28037|AL1L1_RAT	iGFTGSTEVGk	-0.07228	0.1476	0	1	9	1
Cytosolic 10-formyltetrahydrofolate dehydrogenase OS=Rattus norvegicus GN=Aldh1l1 PE=1 SV=3	sp|P28037|AL1L1_RAT	iGNPLER	-0.2688	0.1837	0	10	1	0
Cytosolic 10-formyltetrahydrofolate dehydrogenase OS=Rattus norvegicus GN=Aldh1l1 PE=1 SV=3	sp|P28037|AL1L1_RAT	iLPNVPEVEDSTDFFk	0.04982	0.2986	0	0	23	23
Cytosolic 10-formyltetrahydrofolate dehydrogenase OS=Rattus norvegicus GN=Aldh1l1 PE=1 SV=3	sp|P28037|AL1L1_RAT	iNWDQPAEAIHNWIR	-0.1888	0.1394	0	0	6	0
Cytosolic 10-formyltetrahydrofolate dehydrogenase OS=Rattus norvegicus GN=Aldh1l1 PE=1 SV=3	sp|P28037|AL1L1_RAT	iQGATIPINQARPNR	-0.3687	0.3994	0	1	2	0
Cytosolic 10-formyltetrahydrofolate dehydrogenase OS=Rattus norvegicus GN=Aldh1l1 PE=1 SV=3	sp|P28037|AL1L1_RAT	kEGHEVVGVFTIPDkDGk	0.121	0.3037	0	0	0	0
Cytosolic 10-formyltetrahydrofolate dehydrogenase OS=Rattus norvegicus GN=Aldh1l1 PE=1 SV=3	sp|P28037|AL1L1_RAT	kIGFTGSTEVGk	0.2766	0.4933	0	0	0	1
Cytosolic 10-formyltetrahydrofolate dehydrogenase OS=Rattus norvegicus GN=Aldh1l1 PE=1 SV=3	sp|P28037|AL1L1_RAT	kLVEYcQR	-0.05413	0.1702	0	3	0	0
Cytosolic 10-formyltetrahydrofolate dehydrogenase OS=Rattus norvegicus GN=Aldh1l1 PE=1 SV=3	sp|P28037|AL1L1_RAT	kVSLELGGk	-0.04787	0.241	0	1	1	2
Cytosolic 10-formyltetrahydrofolate dehydrogenase OS=Rattus norvegicus GN=Aldh1l1 PE=1 SV=3	sp|P28037|AL1L1_RAT	lADVMEQHQEELATIEALDAGAVYTLALk	0.1339	-0.09257	0	0	0	0
Cytosolic 10-formyltetrahydrofolate dehydrogenase OS=Rattus norvegicus GN=Aldh1l1 PE=1 SV=3	sp|P28037|AL1L1_RAT	lFVEESIHNQFVQk	-0.07857	0.2177	0	1	4	22
Cytosolic 10-formyltetrahydrofolate dehydrogenase OS=Rattus norvegicus GN=Aldh1l1 PE=1 SV=3	sp|P28037|AL1L1_RAT	lIAEGTAPR	-0.07613	0.07557	0	3	2	0
Cytosolic 10-formyltetrahydrofolate dehydrogenase OS=Rattus norvegicus GN=Aldh1l1 PE=1 SV=3	sp|P28037|AL1L1_RAT	lQAGTVFINTYNk	0.03342	0.1845	0	1	1	0
Cytosolic 10-formyltetrahydrofolate dehydrogenase OS=Rattus norvegicus GN=Aldh1l1 PE=1 SV=3	sp|P28037|AL1L1_RAT	lRGEDDESEcVINYVEk	0.0411	-0.04796	0	0	1	3
Cytosolic 10-formyltetrahydrofolate dehydrogenase OS=Rattus norvegicus GN=Aldh1l1 PE=1 SV=3	sp|P28037|AL1L1_RAT	lVEYcQR	-0.02189	0.176	0	5	0	0
Cytosolic 10-formyltetrahydrofolate dehydrogenase OS=Rattus norvegicus GN=Aldh1l1 PE=1 SV=3	sp|P28037|AL1L1_RAT	mMPASQFFk	-0.04343	0.09831	0	1	0	0
Cytosolic 10-formyltetrahydrofolate dehydrogenase OS=Rattus norvegicus GN=Aldh1l1 PE=1 SV=3	sp|P28037|AL1L1_RAT	nIQLEDGk	-0.02874	0.2754	0	4	1	0
Cytosolic 10-formyltetrahydrofolate dehydrogenase OS=Rattus norvegicus GN=Aldh1l1 PE=1 SV=3	sp|P28037|AL1L1_RAT	scALSNVk	0.02634	0.1903	0	5	5	0
Cytosolic 10-formyltetrahydrofolate dehydrogenase OS=Rattus norvegicus GN=Aldh1l1 PE=1 SV=3	sp|P28037|AL1L1_RAT	sPLIIFADcDLNk	-0.09957	0.2618	0	2	9	0
Cytosolic 10-formyltetrahydrofolate dehydrogenase OS=Rattus norvegicus GN=Aldh1l1 PE=1 SV=3	sp|P28037|AL1L1_RAT	tDVAAPFGGFk	-0.06526	0.3147	0	6	9	2
Cytosolic 10-formyltetrahydrofolate dehydrogenase OS=Rattus norvegicus GN=Aldh1l1 PE=1 SV=3	sp|P28037|AL1L1_RAT	tHVGMSIQTFR	0.2691	0.2121	0	1	2	0
Cytosolic 10-formyltetrahydrofolate dehydrogenase OS=Rattus norvegicus GN=Aldh1l1 PE=1 SV=3	sp|P28037|AL1L1_RAT	tYNTINPTDGSVIcQVSLAQVSDVDk	0.2622	0.2393	0	2	6	16
Cytosolic 10-formyltetrahydrofolate dehydrogenase OS=Rattus norvegicus GN=Aldh1l1 PE=1 SV=3	sp|P28037|AL1L1_RAT	tyNTINPTDGSVIcQVSLAQVSDVDk	0.194	0.2367	0	0	0	1
Cytosolic 10-formyltetrahydrofolate dehydrogenase OS=Rattus norvegicus GN=Aldh1l1 PE=1 SV=3	sp|P28037|AL1L1_RAT	vPGAWTEAcGQk	0.137	0.2465	0	1	8	0
Cytosolic 10-formyltetrahydrofolate dehydrogenase OS=Rattus norvegicus GN=Aldh1l1 PE=1 SV=3	sp|P28037|AL1L1_RAT	vSLELGGk	-0.03108	0.1491	0	3	0	0
Cytosolic 10-formyltetrahydrofolate dehydrogenase OS=Rattus norvegicus GN=Aldh1l1 PE=1 SV=3	sp|P28037|AL1L1_RAT	vVEEVEk	0.2056	0.4524	0	2	4	0
Cytosolic 10-formyltetrahydrofolate dehydrogenase OS=Rattus norvegicus GN=Aldh1l1 PE=1 SV=3	sp|P28037|AL1L1_RAT	yFAGWcDk	0.1439	0.1831	0	0	12	0
Spectrin alpha chain, non-erythrocytic 1 OS=Rattus norvegicus GN=Sptan1 PE=1 SV=2	sp|P16086|SPTN1_RAT	aDVVESWIGEk	0.08321	-0.05342	0	2	20	1
Spectrin alpha chain, non-erythrocytic 1 OS=Rattus norvegicus GN=Sptan1 PE=1 SV=2	sp|P16086|SPTN1_RAT	aINVQEEk	-0.04211	-0.07025	0	3	0	0
Spectrin alpha chain, non-erythrocytic 1 OS=Rattus norvegicus GN=Sptan1 PE=1 SV=2	sp|P16086|SPTN1_RAT	aLcAEADR	-0.1866	-0.2783	0	3	0	0
Spectrin alpha chain, non-erythrocytic 1 OS=Rattus norvegicus GN=Sptan1 PE=1 SV=2	sp|P16086|SPTN1_RAT	aLINADELANDVAGAEALLDR	0.1218	-0.3439	0	0	5	1
Spectrin alpha chain, non-erythrocytic 1 OS=Rattus norvegicus GN=Sptan1 PE=1 SV=2	sp|P16086|SPTN1_RAT	aLSSEGkPYVTk	-0.2582	-0.1085	0	0	1	2
Spectrin alpha chain, non-erythrocytic 1 OS=Rattus norvegicus GN=Sptan1 PE=1 SV=2	sp|P16086|SPTN1_RAT	cNSLEEIk	-0.2799	0.0329	0	0	1	0
Spectrin alpha chain, non-erythrocytic 1 OS=Rattus norvegicus GN=Sptan1 PE=1 SV=2	sp|P16086|SPTN1_RAT	cTELNQAWTSLGk	-0.3043	-0.002303	0	1	4	1
Spectrin alpha chain, non-erythrocytic 1 OS=Rattus norvegicus GN=Sptan1 PE=1 SV=2	sp|P16086|SPTN1_RAT	dADETkEWIEEk	0.04053	0.01879	0	0	0	2
Spectrin alpha chain, non-erythrocytic 1 OS=Rattus norvegicus GN=Sptan1 PE=1 SV=2	sp|P16086|SPTN1_RAT	dcEQAENWMAAR	0.01604	-0.1684	0	4	2	0
Spectrin alpha chain, non-erythrocytic 1 OS=Rattus norvegicus GN=Sptan1 PE=1 SV=2	sp|P16086|SPTN1_RAT	dLAALEDk	-0.08908	-0.138	0	1	4	0
Spectrin alpha chain, non-erythrocytic 1 OS=Rattus norvegicus GN=Sptan1 PE=1 SV=2	sp|P16086|SPTN1_RAT	dLAALGDk	-0.1531	-0.1406	0	1	2	0
Spectrin alpha chain, non-erythrocytic 1 OS=Rattus norvegicus GN=Sptan1 PE=1 SV=2	sp|P16086|SPTN1_RAT	dLASVNNLLk	0.01766	-0.06276	0	4	10	0
Spectrin alpha chain, non-erythrocytic 1 OS=Rattus norvegicus GN=Sptan1 PE=1 SV=2	sp|P16086|SPTN1_RAT	dLNSQADSLMTSSAFDTSQVk	0.15	0.08163	0	0	1	0
Spectrin alpha chain, non-erythrocytic 1 OS=Rattus norvegicus GN=Sptan1 PE=1 SV=2	sp|P16086|SPTN1_RAT	dLTGVQNLR	-0.2081	-0.1361	0	6	0	0
Spectrin alpha chain, non-erythrocytic 1 OS=Rattus norvegicus GN=Sptan1 PE=1 SV=2	sp|P16086|SPTN1_RAT	dLTNVQNLQk	-0.4082	-0.259	0	4	6	0
Spectrin alpha chain, non-erythrocytic 1 OS=Rattus norvegicus GN=Sptan1 PE=1 SV=2	sp|P16086|SPTN1_RAT	dLTSWVTEMk	0.09438	-0.1109	0	1	4	0
Spectrin alpha chain, non-erythrocytic 1 OS=Rattus norvegicus GN=Sptan1 PE=1 SV=2	sp|P16086|SPTN1_RAT	dMDDEESWIk	0.2684	-0.07638	0	2	2	0
Spectrin alpha chain, non-erythrocytic 1 OS=Rattus norvegicus GN=Sptan1 PE=1 SV=2	sp|P16086|SPTN1_RAT	dQLLAAk	0.07914	0.2516	0	0	1	0
Spectrin alpha chain, non-erythrocytic 1 OS=Rattus norvegicus GN=Sptan1 PE=1 SV=2	sp|P16086|SPTN1_RAT	dVDETIGWIk	0.01954	-0.162	0	2	10	4
Spectrin alpha chain, non-erythrocytic 1 OS=Rattus norvegicus GN=Sptan1 PE=1 SV=2	sp|P16086|SPTN1_RAT	dVEDEETWIR	0.0491	-0.2952	0	7	1	0
Spectrin alpha chain, non-erythrocytic 1 OS=Rattus norvegicus GN=Sptan1 PE=1 SV=2	sp|P16086|SPTN1_RAT	dVTGAEALLER	0.09141	0.02317	0	2	0	0
Spectrin alpha chain, non-erythrocytic 1 OS=Rattus norvegicus GN=Sptan1 PE=1 SV=2	sp|P16086|SPTN1_RAT	eAALTSEEVGADLEQVEVLQk	0.0008682	-0.06014	0	0	6	5
Spectrin alpha chain, non-erythrocytic 1 OS=Rattus norvegicus GN=Sptan1 PE=1 SV=2	sp|P16086|SPTN1_RAT	eAFLNTEDkGDSLDSVEALIk	0.2571	-0.07152	0	0	4	11
Spectrin alpha chain, non-erythrocytic 1 OS=Rattus norvegicus GN=Sptan1 PE=1 SV=2	sp|P16086|SPTN1_RAT	eANELQQWINEk	0.051	-0.0773	0	1	17	3
Spectrin alpha chain, non-erythrocytic 1 OS=Rattus norvegicus GN=Sptan1 PE=1 SV=2	sp|P16086|SPTN1_RAT	ecEDVMDWINDk	0.4003	0.03624	0	1	1	0
Spectrin alpha chain, non-erythrocytic 1 OS=Rattus norvegicus GN=Sptan1 PE=1 SV=2	sp|P16086|SPTN1_RAT	eELITNWEQIR	-0.001599	0.0612	0	0	5	0
Spectrin alpha chain, non-erythrocytic 1 OS=Rattus norvegicus GN=Sptan1 PE=1 SV=2	sp|P16086|SPTN1_RAT	eELYQNLTR	-0.0108	-0.01242	0	13	0	0
Spectrin alpha chain, non-erythrocytic 1 OS=Rattus norvegicus GN=Sptan1 PE=1 SV=2	sp|P16086|SPTN1_RAT	ekEPIAASTNR	0.05662	-0.1539	0	0	1	0
Spectrin alpha chain, non-erythrocytic 1 OS=Rattus norvegicus GN=Sptan1 PE=1 SV=2	sp|P16086|SPTN1_RAT	ekEPIVGSTDYGkDEDSAEALLk	0.3889	-0.4746	0	0	0	0
Spectrin alpha chain, non-erythrocytic 1 OS=Rattus norvegicus GN=Sptan1 PE=1 SV=2	sp|P16086|SPTN1_RAT	ekEQLMASDDFGR	-0.1578	-0.1079	0	0	5	2
Spectrin alpha chain, non-erythrocytic 1 OS=Rattus norvegicus GN=Sptan1 PE=1 SV=2	sp|P16086|SPTN1_RAT	eLELQkEQR	1.017	0.2461	0	0	1	0
Spectrin alpha chain, non-erythrocytic 1 OS=Rattus norvegicus GN=Sptan1 PE=1 SV=2	sp|P16086|SPTN1_RAT	eLPTAFDYVEFTR	-0.1901	0.3032	0	6	15	0
Spectrin alpha chain, non-erythrocytic 1 OS=Rattus norvegicus GN=Sptan1 PE=1 SV=2	sp|P16086|SPTN1_RAT	eLVLALYDYQEk	0.04342	-0.3723	0	0	7	0
Spectrin alpha chain, non-erythrocytic 1 OS=Rattus norvegicus GN=Sptan1 PE=1 SV=2	sp|P16086|SPTN1_RAT	eNLLEEQGSIALR	-0.2044	-0.03697	0	5	7	0
Spectrin alpha chain, non-erythrocytic 1 OS=Rattus norvegicus GN=Sptan1 PE=1 SV=2	sp|P16086|SPTN1_RAT	eQLMASDDFGR	0.2114	0.04788	0	1	0	0
Spectrin alpha chain, non-erythrocytic 1 OS=Rattus norvegicus GN=Sptan1 PE=1 SV=2	sp|P16086|SPTN1_RAT	gAcAGSEDAVk	-0.03862	0.1396	0	0	3	0
Spectrin alpha chain, non-erythrocytic 1 OS=Rattus norvegicus GN=Sptan1 PE=1 SV=2	sp|P16086|SPTN1_RAT	gDSLDSVEALIk	-0.207	0.1239	0	1	2	0
Spectrin alpha chain, non-erythrocytic 1 OS=Rattus norvegicus GN=Sptan1 PE=1 SV=2	sp|P16086|SPTN1_RAT	gLVSSDELAk	-0.2313	0.09771	0	2	0	0
Spectrin alpha chain, non-erythrocytic 1 OS=Rattus norvegicus GN=Sptan1 PE=1 SV=2	sp|P16086|SPTN1_RAT	gNAMVEEGHFAAEDVk	-0.08029	-0.2597	0	0	3	3
Spectrin alpha chain, non-erythrocytic 1 OS=Rattus norvegicus GN=Sptan1 PE=1 SV=2	sp|P16086|SPTN1_RAT	gVIDMGNSLIER	0.1864	0.0385	0	3	2	0
Spectrin alpha chain, non-erythrocytic 1 OS=Rattus norvegicus GN=Sptan1 PE=1 SV=2	sp|P16086|SPTN1_RAT	hALLEADVAAHQDR	-0.316	-0.07142	0	1	1	2
Spectrin alpha chain, non-erythrocytic 1 OS=Rattus norvegicus GN=Sptan1 PE=1 SV=2	sp|P16086|SPTN1_RAT	hQAFEAELHANADR	-0.3846	0.1079	0	0	0	1
Spectrin alpha chain, non-erythrocytic 1 OS=Rattus norvegicus GN=Sptan1 PE=1 SV=2	sp|P16086|SPTN1_RAT	hQAFEAEVQANSGAIVk	0.1406	-0.131	0	0	1	3
Spectrin alpha chain, non-erythrocytic 1 OS=Rattus norvegicus GN=Sptan1 PE=1 SV=2	sp|P16086|SPTN1_RAT	hQALQAEIAGHEPR	-0.4276	-0.2295	0	0	2	2
Spectrin alpha chain, non-erythrocytic 1 OS=Rattus norvegicus GN=Sptan1 PE=1 SV=2	sp|P16086|SPTN1_RAT	iDGITIQAR	-0.2803	-0.2004	0	4	0	0
Spectrin alpha chain, non-erythrocytic 1 OS=Rattus norvegicus GN=Sptan1 PE=1 SV=2	sp|P16086|SPTN1_RAT	iTALDEFATk	-0.06733	-0.02906	0	1	12	0
Spectrin alpha chain, non-erythrocytic 1 OS=Rattus norvegicus GN=Sptan1 PE=1 SV=2	sp|P16086|SPTN1_RAT	kFEEFQTDLAAHEER	-0.001209	-0.08399	0	0	2	9
Spectrin alpha chain, non-erythrocytic 1 OS=Rattus norvegicus GN=Sptan1 PE=1 SV=2	sp|P16086|SPTN1_RAT	kHEAFETDFTVHk	-0.2095	0.2424	0	0	0	0
Spectrin alpha chain, non-erythrocytic 1 OS=Rattus norvegicus GN=Sptan1 PE=1 SV=2	sp|P16086|SPTN1_RAT	kIEDLGAAMEEALILDNk	0.2182	-0.04705	0	0	0	3
Spectrin alpha chain, non-erythrocytic 1 OS=Rattus norvegicus GN=Sptan1 PE=1 SV=2	sp|P16086|SPTN1_RAT	kLDPAQSASR	0.1793	-0.09719	0	0	1	0
Spectrin alpha chain, non-erythrocytic 1 OS=Rattus norvegicus GN=Sptan1 PE=1 SV=2	sp|P16086|SPTN1_RAT	kLLEATELk	-0.1729	-0.02676	0	0	1	1
Spectrin alpha chain, non-erythrocytic 1 OS=Rattus norvegicus GN=Sptan1 PE=1 SV=2	sp|P16086|SPTN1_RAT	lAALADQWQFLVQk	-0.2016	-0.006548	0	0	1	0
Spectrin alpha chain, non-erythrocytic 1 OS=Rattus norvegicus GN=Sptan1 PE=1 SV=2	sp|P16086|SPTN1_RAT	lDETGNLMISEGHFASETIR	-0.033	0.1125	0	0	4	0
Spectrin alpha chain, non-erythrocytic 1 OS=Rattus norvegicus GN=Sptan1 PE=1 SV=2	sp|P16086|SPTN1_RAT	lDILDQER	-0.07571	-0.3885	0	1	0	0
Spectrin alpha chain, non-erythrocytic 1 OS=Rattus norvegicus GN=Sptan1 PE=1 SV=2	sp|P16086|SPTN1_RAT	lEAELAAHEPAIQGVLDTGk	-0.02941	-0.1311	0	0	0	9
Spectrin alpha chain, non-erythrocytic 1 OS=Rattus norvegicus GN=Sptan1 PE=1 SV=2	sp|P16086|SPTN1_RAT	lEAELAAHEPAIQGVLDTGkk	0.03696	-0.008003	0	0	0	0
Spectrin alpha chain, non-erythrocytic 1 OS=Rattus norvegicus GN=Sptan1 PE=1 SV=2	sp|P16086|SPTN1_RAT	lFGAAEVQR	-0.2665	-0.09271	0	6	1	0
Spectrin alpha chain, non-erythrocytic 1 OS=Rattus norvegicus GN=Sptan1 PE=1 SV=2	sp|P16086|SPTN1_RAT	lGDSHDLQR	-0.2261	-0.1674	0	0	3	0
Spectrin alpha chain, non-erythrocytic 1 OS=Rattus norvegicus GN=Sptan1 PE=1 SV=2	sp|P16086|SPTN1_RAT	lGESQTLQQFSR	-0.1127	0.204	0	5	2	0
Spectrin alpha chain, non-erythrocytic 1 OS=Rattus norvegicus GN=Sptan1 PE=1 SV=2	sp|P16086|SPTN1_RAT	lIDVNHYAk	-0.2463	-0.1978	0	1	4	0
Spectrin alpha chain, non-erythrocytic 1 OS=Rattus norvegicus GN=Sptan1 PE=1 SV=2	sp|P16086|SPTN1_RAT	lIQEQHPEEELIk	-0.02905	-0.1994	0	0	2	2
Spectrin alpha chain, non-erythrocytic 1 OS=Rattus norvegicus GN=Sptan1 PE=1 SV=2	sp|P16086|SPTN1_RAT	lLEAQSHFR	-0.2058	-0.1925	0	0	3	0
Spectrin alpha chain, non-erythrocytic 1 OS=Rattus norvegicus GN=Sptan1 PE=1 SV=2	sp|P16086|SPTN1_RAT	lLEATELk	-0.1356	-0.1759	0	1	5	0
Spectrin alpha chain, non-erythrocytic 1 OS=Rattus norvegicus GN=Sptan1 PE=1 SV=2	sp|P16086|SPTN1_RAT	lLVSSEDYGR	-0.04467	-0.004784	0	6	0	0
Spectrin alpha chain, non-erythrocytic 1 OS=Rattus norvegicus GN=Sptan1 PE=1 SV=2	sp|P16086|SPTN1_RAT	lNHQEFk	-0.0973	-0.08232	0	0	1	1
Spectrin alpha chain, non-erythrocytic 1 OS=Rattus norvegicus GN=Sptan1 PE=1 SV=2	sp|P16086|SPTN1_RAT	lQQSHPLSANQIQVk	-0.1685	0.1662	0	0	1	0
Spectrin alpha chain, non-erythrocytic 1 OS=Rattus norvegicus GN=Sptan1 PE=1 SV=2	sp|P16086|SPTN1_RAT	lQVASDENYkDPTNLQGk	0.04072	-0.1711	0	0	0	5
Spectrin alpha chain, non-erythrocytic 1 OS=Rattus norvegicus GN=Sptan1 PE=1 SV=2	sp|P16086|SPTN1_RAT	lQVASDENykDPTNLQGk	-0.06806	0.1736	0	0	0	1
Spectrin alpha chain, non-erythrocytic 1 OS=Rattus norvegicus GN=Sptan1 PE=1 SV=2	sp|P16086|SPTN1_RAT	lSDDNTIGQEEIQQR	0.04147	-0.05567	0	3	4	0
Spectrin alpha chain, non-erythrocytic 1 OS=Rattus norvegicus GN=Sptan1 PE=1 SV=2	sp|P16086|SPTN1_RAT	lSELNQk	-0.1687	-0.1766	0	3	3	0
Spectrin alpha chain, non-erythrocytic 1 OS=Rattus norvegicus GN=Sptan1 PE=1 SV=2	sp|P16086|SPTN1_RAT	lSILSEER	-0.2416	-0.07263	0	4	0	0
Spectrin alpha chain, non-erythrocytic 1 OS=Rattus norvegicus GN=Sptan1 PE=1 SV=2	sp|P16086|SPTN1_RAT	mQHNLEQQIQAR	-0.2006	0.3411	0	1	0	0
Spectrin alpha chain, non-erythrocytic 1 OS=Rattus norvegicus GN=Sptan1 PE=1 SV=2	sp|P16086|SPTN1_RAT	nQALNTDNYGHDLASVQALQR	0.04134	-0.04851	0	0	7	4
Spectrin alpha chain, non-erythrocytic 1 OS=Rattus norvegicus GN=Sptan1 PE=1 SV=2	sp|P16086|SPTN1_RAT	nTTGVTEEALk	-0.004798	-0.1412	0	4	0	0
Spectrin alpha chain, non-erythrocytic 1 OS=Rattus norvegicus GN=Sptan1 PE=1 SV=2	sp|P16086|SPTN1_RAT	qDLEDSLQAQQYFADANEAESWMR	-6.644	0.085	0	1	1	0
Spectrin alpha chain, non-erythrocytic 1 OS=Rattus norvegicus GN=Sptan1 PE=1 SV=2	sp|P16086|SPTN1_RAT	qEEVNAAWQR	-0.3064	-0.1751	0	2	2	0
Spectrin alpha chain, non-erythrocytic 1 OS=Rattus norvegicus GN=Sptan1 PE=1 SV=2	sp|P16086|SPTN1_RAT	qFQDAGHFDAENIkk	-0.2308	-0.004056	0	0	1	1
Spectrin alpha chain, non-erythrocytic 1 OS=Rattus norvegicus GN=Sptan1 PE=1 SV=2	sp|P16086|SPTN1_RAT	qGFVPAAYVk	-0.1679	-0.1854	0	3	1	0
Spectrin alpha chain, non-erythrocytic 1 OS=Rattus norvegicus GN=Sptan1 PE=1 SV=2	sp|P16086|SPTN1_RAT	qGQIDNQTR	0.05626	-0.3894	0	0	1	0
Spectrin alpha chain, non-erythrocytic 1 OS=Rattus norvegicus GN=Sptan1 PE=1 SV=2	sp|P16086|SPTN1_RAT	qQNFNTGIk	0.04712	-0.001003	0	1	1	0
Spectrin alpha chain, non-erythrocytic 1 OS=Rattus norvegicus GN=Sptan1 PE=1 SV=2	sp|P16086|SPTN1_RAT	qQVAPMDDETGkELVLALYDYQEk	0.04687	-0.02787	0	0	0	3
Spectrin alpha chain, non-erythrocytic 1 OS=Rattus norvegicus GN=Sptan1 PE=1 SV=2	sp|P16086|SPTN1_RAT	qWELLLEk	-0.2474	-0.1322	0	0	7	0
Spectrin alpha chain, non-erythrocytic 1 OS=Rattus norvegicus GN=Sptan1 PE=1 SV=2	sp|P16086|SPTN1_RAT	rEELITNWEQIR	-0.3559	-0.1682	0	0	10	1
Spectrin alpha chain, non-erythrocytic 1 OS=Rattus norvegicus GN=Sptan1 PE=1 SV=2	sp|P16086|SPTN1_RAT	rLEAELAAHEPAIQGVLDTGk	0.1667	-0.5293	0	0	0	3
Spectrin alpha chain, non-erythrocytic 1 OS=Rattus norvegicus GN=Sptan1 PE=1 SV=2	sp|P16086|SPTN1_RAT	rLEAELAAHEPAIQGVLDTGkk	-0.3067	0.0965	0	0	0	0
Spectrin alpha chain, non-erythrocytic 1 OS=Rattus norvegicus GN=Sptan1 PE=1 SV=2	sp|P16086|SPTN1_RAT	rNEVLDR	-0.3532	-0.4756	0	1	0	0
Spectrin alpha chain, non-erythrocytic 1 OS=Rattus norvegicus GN=Sptan1 PE=1 SV=2	sp|P16086|SPTN1_RAT	rQDLEDSLQAQQYFADANEAESWMR	0.02979	0.3099	0	1	1	4
Spectrin alpha chain, non-erythrocytic 1 OS=Rattus norvegicus GN=Sptan1 PE=1 SV=2	sp|P16086|SPTN1_RAT	sLSAQEEk	-0.01739	0.04232	0	0	1	0
Spectrin alpha chain, non-erythrocytic 1 OS=Rattus norvegicus GN=Sptan1 PE=1 SV=2	sp|P16086|SPTN1_RAT	sSLSSAQADFNQLAELDR	0.142	-0.006597	0	3	8	0
Spectrin alpha chain, non-erythrocytic 1 OS=Rattus norvegicus GN=Sptan1 PE=1 SV=2	sp|P16086|SPTN1_RAT	tATDEAYkDPSNLQGk	0.1177	-0.1242	0	0	2	0
Spectrin alpha chain, non-erythrocytic 1 OS=Rattus norvegicus GN=Sptan1 PE=1 SV=2	sp|P16086|SPTN1_RAT	tkQEEVNAAWQR	-0.04412	-0.1036	0	0	7	1
Spectrin alpha chain, non-erythrocytic 1 OS=Rattus norvegicus GN=Sptan1 PE=1 SV=2	sp|P16086|SPTN1_RAT	tYLLDGScMVEESGTLESQLEATk	0.06709	-0.1393	0	2	4	8
Spectrin alpha chain, non-erythrocytic 1 OS=Rattus norvegicus GN=Sptan1 PE=1 SV=2	sp|P16086|SPTN1_RAT	vLETAEDIQER	-0.2895	0.02487	0	3	5	0
Spectrin alpha chain, non-erythrocytic 1 OS=Rattus norvegicus GN=Sptan1 PE=1 SV=2	sp|P16086|SPTN1_RAT	vNDVcTNGQDLIk	-0.02421	-0.2984	0	0	3	0
Spectrin alpha chain, non-erythrocytic 1 OS=Rattus norvegicus GN=Sptan1 PE=1 SV=2	sp|P16086|SPTN1_RAT	vNEVNQFAAk	-0.1512	-0.08912	0	8	10	0
Dimethylglycine dehydrogenase, mitochondrial OS=Rattus norvegicus GN=Dmgdh PE=1 SV=1	sp|Q63342|M2GD_RAT	aDIINIVNGPITYSPDILPMVGPHQGVR	0.2711	0.5664	0	1	0	0
Dimethylglycine dehydrogenase, mitochondrial OS=Rattus norvegicus GN=Dmgdh PE=1 SV=1	sp|Q63342|M2GD_RAT	aETVIIGGGcVGVSLAYHLAk	-0.0247	0.3082	0	0	0	3
Dimethylglycine dehydrogenase, mitochondrial OS=Rattus norvegicus GN=Dmgdh PE=1 SV=1	sp|Q63342|M2GD_RAT	aWGSEMNcDTNPLEAGLDYFIk	0.539	0.05458	0	1	3	10
Dimethylglycine dehydrogenase, mitochondrial OS=Rattus norvegicus GN=Dmgdh PE=1 SV=1	sp|Q63342|M2GD_RAT	dGLLFGPYESQEk	0.1043	0.102	0	11	25	16
Dimethylglycine dehydrogenase, mitochondrial OS=Rattus norvegicus GN=Dmgdh PE=1 SV=1	sp|Q63342|M2GD_RAT	dGLLFGPyESQEk	-0.07459	-0.1745	0	0	2	2
Dimethylglycine dehydrogenase, mitochondrial OS=Rattus norvegicus GN=Dmgdh PE=1 SV=1	sp|Q63342|M2GD_RAT	dLEGSYYLR	0.1568	-0.007999	0	26	5	0
Dimethylglycine dehydrogenase, mitochondrial OS=Rattus norvegicus GN=Dmgdh PE=1 SV=1	sp|Q63342|M2GD_RAT	dVVLLEk	-0.2292	0.08789	0	2	37	1
Dimethylglycine dehydrogenase, mitochondrial OS=Rattus norvegicus GN=Dmgdh PE=1 SV=1	sp|Q63342|M2GD_RAT	eDSAALYER	0.74	-0.9692	0	4	0	0
Dimethylglycine dehydrogenase, mitochondrial OS=Rattus norvegicus GN=Dmgdh PE=1 SV=1	sp|Q63342|M2GD_RAT	eGQESPPSPPEWk	-0.104	0.05992	0	4	9	4
Dimethylglycine dehydrogenase, mitochondrial OS=Rattus norvegicus GN=Dmgdh PE=1 SV=1	sp|Q63342|M2GD_RAT	eLFESDLDR	0.1873	-0.04802	0	9	0	0
Dimethylglycine dehydrogenase, mitochondrial OS=Rattus norvegicus GN=Dmgdh PE=1 SV=1	sp|Q63342|M2GD_RAT	eSYGFNNIVGYPk	0.1509	0.09053	0	9	35	6
Dimethylglycine dehydrogenase, mitochondrial OS=Rattus norvegicus GN=Dmgdh PE=1 SV=1	sp|Q63342|M2GD_RAT	eSyGFNNIVGYPk	-0.01006	0.03292	0	0	3	2
Dimethylglycine dehydrogenase, mitochondrial OS=Rattus norvegicus GN=Dmgdh PE=1 SV=1	sp|Q63342|M2GD_RAT	eSYGFNNIVGYPkEER	-0.2033	-0.1417	0	0	2	3
Dimethylglycine dehydrogenase, mitochondrial OS=Rattus norvegicus GN=Dmgdh PE=1 SV=1	sp|Q63342|M2GD_RAT	gGYDVEIR	0.01901	-0.02217	0	11	1	0
Dimethylglycine dehydrogenase, mitochondrial OS=Rattus norvegicus GN=Dmgdh PE=1 SV=1	sp|Q63342|M2GD_RAT	gGyDVEIR	0.2081	0.01155	0	0	1	2
Dimethylglycine dehydrogenase, mitochondrial OS=Rattus norvegicus GN=Dmgdh PE=1 SV=1	sp|Q63342|M2GD_RAT	gQDSTQLLDHLcANVIPk	-0.09403	0.1059	0	0	6	4
Dimethylglycine dehydrogenase, mitochondrial OS=Rattus norvegicus GN=Dmgdh PE=1 SV=1	sp|Q63342|M2GD_RAT	iHELFPLLNMDk	0.03995	0.2162	0	0	5	3
Dimethylglycine dehydrogenase, mitochondrial OS=Rattus norvegicus GN=Dmgdh PE=1 SV=1	sp|Q63342|M2GD_RAT	iLAGLYNPGDGHIDPYSLTMALATGAR	0.0823	0.2279	0	0	5	7
Dimethylglycine dehydrogenase, mitochondrial OS=Rattus norvegicus GN=Dmgdh PE=1 SV=1	sp|Q63342|M2GD_RAT	iMNAGQEEGIDNFGTYALNALR	0.1718	-0.1791	0	0	2	0
Dimethylglycine dehydrogenase, mitochondrial OS=Rattus norvegicus GN=Dmgdh PE=1 SV=1	sp|Q63342|M2GD_RAT	iSDIPVTAIR	-0.2316	0.03874	0	18	2	0
Dimethylglycine dehydrogenase, mitochondrial OS=Rattus norvegicus GN=Dmgdh PE=1 SV=1	sp|Q63342|M2GD_RAT	iTEHVEAAMEMVPVLk	-0.03401	0.4267	0	0	2	3
Dimethylglycine dehydrogenase, mitochondrial OS=Rattus norvegicus GN=Dmgdh PE=1 SV=1	sp|Q63342|M2GD_RAT	iVNAAGFWAR	-0.07706	0.2127	0	7	0	0
Dimethylglycine dehydrogenase, mitochondrial OS=Rattus norvegicus GN=Dmgdh PE=1 SV=1	sp|Q63342|M2GD_RAT	kADIINIVNGPITYSPDILPMVGPHQGVR	-0.2454	0.638	0	0	0	1
Dimethylglycine dehydrogenase, mitochondrial OS=Rattus norvegicus GN=Dmgdh PE=1 SV=1	sp|Q63342|M2GD_RAT	kIHYDSIk	0.1114	-0.08656	0	0	1	0
Dimethylglycine dehydrogenase, mitochondrial OS=Rattus norvegicus GN=Dmgdh PE=1 SV=1	sp|Q63342|M2GD_RAT	lATTPER	-0.2448	-0.07296	0	1	0	0
Dimethylglycine dehydrogenase, mitochondrial OS=Rattus norvegicus GN=Dmgdh PE=1 SV=1	sp|Q63342|M2GD_RAT	lEEETGQVVGFHQPGSIR	-0.06853	0.04431	0	1	18	5
Dimethylglycine dehydrogenase, mitochondrial OS=Rattus norvegicus GN=Dmgdh PE=1 SV=1	sp|Q63342|M2GD_RAT	lNkPADFTGk	-0.3739	0.2004	0	1	3	5
Dimethylglycine dehydrogenase, mitochondrial OS=Rattus norvegicus GN=Dmgdh PE=1 SV=1	sp|Q63342|M2GD_RAT	lTSEDLSDDVFk	0.1067	0.1688	0	3	10	3
Dimethylglycine dehydrogenase, mitochondrial OS=Rattus norvegicus GN=Dmgdh PE=1 SV=1	sp|Q63342|M2GD_RAT	lVcLTLATDDVDPEGNESVWYk	0.214	0.2603	0	1	2	34
Dimethylglycine dehydrogenase, mitochondrial OS=Rattus norvegicus GN=Dmgdh PE=1 SV=1	sp|Q63342|M2GD_RAT	lVcLTLATDDVDPEGNESVWyk	0.04033	-0.0816	0	2	1	4
Dimethylglycine dehydrogenase, mitochondrial OS=Rattus norvegicus GN=Dmgdh PE=1 SV=1	sp|Q63342|M2GD_RAT	nITDELGVLGVAGPYAR	-0.03201	0.09998	0	5	5	0
Dimethylglycine dehydrogenase, mitochondrial OS=Rattus norvegicus GN=Dmgdh PE=1 SV=1	sp|Q63342|M2GD_RAT	nYPATIIQEPLVLTEPTR	-0.1055	-0.05896	0	1	36	6
Dimethylglycine dehydrogenase, mitochondrial OS=Rattus norvegicus GN=Dmgdh PE=1 SV=1	sp|Q63342|M2GD_RAT	tNWHATEQYIIEPEk	0.2302	0.2042	0	1	12	12
Dimethylglycine dehydrogenase, mitochondrial OS=Rattus norvegicus GN=Dmgdh PE=1 SV=1	sp|Q63342|M2GD_RAT	tNWHATEQyIIEPEk	0.2816	0.1456	0	0	3	6
Dimethylglycine dehydrogenase, mitochondrial OS=Rattus norvegicus GN=Dmgdh PE=1 SV=1	sp|Q63342|M2GD_RAT	vGFTNISHMLTPR	-0.1067	0.2491	0	0	5	0
Dimethylglycine dehydrogenase, mitochondrial OS=Rattus norvegicus GN=Dmgdh PE=1 SV=1	sp|Q63342|M2GD_RAT	vGVIDLSPFGk	-0.1198	0.182	0	7	1	0
Dimethylglycine dehydrogenase, mitochondrial OS=Rattus norvegicus GN=Dmgdh PE=1 SV=1	sp|Q63342|M2GD_RAT	vIGNTTSGSYSYSIQk	-0.03495	0.4498	0	2	1	0
Dimethylglycine dehydrogenase, mitochondrial OS=Rattus norvegicus GN=Dmgdh PE=1 SV=1	sp|Q63342|M2GD_RAT	vIGNTTSGSySYSIQk	-0.1346	0.1802	0	0	1	1
Dimethylglycine dehydrogenase, mitochondrial OS=Rattus norvegicus GN=Dmgdh PE=1 SV=1	sp|Q63342|M2GD_RAT	vIGNTTSGSYSySIQk	0.1619	0.01758	0	0	1	1
Dimethylglycine dehydrogenase, mitochondrial OS=Rattus norvegicus GN=Dmgdh PE=1 SV=1	sp|Q63342|M2GD_RAT	wIEEAAVR	-0.1288	-0.0005388	0	14	0	0
Dimethylglycine dehydrogenase, mitochondrial OS=Rattus norvegicus GN=Dmgdh PE=1 SV=1	sp|Q63342|M2GD_RAT	wTTTQYTEAk	0.02229	0.008278	0	2	11	1
Dimethylglycine dehydrogenase, mitochondrial OS=Rattus norvegicus GN=Dmgdh PE=1 SV=1	sp|Q63342|M2GD_RAT	yPAPVTSLkPRPDGTWDVETPQGSVR	-0.1381	-0.04511	0	0	0	12
3-hydroxyacyl-CoA dehydrogenase type-2 OS=Rattus norvegicus GN=Hsd17b10 PE=1 SV=3	sp|O70351|HCD2_RAT	dLAPIGIR	-0.2565	-0.1172	0	10	0	0
3-hydroxyacyl-CoA dehydrogenase type-2 OS=Rattus norvegicus GN=Hsd17b10 PE=1 SV=3	sp|O70351|HCD2_RAT	eVQAALTLAk	-0.1674	0.01545	0	9	111	2
3-hydroxyacyl-CoA dehydrogenase type-2 OS=Rattus norvegicus GN=Hsd17b10 PE=1 SV=3	sp|O70351|HCD2_RAT	gGIVGMTLPIAR	-0.1537	0.03487	0	7	0	0
3-hydroxyacyl-CoA dehydrogenase type-2 OS=Rattus norvegicus GN=Hsd17b10 PE=1 SV=3	sp|O70351|HCD2_RAT	gLVAVITGGASGLGLSTAk	0.04851	0.03235	0	2	7	4
3-hydroxyacyl-CoA dehydrogenase type-2 OS=Rattus norvegicus GN=Hsd17b10 PE=1 SV=3	sp|O70351|HCD2_RAT	gVIINTASVAAFEGQVGQAAYSASk	-0.3828	0.273	0	0	0	6
3-hydroxyacyl-CoA dehydrogenase type-2 OS=Rattus norvegicus GN=Hsd17b10 PE=1 SV=3	sp|O70351|HCD2_RAT	iDVAVNcAGIAVAIk	-0.04215	0.1125	0	18	16	0
3-hydroxyacyl-CoA dehydrogenase type-2 OS=Rattus norvegicus GN=Hsd17b10 PE=1 SV=3	sp|O70351|HCD2_RAT	kLGGNcIFAPANVTSEk	-0.02955	0.1118	0	0	2	8
3-hydroxyacyl-CoA dehydrogenase type-2 OS=Rattus norvegicus GN=Hsd17b10 PE=1 SV=3	sp|O70351|HCD2_RAT	kNQVHTLEDFQR	-0.1175	-0.1914	0	0	11	11
3-hydroxyacyl-CoA dehydrogenase type-2 OS=Rattus norvegicus GN=Hsd17b10 PE=1 SV=3	sp|O70351|HCD2_RAT	lGGNcIFAPANVTSEk	-0.01849	-0.0372	0	5	14	5
3-hydroxyacyl-CoA dehydrogenase type-2 OS=Rattus norvegicus GN=Hsd17b10 PE=1 SV=3	sp|O70351|HCD2_RAT	lVAGVMGQNEPDQGGQR	0.02642	-0.1032	0	0	18	6
3-hydroxyacyl-CoA dehydrogenase type-2 OS=Rattus norvegicus GN=Hsd17b10 PE=1 SV=3	sp|O70351|HCD2_RAT	lVGQGATAVLLDVPNSEGETEAk	0.1439	-0.03714	0	5	25	83
3-hydroxyacyl-CoA dehydrogenase type-2 OS=Rattus norvegicus GN=Hsd17b10 PE=1 SV=3	sp|O70351|HCD2_RAT	lVGQGATAVLLDVPNSEGETEAkk	-0.06355	0.04994	0	0	5	10
3-hydroxyacyl-CoA dehydrogenase type-2 OS=Rattus norvegicus GN=Hsd17b10 PE=1 SV=3	sp|O70351|HCD2_RAT	nFLASQVPFPSR	-0.0507	-0.0494	0	4	3	0
3-hydroxyacyl-CoA dehydrogenase type-2 OS=Rattus norvegicus GN=Hsd17b10 PE=1 SV=3	sp|O70351|HCD2_RAT	nQVHTLEDFQR	-0.08837	-0.09307	0	1	61	17
3-hydroxyacyl-CoA dehydrogenase type-2 OS=Rattus norvegicus GN=Hsd17b10 PE=1 SV=3	sp|O70351|HCD2_RAT	rLVGQGATAVLLDVPNSEGETEAk	0.01102	0.06859	0	1	1	12
3-hydroxyacyl-CoA dehydrogenase type-2 OS=Rattus norvegicus GN=Hsd17b10 PE=1 SV=3	sp|O70351|HCD2_RAT	rLVGQGATAVLLDVPNSEGETEAkk	-0.2712	-0.09139	0	0	0	0
3-hydroxyacyl-CoA dehydrogenase type-2 OS=Rattus norvegicus GN=Hsd17b10 PE=1 SV=3	sp|O70351|HCD2_RAT	vINVNLIGTFNVIR	-0.169	-0.04461	0	2	23	0
3-hydroxyacyl-CoA dehydrogenase type-2 OS=Rattus norvegicus GN=Hsd17b10 PE=1 SV=3	sp|O70351|HCD2_RAT	vVTIAPGLFATPLLTTLPDk	-0.1361	0.01494	0	0	6	10
3-hydroxyacyl-CoA dehydrogenase type-2 OS=Rattus norvegicus GN=Hsd17b10 PE=1 SV=3	sp|O70351|HCD2_RAT	vVTIAPGLFATPLLTTLPDkVR	0.03991	-0.07646	0	0	0	1
Malate dehydrogenase, mitochondrial OS=Rattus norvegicus GN=Mdh2 PE=1 SV=2	sp|P04636|MDHM_RAT	aGAGSATLSMAYAGAR	0.2331	0.2821	0	28	40	0
Malate dehydrogenase, mitochondrial OS=Rattus norvegicus GN=Mdh2 PE=1 SV=2	sp|P04636|MDHM_RAT	aGAGSATLSMAyAGAR	-0.04051	0.1066	0	1	12	4
Malate dehydrogenase, mitochondrial OS=Rattus norvegicus GN=Mdh2 PE=1 SV=2	sp|P04636|MDHM_RAT	aNTFVAELk	-0.07643	0.1547	0	7	25	2
Malate dehydrogenase, mitochondrial OS=Rattus norvegicus GN=Mdh2 PE=1 SV=2	sp|P04636|MDHM_RAT	eGVIEcSFVQSk	0.1875	0.2805	0	6	43	9
Malate dehydrogenase, mitochondrial OS=Rattus norvegicus GN=Mdh2 PE=1 SV=2	sp|P04636|MDHM_RAT	eTEcTYFSTPLLLGk	0.2015	0.1592	0	4	9	8
Malate dehydrogenase, mitochondrial OS=Rattus norvegicus GN=Mdh2 PE=1 SV=2	sp|P04636|MDHM_RAT	eTEcTyFSTPLLLGk	0.06803	0.3509	0	0	0	3
Malate dehydrogenase, mitochondrial OS=Rattus norvegicus GN=Mdh2 PE=1 SV=2	sp|P04636|MDHM_RAT	fVFSLVDAMNGk	0.1031	0.3405	0	4	26	0
Malate dehydrogenase, mitochondrial OS=Rattus norvegicus GN=Mdh2 PE=1 SV=2	sp|P04636|MDHM_RAT	gcDVVVIPAGVPR	-0.1291	-0.01535	0	17	21	2
Malate dehydrogenase, mitochondrial OS=Rattus norvegicus GN=Mdh2 PE=1 SV=2	sp|P04636|MDHM_RAT	gYLGPEQLPDcLk	0.04542	0.2479	0	2	47	17
Malate dehydrogenase, mitochondrial OS=Rattus norvegicus GN=Mdh2 PE=1 SV=2	sp|P04636|MDHM_RAT	hGVYNPNk	-0.1679	0.3207	0	0	22	0
Malate dehydrogenase, mitochondrial OS=Rattus norvegicus GN=Mdh2 PE=1 SV=2	sp|P04636|MDHM_RAT	iFGVTTLDIVR	0.08234	0.1837	0	16	3	0
Malate dehydrogenase, mitochondrial OS=Rattus norvegicus GN=Mdh2 PE=1 SV=2	sp|P04636|MDHM_RAT	iQEAGTEVVk	0.07752	0.1184	0	0	13	2
Malate dehydrogenase, mitochondrial OS=Rattus norvegicus GN=Mdh2 PE=1 SV=2	sp|P04636|MDHM_RAT	iTPFEEk	-0.1435	0.2115	0	0	14	0
Malate dehydrogenase, mitochondrial OS=Rattus norvegicus GN=Mdh2 PE=1 SV=2	sp|P04636|MDHM_RAT	kGEDFVk	0.00498	-0.0449	0	0	2	0
Malate dehydrogenase, mitochondrial OS=Rattus norvegicus GN=Mdh2 PE=1 SV=2	sp|P04636|MDHM_RAT	kHGVYNPNk	-0.03558	0.2148	0	0	1	1
Malate dehydrogenase, mitochondrial OS=Rattus norvegicus GN=Mdh2 PE=1 SV=2	sp|P04636|MDHM_RAT	lTLYDIAHTPGVAADLSHIETR	0.08372	0.1413	0	0	2	18
Malate dehydrogenase, mitochondrial OS=Rattus norvegicus GN=Mdh2 PE=1 SV=2	sp|P04636|MDHM_RAT	lTLyDIAHTPGVAADLSHIETR	-0.1982	0.1408	0	0	0	0
Malate dehydrogenase, mitochondrial OS=Rattus norvegicus GN=Mdh2 PE=1 SV=2	sp|P04636|MDHM_RAT	mIAEAIPELk	-0.06207	0.2302	0	4	54	1
Malate dehydrogenase, mitochondrial OS=Rattus norvegicus GN=Mdh2 PE=1 SV=2	sp|P04636|MDHM_RAT	nSPLVSR	-0.1811	-0.001966	0	12	0	0
Malate dehydrogenase, mitochondrial OS=Rattus norvegicus GN=Mdh2 PE=1 SV=2	sp|P04636|MDHM_RAT	tIIPLISQcTPk	-0.173	0.2361	0	0	6	0
Malate dehydrogenase, mitochondrial OS=Rattus norvegicus GN=Mdh2 PE=1 SV=2	sp|P04636|MDHM_RAT	vAVLGASGGIGQPLSLLLk	0.08347	0.2127	0	0	7	4
Malate dehydrogenase, mitochondrial OS=Rattus norvegicus GN=Mdh2 PE=1 SV=2	sp|P04636|MDHM_RAT	vDFPQDQLATLTGR	0.0358	0.009597	0	29	23	0
Malate dehydrogenase, mitochondrial OS=Rattus norvegicus GN=Mdh2 PE=1 SV=2	sp|P04636|MDHM_RAT	vNVPVIGGHAGk	-0.06494	0.2212	0	2	26	3
Acetyl-CoA acetyltransferase, mitochondrial OS=Rattus norvegicus GN=Acat1 PE=1 SV=1	sp|P17764|THIL_RAT	dGLTDVYNk	0.2233	-0.03811	0	4	10	0
Acetyl-CoA acetyltransferase, mitochondrial OS=Rattus norvegicus GN=Acat1 PE=1 SV=1	sp|P17764|THIL_RAT	dGLTDVyNk	0.3335	0.156	0	2	1	2
Acetyl-CoA acetyltransferase, mitochondrial OS=Rattus norvegicus GN=Acat1 PE=1 SV=1	sp|P17764|THIL_RAT	eAWDAGk	0.2349	-0.04154	0	4	0	0
Acetyl-CoA acetyltransferase, mitochondrial OS=Rattus norvegicus GN=Acat1 PE=1 SV=1	sp|P17764|THIL_RAT	eEQDkYAIGSYTR	0.1046	0.1179	0	0	5	1
Acetyl-CoA acetyltransferase, mitochondrial OS=Rattus norvegicus GN=Acat1 PE=1 SV=1	sp|P17764|THIL_RAT	eEQDkYAIGSyTR	0.2663	-0.1983	0	0	1	1
Acetyl-CoA acetyltransferase, mitochondrial OS=Rattus norvegicus GN=Acat1 PE=1 SV=1	sp|P17764|THIL_RAT	eEVkEVYMGNVIQGGEGQAPTR	-0.1421	0.07059	0	2	1	1
Acetyl-CoA acetyltransferase, mitochondrial OS=Rattus norvegicus GN=Acat1 PE=1 SV=1	sp|P17764|THIL_RAT	eNGTVTAANASTLNDGAAAVVLMTAEAAQR	0.07448	0.01922	0	8	39	31
Acetyl-CoA acetyltransferase, mitochondrial OS=Rattus norvegicus GN=Acat1 PE=1 SV=1	sp|P17764|THIL_RAT	eVYMGNVIQGGEGQAPTR	0.2576	-0.03673	0	5	57	13
Acetyl-CoA acetyltransferase, mitochondrial OS=Rattus norvegicus GN=Acat1 PE=1 SV=1	sp|P17764|THIL_RAT	fANEITPITISVk	0.1264	0.09538	0	6	2	3
Acetyl-CoA acetyltransferase, mitochondrial OS=Rattus norvegicus GN=Acat1 PE=1 SV=1	sp|P17764|THIL_RAT	gATPYGGVk	-0.01825	0.07214	0	13	10	0
Acetyl-CoA acetyltransferase, mitochondrial OS=Rattus norvegicus GN=Acat1 PE=1 SV=1	sp|P17764|THIL_RAT	gkPDVVVkEDEEYk	0.04425	-0.2087	0	0	1	0
Acetyl-CoA acetyltransferase, mitochondrial OS=Rattus norvegicus GN=Acat1 PE=1 SV=1	sp|P17764|THIL_RAT	gkPDVVVkEDEEYkR	0.1109	-0.1873	0	0	0	0
Acetyl-CoA acetyltransferase, mitochondrial OS=Rattus norvegicus GN=Acat1 PE=1 SV=1	sp|P17764|THIL_RAT	iHMGNcAENTAk	0.04963	0.0284	0	0	1	32
Acetyl-CoA acetyltransferase, mitochondrial OS=Rattus norvegicus GN=Acat1 PE=1 SV=1	sp|P17764|THIL_RAT	iVVHLAHALk	-0.3027	0.1244	0	0	4	0
Acetyl-CoA acetyltransferase, mitochondrial OS=Rattus norvegicus GN=Acat1 PE=1 SV=1	sp|P17764|THIL_RAT	lEDLIVk	-0.06111	-0.01921	0	7	18	0
Acetyl-CoA acetyltransferase, mitochondrial OS=Rattus norvegicus GN=Acat1 PE=1 SV=1	sp|P17764|THIL_RAT	lGTIAIQGAIEk	0.02364	0.03636	0	12	61	7
Acetyl-CoA acetyltransferase, mitochondrial OS=Rattus norvegicus GN=Acat1 PE=1 SV=1	sp|P17764|THIL_RAT	mLEIDPQk	0.05203	0.08133	0	1	13	0
Acetyl-CoA acetyltransferase, mitochondrial OS=Rattus norvegicus GN=Acat1 PE=1 SV=1	sp|P17764|THIL_RAT	qATLGAGLPIATPcTTVNk	-0.1148	-0.02527	0	0	5	3
Acetyl-CoA acetyltransferase, mitochondrial OS=Rattus norvegicus GN=Acat1 PE=1 SV=1	sp|P17764|THIL_RAT	qGEFGLASIcNGGGGASAVLIEk	0.2685	0.08357	0	9	46	104
Acetyl-CoA acetyltransferase, mitochondrial OS=Rattus norvegicus GN=Acat1 PE=1 SV=1	sp|P17764|THIL_RAT	qGEFGLASIcNGGGGASAVLIEkL	-0.3104	0.2175	0	1	3	0
Acetyl-CoA acetyltransferase, mitochondrial OS=Rattus norvegicus GN=Acat1 PE=1 SV=1	sp|P17764|THIL_RAT	tPIGSFLGSLASQPATk	0.1666	0.04691	0	2	6	3
Acetyl-CoA acetyltransferase, mitochondrial OS=Rattus norvegicus GN=Acat1 PE=1 SV=1	sp|P17764|THIL_RAT	vcASGMk	0.2865	-0.04001	0	7	9	0
Acetyl-CoA acetyltransferase, mitochondrial OS=Rattus norvegicus GN=Acat1 PE=1 SV=1	sp|P17764|THIL_RAT	yAIGSYTR	0.1491	-0.1837	0	14	0	0
Carbonic anhydrase 3 OS=Rattus norvegicus GN=Ca3 PE=1 SV=3	sp|P14141|CAH3_RAT	eAPFNHFDPScLFPAcR	-0.1937	-0.1618	0	0	5	3
Carbonic anhydrase 3 OS=Rattus norvegicus GN=Ca3 PE=1 SV=3	sp|P14141|CAH3_RAT	ekGEFQILLDALDk	0.3235	0.287	0	0	32	68
Carbonic anhydrase 3 OS=Rattus norvegicus GN=Ca3 PE=1 SV=3	sp|P14141|CAH3_RAT	ePMTVSSDQMAk	0.09863	0.3626	0	3	19	0
Carbonic anhydrase 3 OS=Rattus norvegicus GN=Ca3 PE=1 SV=3	sp|P14141|CAH3_RAT	eWGYASHNGPEHWHELYPIAk	0.08401	0.1365	0	1	0	11
Carbonic anhydrase 3 OS=Rattus norvegicus GN=Ca3 PE=1 SV=3	sp|P14141|CAH3_RAT	eWGyASHNGPEHWHELYPIAk	0.001714	0.1616	0	0	3	3
Carbonic anhydrase 3 OS=Rattus norvegicus GN=Ca3 PE=1 SV=3	sp|P14141|CAH3_RAT	eWGYASHNGPEHWHELyPIAk	-0.09817	0.1708	0	0	0	0
Carbonic anhydrase 3 OS=Rattus norvegicus GN=Ca3 PE=1 SV=3	sp|P14141|CAH3_RAT	gDNQSPIELHTk	-0.02608	0.2002	0	2	11	8
Carbonic anhydrase 3 OS=Rattus norvegicus GN=Ca3 PE=1 SV=3	sp|P14141|CAH3_RAT	gEFQILLDALDk	0.0294	0.4593	0	6	61	2
Carbonic anhydrase 3 OS=Rattus norvegicus GN=Ca3 PE=1 SV=3	sp|P14141|CAH3_RAT	gGPLSGPYR	-0.1534	0.03865	0	27	5	0
Carbonic anhydrase 3 OS=Rattus norvegicus GN=Ca3 PE=1 SV=3	sp|P14141|CAH3_RAT	hDPSLQPWSVSYDPGSAk	0.1506	0.1089	0	2	21	32
Carbonic anhydrase 3 OS=Rattus norvegicus GN=Ca3 PE=1 SV=3	sp|P14141|CAH3_RAT	hDPSLQPWSVSyDPGSAk	0.2504	0.1846	0	0	7	11
Carbonic anhydrase 3 OS=Rattus norvegicus GN=Ca3 PE=1 SV=3	sp|P14141|CAH3_RAT	qFHLHWGSSDDHGSEHTVDGVk	0.1088	-0.3584	0	0	0	0
Carbonic anhydrase 3 OS=Rattus norvegicus GN=Ca3 PE=1 SV=3	sp|P14141|CAH3_RAT	qPDGIAVVGIFLk	-0.04427	-0.06329	0	2	8	0
Carbonic anhydrase 3 OS=Rattus norvegicus GN=Ca3 PE=1 SV=3	sp|P14141|CAH3_RAT	sLFASAENEPPVPLVGNWRPPQPIk	-0.0985	-0.06103	0	1	0	6
Carbonic anhydrase 3 OS=Rattus norvegicus GN=Ca3 PE=1 SV=3	sp|P14141|CAH3_RAT	tILNNGk	-0.06646	0.191	0	9	2	0
Carbonic anhydrase 3 OS=Rattus norvegicus GN=Ca3 PE=1 SV=3	sp|P14141|CAH3_RAT	vVFDDTFDR	0.1031	0.002161	0	86	3	0
Carbonic anhydrase 3 OS=Rattus norvegicus GN=Ca3 PE=1 SV=3	sp|P14141|CAH3_RAT	yAAELHLVHWNPk	-0.22	0.07505	0	0	0	14
Carbonic anhydrase 3 OS=Rattus norvegicus GN=Ca3 PE=1 SV=3	sp|P14141|CAH3_RAT	yNTFGEALk	0.2522	0.3471	0	3	21	2
Carbonic anhydrase 3 OS=Rattus norvegicus GN=Ca3 PE=1 SV=3	sp|P14141|CAH3_RAT	yNTFGEALk	-0.06761	-0.2794	0	1	0	0
Carbonic anhydrase 3 OS=Rattus norvegicus GN=Ca3 PE=1 SV=3	sp|P14141|CAH3_RAT	yNTFGEALkQPDGIAVVGIFLk	-0.3464	0.1801	0	0	0	0
Alpha-aminoadipic semialdehyde dehydrogenase OS=Rattus norvegicus GN=Aldh7a1 PE=1 SV=2	sp|Q64057|AL7A1_RAT	aWNIWADIPAPk	-0.07786	0.2542	0	4	3	1
Alpha-aminoadipic semialdehyde dehydrogenase OS=Rattus norvegicus GN=Aldh7a1 PE=1 SV=2	sp|Q64057|AL7A1_RAT	dYEETIGk	0.1414	0.1062	0	9	16	0
Alpha-aminoadipic semialdehyde dehydrogenase OS=Rattus norvegicus GN=Aldh7a1 PE=1 SV=2	sp|Q64057|AL7A1_RAT	dyEETIGk	0.1129	0.406	0	0	2	0
Alpha-aminoadipic semialdehyde dehydrogenase OS=Rattus norvegicus GN=Aldh7a1 PE=1 SV=2	sp|Q64057|AL7A1_RAT	eDNEGVFNGSWGGR	0.234	0.06465	0	16	48	0
Alpha-aminoadipic semialdehyde dehydrogenase OS=Rattus norvegicus GN=Aldh7a1 PE=1 SV=2	sp|Q64057|AL7A1_RAT	eGGTVVYGGk	-0.01937	0.11	0	6	4	1
Alpha-aminoadipic semialdehyde dehydrogenase OS=Rattus norvegicus GN=Aldh7a1 PE=1 SV=2	sp|Q64057|AL7A1_RAT	eSGSDAWk	0.2394	0.1288	0	4	1	0
Alpha-aminoadipic semialdehyde dehydrogenase OS=Rattus norvegicus GN=Aldh7a1 PE=1 SV=2	sp|Q64057|AL7A1_RAT	eTFAPILYVFk	0.006758	0.2046	0	2	9	1
Alpha-aminoadipic semialdehyde dehydrogenase OS=Rattus norvegicus GN=Aldh7a1 PE=1 SV=2	sp|Q64057|AL7A1_RAT	fkNEEEVFEWNNEVk	0.2521	0.04413	0	0	7	28
Alpha-aminoadipic semialdehyde dehydrogenase OS=Rattus norvegicus GN=Aldh7a1 PE=1 SV=2	sp|Q64057|AL7A1_RAT	gAPTTSLVSIAVTk	0.06286	0.2467	0	14	8	7
Alpha-aminoadipic semialdehyde dehydrogenase OS=Rattus norvegicus GN=Aldh7a1 PE=1 SV=2	sp|Q64057|AL7A1_RAT	gEVITTYcPANNEPIAR	-0.09468	0.3139	0	3	57	5
Alpha-aminoadipic semialdehyde dehydrogenase OS=Rattus norvegicus GN=Aldh7a1 PE=1 SV=2	sp|Q64057|AL7A1_RAT	gEVITTycPANNEPIAR	-0.05752	0.4771	0	0	1	1
Alpha-aminoadipic semialdehyde dehydrogenase OS=Rattus norvegicus GN=Aldh7a1 PE=1 SV=2	sp|Q64057|AL7A1_RAT	gSDcGIVNVNIPTSGAEIGGAFGGEk	0.2695	0.2008	0	4	10	63
Alpha-aminoadipic semialdehyde dehydrogenase OS=Rattus norvegicus GN=Aldh7a1 PE=1 SV=2	sp|Q64057|AL7A1_RAT	iLVEGIGEVQEYVDVcDYAAGLSR	0.2041	-0.09762	0	0	14	9
Alpha-aminoadipic semialdehyde dehydrogenase OS=Rattus norvegicus GN=Aldh7a1 PE=1 SV=2	sp|Q64057|AL7A1_RAT	kAWNIWADIPAPk	-0.07419	0.2775	0	0	0	3
Alpha-aminoadipic semialdehyde dehydrogenase OS=Rattus norvegicus GN=Aldh7a1 PE=1 SV=2	sp|Q64057|AL7A1_RAT	kEGGTVVYGGk	0.1439	0.2474	0	0	0	14
Alpha-aminoadipic semialdehyde dehydrogenase OS=Rattus norvegicus GN=Aldh7a1 PE=1 SV=2	sp|Q64057|AL7A1_RAT	kIGDALR	-0.2976	0.1196	0	0	1	0
Alpha-aminoadipic semialdehyde dehydrogenase OS=Rattus norvegicus GN=Aldh7a1 PE=1 SV=2	sp|Q64057|AL7A1_RAT	lFLHESIHDEVVDR	0.02819	0.004447	0	0	2	11
Alpha-aminoadipic semialdehyde dehydrogenase OS=Rattus norvegicus GN=Aldh7a1 PE=1 SV=2	sp|Q64057|AL7A1_RAT	lVSLEMGk	-0.08132	0.1204	0	11	4	0
Alpha-aminoadipic semialdehyde dehydrogenase OS=Rattus norvegicus GN=Aldh7a1 PE=1 SV=2	sp|Q64057|AL7A1_RAT	nAYSQIR	-0.006844	-0.01847	0	8	0	0
Alpha-aminoadipic semialdehyde dehydrogenase OS=Rattus norvegicus GN=Aldh7a1 PE=1 SV=2	sp|Q64057|AL7A1_RAT	nEEEVFEWNNEVk	0.3939	0.1591	0	2	6	3
Alpha-aminoadipic semialdehyde dehydrogenase OS=Rattus norvegicus GN=Aldh7a1 PE=1 SV=2	sp|Q64057|AL7A1_RAT	qASMkDYEETIGk	-0.574	-0.0325	0	0	1	1
Alpha-aminoadipic semialdehyde dehydrogenase OS=Rattus norvegicus GN=Aldh7a1 PE=1 SV=2	sp|Q64057|AL7A1_RAT	qAVSMFVQAVEEAk	0.2175	0.1683	0	2	20	5
Alpha-aminoadipic semialdehyde dehydrogenase OS=Rattus norvegicus GN=Aldh7a1 PE=1 SV=2	sp|Q64057|AL7A1_RAT	qAVSMFVQAVEEAkk	0.07154	0.2464	0	0	2	5
Alpha-aminoadipic semialdehyde dehydrogenase OS=Rattus norvegicus GN=Aldh7a1 PE=1 SV=2	sp|Q64057|AL7A1_RAT	qGLSSSIFTk	-0.07794	0.1754	0	2	14	2
Alpha-aminoadipic semialdehyde dehydrogenase OS=Rattus norvegicus GN=Aldh7a1 PE=1 SV=2	sp|Q64057|AL7A1_RAT	qVALMVQER	-0.2224	0.1296	0	29	0	0
Alpha-aminoadipic semialdehyde dehydrogenase OS=Rattus norvegicus GN=Aldh7a1 PE=1 SV=2	sp|Q64057|AL7A1_RAT	sTcTINYSTALPLAQGIk	0.02288	0.7067	0	0	0	2
Alpha-aminoadipic semialdehyde dehydrogenase OS=Rattus norvegicus GN=Aldh7a1 PE=1 SV=2	sp|Q64057|AL7A1_RAT	vGNPWDPNILYGPLHTk	-0.0195	0.1248	0	0	1	2
Alpha-aminoadipic semialdehyde dehydrogenase OS=Rattus norvegicus GN=Aldh7a1 PE=1 SV=2	sp|Q64057|AL7A1_RAT	vMDHPGNYVEPTIVTGLVHDAPIVHk	0.05916	0.1821	0	0	0	2
Alpha-aminoadipic semialdehyde dehydrogenase OS=Rattus norvegicus GN=Aldh7a1 PE=1 SV=2	sp|Q64057|AL7A1_RAT	vNLLSFTGSTQVGk	-0.01758	0.7869	0	0	1	0
4-hydroxyphenylpyruvate dioxygenase OS=Rattus norvegicus GN=Hpd PE=1 SV=3	sp|P32755|HPPD_RAT	aFEEEQALR	-0.1465	0.08231	0	11	4	0
4-hydroxyphenylpyruvate dioxygenase OS=Rattus norvegicus GN=Hpd PE=1 SV=3	sp|P32755|HPPD_RAT	dIAFEVEDcEHIVQk	0.06456	0.2432	0	3	24	118
4-hydroxyphenylpyruvate dioxygenase OS=Rattus norvegicus GN=Hpd PE=1 SV=3	sp|P32755|HPPD_RAT	eMGDHLVk	-0.1331	0.002073	0	1	7	0
4-hydroxyphenylpyruvate dioxygenase OS=Rattus norvegicus GN=Hpd PE=1 SV=3	sp|P32755|HPPD_RAT	eNMDVLEELk	0.06083	0.1786	0	3	16	3
4-hydroxyphenylpyruvate dioxygenase OS=Rattus norvegicus GN=Hpd PE=1 SV=3	sp|P32755|HPPD_RAT	ePWVEEDk	0.2582	0.01484	0	6	5	0
4-hydroxyphenylpyruvate dioxygenase OS=Rattus norvegicus GN=Hpd PE=1 SV=3	sp|P32755|HPPD_RAT	ePWVEEDkFGk	-0.03779	-0.002717	0	0	1	3
4-hydroxyphenylpyruvate dioxygenase OS=Rattus norvegicus GN=Hpd PE=1 SV=3	sp|P32755|HPPD_RAT	eVVSHVIk	-0.2274	0.08905	0	0	11	2
4-hydroxyphenylpyruvate dioxygenase OS=Rattus norvegicus GN=Hpd PE=1 SV=3	sp|P32755|HPPD_RAT	fAVLQTYGDTTHTLVEk	0.1209	0.609	0	0	0	1
4-hydroxyphenylpyruvate dioxygenase OS=Rattus norvegicus GN=Hpd PE=1 SV=3	sp|P32755|HPPD_RAT	fLPGFEAPTYk	-0.1306	0.1168	0	5	4	1
4-hydroxyphenylpyruvate dioxygenase OS=Rattus norvegicus GN=Hpd PE=1 SV=3	sp|P32755|HPPD_RAT	fWSVDDTQVHTEYSSLR	0.1451	0.1205	0	1	20	9
4-hydroxyphenylpyruvate dioxygenase OS=Rattus norvegicus GN=Hpd PE=1 SV=3	sp|P32755|HPPD_RAT	fWSVDDTQVHTEySSLR	0.1158	0.1121	0	0	0	12
4-hydroxyphenylpyruvate dioxygenase OS=Rattus norvegicus GN=Hpd PE=1 SV=3	sp|P32755|HPPD_RAT	gLETGSR	0.1469	-0.4991	0	1	0	0
4-hydroxyphenylpyruvate dioxygenase OS=Rattus norvegicus GN=Hpd PE=1 SV=3	sp|P32755|HPPD_RAT	gMEFLAVPSSYYR	0.337	0.3109	0	3	1	0
4-hydroxyphenylpyruvate dioxygenase OS=Rattus norvegicus GN=Hpd PE=1 SV=3	sp|P32755|HPPD_RAT	gNLTDLETNGVR	-0.1395	0.05007	0	23	2	0
4-hydroxyphenylpyruvate dioxygenase OS=Rattus norvegicus GN=Hpd PE=1 SV=3	sp|P32755|HPPD_RAT	hNHQGFGAGNFNSLFk	0.06203	0.3495	0	0	0	2
4-hydroxyphenylpyruvate dioxygenase OS=Rattus norvegicus GN=Hpd PE=1 SV=3	sp|P32755|HPPD_RAT	iLVDYDEk	0.1021	0.3432	0	3	7	0
4-hydroxyphenylpyruvate dioxygenase OS=Rattus norvegicus GN=Hpd PE=1 SV=3	sp|P32755|HPPD_RAT	iVREPWVEEDkFGk	-0.5135	-0.1042	0	0	0	1
4-hydroxyphenylpyruvate dioxygenase OS=Rattus norvegicus GN=Hpd PE=1 SV=3	sp|P32755|HPPD_RAT	lPScNLEIIDHIVGNQPDQEMESASEWYLk	0.5525	0.08476	0	0	0	6
4-hydroxyphenylpyruvate dioxygenase OS=Rattus norvegicus GN=Hpd PE=1 SV=3	sp|P32755|HPPD_RAT	lPScNLEIIDHIVGNQPDQEMESASEWyLk	0.3112	-0.07353	0	0	0	2
4-hydroxyphenylpyruvate dioxygenase OS=Rattus norvegicus GN=Hpd PE=1 SV=3	sp|P32755|HPPD_RAT	mGFEPLAYk	-0.1087	0.2071	0	1	12	3
4-hydroxyphenylpyruvate dioxygenase OS=Rattus norvegicus GN=Hpd PE=1 SV=3	sp|P32755|HPPD_RAT	mPINEPAPGR	-0.2026	-0.02004	0	12	7	0
4-hydroxyphenylpyruvate dioxygenase OS=Rattus norvegicus GN=Hpd PE=1 SV=3	sp|P32755|HPPD_RAT	qAASFYcNk	0.02574	0.1642	0	4	2	0
4-hydroxyphenylpyruvate dioxygenase OS=Rattus norvegicus GN=Hpd PE=1 SV=3	sp|P32755|HPPD_RAT	sIVVANYEESIk	0.03251	0.01834	0	7	32	4
4-hydroxyphenylpyruvate dioxygenase OS=Rattus norvegicus GN=Hpd PE=1 SV=3	sp|P32755|HPPD_RAT	sQIQEYVDYNGGAGVQHIALR	0.231	0.1452	0	1	46	35
4-hydroxyphenylpyruvate dioxygenase OS=Rattus norvegicus GN=Hpd PE=1 SV=3	sp|P32755|HPPD_RAT	sQIQEyVDYNGGAGVQHIALR	0.02255	0.1547	0	0	2	19
4-hydroxyphenylpyruvate dioxygenase OS=Rattus norvegicus GN=Hpd PE=1 SV=3	sp|P32755|HPPD_RAT	sQIQEYVDyNGGAGVQHIALR	-0.05384	0.1287	0	0	0	0
4-hydroxyphenylpyruvate dioxygenase OS=Rattus norvegicus GN=Hpd PE=1 SV=3	sp|P32755|HPPD_RAT	tEDIITTIR	-0.1966	0.01835	0	22	4	0
Keratin, type II cytoskeletal 8 OS=Rattus norvegicus GN=Krt8 PE=1 SV=3	sp|Q10758|K2C8_RAT	aEAETMYQIk	0.04764	-0.0527	0	3	13	1
Keratin, type II cytoskeletal 8 OS=Rattus norvegicus GN=Krt8 PE=1 SV=3	sp|Q10758|K2C8_RAT	aEAETMyQIk	-0.02839	-0.1141	0	3	2	4
Keratin, type II cytoskeletal 8 OS=Rattus norvegicus GN=Krt8 PE=1 SV=3	sp|Q10758|K2C8_RAT	aQYEEIANR	-0.0999	-0.2791	0	20	1	0
Keratin, type II cytoskeletal 8 OS=Rattus norvegicus GN=Krt8 PE=1 SV=3	sp|Q10758|K2C8_RAT	aTLEAAIADAEQR	0.1098	-0.06984	0	3	3	0
Keratin, type II cytoskeletal 8 OS=Rattus norvegicus GN=Krt8 PE=1 SV=3	sp|Q10758|K2C8_RAT	aTLEAAIADAEQRGELAVk	-0.2125	-0.3735	0	0	0	5
Keratin, type II cytoskeletal 8 OS=Rattus norvegicus GN=Krt8 PE=1 SV=3	sp|Q10758|K2C8_RAT	dVDEAYMNk	0.2371	-0.1364	0	0	11	2
Keratin, type II cytoskeletal 8 OS=Rattus norvegicus GN=Krt8 PE=1 SV=3	sp|Q10758|K2C8_RAT	dVDEAyMNk	0.188	0.0118	0	1	1	4
Keratin, type II cytoskeletal 8 OS=Rattus norvegicus GN=Krt8 PE=1 SV=3	sp|Q10758|K2C8_RAT	dVDEAYMNkVELESR	0.05443	0.2155	0	0	1	4
Keratin, type II cytoskeletal 8 OS=Rattus norvegicus GN=Krt8 PE=1 SV=3	sp|Q10758|K2C8_RAT	eLQSQISDTSVVLSMDNSR	0.1121	-0.07966	0	0	33	3
Keratin, type II cytoskeletal 8 OS=Rattus norvegicus GN=Krt8 PE=1 SV=3	sp|Q10758|K2C8_RAT	gSLGGFGGAGVGGITAVTVNQSLLNPLk	-0.19	-0.08292	0	1	0	15
Keratin, type II cytoskeletal 8 OS=Rattus norvegicus GN=Krt8 PE=1 SV=3	sp|Q10758|K2C8_RAT	iSSSSFSR	-0.03737	-0.4077	0	12	0	0
Keratin, type II cytoskeletal 8 OS=Rattus norvegicus GN=Krt8 PE=1 SV=3	sp|Q10758|K2C8_RAT	lEGLTDEINFLR	0.1089	-0.1367	0	10	1	0
Keratin, type II cytoskeletal 8 OS=Rattus norvegicus GN=Krt8 PE=1 SV=3	sp|Q10758|K2C8_RAT	lESGMQNMSIHTk	0.2283	-0.1957	0	0	3	6
Keratin, type II cytoskeletal 8 OS=Rattus norvegicus GN=Krt8 PE=1 SV=3	sp|Q10758|K2C8_RAT	lEVDPNIQAVR	-0.2083	-0.269	0	6	32	1
Keratin, type II cytoskeletal 8 OS=Rattus norvegicus GN=Krt8 PE=1 SV=3	sp|Q10758|K2C8_RAT	lEVELGNMQGLVEDFk	-1.455	0.6279	0	0	1	1
Keratin, type II cytoskeletal 8 OS=Rattus norvegicus GN=Krt8 PE=1 SV=3	sp|Q10758|K2C8_RAT	lkLEVELGNMQGLVEDFk	0.2063	-0.1041	0	0	5	3
Keratin, type II cytoskeletal 8 OS=Rattus norvegicus GN=Krt8 PE=1 SV=3	sp|Q10758|K2C8_RAT	lQAEIDALk	-0.1953	-0.2344	0	13	61	1
Keratin, type II cytoskeletal 8 OS=Rattus norvegicus GN=Krt8 PE=1 SV=3	sp|Q10758|K2C8_RAT	lVSESSDIMSk	0.09964	-0.4014	0	3	11	0
Keratin, type II cytoskeletal 8 OS=Rattus norvegicus GN=Krt8 PE=1 SV=3	sp|Q10758|K2C8_RAT	mSTSGPR	-0.5606	-0.1946	0	1	0	0
Keratin, type II cytoskeletal 8 OS=Rattus norvegicus GN=Krt8 PE=1 SV=3	sp|Q10758|K2C8_RAT	qIHEEEIRELQSQISDTSVVLSMDNSR	0.3155	-0.07816	0	0	0	7
Keratin, type II cytoskeletal 8 OS=Rattus norvegicus GN=Krt8 PE=1 SV=3	sp|Q10758|K2C8_RAT	qLEALGQEk	0.1151	-0.1786	0	0	23	2
Keratin, type II cytoskeletal 8 OS=Rattus norvegicus GN=Krt8 PE=1 SV=3	sp|Q10758|K2C8_RAT	rTEMENEFVLIk	0.1032	-0.1342	0	0	0	1
Keratin, type II cytoskeletal 8 OS=Rattus norvegicus GN=Krt8 PE=1 SV=3	sp|Q10758|K2C8_RAT	sFTSGPGAR	-0.2752	-0.5138	0	4	0	0
Keratin, type II cytoskeletal 8 OS=Rattus norvegicus GN=Krt8 PE=1 SV=3	sp|Q10758|K2C8_RAT	skTEISEMNR	-0.1593	-0.3152	0	0	3	1
Keratin, type II cytoskeletal 8 OS=Rattus norvegicus GN=Krt8 PE=1 SV=3	sp|Q10758|K2C8_RAT	sLDMDSIIAEVR	-0.00827	-0.286	0	28	25	0
Keratin, type II cytoskeletal 8 OS=Rattus norvegicus GN=Krt8 PE=1 SV=3	sp|Q10758|K2C8_RAT	sNMDNMFESYINNLR	0.8175	-0.2618	0	0	1	0
Keratin, type II cytoskeletal 8 OS=Rattus norvegicus GN=Krt8 PE=1 SV=3	sp|Q10758|K2C8_RAT	sNMDNMFESYINNLRR	-0.2266	-0.5572	0	0	0	2
Keratin, type II cytoskeletal 8 OS=Rattus norvegicus GN=Krt8 PE=1 SV=3	sp|Q10758|K2C8_RAT	sRAEAETMYQIk	-0.1097	0.04925	0	0	1	0
Keratin, type II cytoskeletal 8 OS=Rattus norvegicus GN=Krt8 PE=1 SV=3	sp|Q10758|K2C8_RAT	tEISEMNR	0.1807	-0.09961	0	8	2	0
Keratin, type II cytoskeletal 8 OS=Rattus norvegicus GN=Krt8 PE=1 SV=3	sp|Q10758|K2C8_RAT	tEMENEFVLIk	0.06367	0.02494	0	8	30	4
Keratin, type II cytoskeletal 8 OS=Rattus norvegicus GN=Krt8 PE=1 SV=3	sp|Q10758|K2C8_RAT	tEMENEFVLIkk	0.06697	-0.09143	0	0	2	10
Keratin, type II cytoskeletal 8 OS=Rattus norvegicus GN=Krt8 PE=1 SV=3	sp|Q10758|K2C8_RAT	vGSSSSSFR	-0.05173	-0.2496	0	22	7	0
Keratin, type II cytoskeletal 8 OS=Rattus norvegicus GN=Krt8 PE=1 SV=3	sp|Q10758|K2C8_RAT	yEELQTLAGk	-0.0958	-0.1824	0	3	53	1
Alpha-enolase OS=Rattus norvegicus GN=Eno1 PE=1 SV=4	sp|P04764|ENOA_RAT	aGkYDLDFk	-0.7027	0.1018	0	0	0	1
Alpha-enolase OS=Rattus norvegicus GN=Eno1 PE=1 SV=4	sp|P04764|ENOA_RAT	aGYTDQVVIGMDVAASEFYR	0.3352	-0.06736	0	15	26	0
Alpha-enolase OS=Rattus norvegicus GN=Eno1 PE=1 SV=4	sp|P04764|ENOA_RAT	aGYTDQVVIGMDVAASEFyR	0.2299	0.1022	0	0	0	5
Alpha-enolase OS=Rattus norvegicus GN=Eno1 PE=1 SV=4	sp|P04764|ENOA_RAT	dATNVGDEGGFAPNILENk	-0.03594	0.1292	0	1	18	4
Alpha-enolase OS=Rattus norvegicus GN=Eno1 PE=1 SV=4	sp|P04764|ENOA_RAT	dYPVVSIEDPFDQDDWDAWQk	0.763	-0.04874	0	1	5	35
Alpha-enolase OS=Rattus norvegicus GN=Eno1 PE=1 SV=4	sp|P04764|ENOA_RAT	dyPVVSIEDPFDQDDWDAWQk	0.2844	0.4939	0	0	0	1
Alpha-enolase OS=Rattus norvegicus GN=Eno1 PE=1 SV=4	sp|P04764|ENOA_RAT	eALELLk	-0.1084	0.02084	0	5	13	0
Alpha-enolase OS=Rattus norvegicus GN=Eno1 PE=1 SV=4	sp|P04764|ENOA_RAT	fTATAGIQVVGDDLTVTNPk	0.0401	0.1584	0	2	77	76
Alpha-enolase OS=Rattus norvegicus GN=Eno1 PE=1 SV=4	sp|P04764|ENOA_RAT	gNPTVEVDLYTAk	0.09835	0.05434	0	6	35	10
Alpha-enolase OS=Rattus norvegicus GN=Eno1 PE=1 SV=4	sp|P04764|ENOA_RAT	hIADLAGNPEVILPVPAFNVINGGSHAGNk	0.2463	-0.09542	0	0	0	1
Alpha-enolase OS=Rattus norvegicus GN=Eno1 PE=1 SV=4	sp|P04764|ENOA_RAT	iDQLMIEMDGTENk	0.22	0.03299	0	5	47	5
Alpha-enolase OS=Rattus norvegicus GN=Eno1 PE=1 SV=4	sp|P04764|ENOA_RAT	iEEELGSk	-0.003414	0.03553	0	1	4	0
Alpha-enolase OS=Rattus norvegicus GN=Eno1 PE=1 SV=4	sp|P04764|ENOA_RAT	iGAEVYHNLk	-0.1048	0.04302	0	4	12	2
Alpha-enolase OS=Rattus norvegicus GN=Eno1 PE=1 SV=4	sp|P04764|ENOA_RAT	kLNVVEQEk	0.03267	0.1213	0	0	5	5
Alpha-enolase OS=Rattus norvegicus GN=Eno1 PE=1 SV=4	sp|P04764|ENOA_RAT	kLNVVEQEkIDQLMIEMDGTENk	-0.537	0.1817	0	0	0	2
Alpha-enolase OS=Rattus norvegicus GN=Eno1 PE=1 SV=4	sp|P04764|ENOA_RAT	lAMQEFMILPVGASSFR	0.1075	0.2062	0	3	10	0
Alpha-enolase OS=Rattus norvegicus GN=Eno1 PE=1 SV=4	sp|P04764|ENOA_RAT	lNVVEQEk	-0.2492	0.06105	0	7	0	0
Alpha-enolase OS=Rattus norvegicus GN=Eno1 PE=1 SV=4	sp|P04764|ENOA_RAT	lNVVEQEkIDQLMIEMDGTENk	-0.5811	0.2151	0	1	1	5
Alpha-enolase OS=Rattus norvegicus GN=Eno1 PE=1 SV=4	sp|P04764|ENOA_RAT	scNcLLLk	0.1438	0.1111	0	5	0	0
Alpha-enolase OS=Rattus norvegicus GN=Eno1 PE=1 SV=4	sp|P04764|ENOA_RAT	sPDDASR	0.3098	0.7766	0	0	1	0
Alpha-enolase OS=Rattus norvegicus GN=Eno1 PE=1 SV=4	sp|P04764|ENOA_RAT	tIAPALVSk	-0.1718	0.08012	0	10	6	0
Alpha-enolase OS=Rattus norvegicus GN=Eno1 PE=1 SV=4	sp|P04764|ENOA_RAT	yITPDQLADLYk	0.0744	-0.03106	0	10	29	6
Electron transfer flavoprotein-ubiquinone oxidoreductase, mitochondrial OS=Rattus norvegicus GN=Etfdh PE=2 SV=1	sp|Q6UPE1|ETFD_RAT	aAQIGAHTLSGAcLDPAAFk	-0.2547	-0.1599	0	0	0	2
Electron transfer flavoprotein-ubiquinone oxidoreductase, mitochondrial OS=Rattus norvegicus GN=Etfdh PE=2 SV=1	sp|Q6UPE1|ETFD_RAT	aLNEGGLQSIPk	-0.1011	-0.2085	0	6	19	6
Electron transfer flavoprotein-ubiquinone oxidoreductase, mitochondrial OS=Rattus norvegicus GN=Etfdh PE=2 SV=1	sp|Q6UPE1|ETFD_RAT	aScDAQTYGIGLk	0.1198	-0.1687	0	10	10	4
Electron transfer flavoprotein-ubiquinone oxidoreductase, mitochondrial OS=Rattus norvegicus GN=Etfdh PE=2 SV=1	sp|Q6UPE1|ETFD_RAT	aScDAQTyGIGLk	0.05424	-0.06482	0	0	4	0
Electron transfer flavoprotein-ubiquinone oxidoreductase, mitochondrial OS=Rattus norvegicus GN=Etfdh PE=2 SV=1	sp|Q6UPE1|ETFD_RAT	dDSIPVNR	-0.06451	-0.2328	0	5	0	0
Electron transfer flavoprotein-ubiquinone oxidoreductase, mitochondrial OS=Rattus norvegicus GN=Etfdh PE=2 SV=1	sp|Q6UPE1|ETFD_RAT	dPSQNINWVVPEGGGGPAYNGM	0.1838	-0.2671	0	0	26	0
Electron transfer flavoprotein-ubiquinone oxidoreductase, mitochondrial OS=Rattus norvegicus GN=Etfdh PE=2 SV=1	sp|Q6UPE1|ETFD_RAT	eLFPDWk	0.1141	-0.173	0	1	13	0
Electron transfer flavoprotein-ubiquinone oxidoreductase, mitochondrial OS=Rattus norvegicus GN=Etfdh PE=2 SV=1	sp|Q6UPE1|ETFD_RAT	eLWVIDEk	0.06181	-0.2946	0	0	9	0
Electron transfer flavoprotein-ubiquinone oxidoreductase, mitochondrial OS=Rattus norvegicus GN=Etfdh PE=2 SV=1	sp|Q6UPE1|ETFD_RAT	fAEEADVVIVGAGPAGLSAAIR	-0.04326	-0.2376	0	22	84	2
Electron transfer flavoprotein-ubiquinone oxidoreductase, mitochondrial OS=Rattus norvegicus GN=Etfdh PE=2 SV=1	sp|Q6UPE1|ETFD_RAT	fAILTEk	-0.05898	-0.206	0	12	1	0
Electron transfer flavoprotein-ubiquinone oxidoreductase, mitochondrial OS=Rattus norvegicus GN=Etfdh PE=2 SV=1	sp|Q6UPE1|ETFD_RAT	fcPAGVYEFVPLEQGDGFR	0.02916	0.00284	0	1	6	3
Electron transfer flavoprotein-ubiquinone oxidoreductase, mitochondrial OS=Rattus norvegicus GN=Etfdh PE=2 SV=1	sp|Q6UPE1|ETFD_RAT	gAPLNTPVTEDR	-0.1016	-0.1687	0	7	1	0
Electron transfer flavoprotein-ubiquinone oxidoreductase, mitochondrial OS=Rattus norvegicus GN=Etfdh PE=2 SV=1	sp|Q6UPE1|ETFD_RAT	gIATNDVGIQk	-0.1028	-0.1309	0	4	19	1
Electron transfer flavoprotein-ubiquinone oxidoreductase, mitochondrial OS=Rattus norvegicus GN=Etfdh PE=2 SV=1	sp|Q6UPE1|ETFD_RAT	gLELHAk	-0.07575	-0.2768	0	1	6	0
Electron transfer flavoprotein-ubiquinone oxidoreductase, mitochondrial OS=Rattus norvegicus GN=Etfdh PE=2 SV=1	sp|Q6UPE1|ETFD_RAT	gMEPWTLk	0.01589	-0.1224	0	1	7	0
Electron transfer flavoprotein-ubiquinone oxidoreductase, mitochondrial OS=Rattus norvegicus GN=Etfdh PE=2 SV=1	sp|Q6UPE1|ETFD_RAT	gSDSEQLkPAk	0.1039	-0.2112	0	0	6	3
Electron transfer flavoprotein-ubiquinone oxidoreductase, mitochondrial OS=Rattus norvegicus GN=Etfdh PE=2 SV=1	sp|Q6UPE1|ETFD_RAT	gTHTAMk	0.162	-0.2298	0	0	1	0
Electron transfer flavoprotein-ubiquinone oxidoreductase, mitochondrial OS=Rattus norvegicus GN=Etfdh PE=2 SV=1	sp|Q6UPE1|ETFD_RAT	hRIPVPILPGLPMNNHGNYIVR	-0.2606	-0.2137	0	0	0	1
Electron transfer flavoprotein-ubiquinone oxidoreductase, mitochondrial OS=Rattus norvegicus GN=Etfdh PE=2 SV=1	sp|Q6UPE1|ETFD_RAT	iPVPILPGLPMNNHGNYIVR	-0.1936	-0.1205	0	0	2	3
Electron transfer flavoprotein-ubiquinone oxidoreductase, mitochondrial OS=Rattus norvegicus GN=Etfdh PE=2 SV=1	sp|Q6UPE1|ETFD_RAT	lQINAQNcVHck	0.03734	-0.2226	0	2	9	3
Electron transfer flavoprotein-ubiquinone oxidoreductase, mitochondrial OS=Rattus norvegicus GN=Etfdh PE=2 SV=1	sp|Q6UPE1|ETFD_RAT	lTFPGGLLIGcSPGFMNVPk	-0.1807	-0.002878	0	0	6	4
Electron transfer flavoprotein-ubiquinone oxidoreductase, mitochondrial OS=Rattus norvegicus GN=Etfdh PE=2 SV=1	sp|Q6UPE1|ETFD_RAT	nLSIYDGPEQR	-0.05679	-0.3097	0	12	21	0
Electron transfer flavoprotein-ubiquinone oxidoreductase, mitochondrial OS=Rattus norvegicus GN=Etfdh PE=2 SV=1	sp|Q6UPE1|ETFD_RAT	qLAAEQEk	0.2805	-0.01999	0	4	1	0
Electron transfer flavoprotein-ubiquinone oxidoreductase, mitochondrial OS=Rattus norvegicus GN=Etfdh PE=2 SV=1	sp|Q6UPE1|ETFD_RAT	qLAAEQEkDIR	-0.5376	-0.3057	0	1	3	0
Electron transfer flavoprotein-ubiquinone oxidoreductase, mitochondrial OS=Rattus norvegicus GN=Etfdh PE=2 SV=1	sp|Q6UPE1|ETFD_RAT	qLTSENLQSk	-0.02548	-0.1803	0	1	21	0
Electron transfer flavoprotein-ubiquinone oxidoreductase, mitochondrial OS=Rattus norvegicus GN=Etfdh PE=2 SV=1	sp|Q6UPE1|ETFD_RAT	rWEGVNMER	-0.1402	-0.1348	0	0	1	0
Electron transfer flavoprotein-ubiquinone oxidoreductase, mitochondrial OS=Rattus norvegicus GN=Etfdh PE=2 SV=1	sp|Q6UPE1|ETFD_RAT	sGSLAAEAIFk	-0.08634	-0.06538	0	3	44	5
Electron transfer flavoprotein-ubiquinone oxidoreductase, mitochondrial OS=Rattus norvegicus GN=Etfdh PE=2 SV=1	sp|Q6UPE1|ETFD_RAT	tAGLHVTEYEDNLk	0.1144	-0.1132	0	1	1	7
Electron transfer flavoprotein-ubiquinone oxidoreductase, mitochondrial OS=Rattus norvegicus GN=Etfdh PE=2 SV=1	sp|Q6UPE1|ETFD_RAT	tAGLHVTEyEDNLk	0.04113	-0.1899	0	0	2	5
Electron transfer flavoprotein-ubiquinone oxidoreductase, mitochondrial OS=Rattus norvegicus GN=Etfdh PE=2 SV=1	sp|Q6UPE1|ETFD_RAT	tcDIkDPSQNINWVVPEGGGGPAYNGM	0.3085	-0.05825	0	0	2	15
Electron transfer flavoprotein-ubiquinone oxidoreductase, mitochondrial OS=Rattus norvegicus GN=Etfdh PE=2 SV=1	sp|Q6UPE1|ETFD_RAT	vDHTVGWPLDR	0.01875	-0.2461	0	3	10	2
Electron transfer flavoprotein-ubiquinone oxidoreductase, mitochondrial OS=Rattus norvegicus GN=Etfdh PE=2 SV=1	sp|Q6UPE1|ETFD_RAT	vTIFAEGcHGHLAk	0.02996	-0.1256	0	0	2	4
Electron transfer flavoprotein-ubiquinone oxidoreductase, mitochondrial OS=Rattus norvegicus GN=Etfdh PE=2 SV=1	sp|Q6UPE1|ETFD_RAT	wEGVNMER	0.1181	-0.3222	0	7	0	0
Sarcosine dehydrogenase, mitochondrial OS=Rattus norvegicus GN=Sardh PE=1 SV=2	sp|Q64380|SARDH_RAT	aAGHLVR	0.009911	0.5242	0	1	0	0
Sarcosine dehydrogenase, mitochondrial OS=Rattus norvegicus GN=Sardh PE=1 SV=2	sp|Q64380|SARDH_RAT	aDFGFTVNk	0.1635	0.1945	0	4	5	0
Sarcosine dehydrogenase, mitochondrial OS=Rattus norvegicus GN=Sardh PE=1 SV=2	sp|Q64380|SARDH_RAT	aIDSLSIEk	0.01221	0.1024	0	3	11	3
Sarcosine dehydrogenase, mitochondrial OS=Rattus norvegicus GN=Sardh PE=1 SV=2	sp|Q64380|SARDH_RAT	aVMAAGAk	-0.08939	0.06842	0	5	1	0
Sarcosine dehydrogenase, mitochondrial OS=Rattus norvegicus GN=Sardh PE=1 SV=2	sp|Q64380|SARDH_RAT	aYGIESHVLSPAETk	0.07869	0.2215	0	1	13	26
Sarcosine dehydrogenase, mitochondrial OS=Rattus norvegicus GN=Sardh PE=1 SV=2	sp|Q64380|SARDH_RAT	ayGIESHVLSPAETk	0.0768	-0.03435	0	0	0	1
Sarcosine dehydrogenase, mitochondrial OS=Rattus norvegicus GN=Sardh PE=1 SV=2	sp|Q64380|SARDH_RAT	cQLMDcSEDLGMLSIQGPASR	0.5428	-0.0113	0	0	9	1
Sarcosine dehydrogenase, mitochondrial OS=Rattus norvegicus GN=Sardh PE=1 SV=2	sp|Q64380|SARDH_RAT	dGTMDPAGTcTTLTR	0.1615	0.02703	0	7	3	0
Sarcosine dehydrogenase, mitochondrial OS=Rattus norvegicus GN=Sardh PE=1 SV=2	sp|Q64380|SARDH_RAT	dHDASVYLR	0.1667	0.1571	0	1	2	0
Sarcosine dehydrogenase, mitochondrial OS=Rattus norvegicus GN=Sardh PE=1 SV=2	sp|Q64380|SARDH_RAT	dHDASVyLR	-0.03187	0.722	0	1	0	0
Sarcosine dehydrogenase, mitochondrial OS=Rattus norvegicus GN=Sardh PE=1 SV=2	sp|Q64380|SARDH_RAT	dLYPLMNVDDLYGTLYVPR	0.244	0.3365	0	0	5	0
Sarcosine dehydrogenase, mitochondrial OS=Rattus norvegicus GN=Sardh PE=1 SV=2	sp|Q64380|SARDH_RAT	dMYSYDIR	0.3279	0.09517	0	5	0	0
Sarcosine dehydrogenase, mitochondrial OS=Rattus norvegicus GN=Sardh PE=1 SV=2	sp|Q64380|SARDH_RAT	dPLHEELLGQGcVFQER	0.1791	0.2165	0	0	6	2
Sarcosine dehydrogenase, mitochondrial OS=Rattus norvegicus GN=Sardh PE=1 SV=2	sp|Q64380|SARDH_RAT	dPSGGPVSLDFVk	0.03674	0.141	0	4	10	3
Sarcosine dehydrogenase, mitochondrial OS=Rattus norvegicus GN=Sardh PE=1 SV=2	sp|Q64380|SARDH_RAT	gAQVIENcAVTGIR	0.07099	0.0933	0	5	27	0
Sarcosine dehydrogenase, mitochondrial OS=Rattus norvegicus GN=Sardh PE=1 SV=2	sp|Q64380|SARDH_RAT	hGLVNAGYR	0.02363	-0.2035	0	1	1	0
Sarcosine dehydrogenase, mitochondrial OS=Rattus norvegicus GN=Sardh PE=1 SV=2	sp|Q64380|SARDH_RAT	iEGIQNMPNVR	-0.144	0.1577	0	10	2	0
Sarcosine dehydrogenase, mitochondrial OS=Rattus norvegicus GN=Sardh PE=1 SV=2	sp|Q64380|SARDH_RAT	lGVGGVVLLER	-0.07081	0.1914	0	7	0	0
Sarcosine dehydrogenase, mitochondrial OS=Rattus norvegicus GN=Sardh PE=1 SV=2	sp|Q64380|SARDH_RAT	lQGDALSVGGYEANPIFWDEVSDk	0.4043	0.1325	0	2	10	37
Sarcosine dehydrogenase, mitochondrial OS=Rattus norvegicus GN=Sardh PE=1 SV=2	sp|Q64380|SARDH_RAT	lQGDALSVGGyEANPIFWDEVSDk	0.4565	0.4061	0	0	2	6
Sarcosine dehydrogenase, mitochondrial OS=Rattus norvegicus GN=Sardh PE=1 SV=2	sp|Q64380|SARDH_RAT	lSFVGELGWELHVPQAScLPVYR	0.3283	0.1774	0	0	2	0
Sarcosine dehydrogenase, mitochondrial OS=Rattus norvegicus GN=Sardh PE=1 SV=2	sp|Q64380|SARDH_RAT	lVcLTVEEEVPMFGLEAIWR	-3.807	-6.644	0	2	0	0
Sarcosine dehydrogenase, mitochondrial OS=Rattus norvegicus GN=Sardh PE=1 SV=2	sp|Q64380|SARDH_RAT	mGVTYAAQVHLk	-0.07115	0.1845	0	1	5	1
Sarcosine dehydrogenase, mitochondrial OS=Rattus norvegicus GN=Sardh PE=1 SV=2	sp|Q64380|SARDH_RAT	nGDYALER	-0.06601	0.08334	0	5	1	0
Sarcosine dehydrogenase, mitochondrial OS=Rattus norvegicus GN=Sardh PE=1 SV=2	sp|Q64380|SARDH_RAT	nGDyALER	-0.05732	0.1995	0	1	0	0
Sarcosine dehydrogenase, mitochondrial OS=Rattus norvegicus GN=Sardh PE=1 SV=2	sp|Q64380|SARDH_RAT	nGQVVGHVR	-0.07565	-0.3954	0	0	1	0
Sarcosine dehydrogenase, mitochondrial OS=Rattus norvegicus GN=Sardh PE=1 SV=2	sp|Q64380|SARDH_RAT	nYSVVFPHDEPLAGR	0.1152	0.1611	0	1	18	7
Sarcosine dehydrogenase, mitochondrial OS=Rattus norvegicus GN=Sardh PE=1 SV=2	sp|Q64380|SARDH_RAT	nySVVFPHDEPLAGR	-0.1261	0.1984	0	0	3	7
Sarcosine dehydrogenase, mitochondrial OS=Rattus norvegicus GN=Sardh PE=1 SV=2	sp|Q64380|SARDH_RAT	qRATGLR	1.305	0.6078	0	1	0	0
Sarcosine dehydrogenase, mitochondrial OS=Rattus norvegicus GN=Sardh PE=1 SV=2	sp|Q64380|SARDH_RAT	qVVSHDLEEETGLHTGWIQNGGLFIASNQQR	0.07909	0.4457	0	0	0	5
Sarcosine dehydrogenase, mitochondrial OS=Rattus norvegicus GN=Sardh PE=1 SV=2	sp|Q64380|SARDH_RAT	rADFGFTVNk	-0.02373	0.3136	0	0	7	2
Sarcosine dehydrogenase, mitochondrial OS=Rattus norvegicus GN=Sardh PE=1 SV=2	sp|Q64380|SARDH_RAT	rDPLHEELLGQGcVFQER	0.199	-0.05549	0	0	3	21
Sarcosine dehydrogenase, mitochondrial OS=Rattus norvegicus GN=Sardh PE=1 SV=2	sp|Q64380|SARDH_RAT	sDDSPLEAGLAFTck	0.163	0.1312	0	3	23	12
Sarcosine dehydrogenase, mitochondrial OS=Rattus norvegicus GN=Sardh PE=1 SV=2	sp|Q64380|SARDH_RAT	sPFDPDNk	0.1924	0.1879	0	5	0	0
Sarcosine dehydrogenase, mitochondrial OS=Rattus norvegicus GN=Sardh PE=1 SV=2	sp|Q64380|SARDH_RAT	sPFDPDNkR	-0.02044	-0.05023	0	1	6	0
Sarcosine dehydrogenase, mitochondrial OS=Rattus norvegicus GN=Sardh PE=1 SV=2	sp|Q64380|SARDH_RAT	sTVcGPESFTPDHkPLMGEAPELR	0.0933	0.1542	0	3	0	8
Sarcosine dehydrogenase, mitochondrial OS=Rattus norvegicus GN=Sardh PE=1 SV=2	sp|Q64380|SARDH_RAT	sVPYQcTLk	0.03563	0.1864	0	13	7	1
Sarcosine dehydrogenase, mitochondrial OS=Rattus norvegicus GN=Sardh PE=1 SV=2	sp|Q64380|SARDH_RAT	tAAAVFNMSYFGk	0.1896	0.3015	0	0	1	0
Sarcosine dehydrogenase, mitochondrial OS=Rattus norvegicus GN=Sardh PE=1 SV=2	sp|Q64380|SARDH_RAT	tDDFGVR	-0.05393	0.08459	0	9	0	0
Sarcosine dehydrogenase, mitochondrial OS=Rattus norvegicus GN=Sardh PE=1 SV=2	sp|Q64380|SARDH_RAT	tIAYGYIR	0.03746	0.06112	0	15	1	0
Sarcosine dehydrogenase, mitochondrial OS=Rattus norvegicus GN=Sardh PE=1 SV=2	sp|Q64380|SARDH_RAT	tSVPFLGR	-0.143	0.3192	0	1	0	0
Sarcosine dehydrogenase, mitochondrial OS=Rattus norvegicus GN=Sardh PE=1 SV=2	sp|Q64380|SARDH_RAT	vPLVAMHHAYVVTER	0.1331	0.2774	0	0	0	1
Sarcosine dehydrogenase, mitochondrial OS=Rattus norvegicus GN=Sardh PE=1 SV=2	sp|Q64380|SARDH_RAT	vRTDDFGVR	0.2896	0.1931	0	0	1	0
Alanine--glyoxylate aminotransferase 2, mitochondrial OS=Rattus norvegicus GN=Agxt2 PE=1 SV=2	sp|Q64565|AGT2_RAT	aYSNHTDIISFR	0.1401	0.09903	0	1	1	0
Alanine--glyoxylate aminotransferase 2, mitochondrial OS=Rattus norvegicus GN=Agxt2 PE=1 SV=2	sp|Q64565|AGT2_RAT	cScAPDGcQAk	0.31	-0.06413	0	0	2	0
Alanine--glyoxylate aminotransferase 2, mitochondrial OS=Rattus norvegicus GN=Agxt2 PE=1 SV=2	sp|Q64565|AGT2_RAT	dEFDIVGDVR	0.1713	-0.2007	0	6	0	0
Alanine--glyoxylate aminotransferase 2, mitochondrial OS=Rattus norvegicus GN=Agxt2 PE=1 SV=2	sp|Q64565|AGT2_RAT	dMGLLVGR	0.01559	-0.03043	0	6	0	0
Alanine--glyoxylate aminotransferase 2, mitochondrial OS=Rattus norvegicus GN=Agxt2 PE=1 SV=2	sp|Q64565|AGT2_RAT	dSPVQTVR	-0.07593	-0.2258	0	1	0	0
Alanine--glyoxylate aminotransferase 2, mitochondrial OS=Rattus norvegicus GN=Agxt2 PE=1 SV=2	sp|Q64565|AGT2_RAT	eAFALVR	-0.2334	-0.005558	0	10	0	0
Alanine--glyoxylate aminotransferase 2, mitochondrial OS=Rattus norvegicus GN=Agxt2 PE=1 SV=2	sp|Q64565|AGT2_RAT	gGNFSQTFR	-0.1529	0.1745	0	10	0	0
Alanine--glyoxylate aminotransferase 2, mitochondrial OS=Rattus norvegicus GN=Agxt2 PE=1 SV=2	sp|Q64565|AGT2_RAT	gGVcIADEVQTGFGR	0.04558	0.1824	0	49	136	0
Alanine--glyoxylate aminotransferase 2, mitochondrial OS=Rattus norvegicus GN=Agxt2 PE=1 SV=2	sp|Q64565|AGT2_RAT	gIGNGFPMAAVVTTPEIASSLAk	-0.07626	0.2748	0	0	3	0
Alanine--glyoxylate aminotransferase 2, mitochondrial OS=Rattus norvegicus GN=Agxt2 PE=1 SV=2	sp|Q64565|AGT2_RAT	gLMVGIEMVQDk	0.1695	0.1883	0	12	45	4
Alanine--glyoxylate aminotransferase 2, mitochondrial OS=Rattus norvegicus GN=Agxt2 PE=1 SV=2	sp|Q64565|AGT2_RAT	hNMPPcDFSPEk	0.1827	0.07489	0	0	1	4
Alanine--glyoxylate aminotransferase 2, mitochondrial OS=Rattus norvegicus GN=Agxt2 PE=1 SV=2	sp|Q64565|AGT2_RAT	kcScAPDGcQAk	-0.218	0.1902	0	0	2	0
Alanine--glyoxylate aminotransferase 2, mitochondrial OS=Rattus norvegicus GN=Agxt2 PE=1 SV=2	sp|Q64565|AGT2_RAT	lEVDFAFEVFR	0.1887	0.3918	0	0	1	0
Alanine--glyoxylate aminotransferase 2, mitochondrial OS=Rattus norvegicus GN=Agxt2 PE=1 SV=2	sp|Q64565|AGT2_RAT	lRDEFDIVGDVR	-0.08267	0.02639	0	2	126	7
Alanine--glyoxylate aminotransferase 2, mitochondrial OS=Rattus norvegicus GN=Agxt2 PE=1 SV=2	sp|Q64565|AGT2_RAT	lSALLPEPLk	0.1125	0.165	0	0	4	0
Alanine--glyoxylate aminotransferase 2, mitochondrial OS=Rattus norvegicus GN=Agxt2 PE=1 SV=2	sp|Q64565|AGT2_RAT	nSQEVGTYMLLk	-0.02361	0.2349	0	2	16	4
Alanine--glyoxylate aminotransferase 2, mitochondrial OS=Rattus norvegicus GN=Agxt2 PE=1 SV=2	sp|Q64565|AGT2_RAT	nSQEVGTyMLLk	-0.1805	-0.1115	0	1	0	1
Alanine--glyoxylate aminotransferase 2, mitochondrial OS=Rattus norvegicus GN=Agxt2 PE=1 SV=2	sp|Q64565|AGT2_RAT	sALTQHMER	0.002507	0.09351	0	1	5	0
Alanine--glyoxylate aminotransferase 2, mitochondrial OS=Rattus norvegicus GN=Agxt2 PE=1 SV=2	sp|Q64565|AGT2_RAT	tEVNQIHEDck	0.004395	0.0798	0	0	5	1
Alanine--glyoxylate aminotransferase 2, mitochondrial OS=Rattus norvegicus GN=Agxt2 PE=1 SV=2	sp|Q64565|AGT2_RAT	tEVNQIHEDckDMGLLVGR	-0.2866	0.0544	0	1	1	4
Alanine--glyoxylate aminotransferase 2, mitochondrial OS=Rattus norvegicus GN=Agxt2 PE=1 SV=2	sp|Q64565|AGT2_RAT	vIFLVNSGSEANDLAMVMAR	0.21	0.3918	0	0	3	0
Alanine--glyoxylate aminotransferase 2, mitochondrial OS=Rattus norvegicus GN=Agxt2 PE=1 SV=2	sp|Q64565|AGT2_RAT	vPSTIAcQSTMcPDVFR	0.1192	0.0849	0	1	8	0
Alanine--glyoxylate aminotransferase 2, mitochondrial OS=Rattus norvegicus GN=Agxt2 PE=1 SV=2	sp|Q64565|AGT2_RAT	yQSLAYNHVLEIHk	-0.1063	0.1172	0	0	3	7
Alanine--glyoxylate aminotransferase 2, mitochondrial OS=Rattus norvegicus GN=Agxt2 PE=1 SV=2	sp|Q64565|AGT2_RAT	yQSLAYNHVLEIHk	0.09972	0.3127	0	0	0	1
Long-chain specific acyl-CoA dehydrogenase, mitochondrial OS=Rattus norvegicus GN=Acadl PE=1 SV=1	sp|P15650|ACADL_RAT	aFVDScLQLHETk	-0.08888	0.05823	0	5	34	28
Long-chain specific acyl-CoA dehydrogenase, mitochondrial OS=Rattus norvegicus GN=Acadl PE=1 SV=1	sp|P15650|ACADL_RAT	aFVDScLQLHETkR	-0.0135	0.1773	0	0	0	2
Long-chain specific acyl-CoA dehydrogenase, mitochondrial OS=Rattus norvegicus GN=Acadl PE=1 SV=1	sp|P15650|ACADL_RAT	aQDTAELFFEDVR	0.08091	-0.09048	0	3	0	0
Long-chain specific acyl-CoA dehydrogenase, mitochondrial OS=Rattus norvegicus GN=Acadl PE=1 SV=1	sp|P15650|ACADL_RAT	cIGAIAMTEPGAGSDLQGVR	-0.161	-0.03908	0	9	20	6
Long-chain specific acyl-CoA dehydrogenase, mitochondrial OS=Rattus norvegicus GN=Acadl PE=1 SV=1	sp|P15650|ACADL_RAT	eQIEQFIPQMTAGk	-0.1851	-0.113	0	6	35	13
Long-chain specific acyl-CoA dehydrogenase, mitochondrial OS=Rattus norvegicus GN=Acadl PE=1 SV=1	sp|P15650|ACADL_RAT	fFQEEVIPYHEEWEk	0.1798	-0.04323	0	0	14	36
Long-chain specific acyl-CoA dehydrogenase, mitochondrial OS=Rattus norvegicus GN=Acadl PE=1 SV=1	sp|P15650|ACADL_RAT	gFYYLMQELPQER	0.02789	-0.05845	0	2	10	0
Long-chain specific acyl-CoA dehydrogenase, mitochondrial OS=Rattus norvegicus GN=Acadl PE=1 SV=1	sp|P15650|ACADL_RAT	iFSSEHDIFR	0.007608	0.1085	0	2	8	0
Long-chain specific acyl-CoA dehydrogenase, mitochondrial OS=Rattus norvegicus GN=Acadl PE=1 SV=1	sp|P15650|ACADL_RAT	kFFQEEVIPYHEEWEk	0.3078	0.008501	0	0	4	7
Long-chain specific acyl-CoA dehydrogenase, mitochondrial OS=Rattus norvegicus GN=Acadl PE=1 SV=1	sp|P15650|ACADL_RAT	kLTDIGIR	-0.1253	-0.1043	0	2	10	1
Long-chain specific acyl-CoA dehydrogenase, mitochondrial OS=Rattus norvegicus GN=Acadl PE=1 SV=1	sp|P15650|ACADL_RAT	lDSASASMAk	0.09285	-0.08846	0	0	16	5
Long-chain specific acyl-CoA dehydrogenase, mitochondrial OS=Rattus norvegicus GN=Acadl PE=1 SV=1	sp|P15650|ACADL_RAT	lETPSAk	-0.1076	-0.07597	0	9	2	0
Long-chain specific acyl-CoA dehydrogenase, mitochondrial OS=Rattus norvegicus GN=Acadl PE=1 SV=1	sp|P15650|ACADL_RAT	lLIADLAISAcEFMFEETR	0.06999	0.08632	0	1	7	0
Long-chain specific acyl-CoA dehydrogenase, mitochondrial OS=Rattus norvegicus GN=Acadl PE=1 SV=1	sp|P15650|ACADL_RAT	lPASALLGEENk	-0.1134	0.1557	0	1	28	1
Long-chain specific acyl-CoA dehydrogenase, mitochondrial OS=Rattus norvegicus GN=Acadl PE=1 SV=1	sp|P15650|ACADL_RAT	lTDIGIR	-0.1388	-0.3148	0	6	0	0
Long-chain specific acyl-CoA dehydrogenase, mitochondrial OS=Rattus norvegicus GN=Acadl PE=1 SV=1	sp|P15650|ACADL_RAT	qGLLGINIAEk	-0.237	-0.08361	0	7	6	3
Long-chain specific acyl-CoA dehydrogenase, mitochondrial OS=Rattus norvegicus GN=Acadl PE=1 SV=1	sp|P15650|ACADL_RAT	rLDSASASMAk	0.1124	-0.009834	0	1	6	3
Long-chain specific acyl-CoA dehydrogenase, mitochondrial OS=Rattus norvegicus GN=Acadl PE=1 SV=1	sp|P15650|ACADL_RAT	sGSDWILNGSk	0.1849	0.01964	0	18	39	5
Long-chain specific acyl-CoA dehydrogenase, mitochondrial OS=Rattus norvegicus GN=Acadl PE=1 SV=1	sp|P15650|ACADL_RAT	tNIcVTR	-0.2194	-0.05613	0	8	1	0
Long-chain specific acyl-CoA dehydrogenase, mitochondrial OS=Rattus norvegicus GN=Acadl PE=1 SV=1	sp|P15650|ACADL_RAT	tVAHIQTVQHk	-0.08651	-0.03564	0	1	1	6
Long-chain specific acyl-CoA dehydrogenase, mitochondrial OS=Rattus norvegicus GN=Acadl PE=1 SV=1	sp|P15650|ACADL_RAT	vQPIYGGTNEIMk	0.09003	-0.04643	0	7	22	8
Adenosylhomocysteinase OS=Rattus norvegicus GN=Ahcy PE=1 SV=3	sp|P10760|SAHH_RAT	aGIPVFAWk	-0.07688	0.2335	0	5	0	0
Adenosylhomocysteinase OS=Rattus norvegicus GN=Ahcy PE=1 SV=3	sp|P10760|SAHH_RAT	aLDIAENEMPGLMR	0.1812	0.2862	0	5	23	0
Adenosylhomocysteinase OS=Rattus norvegicus GN=Ahcy PE=1 SV=3	sp|P10760|SAHH_RAT	aTDVMIAGk	-0.0008949	0.238	0	2	22	7
Adenosylhomocysteinase OS=Rattus norvegicus GN=Ahcy PE=1 SV=3	sp|P10760|SAHH_RAT	dDAIVcNIGHFDVEIDVk	0.2722	-0.05733	0	1	0	19
Adenosylhomocysteinase OS=Rattus norvegicus GN=Ahcy PE=1 SV=3	sp|P10760|SAHH_RAT	dGPLNMILDDGGDLTNLIHTk	0.1688	0.4087	0	0	10	36
Adenosylhomocysteinase OS=Rattus norvegicus GN=Ahcy PE=1 SV=3	sp|P10760|SAHH_RAT	eGNIFVTTTGcVDIILGR	0.2238	0.2467	0	0	19	0
Adenosylhomocysteinase OS=Rattus norvegicus GN=Ahcy PE=1 SV=3	sp|P10760|SAHH_RAT	eMYSASkPLk	0.1539	0.2835	0	0	3	10
Adenosylhomocysteinase OS=Rattus norvegicus GN=Ahcy PE=1 SV=3	sp|P10760|SAHH_RAT	eSLIDGIk	0.1823	0.2753	0	7	14	0
Adenosylhomocysteinase OS=Rattus norvegicus GN=Ahcy PE=1 SV=3	sp|P10760|SAHH_RAT	eSLIDGIkR	-0.1624	0.3	0	0	3	0
Adenosylhomocysteinase OS=Rattus norvegicus GN=Ahcy PE=1 SV=3	sp|P10760|SAHH_RAT	fDNLYGcR	0.1406	0.1858	0	11	1	0
Adenosylhomocysteinase OS=Rattus norvegicus GN=Ahcy PE=1 SV=3	sp|P10760|SAHH_RAT	gcAQALR	-0.1317	0.06697	0	1	0	0
Adenosylhomocysteinase OS=Rattus norvegicus GN=Ahcy PE=1 SV=3	sp|P10760|SAHH_RAT	gETDEEYLWcIEQTLHFk	0.4864	0.2736	0	0	7	47
Adenosylhomocysteinase OS=Rattus norvegicus GN=Ahcy PE=1 SV=3	sp|P10760|SAHH_RAT	gISEETTTGVHNLYk	0.1535	0.1574	0	1	11	12
Adenosylhomocysteinase OS=Rattus norvegicus GN=Ahcy PE=1 SV=3	sp|P10760|SAHH_RAT	gISEETTTGVHNLyk	0.1973	0.06113	0	0	2	3
Adenosylhomocysteinase OS=Rattus norvegicus GN=Ahcy PE=1 SV=3	sp|P10760|SAHH_RAT	hPQLLSGIR	-0.1742	-0.05198	0	0	4	0
Adenosylhomocysteinase OS=Rattus norvegicus GN=Ahcy PE=1 SV=3	sp|P10760|SAHH_RAT	iAGcLHMTVETAVLIETLVALGAEVR	0.2388	0.1565	0	0	0	1
Adenosylhomocysteinase OS=Rattus norvegicus GN=Ahcy PE=1 SV=3	sp|P10760|SAHH_RAT	iILLAEGR	-0.05444	0.2617	0	10	0	0
Adenosylhomocysteinase OS=Rattus norvegicus GN=Ahcy PE=1 SV=3	sp|P10760|SAHH_RAT	kALDIAENEMPGLMR	-0.4435	0.05817	0	1	2	2
Adenosylhomocysteinase OS=Rattus norvegicus GN=Ahcy PE=1 SV=3	sp|P10760|SAHH_RAT	kLDEAVAEAHLGk	0.02036	0.3087	0	0	14	19
Adenosylhomocysteinase OS=Rattus norvegicus GN=Ahcy PE=1 SV=3	sp|P10760|SAHH_RAT	mMANGILk	-0.1078	0.1308	0	5	3	0
Adenosylhomocysteinase OS=Rattus norvegicus GN=Ahcy PE=1 SV=3	sp|P10760|SAHH_RAT	qAQYLGMPINGPFkPDHYR	0.2952	0.04774	0	0	1	9
Adenosylhomocysteinase OS=Rattus norvegicus GN=Ahcy PE=1 SV=3	sp|P10760|SAHH_RAT	rATDVMIAGk	-0.0715	0.4216	0	0	1	0
Adenosylhomocysteinase OS=Rattus norvegicus GN=Ahcy PE=1 SV=3	sp|P10760|SAHH_RAT	skFDNLYGcR	0.06834	0.1523	0	0	5	0
Adenosylhomocysteinase OS=Rattus norvegicus GN=Ahcy PE=1 SV=3	sp|P10760|SAHH_RAT	vADIGLAAWGR	0.02143	0.1975	0	10	0	0
Adenosylhomocysteinase OS=Rattus norvegicus GN=Ahcy PE=1 SV=3	sp|P10760|SAHH_RAT	vAVVAGYGDVGk	0.04274	0.2717	0	12	36	6
Adenosylhomocysteinase OS=Rattus norvegicus GN=Ahcy PE=1 SV=3	sp|P10760|SAHH_RAT	vNIkPQVDR	-0.1102	0.1688	0	0	1	0
Adenosylhomocysteinase OS=Rattus norvegicus GN=Ahcy PE=1 SV=3	sp|P10760|SAHH_RAT	vPAINVNDSVTk	0.007709	0.2059	0	1	5	1
Adenosylhomocysteinase OS=Rattus norvegicus GN=Ahcy PE=1 SV=3	sp|P10760|SAHH_RAT	wLNENAVEk	-0.01898	0.2076	0	1	6	1
Adenosylhomocysteinase OS=Rattus norvegicus GN=Ahcy PE=1 SV=3	sp|P10760|SAHH_RAT	yPVGVHFLPk	0.001657	0.277	0	0	1	0
Trifunctional enzyme subunit alpha, mitochondrial OS=Rattus norvegicus GN=Hadha PE=1 SV=2	sp|Q64428|ECHA_RAT	aDMVIEAVFEDLAVk	0.1793	-0.223	0	0	16	5
Trifunctional enzyme subunit alpha, mitochondrial OS=Rattus norvegicus GN=Hadha PE=1 SV=2	sp|Q64428|ECHA_RAT	aLMGLYNGQVLck	-0.1258	-0.2231	0	1	4	0
Trifunctional enzyme subunit alpha, mitochondrial OS=Rattus norvegicus GN=Hadha PE=1 SV=2	sp|Q64428|ECHA_RAT	aLTSFER	-0.1343	-0.266	0	9	0	0
Trifunctional enzyme subunit alpha, mitochondrial OS=Rattus norvegicus GN=Hadha PE=1 SV=2	sp|Q64428|ECHA_RAT	cLAPMMSEVIR	-0.2063	0.1635	0	2	0	0
Trifunctional enzyme subunit alpha, mitochondrial OS=Rattus norvegicus GN=Hadha PE=1 SV=2	sp|Q64428|ECHA_RAT	dGPGFYTTR	-0.1095	-0.2823	0	8	0	0
Trifunctional enzyme subunit alpha, mitochondrial OS=Rattus norvegicus GN=Hadha PE=1 SV=2	sp|Q64428|ECHA_RAT	dLANNSSk	0.01756	-0.1128	0	0	1	0
Trifunctional enzyme subunit alpha, mitochondrial OS=Rattus norvegicus GN=Hadha PE=1 SV=2	sp|Q64428|ECHA_RAT	dSIFSNLIGQLDYk	0.05137	-0.06824	0	0	6	2
Trifunctional enzyme subunit alpha, mitochondrial OS=Rattus norvegicus GN=Hadha PE=1 SV=2	sp|Q64428|ECHA_RAT	dTTASAVAVGLk	-0.07709	-0.2484	0	8	24	3
Trifunctional enzyme subunit alpha, mitochondrial OS=Rattus norvegicus GN=Hadha PE=1 SV=2	sp|Q64428|ECHA_RAT	dTTVTGLGR	-0.2198	-0.6777	0	2	0	0
[truncated: 33,766 more rows]
[truncated: 1 more columns]
