# Supplementary material for: Proteomic Analysis of Liver Proteins in a Rat Model of Chronic Restraint Stress-Induced Depression
Source: Biomed Res Int. 2017 Feb 15;2017:7508316. doi: 10.1155/2017/7508316 (PMC5331273; doi:10.1155/2017/7508316)
Supplement: Supplementary file 1 — A total of peptides and protein clusters of liver in depression rats due to chronic restraint stress were provided separately in Supplementary Table 1 and Table 2 and available online at . [file 7508316.f1.zip › supp/Supplementary Table 2 Total proteins of Liver from Rats Exposed to Chronic Restraint Stress.xlsx]

## Sheet: Supplementary Table 2protein
Proteomic Analysis of Liver Proteins in A Rat Model of Chronic Restraint Stress-Induced Depression
Cong Li,1 Zhengguang Guo,2 Ronghua Zhao,1 Wei Sun,2 Ming Xie1
Running title: Liver Proteomics of Depression Rats
1Beijing University of Chinese Medicine, Bei San Huan Dong Lu 11, Chao Yang District, Beijing 100029, China
2 Institute of Basic Medical Sciences, Academy of Medical Science, Peking Union Medical College, Dong Dan San Tiao, Dong Cheng District, Beijing 100005, China
Correspondence should be addressed to Ming Xie; xieming603@263.net
Supplementary Table 2: total proteins in the livers of Control and depression rats due to CRS.
Protein Name	Accession Number	Molecular Weight	Control	CRS
Cluster of Glycogen phosphorylase, liver form OS=Rattus norvegicus GN=Pygl PE=1 SV=5 (sp|P09811|PYGL_RAT)	sp|P09811|PYGL_RAT [3]	97 kDa	1	1.1
Cluster of Murinoglobulin-1 OS=Rattus norvegicus GN=Mug1 PE=2 SV=1 (sp|Q03626|MUG1_RAT)	sp|Q03626|MUG1_RAT [4]	165 kDa	1	1.1
Cluster of Cytochrome P450 2D10 OS=Rattus norvegicus GN=Cyp2d10 PE=2 SV=1 (sp|P12939|CP2DA_RAT)	sp|P12939|CP2DA_RAT [2]	57 kDa	1	1.1
Alpha-1-macroglobulin OS=Rattus norvegicus GN=A1m PE=1 SV=1	sp|Q63041|A1M_RAT	167 kDa	1	1
Cluster of UDP-glucuronosyltransferase 2B17 OS=Rattus norvegicus GN=Ugt2b17 PE=2 SV=2 (sp|P08542|UDB17_RAT)	sp|P08542|UDB17_RAT [2]	61 kDa	1	1
Cluster of Histone H2B type 1 OS=Rattus norvegicus PE=1 SV=2 (sp|Q00715|H2B1_RAT)	sp|Q00715|H2B1_RAT [2]	14 kDa	1	0.9
Short-chain specific acyl-CoA dehydrogenase, mitochondrial OS=Rattus norvegicus GN=Acads PE=1 SV=2	sp|P15651|ACADS_RAT	45 kDa	1	1
Cluster of Estrogen sulfotransferase, isoform 1 OS=Rattus norvegicus GN=Sult1e1 PE=2 SV=1 (sp|P52844|ST1E1_RAT)	sp|P52844|ST1E1_RAT [3]	36 kDa	1	1
Cytochrome b-c1 complex subunit 2, mitochondrial OS=Rattus norvegicus GN=Uqcrc2 PE=1 SV=2	sp|P32551|QCR2_RAT	48 kDa	1	0.8
Epoxide hydrolase 1 OS=Rattus norvegicus GN=Ephx1 PE=1 SV=1	sp|P07687|HYEP_RAT	53 kDa	1	0.9
3-oxo-5-beta-steroid 4-dehydrogenase OS=Rattus norvegicus GN=Akr1d1 PE=1 SV=1	sp|P31210|AK1D1_RAT	37 kDa	1	1
Cytochrome b5 OS=Rattus norvegicus GN=Cyb5a PE=1 SV=2	sp|P00173|CYB5_RAT	15 kDa	1	0.9
T-complex protein 1 subunit gamma OS=Rattus norvegicus GN=Cct3 PE=1 SV=1	sp|Q6P502|TCPG_RAT	61 kDa	1	1.3
Cluster of Glutathione S-transferase alpha-1 OS=Rattus norvegicus GN=Gsta1 PE=1 SV=3 (sp|P00502|GSTA1_RAT)	sp|P00502|GSTA1_RAT [2]	26 kDa	1	1.1
Hemopexin OS=Rattus norvegicus GN=Hpx PE=1 SV=3	sp|P20059|HEMO_RAT	51 kDa	1	1.2
Phosphoglucomutase-1 OS=Rattus norvegicus GN=Pgm1 PE=1 SV=2	sp|P38652|PGM1_RAT	61 kDa	1	1.1
Propionyl-CoA carboxylase beta chain, mitochondrial OS=Rattus norvegicus GN=Pccb PE=2 SV=1	sp|P07633|PCCB_RAT	59 kDa	1	1
Mitochondrial inner membrane protein (Fragment) OS=Rattus norvegicus GN=Immt PE=1 SV=1	sp|Q3KR86|IMMT_RAT	67 kDa	1	0.8
Cytochrome P450 2C23 OS=Rattus norvegicus GN=Cyp2c23 PE=2 SV=2	sp|P24470|CP2CN_RAT	56 kDa	1	1.1
L-gulonolactone oxidase OS=Rattus norvegicus GN=Gulo PE=1 SV=3	sp|P10867|GGLO_RAT	51 kDa	1	0.8
Guanine nucleotide-binding protein subunit beta-2-like 1 OS=Rattus norvegicus GN=Gnb2l1 PE=1 SV=3	sp|P63245|GBLP_RAT	35 kDa	1	1.2
Cluster of Cytochrome P450 3A2 OS=Rattus norvegicus GN=Cyp3a2 PE=1 SV=2 (sp|P05183|CP3A2_RAT)	sp|P05183|CP3A2_RAT [2]	58 kDa	1	1.2
Cluster of 3-ketoacyl-CoA thiolase A, peroxisomal OS=Rattus norvegicus GN=Acaa1a PE=2 SV=2 (sp|P21775|THIKA_RAT)	sp|P21775|THIKA_RAT [2]	44 kDa	1	0.8
2-oxoisovalerate dehydrogenase subunit alpha, mitochondrial (Fragment) OS=Rattus norvegicus GN=Bckdha PE=1 SV=1	sp|P11960|ODBA_RAT	50 kDa	1	1
Succinate dehydrogenase [ubiquinone] iron-sulfur subunit, mitochondrial OS=Rattus norvegicus GN=Sdhb PE=2 SV=2	sp|P21913|DHSB_RAT	32 kDa	1	0.9
Glycine N-acyltransferase OS=Rattus norvegicus GN=Glyat PE=2 SV=1	sp|Q5PQT3|GLYAT_RAT	34 kDa	1	1
Glutamine synthetase OS=Rattus norvegicus GN=Glul PE=1 SV=3	sp|P09606|GLNA_RAT	42 kDa	1	1.2
Cytochrome b-c1 complex subunit 1, mitochondrial OS=Rattus norvegicus GN=Uqcrc1 PE=1 SV=1	sp|Q68FY0|QCR1_RAT	53 kDa	1	0.8
Cluster of Histone H3.1 OS=Rattus norvegicus PE=1 SV=3 (sp|Q6LED0|H31_RAT)	sp|Q6LED0|H31_RAT [2]	15 kDa	1	1.2
Cluster of Nucleoside diphosphate kinase B OS=Rattus norvegicus GN=Nme2 PE=1 SV=1 (sp|P19804|NDKB_RAT)	sp|P19804|NDKB_RAT [2]	17 kDa	1	1.1
2-hydroxyacyl-CoA lyase 1 OS=Rattus norvegicus GN=Hacl1 PE=1 SV=1	sp|Q8CHM7|HACL1_RAT	64 kDa	1	1.1
Enoyl-CoA delta isomerase 1, mitochondrial OS=Rattus norvegicus GN=Eci1 PE=1 SV=1	sp|P23965|ECI1_RAT	32 kDa	1	1
Peptidyl-prolyl cis-trans isomerase B OS=Rattus norvegicus GN=Ppib PE=2 SV=3	sp|P24368|PPIB_RAT	24 kDa	1	0.9
Histidine ammonia-lyase OS=Rattus norvegicus GN=Hal PE=1 SV=1	sp|P21213|HUTH_RAT	72 kDa	1	1.1
60S ribosomal protein L13a OS=Rattus norvegicus GN=Rpl13a PE=1 SV=2	sp|P35427|RL13A_RAT	23 kDa	1	1
Acyl-CoA dehydrogenase family member 11 OS=Rattus norvegicus GN=Acad11 PE=1 SV=1	sp|B3DMA2|ACD11_RAT	87 kDa	1	1
Cluster of Acyl-coenzyme A thioesterase 2, mitochondrial OS=Rattus norvegicus GN=Acot2 PE=1 SV=1 (sp|O55171|ACOT2_RAT)	sp|O55171|ACOT2_RAT [2]	50 kDa	1	1
3-hydroxyisobutyryl-CoA hydrolase, mitochondrial OS=Rattus norvegicus GN=Hibch PE=1 SV=2	sp|Q5XIE6|HIBCH_RAT	43 kDa	1	1.1
Triosephosphate isomerase OS=Rattus norvegicus GN=Tpi1 PE=1 SV=2	sp|P48500|TPIS_RAT	27 kDa	1	1
Pyruvate dehydrogenase E1 component subunit beta, mitochondrial OS=Rattus norvegicus GN=Pdhb PE=1 SV=2	sp|P49432|ODPB_RAT	39 kDa	1	1
Succinyl-CoA ligase [ADP/GDP-forming] subunit alpha, mitochondrial OS=Rattus norvegicus GN=Suclg1 PE=2 SV=2	sp|P13086|SUCA_RAT	36 kDa	1	1.1
60S ribosomal protein L4 OS=Rattus norvegicus GN=Rpl4 PE=1 SV=3	sp|P50878|RL4_RAT	47 kDa	1	1.4
Cluster of AP-1 complex subunit beta-1 OS=Rattus norvegicus GN=Ap1b1 PE=1 SV=1 (sp|P52303|AP1B1_RAT)	sp|P52303|AP1B1_RAT [2]	105 kDa	1	0.9
LETM1 and EF-hand domain-containing protein 1, mitochondrial OS=Rattus norvegicus GN=Letm1 PE=1 SV=1	sp|Q5XIN6|LETM1_RAT	83 kDa	1	0.8
Hydroxymethylglutaryl-CoA lyase, mitochondrial OS=Rattus norvegicus GN=Hmgcl PE=2 SV=1	sp|P97519|HMGCL_RAT	34 kDa	1	1.2
Aspartate aminotransferase, cytoplasmic OS=Rattus norvegicus GN=Got1 PE=1 SV=3	sp|P13221|AATC_RAT	46 kDa	1	1.2
Rab GDP dissociation inhibitor beta OS=Rattus norvegicus GN=Gdi2 PE=1 SV=2	sp|P50399|GDIB_RAT	51 kDa	1	0.9
Fibronectin OS=Rattus norvegicus GN=Fn1 PE=1 SV=2	sp|P04937|FINC_RAT	273 kDa	1	1
40S ribosomal protein SA OS=Rattus norvegicus GN=Rpsa PE=1 SV=3	sp|P38983|RSSA_RAT	33 kDa	1	0.8
Dynamin-like 120 kDa protein, mitochondrial OS=Rattus norvegicus GN=Opa1 PE=1 SV=1	sp|Q2TA68|OPA1_RAT	111 kDa	1	0.9
ATPase family AAA domain-containing protein 3 OS=Rattus norvegicus GN=Atad3 PE=1 SV=1	sp|Q3KRE0|ATAD3_RAT	67 kDa	1	0.9
Cluster of Histone H1.4 OS=Rattus norvegicus GN=Hist1h1e PE=1 SV=3 (sp|P15865|H14_RAT)	sp|P15865|H14_RAT [3]	22 kDa	1	2
ATP-binding cassette sub-family D member 3 OS=Rattus norvegicus GN=Abcd3 PE=1 SV=3	sp|P16970|ABCD3_RAT	75 kDa	1	0.8
Plasminogen OS=Rattus norvegicus GN=Plg PE=2 SV=2	sp|Q01177|PLMN_RAT	91 kDa	1	0.9
Short/branched chain specific acyl-CoA dehydrogenase, mitochondrial OS=Rattus norvegicus GN=Acadsb PE=1 SV=1	sp|P70584|ACDSB_RAT	48 kDa	1	1.1
Cluster of UDP-glucuronosyltransferase 1-1 OS=Rattus norvegicus GN=Ugt1a1 PE=1 SV=1 (sp|Q64550|UD11_RAT)	sp|Q64550|UD11_RAT [6]	60 kDa	1	1.1
Stress-induced-phosphoprotein 1 OS=Rattus norvegicus GN=Stip1 PE=1 SV=1	sp|O35814|STIP1_RAT	63 kDa	1	1
Hydroxyacylglutathione hydrolase, mitochondrial OS=Rattus norvegicus GN=Hagh PE=1 SV=2	sp|O35952|GLO2_RAT	34 kDa	1	1
Kynurenine 3-monooxygenase OS=Rattus norvegicus GN=Kmo PE=1 SV=1	sp|O88867|KMO_RAT	54 kDa	1	1
6-phosphogluconate dehydrogenase, decarboxylating OS=Rattus norvegicus GN=Pgd PE=1 SV=1	sp|P85968|6PGD_RAT	53 kDa	1	1.1
Fibrinogen alpha chain OS=Rattus norvegicus GN=Fga PE=1 SV=3	sp|P06399|FIBA_RAT	87 kDa	1	1
Serum paraoxonase/lactonase 3 OS=Rattus norvegicus GN=Pon3 PE=2 SV=1	sp|Q68FP2|PON3_RAT	39 kDa	1	0.9
Cytochrome c oxidase subunit 5B, mitochondrial OS=Rattus norvegicus GN=Cox5b PE=1 SV=2	sp|P12075|COX5B_RAT	14 kDa	1	0.9
Alpha-1-antiproteinase OS=Rattus norvegicus GN=Serpina1 PE=1 SV=2	sp|P17475|A1AT_RAT	46 kDa	1	1
GrpE protein homolog 1, mitochondrial OS=Rattus norvegicus GN=Grpel1 PE=1 SV=2	sp|P97576|GRPE1_RAT	24 kDa	1	0.9
Fatty-acid amide hydrolase 1 OS=Rattus norvegicus GN=Faah PE=1 SV=1	sp|P97612|FAAH1_RAT	63 kDa	1	0.9
Methyltransferase-like protein 7B OS=Rattus norvegicus GN=Mettl7b PE=1 SV=1	sp|Q562C4|MET7B_RAT	28 kDa	1	0.8
Protein NDRG2 OS=Rattus norvegicus GN=Ndrg2 PE=1 SV=1	sp|Q8VBU2|NDRG2_RAT	41 kDa	1	1
Actin-related protein 3 OS=Rattus norvegicus GN=Actr3 PE=1 SV=1	sp|Q4V7C7|ARP3_RAT	47 kDa	1	1
Proteasome activator complex subunit 1 OS=Rattus norvegicus GN=Psme1 PE=2 SV=1	sp|Q63797|PSME1_RAT	29 kDa	1	1.2
Cluster of UDP-glucuronosyltransferase 2B1 OS=Rattus norvegicus GN=Ugt2b1 PE=2 SV=1 (sp|P09875|UD2B1_RAT)	sp|P09875|UD2B1_RAT	60 kDa	1	0.9
60S ribosomal protein L12 OS=Rattus norvegicus GN=Rpl12 PE=2 SV=1	sp|P23358|RL12_RAT	18 kDa	1	1.1
Adipocyte plasma membrane-associated protein OS=Rattus norvegicus GN=Apmap PE=2 SV=2	sp|Q7TP48|APMAP_RAT	42 kDa	1	1
Phosphatidylethanolamine-binding protein 1 OS=Rattus norvegicus GN=Pebp1 PE=1 SV=3	sp|P31044|PEBP1_RAT	21 kDa	1	1
Cluster of Liver carboxylesterase 4 OS=Rattus norvegicus PE=2 SV=2 (sp|Q64573|EST4_RAT)	sp|Q64573|EST4_RAT [2]	62 kDa	1	0.9
Dimethylaniline monooxygenase [N-oxide-forming] 5 OS=Rattus norvegicus GN=Fmo5 PE=1 SV=3	sp|Q8K4C0|FMO5_RAT	60 kDa	1	1.6
40S ribosomal protein S2 OS=Rattus norvegicus GN=Rps2 PE=1 SV=1	sp|P27952|RS2_RAT	31 kDa	1	1.2
Glutaminase liver isoform, mitochondrial OS=Rattus norvegicus GN=Gls2 PE=2 SV=3	sp|P28492|GLSL_RAT	66 kDa	1	1.1
Cystathionine beta-synthase OS=Rattus norvegicus GN=Cbs PE=1 SV=3	sp|P32232|CBS_RAT	61 kDa	1	1.3
Cluster of Cytochrome P450 4F1 OS=Rattus norvegicus GN=Cyp4f1 PE=2 SV=1 (sp|P33274|CP4F1_RAT)	sp|P33274|CP4F1_RAT [4]	60 kDa	1	1.1
Coproporphyrinogen-III oxidase, mitochondrial OS=Rattus norvegicus GN=Cpox PE=2 SV=1	sp|Q3B7D0|HEM6_RAT	49 kDa	1	0.9
26S proteasome non-ATPase regulatory subunit 11 OS=Rattus norvegicus GN=Psmd11 PE=3 SV=2	sp|F1LMZ8|PSD11_RAT	47 kDa	1	1.1
Chaperone activity of bc1 complex-like, mitochondrial OS=Rattus norvegicus GN=Adck3 PE=2 SV=1	sp|Q5BJQ0|ADCK3_RAT	72 kDa	1	1.1
Asialoglycoprotein receptor 1 OS=Rattus norvegicus GN=Asgr1 PE=1 SV=2	sp|P02706|ASGR1_RAT	33 kDa	1	0.9
Eukaryotic translation initiation factor 3 subunit A OS=Rattus norvegicus GN=Eif3a PE=2 SV=2	sp|Q1JU68|EIF3A_RAT	163 kDa	1	1.1
Programmed cell death 6-interacting protein OS=Rattus norvegicus GN=Pdcd6ip PE=1 SV=2	sp|Q9QZA2|PDC6I_RAT	97 kDa	1	1.1
Glutathione S-transferase kappa 1 OS=Rattus norvegicus GN=Gstk1 PE=1 SV=3	sp|P24473|GSTK1_RAT	25 kDa	1	1.1
40S ribosomal protein S13 OS=Rattus norvegicus GN=Rps13 PE=2 SV=2	sp|P62278|RS13_RAT	17 kDa	1	1
Cytochrome P450 3A18 OS=Rattus norvegicus GN=Cyp3a18 PE=2 SV=1	sp|Q64581|CP3AI_RAT	57 kDa	1	0.9
Apolipoprotein A-I OS=Rattus norvegicus GN=Apoa1 PE=1 SV=2	sp|P04639|APOA1_RAT	30 kDa	1	0.9
Haptoglobin OS=Rattus norvegicus GN=Hp PE=1 SV=3	sp|P06866|HPT_RAT	39 kDa	1	1
Dihydrolipoyllysine-residue acetyltransferase component of pyruvate dehydrogenase complex, mitochondrial OS=Rattus norvegicus GN=Dlat PE=1 SV=3	sp|P08461|ODP2_RAT	67 kDa	1	1
Protein transport protein Sec31A OS=Rattus norvegicus GN=Sec31a PE=1 SV=2	sp|Q9Z2Q1|SC31A_RAT	135 kDa	1	1.1
Heat shock 70 kDa protein 4 OS=Rattus norvegicus GN=Hspa4 PE=1 SV=1	sp|O88600|HSP74_RAT	94 kDa	1	1.1
60S ribosomal protein L7a OS=Rattus norvegicus GN=Rpl7a PE=1 SV=2	sp|P62425|RL7A_RAT	30 kDa	1	1.5
Cytochrome c oxidase subunit 5A, mitochondrial OS=Rattus norvegicus GN=Cox5a PE=1 SV=1	sp|P11240|COX5A_RAT	16 kDa	1	0.8
Thioredoxin reductase 2, mitochondrial OS=Rattus norvegicus GN=Txnrd2 PE=1 SV=3	sp|Q9Z0J5|TRXR2_RAT	57 kDa	1	1.1
Dihydropyrimidine dehydrogenase [NADP(+)] OS=Rattus norvegicus GN=Dpyd PE=2 SV=1	sp|O89000|DPYD_RAT	111 kDa	1	1.2
40S ribosomal protein S19 OS=Rattus norvegicus GN=Rps19 PE=2 SV=3	sp|P17074|RS19_RAT	16 kDa	1	1.2
Pterin-4-alpha-carbinolamine dehydratase OS=Rattus norvegicus GN=Pcbd1 PE=1 SV=2	sp|P61459|PHS_RAT	12 kDa	1	1.1
ATP synthase-coupling factor 6, mitochondrial OS=Rattus norvegicus GN=Atp5j PE=1 SV=1	sp|P21571|ATP5J_RAT	12 kDa	1	0.9
Arylacetamide deacetylase OS=Rattus norvegicus GN=Aadac PE=2 SV=3	sp|Q9QZH8|AAAD_RAT	46 kDa	1	0.9
Sulfotransferase 1A1 OS=Rattus norvegicus GN=Sult1a1 PE=1 SV=1	sp|P17988|ST1A1_RAT	34 kDa	1	1.3
40S ribosomal protein S9 OS=Rattus norvegicus GN=Rps9 PE=1 SV=4	sp|P29314|RS9_RAT	23 kDa	1	1.2
Enoyl-CoA hydratase domain-containing protein 3, mitochondrial OS=Rattus norvegicus GN=Echdc3 PE=2 SV=1	sp|Q3MIE0|ECHD3_RAT	32 kDa	1	1
Stomatin-like protein 2 OS=Rattus norvegicus GN=Stoml2 PE=1 SV=1	sp|Q4FZT0|STML2_RAT	38 kDa	1	0.9
Cluster of Cytochrome P450 4A14 OS=Rattus norvegicus GN=Cyp4a14 PE=1 SV=2 (sp|P20817|CP4AE_RAT)	sp|P20817|CP4AE_RAT [3]	58 kDa	1	1
Sulfated glycoprotein 1 OS=Rattus norvegicus GN=Psap PE=1 SV=1	sp|P10960|SAP_RAT	61 kDa	1	1
Tyrosine--tRNA ligase, cytoplasmic OS=Rattus norvegicus GN=Yars PE=2 SV=3	sp|Q4KM49|SYYC_RAT	59 kDa	1	1.1
GTP:AMP phosphotransferase, mitochondrial OS=Rattus norvegicus GN=Ak3 PE=2 SV=2	sp|P29411|KAD3_RAT	25 kDa	1	1.1
General vesicular transport factor p115 OS=Rattus norvegicus GN=Uso1 PE=1 SV=1	sp|P41542|USO1_RAT	107 kDa	1	1.1
40S ribosomal protein S8 OS=Rattus norvegicus GN=Rps8 PE=1 SV=2	sp|P62243|RS8_RAT	24 kDa	1	1.2
Aflatoxin B1 aldehyde reductase member 2 OS=Rattus norvegicus GN=Akr7a2 PE=1 SV=2	sp|Q8CG45|ARK72_RAT	41 kDa	1	1.1
Malonyl-CoA decarboxylase, mitochondrial OS=Rattus norvegicus GN=Mlycd PE=2 SV=1	sp|Q920F5|DCMC_RAT	55 kDa	1	1.1
Alpha-soluble NSF attachment protein OS=Rattus norvegicus GN=Napa PE=1 SV=2	sp|P54921|SNAA_RAT	33 kDa	1	0.9
Tripeptidyl-peptidase 2 OS=Rattus norvegicus GN=Tpp2 PE=2 SV=3	sp|Q64560|TPP2_RAT	138 kDa	1	0.9
Ferritin light chain 1 OS=Rattus norvegicus GN=Ftl1 PE=1 SV=3	sp|P02793|FRIL1_RAT	21 kDa	1	1.4
AP-2 complex subunit alpha-2 OS=Rattus norvegicus GN=Ap2a2 PE=1 SV=3	sp|P18484|AP2A2_RAT	104 kDa	1	1.1
Aspartate--tRNA ligase, cytoplasmic OS=Rattus norvegicus GN=Dars PE=2 SV=1	sp|P15178|SYDC_RAT	57 kDa	1	0.9
Glutathione synthetase OS=Rattus norvegicus GN=Gss PE=1 SV=1	sp|P46413|GSHB_RAT	52 kDa	1	1
Enoyl-CoA delta isomerase 2, mitochondrial OS=Rattus norvegicus GN=Eci2 PE=1 SV=1	sp|Q5XIC0|ECI2_RAT	43 kDa	1	1.2
Glycerol kinase OS=Rattus norvegicus GN=Gk PE=2 SV=1	sp|Q63060|GLPK_RAT	57 kDa	1	1
Heat shock protein 105 kDa OS=Rattus norvegicus GN=Hsph1 PE=1 SV=1	sp|Q66HA8|HS105_RAT	96 kDa	1	1
All-trans-retinol 13,14-reductase OS=Rattus norvegicus GN=Retsat PE=2 SV=1	sp|Q8VHE9|RETST_RAT	68 kDa	1	0.8
DnaJ homolog subfamily A member 2 OS=Rattus norvegicus GN=Dnaja2 PE=2 SV=1	sp|O35824|DNJA2_RAT	46 kDa	1	0.9
UDP-glucose 6-dehydrogenase OS=Rattus norvegicus GN=Ugdh PE=1 SV=1	sp|O70199|UGDH_RAT	55 kDa	1	1.2
Guanine deaminase OS=Rattus norvegicus GN=Gda PE=1 SV=1	sp|Q9WTT6|GUAD_RAT	51 kDa	1	1.1
Thioredoxin-dependent peroxide reductase, mitochondrial OS=Rattus norvegicus GN=Prdx3 PE=1 SV=2	sp|Q9Z0V6|PRDX3_RAT	28 kDa	1	1.1
60S ribosomal protein L30 OS=Rattus norvegicus GN=Rpl30 PE=3 SV=2	sp|P62890|RL30_RAT	13 kDa	1	1
APOBEC1 complementation factor OS=Rattus norvegicus GN=A1cf PE=1 SV=1	sp|Q923K9|A1CF_RAT	66 kDa	1	1.2
40S ribosomal protein S16 OS=Rattus norvegicus GN=Rps16 PE=1 SV=2	sp|P62250|RS16_RAT	16 kDa	1	1.2
Cluster of Cytochrome P450 1A2 OS=Rattus norvegicus GN=Cyp1a2 PE=1 SV=2 (sp|P04799|CP1A2_RAT)	sp|P04799|CP1A2_RAT [2]	58 kDa	1	1.2
Glucose-6-phosphate 1-dehydrogenase OS=Rattus norvegicus GN=G6pdx PE=1 SV=3	sp|P05370|G6PD_RAT	59 kDa	1	0.9
60S ribosomal protein L7 OS=Rattus norvegicus GN=Rpl7 PE=1 SV=2	sp|P05426|RL7_RAT	30 kDa	1	1.2
UDP-glucuronosyltransferase 2B15 OS=Rattus norvegicus GN=Ugt2b15 PE=1 SV=1	sp|P36511|UDB15_RAT	61 kDa	1	1.2
Polyadenylate-binding protein 1 OS=Rattus norvegicus GN=Pabpc1 PE=2 SV=1	sp|Q9EPH8|PABP1_RAT	71 kDa	1	1.2
17-beta-hydroxysteroid dehydrogenase type 6 OS=Rattus norvegicus GN=Hsd17b6 PE=1 SV=2	sp|O54753|H17B6_RAT	36 kDa	1	0.8
Sterol-4-alpha-carboxylate 3-dehydrogenase, decarboxylating OS=Rattus norvegicus GN=Nsdhl PE=2 SV=1	sp|Q5PPL3|NSDHL_RAT	40 kDa	1	0.8
Fibrinogen gamma chain OS=Rattus norvegicus GN=Fgg PE=1 SV=3	sp|P02680|FIBG_RAT	51 kDa	1	0.9
Cytochrome P450 2C70 OS=Rattus norvegicus GN=Cyp2c70 PE=2 SV=1	sp|P19225|CP270_RAT	56 kDa	1	1.1
Elongation factor 1-gamma OS=Rattus norvegicus GN=Eef1g PE=1 SV=3	sp|Q68FR6|EF1G_RAT	50 kDa	1	1.3
Ras-related protein Rab-7a OS=Rattus norvegicus GN=Rab7a PE=1 SV=2	sp|P09527|RAB7A_RAT	24 kDa	1	1.1
Proteasome subunit beta type-8 OS=Rattus norvegicus GN=Psmb8 PE=1 SV=3	sp|P28064|PSB8_RAT	31 kDa	1	1.3
40S ribosomal protein S12 OS=Rattus norvegicus GN=Rps12 PE=1 SV=2	sp|P63324|RS12_RAT	15 kDa	1	1.3
Heterogeneous nuclear ribonucleoprotein K OS=Rattus norvegicus GN=Hnrnpk PE=1 SV=1	sp|P61980|HNRPK_RAT	51 kDa	1	1.1
Glycine cleavage system H protein, mitochondrial OS=Rattus norvegicus GN=Gcsh PE=2 SV=1	sp|Q5I0P2|GCSH_RAT	18 kDa	1	0.9
3-hydroxyisobutyrate dehydrogenase, mitochondrial OS=Rattus norvegicus GN=Hibadh PE=1 SV=3	sp|P29266|3HIDH_RAT	35 kDa	1	1.1
Glucose-6-phosphate isomerase OS=Rattus norvegicus GN=Gpi PE=1 SV=1	sp|Q6P6V0|G6PI_RAT	63 kDa	1	1.2
Endoplasmic reticulum resident protein 29 OS=Rattus norvegicus GN=Erp29 PE=1 SV=2	sp|P52555|ERP29_RAT	29 kDa	1	0.9
Vitamin D-binding protein OS=Rattus norvegicus GN=Gc PE=1 SV=3	sp|P04276|VTDB_RAT	54 kDa	1	1
Mitochondrial-processing peptidase subunit alpha OS=Rattus norvegicus GN=Pmpca PE=1 SV=1	sp|P20069|MPPA_RAT	59 kDa	1	1
Cluster of Fructose-bisphosphate aldolase A OS=Rattus norvegicus GN=Aldoa PE=1 SV=2 (sp|P05065|ALDOA_RAT)	sp|P05065|ALDOA_RAT [2]	39 kDa	1	1
Ribonuclease inhibitor OS=Rattus norvegicus GN=Rnh1 PE=1 SV=2	sp|P29315|RINI_RAT	50 kDa	1	1.2
40S ribosomal protein S11 OS=Rattus norvegicus GN=Rps11 PE=1 SV=3	sp|P62282|RS11_RAT	18 kDa	1	1.5
60S ribosomal protein L8 OS=Rattus norvegicus GN=Rpl8 PE=2 SV=2	sp|P62919|RL8_RAT	28 kDa	1	1.4
High mobility group protein B1 OS=Rattus norvegicus GN=Hmgb1 PE=1 SV=2	sp|P63159|HMGB1_RAT	25 kDa	1	0.9
Vesicle-associated membrane protein-associated protein A OS=Rattus norvegicus GN=Vapa PE=1 SV=3	sp|Q9Z270|VAPA_RAT	28 kDa	1	0.9
Glycerate kinase OS=Rattus norvegicus GN=Glyctk PE=2 SV=1	sp|Q0VGK3|GLCTK_RAT	55 kDa	1	1.2
ES1 protein homolog, mitochondrial OS=Rattus norvegicus PE=1 SV=2	sp|P56571|ES1_RAT	28 kDa	1	1
60S ribosomal protein L19 OS=Rattus norvegicus GN=Rpl19 PE=1 SV=1	sp|P84100|RL19_RAT	23 kDa	1	1.2
2-oxoisovalerate dehydrogenase subunit beta, mitochondrial OS=Rattus norvegicus GN=Bckdhb PE=1 SV=3	sp|P35738|ODBB_RAT	43 kDa	1	1.2
Transaldolase OS=Rattus norvegicus GN=Taldo1 PE=1 SV=2	sp|Q9EQS0|TALDO_RAT	37 kDa	1	1.1
Cluster of Dynamin-2 OS=Rattus norvegicus GN=Dnm2 PE=1 SV=1 (sp|P39052|DYN2_RAT)	sp|P39052|DYN2_RAT [3]	98 kDa	1	1
Proteasome subunit alpha type-3 OS=Rattus norvegicus GN=Psma3 PE=1 SV=3	sp|P18422|PSA3_RAT	28 kDa	1	1.2
60S ribosomal protein L27 OS=Rattus norvegicus GN=Rpl27 PE=2 SV=2	sp|P61354|RL27_RAT	16 kDa	1	1.1
Cytochrome c oxidase subunit 7A2, mitochondrial OS=Rattus norvegicus GN=Cox7a2 PE=1 SV=1	sp|P35171|CX7A2_RAT	9 kDa	1	0.8
Eukaryotic translation initiation factor 3 subunit B OS=Rattus norvegicus GN=Eif3b PE=1 SV=1	sp|Q4G061|EIF3B_RAT	91 kDa	1	1
Actin-related protein 2 OS=Rattus norvegicus GN=Actr2 PE=1 SV=1	sp|Q5M7U6|ARP2_RAT	45 kDa	1	1.1
Estradiol 17-beta-dehydrogenase 2 OS=Rattus norvegicus GN=Hsd17b2 PE=2 SV=1	sp|Q62730|DHB2_RAT	42 kDa	1	1
3-mercaptopyruvate sulfurtransferase OS=Rattus norvegicus GN=Mpst PE=1 SV=3	sp|P97532|THTM_RAT	33 kDa	1	1.1
Mitochondrial-processing peptidase subunit beta OS=Rattus norvegicus GN=Pmpcb PE=1 SV=3	sp|Q03346|MPPB_RAT	54 kDa	1	1.1
Glucokinase regulatory protein OS=Rattus norvegicus GN=Gckr PE=1 SV=3	sp|Q07071|GCKR_RAT	69 kDa	1	0.9
40S ribosomal protein S17 OS=Rattus norvegicus GN=Rps17 PE=2 SV=3	sp|P04644|RS17_RAT	16 kDa	1	0.9
Delta-aminolevulinic acid dehydratase OS=Rattus norvegicus GN=Alad PE=1 SV=1	sp|P06214|HEM2_RAT	36 kDa	1	1.1
40S ribosomal protein S18 OS=Rattus norvegicus GN=Rps18 PE=1 SV=3	sp|P62271|RS18_RAT	18 kDa	1	1.1
Selenocysteine lyase OS=Rattus norvegicus GN=Scly PE=1 SV=1	sp|Q68FT9|SCLY_RAT	47 kDa	1	1.2
Cluster of Heterogeneous nuclear ribonucleoprotein D0 OS=Rattus norvegicus GN=Hnrnpd PE=1 SV=1 (sp|Q9JJ54|HNRPD_RAT)	sp|Q9JJ54|HNRPD_RAT [2]	38 kDa	1	1.3
Insulin-degrading enzyme OS=Rattus norvegicus GN=Ide PE=1 SV=1	sp|P35559|IDE_RAT	118 kDa	1	1.1
Matrin-3 OS=Rattus norvegicus GN=Matr3 PE=1 SV=2	sp|P43244|MATR3_RAT	94 kDa	1	1
Cluster of Ubiquitin-40S ribosomal protein S27a OS=Rattus norvegicus GN=Rps27a PE=1 SV=2 (sp|P62982|RS27A_RAT)	sp|P62982|RS27A_RAT [3]	18 kDa	1	0.8
Cluster of Dihydropyrimidinase-related protein 2 OS=Rattus norvegicus GN=Dpysl2 PE=1 SV=1 (sp|P47942|DPYL2_RAT)	sp|P47942|DPYL2_RAT [2]	62 kDa	1	0.9
Actin-related protein 2/3 complex subunit 2 OS=Rattus norvegicus GN=Arpc2 PE=1 SV=1	sp|P85970|ARPC2_RAT	34 kDa	1	1.1
Elongation factor G, mitochondrial OS=Rattus norvegicus GN=Gfm1 PE=1 SV=2	sp|Q07803|EFGM_RAT	83 kDa	1	0.9
60S ribosomal protein L10a OS=Rattus norvegicus GN=Rpl10a PE=1 SV=2	sp|P62907|RL10A_RAT	25 kDa	1	1.2
Hydroxysteroid dehydrogenase-like protein 2 OS=Rattus norvegicus GN=Hsdl2 PE=2 SV=1	sp|Q4V8F9|HSDL2_RAT	58 kDa	1	1.1
Dehydrogenase/reductase SDR family member 4 OS=Rattus norvegicus GN=Dhrs4 PE=2 SV=2	sp|Q8VID1|DHRS4_RAT	30 kDa	1	1
Cluster of ADP-ribosylation factor 4 OS=Rattus norvegicus GN=Arf4 PE=2 SV=2 (sp|P61751|ARF4_RAT)	sp|P61751|ARF4_RAT [3]	20 kDa	1	0.9
E3 UFM1-protein ligase 1 OS=Rattus norvegicus GN=Ufl1 PE=2 SV=1	sp|B2GV24|UFL1_RAT	90 kDa	1	1
Long-chain-fatty-acid--CoA ligase 4 OS=Rattus norvegicus GN=Acsl4 PE=2 SV=1	sp|O35547|ACSL4_RAT	74 kDa	1	1.1
NADH dehydrogenase [ubiquinone] flavoprotein 2, mitochondrial OS=Rattus norvegicus GN=Ndufv2 PE=1 SV=2	sp|P19234|NDUV2_RAT	27 kDa	1	0.8
Cluster of Guanine nucleotide-binding protein subunit alpha-12 OS=Rattus norvegicus GN=Gna12 PE=2 SV=3 (sp|Q63210|GNA12_RAT)	sp|Q63210|GNA12_RAT [3]	44 kDa	1	1.3
Lanosterol 14-alpha demethylase OS=Rattus norvegicus GN=Cyp51a1 PE=2 SV=1	sp|Q64654|CP51A_RAT	57 kDa	1	1.1
Beta-lactamase-like protein 2 OS=Rattus norvegicus GN=Lactb2 PE=2 SV=1	sp|Q561R9|LACB2_RAT	32 kDa	1	1
Isocitrate dehydrogenase [NAD] subunit beta, mitochondrial OS=Rattus norvegicus GN=Idh3B PE=1 SV=1	sp|Q68FX0|IDH3B_RAT	42 kDa	1	1
Gamma-butyrobetaine dioxygenase OS=Rattus norvegicus GN=Bbox1 PE=1 SV=1	sp|Q9QZU7|BODG_RAT	45 kDa	1	1.1
Apolipoprotein A-IV OS=Rattus norvegicus GN=Apoa4 PE=2 SV=2	sp|P02651|APOA4_RAT	44 kDa	1	0.9
60S ribosomal protein L13 OS=Rattus norvegicus GN=Rpl13 PE=1 SV=2	sp|P41123|RL13_RAT	24 kDa	1	1.3
NADP-dependent malic enzyme OS=Rattus norvegicus GN=Me1 PE=1 SV=2	sp|P13697|MAOX_RAT	64 kDa	1	1.2
L-xylulose reductase OS=Rattus norvegicus GN=Dcxr PE=1 SV=1	sp|Q920P0|DCXR_RAT	26 kDa	1	1.2
N-acylneuraminate cytidylyltransferase OS=Rattus norvegicus GN=Cmas PE=2 SV=1	sp|P69060|NEUA_RAT	48 kDa	1	1.1
Non-POU domain-containing octamer-binding protein OS=Rattus norvegicus GN=Nono PE=2 SV=3	sp|Q5FVM4|NONO_RAT	55 kDa	1	1.1
Peptidyl-prolyl cis-trans isomerase D OS=Rattus norvegicus GN=Ppid PE=1 SV=3	sp|Q6DGG0|PPID_RAT	41 kDa	1	1.1
Phospholipid hydroperoxide glutathione peroxidase, nuclear OS=Rattus norvegicus GN=Gpx4 PE=2 SV=3	sp|Q91XR8|GPX42_RAT	29 kDa	1	1
Agmatinase, mitochondrial OS=Rattus norvegicus GN=Agmat PE=2 SV=1	sp|Q0D2L3|SPEB_RAT	38 kDa	1	1
Coatomer subunit gamma-1 OS=Rattus norvegicus GN=Copg1 PE=2 SV=1	sp|Q4AEF8|COPG1_RAT	98 kDa	1	1.3
Carboxylesterase 1E OS=Rattus norvegicus GN=Ces1e PE=2 SV=1	sp|Q63108|EST1E_RAT	62 kDa	1	1
EH domain-containing protein 1 OS=Rattus norvegicus GN=Ehd1 PE=1 SV=1	sp|Q641Z6|EHD1_RAT	61 kDa	1	0.9
Quinone oxidoreductase OS=Rattus norvegicus GN=Cryz PE=2 SV=1	sp|Q6AYT0|QOR_RAT	35 kDa	1	1.1
Iodotyrosine dehalogenase 1 OS=Rattus norvegicus GN=Iyd PE=2 SV=1	sp|Q5BK17|IYD1_RAT	33 kDa	1	1
Cluster of Keratin, type I cytoskeletal 19 OS=Rattus norvegicus GN=Krt19 PE=1 SV=2 (sp|Q63279|K1C19_RAT)	sp|Q63279|K1C19_RAT [6]	45 kDa	1	1.1
Proteasome activator complex subunit 2 OS=Rattus norvegicus GN=Psme2 PE=2 SV=3	sp|Q63798|PSME2_RAT	27 kDa	1	1.1
Ubiquinone biosynthesis protein COQ9, mitochondrial OS=Rattus norvegicus GN=Coq9 PE=2 SV=2	sp|Q68FT1|COQ9_RAT	35 kDa	1	1.1
Nitrilase homolog 1 OS=Rattus norvegicus GN=Nit1 PE=2 SV=1	sp|Q7TQ94|NIT1_RAT	32 kDa	1	1
Unconventional myosin-Id OS=Rattus norvegicus GN=Myo1d PE=1 SV=3	sp|Q63357|MYO1D_RAT	116 kDa	1	0.8
Abhydrolase domain-containing protein 14B OS=Rattus norvegicus GN=Abhd14b PE=2 SV=1	sp|Q6DGG1|ABHEB_RAT	23 kDa	1	1.3
Retinol-binding protein 1 OS=Rattus norvegicus GN=Rbp1 PE=1 SV=2	sp|P02696|RET1_RAT	16 kDa	1	1.2
Aflatoxin B1 aldehyde reductase member 3 OS=Rattus norvegicus GN=Akr7a3 PE=1 SV=2	sp|P38918|ARK73_RAT	37 kDa	1	1
Hsc70-interacting protein OS=Rattus norvegicus GN=St13 PE=1 SV=1	sp|P50503|F10A1_RAT	41 kDa	1	1.2
NXPE family member 4 OS=Rattus norvegicus GN=Nxpe4 PE=2 SV=1	sp|Q5XI89|NXPE4_RAT	62 kDa	1	0.9
Sorting nexin-5 OS=Rattus norvegicus GN=Snx5 PE=1 SV=1	sp|B1H267|SNX5_RAT	47 kDa	1	1.1
Mannosyl-oligosaccharide glucosidase OS=Rattus norvegicus GN=Mogs PE=1 SV=1	sp|O88941|MOGS_RAT	92 kDa	1	1.3
Ras-related protein Rab-2A OS=Rattus norvegicus GN=Rab2a PE=1 SV=1	sp|P05712|RAB2A_RAT	24 kDa	1	0.9
40S ribosomal protein S14 OS=Rattus norvegicus GN=Rps14 PE=2 SV=3	sp|P13471|RS14_RAT	16 kDa	1	0.9
60S ribosomal protein L28 OS=Rattus norvegicus GN=Rpl28 PE=1 SV=4	sp|P17702|RL28_RAT	16 kDa	1	1.6
NADH dehydrogenase [ubiquinone] 1 alpha subcomplex subunit 9, mitochondrial OS=Rattus norvegicus GN=Ndufa9 PE=1 SV=2	sp|Q5BK63|NDUA9_RAT	43 kDa	1	0.9
Rho GDP-dissociation inhibitor 1 OS=Rattus norvegicus GN=Arhgdia PE=1 SV=1	sp|Q5XI73|GDIR1_RAT	23 kDa	1	1.1
Isoamyl acetate-hydrolyzing esterase 1 homolog OS=Rattus norvegicus GN=Iah1 PE=2 SV=2	sp|Q711G3|IAH1_RAT	28 kDa	1	0.9
Peroxiredoxin-4 OS=Rattus norvegicus GN=Prdx4 PE=2 SV=1	sp|Q9Z0V5|PRDX4_RAT	31 kDa	1	1
Acyl-coenzyme A amino acid N-acyltransferase 2 OS=Rattus norvegicus GN=Acnat2 PE=2 SV=1	sp|Q5FVR5|ACNT2_RAT	46 kDa	1	1
Threonine synthase-like 2 OS=Rattus norvegicus GN=Thnsl2 PE=2 SV=1	sp|Q5M7T9|THNS2_RAT	54 kDa	1	1.1
Inter-alpha-trypsin inhibitor heavy chain H3 OS=Rattus norvegicus GN=Itih3 PE=2 SV=1	sp|Q63416|ITIH3_RAT	99 kDa	1	1.1
Heterogeneous nuclear ribonucleoprotein A3 OS=Rattus norvegicus GN=Hnrnpa3 PE=1 SV=1	sp|Q6URK4|ROA3_RAT	40 kDa	1	1
Carboxymethylenebutenolidase homolog OS=Rattus norvegicus GN=Cmbl PE=2 SV=1	sp|Q7TP52|CMBL_RAT	28 kDa	1	1
Peroxisomal 2,4-dienoyl-CoA reductase OS=Rattus norvegicus GN=Decr2 PE=2 SV=1	sp|Q9Z2M4|DECR2_RAT	31 kDa	1	1.1
Eukaryotic translation initiation factor 3 subunit C OS=Rattus norvegicus GN=Eif3c PE=2 SV=1	sp|B5DFC8|EIF3C_RAT	105 kDa	1	1.1
Integrin beta-1 OS=Rattus norvegicus GN=Itgb1 PE=2 SV=1	sp|P49134|ITB1_RAT	88 kDa	1	0.9
Valine--tRNA ligase OS=Rattus norvegicus GN=Vars PE=2 SV=2	sp|Q04462|SYVC_RAT	140 kDa	1	1.3
60S ribosomal protein L14 OS=Rattus norvegicus GN=Rpl14 PE=1 SV=3	sp|Q63507|RL14_RAT	23 kDa	1	1.5
Guanidinoacetate N-methyltransferase OS=Rattus norvegicus GN=Gamt PE=1 SV=2	sp|P10868|GAMT_RAT	26 kDa	1	0.9
60S ribosomal protein L15 OS=Rattus norvegicus GN=Rpl15 PE=1 SV=2	sp|P61314|RL15_RAT	24 kDa	1	1.1
E3 ubiquitin-protein ligase UBR4 OS=Rattus norvegicus GN=Ubr4 PE=2 SV=2	sp|Q2TL32|UBR4_RAT	574 kDa	1	1.1
Aldehyde dehydrogenase family 16 member A1 OS=Rattus norvegicus GN=Aldh16a1 PE=2 SV=1	sp|Q3T1L0|A16A1_RAT	85 kDa	1	1.1
ATP synthase subunit epsilon, mitochondrial OS=Rattus norvegicus GN=Atp5e PE=1 SV=2	sp|P29418|ATP5E_RAT	6 kDa	1	1.1
Tricarboxylate transport protein, mitochondrial OS=Rattus norvegicus GN=Slc25a1 PE=1 SV=1	sp|P32089|TXTP_RAT	34 kDa	1	1
Mitochondrial import inner membrane translocase subunit Tim13 OS=Rattus norvegicus GN=Timm13 PE=2 SV=1	sp|P62076|TIM13_RAT	10 kDa	1	1
Cluster of Serine/threonine-protein phosphatase PP1-gamma catalytic subunit OS=Rattus norvegicus GN=Ppp1cc PE=1 SV=1 (sp|P63088|PP1G_RAT)	sp|P63088|PP1G_RAT [3]	37 kDa	1	1.3
D-2-hydroxyglutarate dehydrogenase, mitochondrial OS=Rattus norvegicus GN=D2hgdh PE=3 SV=1	sp|P84850|D2HDH_RAT	59 kDa	1	0.9
Phosphatidylinositide phosphatase SAC1 OS=Rattus norvegicus GN=Sacm1l PE=1 SV=1	sp|Q9ES21|SAC1_RAT	67 kDa	1	0.8
Glycine N-acyltransferase-like protein Keg1 OS=Rattus norvegicus GN=Keg1 PE=1 SV=2	sp|Q9Z2Y0|KEG1_RAT	34 kDa	1	1.1
ATP synthase subunit e, mitochondrial OS=Rattus norvegicus GN=Atp5i PE=1 SV=3	sp|P29419|ATP5I_RAT	8 kDa	1	0.9
40S ribosomal protein S7 OS=Rattus norvegicus GN=Rps7 PE=1 SV=1	sp|P62083|RS7_RAT	22 kDa	1	1
Bifunctional epoxide hydrolase 2 OS=Rattus norvegicus GN=Ephx2 PE=1 SV=1	sp|P80299|HYES_RAT	62 kDa	1	0.9
NADH dehydrogenase [ubiquinone] iron-sulfur protein 4, mitochondrial OS=Rattus norvegicus GN=Ndufs4 PE=1 SV=1	sp|Q5XIF3|NDUS4_RAT	20 kDa	1	0.9
Cytosolic non-specific dipeptidase OS=Rattus norvegicus GN=Cndp2 PE=1 SV=1	sp|Q6Q0N1|CNDP2_RAT	53 kDa	1	1.1
Nicotinamide phosphoribosyltransferase OS=Rattus norvegicus GN=Nampt PE=1 SV=1	sp|Q80Z29|NAMPT_RAT	55 kDa	1	0.9
Prolargin OS=Rattus norvegicus GN=Prelp PE=2 SV=1	sp|Q9EQP5|PRELP_RAT	43 kDa	1	1.1
60S ribosomal protein L21 OS=Rattus norvegicus GN=Rpl21 PE=1 SV=3	sp|P20280|RL21_RAT	18 kDa	1	1.2
Mitochondrial pyruvate carrier 1 OS=Rattus norvegicus GN=Mpc1 PE=2 SV=1	sp|P63031|MPC1_RAT	12 kDa	1	1.1
Aromatic-L-amino-acid decarboxylase OS=Rattus norvegicus GN=Ddc PE=1 SV=1	sp|P14173|DDC_RAT	54 kDa	1	1
Phosphatidylinositol transfer protein beta isoform OS=Rattus norvegicus GN=Pitpnb PE=1 SV=2	sp|P53812|PIPNB_RAT	31 kDa	1	1
Integrin alpha-1 OS=Rattus norvegicus GN=Itga1 PE=1 SV=1	sp|P18614|ITA1_RAT	131 kDa	1	1
Nuclear pore complex protein Nup155 OS=Rattus norvegicus GN=Nup155 PE=1 SV=1	sp|P37199|NU155_RAT	155 kDa	1	1.2
60S ribosomal protein L32 OS=Rattus norvegicus GN=Rpl32 PE=1 SV=2	sp|P62912|RL32_RAT	16 kDa	1	1.2
Cytochrome c oxidase subunit 2 OS=Rattus norvegicus GN=Mtco2 PE=2 SV=2	sp|P00406|COX2_RAT	26 kDa	1	0.8
Acidic leucine-rich nuclear phosphoprotein 32 family member A OS=Rattus norvegicus GN=Anp32a PE=2 SV=1	sp|P49911|AN32A_RAT	29 kDa	1	1
Eukaryotic translation initiation factor 2 subunit 3 OS=Rattus norvegicus GN=Eif2s3 PE=1 SV=2	sp|P81795|IF2G_RAT	51 kDa	1	1.1
Retinoid-inducible serine carboxypeptidase OS=Rattus norvegicus GN=Scpep1 PE=2 SV=1	sp|Q920A6|RISC_RAT	51 kDa	1	1.2
Cysteine desulfurase, mitochondrial OS=Rattus norvegicus GN=Nfs1 PE=2 SV=1	sp|Q99P39|NFS1_RAT	50 kDa	1	1
Na(+)/H(+) exchange regulatory cofactor NHE-RF1 OS=Rattus norvegicus GN=Slc9a3r1 PE=1 SV=3	sp|Q9JJ19|NHRF1_RAT	39 kDa	1	1.1
Na(+)/H(+) exchange regulatory cofactor NHE-RF3 OS=Rattus norvegicus GN=Pdzk1 PE=1 SV=2	sp|Q9JJ40|NHRF3_RAT	57 kDa	1	1.3
Steryl-sulfatase OS=Rattus norvegicus GN=Sts PE=1 SV=2	sp|P15589|STS_RAT	63 kDa	1	0.8
Basigin OS=Rattus norvegicus GN=Bsg PE=1 SV=2	sp|P26453|BASI_RAT	42 kDa	1	0.9
Coiled-coil domain-containing protein 51 OS=Rattus norvegicus GN=Ccdc51 PE=2 SV=2	sp|Q5PPN7|CCD51_RAT	46 kDa	1	1.1
Secernin-2 OS=Rattus norvegicus GN=Scrn2 PE=2 SV=1	sp|Q6AYR8|SCRN2_RAT	47 kDa	1	1.1
Surfeit locus protein 1 OS=Rattus norvegicus GN=Surf1 PE=2 SV=1	sp|Q9QXU2|SURF1_RAT	35 kDa	1	0.8
Hydroxymethylglutaryl-CoA synthase, cytoplasmic OS=Rattus norvegicus GN=Hmgcs1 PE=1 SV=1	sp|P17425|HMCS1_RAT	57 kDa	1	1.2
Arginine--tRNA ligase, cytoplasmic OS=Rattus norvegicus GN=Rars PE=1 SV=2	sp|P40329|SYRC_RAT	76 kDa	1	1.2
Metalloreductase STEAP4 OS=Rattus norvegicus GN=Steap4 PE=1 SV=1	sp|Q4V8K1|STEA4_RAT	53 kDa	1	0.9
60S ribosomal protein L35a OS=Rattus norvegicus GN=Rpl35a PE=3 SV=1	sp|P04646|RL35A_RAT	13 kDa	1	1.5
Proteasome subunit alpha type-2 OS=Rattus norvegicus GN=Psma2 PE=1 SV=3	sp|P17220|PSA2_RAT	26 kDa	1	1.1
40S ribosomal protein S5 OS=Rattus norvegicus GN=Rps5 PE=2 SV=3	sp|P24050|RS5_RAT	23 kDa	1	0.8
Lanosterol synthase OS=Rattus norvegicus GN=Lss PE=1 SV=2	sp|P48450|ERG7_RAT	83 kDa	1	0.9
Lumican OS=Rattus norvegicus GN=Lum PE=2 SV=1	sp|P51886|LUM_RAT	38 kDa	1	0.8
60S ribosomal protein L36a OS=Rattus norvegicus GN=Rpl36a PE=1 SV=2	sp|P83883|RL36A_RAT	12 kDa	1	1.3
Glycerol-3-phosphate acyltransferase 1, mitochondrial OS=Rattus norvegicus GN=Gpam PE=1 SV=3	sp|P97564|GPAT1_RAT	94 kDa	1	1
Regulator of microtubule dynamics protein 2 OS=Rattus norvegicus GN=Fam82a1 PE=2 SV=1	sp|Q498D5|RMD2_RAT	47 kDa	1	1
UMP-CMP kinase OS=Rattus norvegicus GN=Cmpk1 PE=1 SV=2	sp|Q4KM73|KCY_RAT	22 kDa	1	1.1
Signal recognition particle 54 kDa protein OS=Rattus norvegicus GN=Srp54 PE=2 SV=1	sp|Q6AYB5|SRP54_RAT	56 kDa	1	0.9
Estradiol 17-beta-dehydrogenase 11 OS=Rattus norvegicus GN=Hsd17b11 PE=2 SV=1	sp|Q6AYS8|DHB11_RAT	33 kDa	1	1
Caseinolytic peptidase B protein homolog OS=Rattus norvegicus GN=Clpb PE=2 SV=1	sp|Q9WTT2|CLPB_RAT	76 kDa	1	1
Calumenin OS=Rattus norvegicus GN=Calu PE=1 SV=1	sp|O35783|CALU_RAT	37 kDa	1	1
Rab GDP dissociation inhibitor alpha OS=Rattus norvegicus GN=Gdi1 PE=1 SV=1	sp|P50398|GDIA_RAT	51 kDa	1	1
Prostaglandin reductase 1 OS=Rattus norvegicus GN=Ptgr1 PE=2 SV=3	sp|P97584|PTGR1_RAT	36 kDa	1	1.3
ATP-dependent RNA helicase DDX1 OS=Rattus norvegicus GN=Ddx1 PE=2 SV=1	sp|Q641Y8|DDX1_RAT	82 kDa	1	1.1
V-type proton ATPase subunit E 1 OS=Rattus norvegicus GN=Atp6v1e1 PE=1 SV=1	sp|Q6PCU2|VATE1_RAT	26 kDa	1	0.9
Glutathione reductase (Fragment) OS=Rattus norvegicus GN=Gsr PE=2 SV=2	sp|P70619|GSHR_RAT	46 kDa	1	1.1
Cadherin-2 OS=Rattus norvegicus GN=Cdh2 PE=1 SV=1	sp|Q9Z1Y3|CADH2_RAT	100 kDa	1	0.9
Up-regulated during skeletal muscle growth protein 5 OS=Rattus norvegicus GN=Usmg5 PE=1 SV=1	sp|Q9JJW3|USMG5_RAT	6 kDa	1	1
Ethanolamine-phosphate cytidylyltransferase OS=Rattus norvegicus GN=Pcyt2 PE=1 SV=1	sp|O88637|PCY2_RAT	45 kDa	1	0.9
Ceruloplasmin OS=Rattus norvegicus GN=Cp PE=1 SV=3	sp|P13635|CERU_RAT	121 kDa	1	1
Glutathione S-transferase theta-2 OS=Rattus norvegicus GN=Gstt2 PE=1 SV=3	sp|P30713|GSTT2_RAT	27 kDa	1	1.1
Proteasome subunit alpha type-5 OS=Rattus norvegicus GN=Psma5 PE=2 SV=1	sp|P34064|PSA5_RAT	26 kDa	1	1.1
Probable proline--tRNA ligase, mitochondrial OS=Rattus norvegicus GN=Pars2 PE=2 SV=1	sp|Q5M7W7|SYPM_RAT	53 kDa	1	1.1
Ferritin heavy chain OS=Rattus norvegicus GN=Fth1 PE=1 SV=3	sp|P19132|FRIH_RAT	21 kDa	1	1.3
Apolipoprotein C-I OS=Rattus norvegicus GN=Apoc1 PE=2 SV=1	sp|P19939|APOC1_RAT	10 kDa	1	0.9
Multidrug resistance-associated protein 6 OS=Rattus norvegicus GN=Abcc6 PE=2 SV=1	sp|O88269|MRP6_RAT	165 kDa	1	1.1
Cluster of cAMP-dependent protein kinase type I-alpha regulatory subunit OS=Rattus norvegicus GN=Prkar1a PE=2 SV=2 (sp|P09456|KAP0_RAT)	sp|P09456|KAP0_RAT [2]	43 kDa	1	1
Cluster of Ig gamma-2A chain C region OS=Rattus norvegicus GN=Igg-2a PE=1 SV=1 (sp|P20760|IGG2A_RAT)	sp|P20760|IGG2A_RAT [2]	35 kDa	1	1.5
Serpin H1 OS=Rattus norvegicus GN=Serpinh1 PE=1 SV=1	sp|P29457|SERPH_RAT	47 kDa	1	1
60S ribosomal protein L11 OS=Rattus norvegicus GN=Rpl11 PE=1 SV=2	sp|P62914|RL11_RAT	20 kDa	1	1.1
60S ribosomal protein L24 OS=Rattus norvegicus GN=Rpl24 PE=1 SV=1	sp|P83732|RL24_RAT	18 kDa	1	1.3
ER membrane protein complex subunit 2 OS=Rattus norvegicus GN=Emc2 PE=2 SV=1	sp|B0BNG0|EMC2_RAT	35 kDa	1	0.9
Proteasome subunit alpha type-7 OS=Rattus norvegicus GN=Psma7 PE=1 SV=1	sp|P48004|PSA7_RAT	28 kDa	1	1.3
V-type proton ATPase subunit B, brain isoform OS=Rattus norvegicus GN=Atp6v1b2 PE=1 SV=1	sp|P62815|VATB2_RAT	57 kDa	1	0.9
GTP-binding nuclear protein Ran OS=Rattus norvegicus GN=Ran PE=1 SV=3	sp|P62828|RAN_RAT	24 kDa	1	1.1
Glyoxalase domain-containing protein 4 OS=Rattus norvegicus GN=Glod4 PE=1 SV=1	sp|Q5I0D1|GLOD4_RAT	33 kDa	1	1.1
Isochorismatase domain-containing protein 1 OS=Rattus norvegicus GN=Isoc1 PE=2 SV=1	sp|Q6I7R3|ISOC1_RAT	32 kDa	1	1.1
Transmembrane protein 33 OS=Rattus norvegicus GN=Tmem33 PE=2 SV=1	sp|Q9Z142|TMM33_RAT	28 kDa	1	0.9
N(G),N(G)-dimethylarginine dimethylaminohydrolase 1 OS=Rattus norvegicus GN=Ddah1 PE=1 SV=3	sp|O08557|DDAH1_RAT	31 kDa	1	1.1
Beta-2-glycoprotein 1 OS=Rattus norvegicus GN=Apoh PE=2 SV=2	sp|P26644|APOH_RAT	33 kDa	1	0.9
Fatty acid-binding protein, brain OS=Rattus norvegicus GN=Fabp7 PE=1 SV=2	sp|P55051|FABP7_RAT	15 kDa	1	1.1
40S ribosomal protein S25 OS=Rattus norvegicus GN=Rps25 PE=2 SV=1	sp|P62853|RS25_RAT	14 kDa	1	1.3
Structural maintenance of chromosomes protein 3 OS=Rattus norvegicus GN=Smc3 PE=1 SV=1	sp|P97690|SMC3_RAT	138 kDa	1	1.2
Nuclear pore complex protein Nup93 OS=Rattus norvegicus GN=Nup93 PE=1 SV=1	sp|Q66HC5|NUP93_RAT	93 kDa	1	0.9
Mitochondrial peptide methionine sulfoxide reductase OS=Rattus norvegicus GN=Msra PE=1 SV=1	sp|Q923M1|MSRA_RAT	26 kDa	1	1.3
Ubiquitin-conjugating enzyme E2 N OS=Rattus norvegicus GN=Ube2n PE=1 SV=1	sp|Q9EQX9|UBE2N_RAT	17 kDa	1	1.2
DNA topoisomerase 1 OS=Rattus norvegicus GN=Top1 PE=2 SV=1	sp|Q9WUL0|TOP1_RAT	91 kDa	1	1.4
CD166 antigen OS=Rattus norvegicus GN=Alcam PE=1 SV=1	sp|O35112|CD166_RAT	65 kDa	1	1.2
Pro-cathepsin H OS=Rattus norvegicus GN=Ctsh PE=1 SV=1	sp|P00786|CATH_RAT	37 kDa	1	1.1
Nuclease-sensitive element-binding protein 1 OS=Rattus norvegicus GN=Ybx1 PE=1 SV=3	sp|P62961|YBOX1_RAT	36 kDa	1	1.2
Cluster of Ras-related protein Rap-1b OS=Rattus norvegicus GN=Rap1b PE=2 SV=2 (sp|Q62636|RAP1B_RAT)	sp|Q62636|RAP1B_RAT [2]	21 kDa	1	0.8
Nucleobindin-1 OS=Rattus norvegicus GN=Nucb1 PE=1 SV=1	sp|Q63083|NUCB1_RAT	54 kDa	1	1.4
Trans-2,3-enoyl-CoA reductase OS=Rattus norvegicus GN=Tecr PE=2 SV=1	sp|Q64232|TECR_RAT	36 kDa	1	1.1
Cytochrome c oxidase subunit 6C-2 OS=Rattus norvegicus GN=Cox6c2 PE=1 SV=3	sp|P11951|CX6C2_RAT	8 kDa	1	0.8
Protein FAM136A OS=Rattus norvegicus GN=Fam136a PE=2 SV=1	sp|B0BN94|F136A_RAT	16 kDa	1	1.1
Clusterin OS=Rattus norvegicus GN=Clu PE=1 SV=2	sp|P05371|CLUS_RAT	51 kDa	1	0.9
Phospholipase A-2-activating protein OS=Rattus norvegicus GN=Plaa PE=2 SV=3	sp|P54319|PLAP_RAT	87 kDa	1	1
Coiled-coil domain-containing protein 93 OS=Rattus norvegicus GN=Ccdc93 PE=1 SV=1	sp|Q5BJT7|CCD93_RAT	73 kDa	1	0.9
Cluster of Guanine nucleotide-binding protein G(s) subunit alpha isoforms XLas OS=Rattus norvegicus GN=Gnas PE=1 SV=3 (sp|Q63803|GNAS1_RAT)	sp|Q63803|GNAS1_RAT [2]	123 kDa	1	0.8
Septin-2 OS=Rattus norvegicus GN=Sept2 PE=1 SV=1	sp|Q91Y81|SEPT2_RAT	42 kDa	1	0.8
Serum amyloid P-component OS=Rattus norvegicus GN=Apcs PE=2 SV=2	sp|P23680|SAMP_RAT	26 kDa	1	1
Glutamate--cysteine ligase regulatory subunit OS=Rattus norvegicus GN=Gclm PE=1 SV=1	sp|P48508|GSH0_RAT	31 kDa	1	1.1
RuvB-like 1 OS=Rattus norvegicus GN=Ruvbl1 PE=1 SV=1	sp|P60123|RUVB1_RAT	50 kDa	1	1
E3 ubiquitin-protein ligase BRE1B OS=Rattus norvegicus GN=Rnf40 PE=1 SV=1	sp|Q8CJB9|BRE1B_RAT	114 kDa	1	1.1
Eukaryotic translation initiation factor 5B OS=Rattus norvegicus GN=Eif5b PE=1 SV=1	sp|B2GUV7|IF2P_RAT	138 kDa	1	1.1
D-amino-acid oxidase OS=Rattus norvegicus GN=Dao PE=2 SV=1	sp|O35078|OXDA_RAT	39 kDa	1	1.2
Myb-binding protein 1A OS=Rattus norvegicus GN=Mybbp1a PE=2 SV=2	sp|O35821|MBB1A_RAT	152 kDa	1	0.9
Cluster of Ig kappa chain C region, A allele OS=Rattus norvegicus PE=1 SV=1 (sp|P01836|KACA_RAT)	sp|P01836|KACA_RAT [2]	12 kDa	1	1.1
Asialoglycoprotein receptor 2 OS=Rattus norvegicus GN=Asgr2 PE=1 SV=4	sp|P08290|ASGR2_RAT	35 kDa	1	1.1
Proteasome subunit beta type-1 OS=Rattus norvegicus GN=Psmb1 PE=1 SV=3	sp|P18421|PSB1_RAT	26 kDa	1	0.9
Mitochondrial intermediate peptidase OS=Rattus norvegicus GN=Mipep PE=1 SV=1	sp|Q01992|MIPEP_RAT	81 kDa	1	1.1
von Willebrand factor A domain-containing protein 5A OS=Rattus norvegicus GN=Vwa5a PE=2 SV=1	sp|Q75WE7|VWA5A_RAT	91 kDa	1	1.2
40S ribosomal protein S15a OS=Rattus norvegicus GN=Rps15a PE=1 SV=2	sp|P62246|RS15A_RAT	15 kDa	1	1.2
Vesicle-trafficking protein SEC22b OS=Rattus norvegicus GN=Sec22b PE=1 SV=3	sp|Q4KM74|SC22B_RAT	25 kDa	1	1
GTP-binding protein SAR1b OS=Rattus norvegicus GN=Sar1b PE=2 SV=1	sp|Q5HZY2|SAR1B_RAT	22 kDa	1	0.9
Protein TBRG4 OS=Rattus norvegicus GN=Tbrg4 PE=2 SV=1	sp|Q5M9G9|TBRG4_RAT	71 kDa	1	1
Paraplegin OS=Rattus norvegicus GN=Spg7 PE=2 SV=1	sp|Q7TT47|SPG7_RAT	82 kDa	1	0.9
Stabilin-2 (Fragment) OS=Rattus norvegicus GN=Stab2 PE=1 SV=1	sp|Q8CFM6|STAB2_RAT	156 kDa	1	0.9
Cytochrome P450 4V2 OS=Rattus norvegicus GN=Cyp4v2 PE=2 SV=1	sp|A2RRT9|CP4V2_RAT	61 kDa	1	0.8
Transferrin receptor protein 2 OS=Rattus norvegicus GN=Tfr2 PE=2 SV=1	sp|B2GUY2|TFR2_RAT	88 kDa	1	1.1
Prolyl endopeptidase OS=Rattus norvegicus GN=Prep PE=1 SV=1	sp|O70196|PPCE_RAT	81 kDa	1	1.1
Mitofusin-2 OS=Rattus norvegicus GN=Mfn2 PE=1 SV=1	sp|Q8R500|MFN2_RAT	86 kDa	1	1
Dihydrofolate reductase OS=Rattus norvegicus GN=Dhfr PE=2 SV=3	sp|Q920D2|DYR_RAT	22 kDa	1	0.8
Mitochondrial import inner membrane translocase subunit Tim9 OS=Rattus norvegicus GN=Timm9 PE=1 SV=3	sp|Q9WV97|TIM9_RAT	10 kDa	1	1.1
Pre-mRNA-processing factor 6 OS=Rattus norvegicus GN=Prpf6 PE=2 SV=1	sp|A1A5S1|PRP6_RAT	107 kDa	1	1
H/ACA ribonucleoprotein complex subunit 4 OS=Rattus norvegicus GN=Dkc1 PE=1 SV=4	sp|P40615|DKC1_RAT	57 kDa	1	1
Serine/arginine-rich splicing factor 5 OS=Rattus norvegicus GN=Srsf5 PE=2 SV=1	sp|Q09167|SRSF5_RAT	31 kDa	1	1.1
Eukaryotic peptide chain release factor subunit 1 OS=Rattus norvegicus GN=Etf1 PE=2 SV=3	sp|Q5U2Q7|ERF1_RAT	49 kDa	1	0.8
Protein SEC13 homolog OS=Rattus norvegicus GN=Sec13 PE=1 SV=1	sp|Q5XFW8|SEC13_RAT	36 kDa	1	1.2
Eukaryotic translation initiation factor 3 subunit D OS=Rattus norvegicus GN=Eif3d PE=2 SV=1	sp|Q6AYK8|EIF3D_RAT	64 kDa	1	1.1
Transcription factor A, mitochondrial OS=Rattus norvegicus GN=Tfam PE=2 SV=1	sp|Q91ZW1|TFAM_RAT	28 kDa	1	1.2
7-dehydrocholesterol reductase OS=Rattus norvegicus GN=Dhcr7 PE=2 SV=1	sp|Q9Z2Z8|DHCR7_RAT	54 kDa	1	0.8
Nuclear pore membrane glycoprotein 210 OS=Rattus norvegicus GN=Pom210 PE=1 SV=1	sp|P11654|PO210_RAT	204 kDa	1	1
Lysosome-associated membrane glycoprotein 1 OS=Rattus norvegicus GN=Lamp1 PE=1 SV=1	sp|P14562|LAMP1_RAT	44 kDa	1	1
Cytochrome P450 2C13, male-specific OS=Rattus norvegicus GN=Cyp2c13 PE=1 SV=1	sp|P20814|CP2CD_RAT	56 kDa	1	1
Lupus La protein homolog OS=Rattus norvegicus GN=Ssb PE=2 SV=1	sp|P38656|LA_RAT	48 kDa	1	1.2
Fatty acid-binding protein, epidermal OS=Rattus norvegicus GN=Fabp5 PE=1 SV=3	sp|P55053|FABP5_RAT	15 kDa	1	1
Non-muscle caldesmon OS=Rattus norvegicus GN=Cald1 PE=1 SV=1	sp|Q62736|CALD1_RAT	61 kDa	1	0.9
Obg-like ATPase 1 OS=Rattus norvegicus GN=Ola1 PE=2 SV=1	sp|A0JPJ7|OLA1_RAT	45 kDa	1	1
Pyridoxal kinase OS=Rattus norvegicus GN=Pdxk PE=1 SV=1	sp|O35331|PDXK_RAT	35 kDa	1	1
Carboxylesterase 1C OS=Rattus norvegicus GN=Ces1c PE=1 SV=3	sp|P10959|EST1C_RAT	60 kDa	1	1
60S ribosomal protein L26 OS=Rattus norvegicus GN=Rpl26 PE=1 SV=1	sp|P12749|RL26_RAT	17 kDa	1	1.2
Carbonic anhydrase 2 OS=Rattus norvegicus GN=Ca2 PE=1 SV=2	sp|P27139|CAH2_RAT	29 kDa	1	1.3
Peroxiredoxin-2 OS=Rattus norvegicus GN=Prdx2 PE=1 SV=3	sp|P35704|PRDX2_RAT	22 kDa	1	1.3
Cluster of Ribose-phosphate pyrophosphokinase 1 OS=Rattus norvegicus GN=Prps1 PE=1 SV=2 (sp|P60892|PRPS1_RAT)	sp|P60892|PRPS1_RAT [2]	35 kDa	1	1.5
Unconventional myosin-IXb OS=Rattus norvegicus GN=Myo9b PE=1 SV=1	sp|Q63358|MYO9B_RAT	225 kDa	1	1
Monoglyceride lipase OS=Rattus norvegicus GN=Mgll PE=1 SV=1	sp|Q8R431|MGLL_RAT	33 kDa	1	1
Serine/arginine-rich splicing factor 2 OS=Rattus norvegicus GN=Srsf2 PE=1 SV=3	sp|Q6PDU1|SRSF2_RAT	25 kDa	1	0.9
ATP-dependent (S)-NAD(P)H-hydrate dehydratase OS=Rattus norvegicus GN=Carkd PE=3 SV=1	sp|D4AAT7|NNRD_RAT	37 kDa	1	0.9
E3 ubiquitin-protein ligase TRIP12 OS=Rattus norvegicus GN=Trip12 PE=2 SV=1	sp|F1LP64|TRIPC_RAT	224 kDa	1	1.1
Sorbin and SH3 domain-containing protein 2 OS=Rattus norvegicus GN=Sorbs2 PE=1 SV=2	sp|O35413|SRBS2_RAT	134 kDa	1	1.1
60S ribosomal protein L31 OS=Rattus norvegicus GN=Rpl31 PE=2 SV=1	sp|P62902|RL31_RAT	14 kDa	1	1.3
Eukaryotic translation initiation factor 5A-1 OS=Rattus norvegicus GN=Eif5a PE=1 SV=3	sp|Q3T1J1|IF5A1_RAT	17 kDa	1	1
Signal recognition particle receptor subunit beta OS=Rattus norvegicus GN=Srprb PE=2 SV=1	sp|Q4FZX7|SRPRB_RAT	30 kDa	1	1
Membrane-associated progesterone receptor component 2 OS=Rattus norvegicus GN=Pgrmc2 PE=1 SV=1	sp|Q5XIU9|PGRC2_RAT	23 kDa	1	0.9
Sterol O-acyltransferase 2 OS=Rattus norvegicus GN=Soat2 PE=2 SV=1	sp|Q7TQM4|SOAT2_RAT	60 kDa	1	1
O-acetyl-ADP-ribose deacetylase MACROD1 (Fragment) OS=Rattus norvegicus GN=Macrod1 PE=2 SV=2	sp|Q8K4G6|MACD1_RAT	29 kDa	1	1.1
Integrin-linked protein kinase OS=Rattus norvegicus GN=Ilk PE=2 SV=1	sp|Q99J82|ILK_RAT	51 kDa	1	1
Pre-mRNA-processing factor 19 OS=Rattus norvegicus GN=Prpf19 PE=2 SV=2	sp|Q9JMJ4|PRP19_RAT	55 kDa	1	1
Phosphatidylglycerophosphatase and protein-tyrosine phosphatase 1 OS=Rattus norvegicus GN=Ptpmt1 PE=2 SV=1	sp|P0C089|PTPM1_RAT	22 kDa	1	1
ATP synthase protein 8 OS=Rattus norvegicus GN=Mt-atp8 PE=1 SV=1	sp|P11608|ATP8_RAT	8 kDa	1	1
Serine/threonine-protein phosphatase 2A 65 kDa regulatory subunit A beta isoform OS=Rattus norvegicus GN=Ppp2r1b PE=2 SV=1	sp|Q4QQT4|2AAB_RAT	66 kDa	1	1.2
Tumor necrosis factor receptor superfamily member 11B OS=Rattus norvegicus GN=Tnfrsf11b PE=2 SV=1	sp|O08727|TR11B_RAT	46 kDa	1	1
Actin-related protein 2/3 complex subunit 1B OS=Rattus norvegicus GN=Arpc1b PE=2 SV=3	sp|O88656|ARC1B_RAT	41 kDa	1	1.1
Transthyretin OS=Rattus norvegicus GN=Ttr PE=1 SV=1	sp|P02767|TTHY_RAT	16 kDa	1	0.8
Phosphatidylinositol transfer protein alpha isoform OS=Rattus norvegicus GN=Pitpna PE=1 SV=2	sp|P16446|PIPNA_RAT	32 kDa	1	1
Cluster of Heme oxygenase 2 OS=Rattus norvegicus GN=Hmox2 PE=1 SV=1 (sp|P23711|HMOX2_RAT)	sp|P23711|HMOX2_RAT	36 kDa	1	1.1
Proteasome subunit beta type-4 OS=Rattus norvegicus GN=Psmb4 PE=1 SV=2	sp|P34067|PSB4_RAT	29 kDa	1	1.1
Transcription elongation factor B polypeptide 2 OS=Rattus norvegicus GN=Tceb2 PE=1 SV=1	sp|P62870|ELOB_RAT	13 kDa	1	1.1
Ubiquitin carboxyl-terminal hydrolase 7 OS=Rattus norvegicus GN=Usp7 PE=1 SV=1	sp|Q4VSI4|UBP7_RAT	128 kDa	1	1.1
CD81 antigen OS=Rattus norvegicus GN=Cd81 PE=1 SV=1	sp|Q62745|CD81_RAT	26 kDa	1	0.9
cAMP-dependent protein kinase type II-alpha regulatory subunit OS=Rattus norvegicus GN=Prkar2a PE=1 SV=3	sp|P12368|KAP2_RAT	46 kDa	1	1.1
Cluster of Glycogen [starch] synthase, liver OS=Rattus norvegicus GN=Gys2 PE=2 SV=2 (sp|P17625|GYS2_RAT)	sp|P17625|GYS2_RAT	81 kDa	1	1.1
Casein kinase II subunit alpha OS=Rattus norvegicus GN=Csnk2a1 PE=1 SV=2	sp|P19139|CSK21_RAT	45 kDa	1	0.9
Afamin OS=Rattus norvegicus GN=Afm PE=2 SV=1	sp|P36953|AFAM_RAT	69 kDa	1	1.2
Proteasome subunit beta type-3 OS=Rattus norvegicus GN=Psmb3 PE=1 SV=1	sp|P40112|PSB3_RAT	23 kDa	1	1.3
Transformer-2 protein homolog beta OS=Rattus norvegicus GN=Tra2b PE=1 SV=1	sp|P62997|TRA2B_RAT	34 kDa	1	0.9
AP-2 complex subunit mu OS=Rattus norvegicus GN=Ap2m1 PE=1 SV=1	sp|P84092|AP2M1_RAT	50 kDa	1	1.2
Polymerase I and transcript release factor OS=Rattus norvegicus GN=Ptrf PE=1 SV=1	sp|P85125|PTRF_RAT	44 kDa	1	1
Mitochondrial glutamate carrier 2 OS=Rattus norvegicus GN=Slc25a18 PE=2 SV=2	sp|Q505J6|GHC2_RAT	34 kDa	1	1
Delta(24)-sterol reductase OS=Rattus norvegicus GN=Dhcr24 PE=2 SV=2	sp|Q5BQE6|DHC24_RAT	60 kDa	1	1.1
Probable E3 ubiquitin-protein ligase HERC4 OS=Rattus norvegicus GN=Herc4 PE=2 SV=1	sp|Q5PQN1|HERC4_RAT	119 kDa	1	0.9
Sorting nexin-3 OS=Rattus norvegicus GN=Snx3 PE=1 SV=1	sp|Q5U211|SNX3_RAT	19 kDa	1	1
Nicalin OS=Rattus norvegicus GN=Ncln PE=2 SV=1	sp|Q5XIA1|NCLN_RAT	63 kDa	1	0.9
Unconventional myosin-Ie OS=Rattus norvegicus GN=Myo1e PE=1 SV=1	sp|Q63356|MYO1E_RAT	127 kDa	1	0.9
Beta-hexosaminidase subunit alpha OS=Rattus norvegicus GN=Hexa PE=2 SV=1	sp|Q641X3|HEXA_RAT	61 kDa	1	1
Alcohol dehydrogenase 4 OS=Rattus norvegicus GN=Adh4 PE=2 SV=3	sp|Q64563|ADH4_RAT	40 kDa	1	1
Uncharacterized protein C2orf47 homolog, mitochondrial OS=Rattus norvegicus PE=2 SV=1	sp|Q6AY04|CB047_RAT	33 kDa	1	1.1
Lactoylglutathione lyase OS=Rattus norvegicus GN=Glo1 PE=1 SV=3	sp|Q6P7Q4|LGUL_RAT	21 kDa	1	1.1
Thioredoxin-like protein 1 OS=Rattus norvegicus GN=Txnl1 PE=1 SV=3	sp|Q920J4|TXNL1_RAT	32 kDa	1	1
LIM and SH3 domain protein 1 OS=Rattus norvegicus GN=Lasp1 PE=1 SV=1	sp|Q99MZ8|LASP1_RAT	30 kDa	1	1
Arfaptin-1 OS=Rattus norvegicus GN=Arfip1 PE=2 SV=1	sp|Q9JHU5|ARFP1_RAT	41 kDa	1	1
Glutaredoxin-3 OS=Rattus norvegicus GN=Glrx3 PE=1 SV=2	sp|Q9JLZ1|GLRX3_RAT	38 kDa	1	1
Cluster of Sulfotransferase 1C2 OS=Rattus norvegicus GN=Sult1c2 PE=2 SV=1 (sp|Q9WUW8|ST1C2_RAT)	sp|Q9WUW8|ST1C2_RAT [2]	35 kDa	1	1.1
Carbonic anhydrase 1 OS=Rattus norvegicus GN=Ca1 PE=1 SV=1	sp|B0BNN3|CAH1_RAT	28 kDa	1	1.2
L-serine dehydratase/L-threonine deaminase OS=Rattus norvegicus GN=Sds PE=1 SV=3	sp|P09367|SDHL_RAT	38 kDa	1	1.2
Glutathione S-transferase alpha-4 OS=Rattus norvegicus GN=Gsta4 PE=1 SV=2	sp|P14942|GSTA4_RAT	26 kDa	1	1.1
Sulfate anion transporter 1 OS=Rattus norvegicus GN=Slc26a1 PE=2 SV=1	sp|P45380|S26A1_RAT	75 kDa	1	0.8
Biliverdin reductase A OS=Rattus norvegicus GN=Blvra PE=1 SV=1	sp|P46844|BIEA_RAT	34 kDa	1	1.2
Ectonucleotide pyrophosphatase/phosphodiesterase family member 3 OS=Rattus norvegicus GN=Enpp3 PE=1 SV=2	sp|P97675|ENPP3_RAT	99 kDa	1	1
F-actin-capping protein subunit alpha-2 OS=Rattus norvegicus GN=Capza2 PE=1 SV=1	sp|Q3T1K5|CAZA2_RAT	33 kDa	1	1
Cluster of RNA-binding motif protein, X chromosome OS=Rattus norvegicus GN=Rbmx PE=1 SV=1 (sp|Q4V898|RBMX_RAT)	sp|Q4V898|RBMX_RAT [3]	42 kDa	1	1.3
Peripheral plasma membrane protein CASK OS=Rattus norvegicus GN=Cask PE=1 SV=1	sp|Q62915|CSKP_RAT	103 kDa	1	1.3
Tubulin-specific chaperone A OS=Rattus norvegicus GN=Tbca PE=1 SV=1	sp|Q6PEC1|TBCA_RAT	13 kDa	1	1.1
Xin actin-binding repeat-containing protein 2 OS=Rattus norvegicus GN=Xirp2 PE=2 SV=1	sp|Q71LX6|XIRP2_RAT	374 kDa	1	0.9
Sphingosine-1-phosphate lyase 1 OS=Rattus norvegicus GN=Sgpl1 PE=2 SV=1	sp|Q8CHN6|SGPL1_RAT	64 kDa	1	1.1
Septin-9 OS=Rattus norvegicus GN=Sept9 PE=1 SV=1	sp|Q9QZR6|SEPT9_RAT	64 kDa	1	1.2
Protein PRRC1 OS=Rattus norvegicus GN=Prrc1 PE=2 SV=1	sp|Q3T1I4|PRRC1_RAT	46 kDa	1	1
Isocitrate dehydrogenase [NAD] subunit gamma 1, mitochondrial OS=Rattus norvegicus GN=Idh3g PE=2 SV=2	sp|P41565|IDHG1_RAT	43 kDa	1	1.1
Biglycan OS=Rattus norvegicus GN=Bgn PE=2 SV=1	sp|P47853|PGS1_RAT	42 kDa	1	0.8
Cluster of Small nuclear ribonucleoprotein-associated protein N OS=Rattus norvegicus GN=Snrpn PE=2 SV=1 (sp|P63164|RSMN_RAT)	sp|P63164|RSMN_RAT [2]	25 kDa	1	1.3
Mitochondrial 2-oxoglutarate/malate carrier protein OS=Rattus norvegicus GN=Slc25a11 PE=2 SV=3	sp|P97700|M2OM_RAT	34 kDa	1	1
SPRY domain-containing protein 4 OS=Rattus norvegicus GN=Spryd4 PE=2 SV=1	sp|Q4FZT8|SPRY4_RAT	23 kDa	1	1.2
Phospholipase B-like 1 OS=Rattus norvegicus GN=Plbd1 PE=2 SV=1	sp|Q5U2V4|PLBL1_RAT	63 kDa	1	1.3
Nuclear migration protein nudC OS=Rattus norvegicus GN=Nudc PE=1 SV=1	sp|Q63525|NUDC_RAT	38 kDa	1	0.9
Cell division control protein 42 homolog OS=Rattus norvegicus GN=Cdc42 PE=1 SV=2	sp|Q8CFN2|CDC42_RAT	21 kDa	1	1
Chloride intracellular channel protein 4 OS=Rattus norvegicus GN=Clic4 PE=1 SV=3	sp|Q9Z0W7|CLIC4_RAT	29 kDa	1	1.1
Heterogeneous nuclear ribonucleoprotein A1 OS=Rattus norvegicus GN=Hnrnpa1 PE=1 SV=3	sp|P04256|ROA1_RAT	34 kDa	1	0.8
Actin-related protein 2/3 complex subunit 5 OS=Rattus norvegicus GN=Arpc5 PE=1 SV=3	sp|Q4KLF8|ARPC5_RAT	16 kDa	1	1
Serine/threonine-protein kinase TAO3 OS=Rattus norvegicus GN=Taok3 PE=2 SV=1	sp|Q53UA7|TAOK3_RAT	105 kDa	1	0.9
Threonine--tRNA ligase, mitochondrial OS=Rattus norvegicus GN=Tars2 PE=2 SV=1	sp|Q68FW7|SYTM_RAT	82 kDa	1	1.2
Cluster of 40S ribosomal protein S27 OS=Rattus norvegicus GN=Rps27 PE=2 SV=3 (sp|Q71TY3|RS27_RAT)	sp|Q71TY3|RS27_RAT [2]	9 kDa	1	1
Protein sel-1 homolog 1 OS=Rattus norvegicus GN=Sel1l PE=2 SV=2	sp|Q80Z70|SE1L1_RAT	89 kDa	1	0.9
Prenylcysteine oxidase OS=Rattus norvegicus GN=Pcyox1 PE=1 SV=1	sp|Q99ML5|PCYOX_RAT	56 kDa	1	0.8
Interleukin enhancer-binding factor 3 OS=Rattus norvegicus GN=Ilf3 PE=1 SV=2	sp|Q9JIL3|ILF3_RAT	96 kDa	1	1.1
Histidine triad nucleotide-binding protein 1 OS=Rattus norvegicus GN=Hint1 PE=1 SV=5	sp|P62959|HINT1_RAT	14 kDa	1	1.1
NADH dehydrogenase [ubiquinone] flavoprotein 3, mitochondrial OS=Rattus norvegicus GN=Ndufv3 PE=3 SV=1	sp|Q6PCU8|NDUV3_RAT	12 kDa	1	0.8
Sodium/potassium-transporting ATPase subunit beta-1 OS=Rattus norvegicus GN=Atp1b1 PE=1 SV=1	sp|P07340|AT1B1_RAT	35 kDa	1	0.8
Proteasome subunit beta type-2 OS=Rattus norvegicus GN=Psmb2 PE=1 SV=1	sp|P40307|PSB2_RAT	23 kDa	1	1.1
Gephyrin OS=Rattus norvegicus GN=Gphn PE=1 SV=3	sp|Q03555|GEPH_RAT	83 kDa	1	1.1
Peptidyl-prolyl cis-trans isomerase FKBP8 OS=Rattus norvegicus GN=Fkbp8 PE=2 SV=1	sp|Q3B7U9|FKBP8_RAT	44 kDa	1	0.9
Protein AMBP OS=Rattus norvegicus GN=Ambp PE=1 SV=1	sp|Q64240|AMBP_RAT	39 kDa	1	0.9
Lambda-crystallin homolog OS=Rattus norvegicus GN=Cryl1 PE=2 SV=3	sp|Q811X6|CRYL1_RAT	35 kDa	1	1.1
Alpha-parvin OS=Rattus norvegicus GN=Parva PE=1 SV=2	sp|Q9HB97|PARVA_RAT	42 kDa	1	1.1
CDK5 regulatory subunit-associated protein 3 OS=Rattus norvegicus GN=Cdk5rap3 PE=1 SV=1	sp|Q9JLH7|CK5P3_RAT	57 kDa	1	1.1
Disabled homolog 2-interacting protein OS=Rattus norvegicus GN=Dab2ip PE=1 SV=1	sp|Q6P730|DAB2P_RAT	110 kDa	1	1.1
ATP synthase subunit g, mitochondrial OS=Rattus norvegicus GN=Atp5l PE=1 SV=2	sp|Q6PDU7|ATP5L_RAT	11 kDa	1	1
UBX domain-containing protein 4 OS=Rattus norvegicus GN=Ubxn4 PE=2 SV=1	sp|Q5HZY0|UBXN4_RAT	56 kDa	1	0.9
Eukaryotic translation initiation factor 3 subunit I OS=Rattus norvegicus GN=Eif3i PE=2 SV=1	sp|B0BNA7|EIF3I_RAT	36 kDa	1	1.2
Clathrin light chain B OS=Rattus norvegicus GN=Cltb PE=1 SV=1	sp|P08082|CLCB_RAT	25 kDa	1	1.1
S-adenosylmethionine synthase isoform type-2 OS=Rattus norvegicus GN=Mat2a PE=1 SV=1	sp|P18298|METK2_RAT	44 kDa	1	1
Tryptophan 2,3-dioxygenase OS=Rattus norvegicus GN=Tdo2 PE=2 SV=1	sp|P21643|T23O_RAT	48 kDa	1	0.8
Glutamyl aminopeptidase OS=Rattus norvegicus GN=Enpep PE=1 SV=2	sp|P50123|AMPE_RAT	108 kDa	1	1
40S ribosomal protein S23 OS=Rattus norvegicus GN=Rps23 PE=2 SV=3	sp|P62268|RS23_RAT	16 kDa	1	1.3
Tyrosine-protein kinase Lyn OS=Rattus norvegicus GN=Lyn PE=1 SV=3	sp|Q07014|LYN_RAT	59 kDa	1	0.9
Eukaryotic translation initiation factor 3 subunit E OS=Rattus norvegicus GN=Eif3e PE=2 SV=1	sp|Q641X8|EIF3E_RAT	52 kDa	1	1.2
Tetratricopeptide repeat protein 36 OS=Rattus norvegicus GN=Ttc36 PE=2 SV=1	sp|Q66H45|TTC36_RAT	20 kDa	1	1.1
Aldose 1-epimerase OS=Rattus norvegicus GN=Galm PE=1 SV=1	sp|Q66HG4|GALM_RAT	38 kDa	1	1.4
Plasminogen activator inhibitor 1 RNA-binding protein OS=Rattus norvegicus GN=Serbp1 PE=1 SV=2	sp|Q6AXS5|PAIRB_RAT	45 kDa	1	1.2
Immunity-related GTPase family M protein OS=Rattus norvegicus GN=Irgm PE=2 SV=1	sp|Q6AYC2|IRGM_RAT	46 kDa	1	1.3
28S ribosomal protein S26, mitochondrial OS=Rattus norvegicus GN=Mrps26 PE=1 SV=1	sp|Q9EPJ3|RT26_RAT	23 kDa	1	1.1
40S ribosomal protein S29 OS=Rattus norvegicus GN=Rps29 PE=1 SV=2	sp|P62275|RS29_RAT	7 kDa	1	1.6
Beta-galactoside alpha-2,6-sialyltransferase 1 OS=Rattus norvegicus GN=St6gal1 PE=1 SV=1	sp|P13721|SIAT1_RAT	47 kDa	1	1.3
Cold shock domain-containing protein E1 OS=Rattus norvegicus GN=Csde1 PE=2 SV=1	sp|P18395|CSDE1_RAT	89 kDa	1	1.1
Ig gamma-2B chain C region OS=Rattus norvegicus GN=Igh-1a PE=1 SV=1	sp|P20761|IGG2B_RAT	36 kDa	1	1.2
Histone H1.0 OS=Rattus norvegicus GN=H1f0 PE=2 SV=2	sp|P43278|H10_RAT	21 kDa	1	1.4
Squalene synthase OS=Rattus norvegicus GN=Fdft1 PE=2 SV=1	sp|Q02769|FDFT_RAT	48 kDa	1	1
Golgin subfamily A member 5 OS=Rattus norvegicus GN=Golga5 PE=1 SV=1	sp|Q3ZU82|GOGA5_RAT	82 kDa	1	1.1
UBX domain-containing protein 1 OS=Rattus norvegicus GN=Ubxn1 PE=2 SV=2	sp|Q499N6|UBXN1_RAT	34 kDa	1	1.2
CD302 antigen OS=Rattus norvegicus GN=Cd302 PE=2 SV=1	sp|Q5FVR3|CD302_RAT	25 kDa	1	0.7
Cluster of Protein SET OS=Rattus norvegicus GN=Set PE=1 SV=2 (sp|Q63945|SET_RAT)	sp|Q63945|SET_RAT [2]	33 kDa	1	0.9
H/ACA ribonucleoprotein complex subunit 1 OS=Rattus norvegicus GN=Gar1 PE=2 SV=1	sp|Q6AYA1|GAR1_RAT	23 kDa	1	1.2
Ras-related C3 botulinum toxin substrate 1 OS=Rattus norvegicus GN=Rac1 PE=1 SV=1	sp|Q6RUV5|RAC1_RAT	21 kDa	1	1
Acidic leucine-rich nuclear phosphoprotein 32 family member B OS=Rattus norvegicus GN=Anp32b PE=2 SV=1	sp|Q9EST6|AN32B_RAT	31 kDa	1	1.3
DNA repair protein RAD50 OS=Rattus norvegicus GN=Rad50 PE=1 SV=1	sp|Q9JIL8|RAD50_RAT	154 kDa	1	1.3
26S proteasome non-ATPase regulatory subunit 9 OS=Rattus norvegicus GN=Psmd9 PE=1 SV=1	sp|Q9WTV5|PSMD9_RAT	25 kDa	1	1.1
Intersectin-1 OS=Rattus norvegicus GN=Itsn1 PE=1 SV=1	sp|Q9WVE9|ITSN1_RAT	137 kDa	1	1.4
Breast cancer type 2 susceptibility protein homolog OS=Rattus norvegicus GN=Brca2 PE=1 SV=1	sp|O35923|BRCA2_RAT	372 kDa	1	0.9
Clathrin light chain A OS=Rattus norvegicus GN=Clta PE=1 SV=1	sp|P08081|CLCA_RAT	27 kDa	1	1.1
rRNA 2'-O-methyltransferase fibrillarin OS=Rattus norvegicus GN=Fbl PE=1 SV=2	sp|P22509|FBRL_RAT	34 kDa	1	1.1
Guanine nucleotide-binding protein G(I)/G(S)/G(T) subunit beta-2 OS=Rattus norvegicus GN=Gnb2 PE=1 SV=4	sp|P54313|GBB2_RAT	37 kDa	1	1
Acyl-protein thioesterase 1 OS=Rattus norvegicus GN=Lypla1 PE=1 SV=1	sp|P70470|LYPA1_RAT	25 kDa	1	1.1
Nucleolar RNA helicase 2 OS=Rattus norvegicus GN=Ddx21 PE=2 SV=1	sp|Q3B8Q1|DDX21_RAT	86 kDa	1	1.2
Protein phosphatase 1 regulatory subunit 7 OS=Rattus norvegicus GN=Ppp1r7 PE=1 SV=1	sp|Q5HZV9|PP1R7_RAT	41 kDa	1	1
1,5-anhydro-D-fructose reductase OS=Rattus norvegicus GN=Akr1e2 PE=2 SV=1	sp|Q5U1Y4|AKCL2_RAT	35 kDa	1	1.1
Serine-threonine kinase receptor-associated protein OS=Rattus norvegicus GN=Strap PE=1 SV=1	sp|Q5XIG8|STRAP_RAT	38 kDa	1	1.1
Hexaprenyldihydroxybenzoate methyltransferase, mitochondrial OS=Rattus norvegicus GN=Coq3 PE=2 SV=2	sp|Q63159|COQ3_RAT	39 kDa	1	1.3
Protein LYRIC OS=Rattus norvegicus GN=Mtdh PE=1 SV=2	sp|Q9Z1W6|LYRIC_RAT	64 kDa	1	1.1
Thyroid hormone receptor-associated protein 3 OS=Rattus norvegicus GN=Thrap3 PE=1 SV=1	sp|Q5M7V8|TR150_RAT	108 kDa	1	0.9
Inosine triphosphate pyrophosphatase OS=Rattus norvegicus GN=Itpa PE=3 SV=1	sp|D3ZW55|ITPA_RAT	22 kDa	1	1
Cluster of Solute carrier organic anion transporter family member 1A4 OS=Rattus norvegicus GN=Slco1a4 PE=2 SV=1 (sp|O35913|SO1A4_RAT)	sp|O35913|SO1A4_RAT [4]	73 kDa	1	1.1
Glutathione S-transferase P OS=Rattus norvegicus GN=Gstp1 PE=1 SV=2	sp|P04906|GSTP1_RAT	23 kDa	1	1.2
Protein phosphatase 1A OS=Rattus norvegicus GN=Ppm1a PE=1 SV=1	sp|P20650|PPM1A_RAT	42 kDa	1	1.1
Lysosome membrane protein 2 OS=Rattus norvegicus GN=Scarb2 PE=1 SV=2	sp|P27615|SCRB2_RAT	54 kDa	1	1.1
Cluster of Guanine nucleotide-binding protein G(I)/G(S)/G(T) subunit beta-1 OS=Rattus norvegicus GN=Gnb1 PE=1 SV=4 (sp|P54311|GBB1_RAT)	sp|P54311|GBB1_RAT	37 kDa	1	0.8
Di-N-acetylchitobiase OS=Rattus norvegicus GN=Ctbs PE=1 SV=1	sp|Q01460|DIAC_RAT	42 kDa	1	1.1
Eukaryotic translation initiation factor 5 OS=Rattus norvegicus GN=Eif5 PE=1 SV=1	sp|Q07205|IF5_RAT	49 kDa	1	1.2
Prostaglandin reductase 2 OS=Rattus norvegicus GN=Ptgr2 PE=2 SV=2	sp|Q5BK81|PTGR2_RAT	38 kDa	1	1.3
Alpha-N-acetylgalactosaminidase OS=Rattus norvegicus GN=Naga PE=2 SV=1	sp|Q66H12|NAGAB_RAT	47 kDa	1	1.1
Vacuolar protein sorting-associated protein 26A OS=Rattus norvegicus GN=Vps26a PE=2 SV=1	sp|Q6AY86|VP26A_RAT	38 kDa	1	1
Far upstream element-binding protein 2 OS=Rattus norvegicus GN=Khsrp PE=1 SV=1	sp|Q99PF5|FUBP2_RAT	74 kDa	1	1.1
Cluster of Retinoic acid receptor RXR-alpha OS=Rattus norvegicus GN=Rxra PE=2 SV=1 (sp|Q05343|RXRA_RAT)	sp|Q05343|RXRA_RAT	51 kDa	1	1
Ras-related protein Rab-21 OS=Rattus norvegicus GN=Rab21 PE=2 SV=1	sp|Q6AXT5|RAB21_RAT	24 kDa	1	1
Mitochondrial nucleoid factor 1 OS=Rattus norvegicus GN=Mnf1 PE=2 SV=1	sp|B5DFN3|MNF1_RAT	16 kDa	1	0.8
Cell division cycle 5-like protein OS=Rattus norvegicus GN=Cdc5l PE=1 SV=2	sp|O08837|CDC5L_RAT	92 kDa	1	1
Pyridoxine-5'-phosphate oxidase OS=Rattus norvegicus GN=Pnpo PE=1 SV=1	sp|O88794|PNPO_RAT	30 kDa	1	1
Sepiapterin reductase OS=Rattus norvegicus GN=Spr PE=1 SV=1	sp|P18297|SPRE_RAT	28 kDa	1	1.2
Uroporphyrinogen decarboxylase (Fragment) OS=Rattus norvegicus GN=Urod PE=1 SV=1	sp|P32362|DCUP_RAT	40 kDa	1	0.9
Transcriptional activator protein Pur-alpha (Fragments) OS=Rattus norvegicus GN=Pura PE=1 SV=1	sp|P86252|PURA_RAT	15 kDa	1	1
Cyclin-G-associated kinase OS=Rattus norvegicus GN=Gak PE=2 SV=1	sp|P97874|GAK_RAT	144 kDa	1	1.3
Glutathione S-transferase theta-1 OS=Rattus norvegicus GN=Gstt1 PE=1 SV=2	sp|Q01579|GSTT1_RAT	27 kDa	1	1.2
2-methoxy-6-polyprenyl-1,4-benzoquinol methylase, mitochondrial OS=Rattus norvegicus GN=Coq5 PE=2 SV=1	sp|Q4G064|COQ5_RAT	37 kDa	1	0.9
ATPase family AAA domain-containing protein 1 OS=Rattus norvegicus GN=Atad1 PE=1 SV=1	sp|Q505J9|ATAD1_RAT	41 kDa	1	0.8
1,2-dihydroxy-3-keto-5-methylthiopentene dioxygenase OS=Rattus norvegicus GN=Adi1 PE=2 SV=1	sp|Q562C9|MTND_RAT	21 kDa	1	0.9
OCIA domain-containing protein 1 OS=Rattus norvegicus GN=Ociad1 PE=2 SV=1	sp|Q5XIG4|OCAD1_RAT	28 kDa	1	1
Probable ATP-dependent RNA helicase DDX46 OS=Rattus norvegicus GN=Ddx46 PE=1 SV=1	sp|Q62780|DDX46_RAT	117 kDa	1	0.9
C4b-binding protein alpha chain OS=Rattus norvegicus GN=C4bpa PE=2 SV=1	sp|Q63514|C4BPA_RAT	62 kDa	1	0.9
Calcineurin-like phosphoesterase domain-containing protein 1 OS=Rattus norvegicus GN=Cpped1 PE=2 SV=1	sp|Q66H71|CPPED_RAT	35 kDa	1	0.9
COP9 signalosome complex subunit 4 OS=Rattus norvegicus GN=Cops4 PE=2 SV=1	sp|Q68FS2|CSN4_RAT	46 kDa	1	1.2
Carbonyl reductase family member 4 OS=Rattus norvegicus GN=Cbr4 PE=2 SV=1	sp|Q7TS56|CBR4_RAT	25 kDa	1	1.2
ERO1-like protein alpha OS=Rattus norvegicus GN=Ero1l PE=1 SV=1	sp|Q8R4A1|ERO1A_RAT	54 kDa	1	1.3
Mitochondrial import inner membrane translocase subunit Tim8 A OS=Rattus norvegicus GN=Timm8a PE=1 SV=1	sp|Q9WVA1|TIM8A_RAT	11 kDa	1	1
Extended synaptotagmin-1 OS=Rattus norvegicus GN=Esyt1 PE=2 SV=1	sp|Q9Z1X1|ESYT1_RAT	121 kDa	1	1.1
Probable ATP-dependent RNA helicase DDX4 OS=Rattus norvegicus GN=Ddx4 PE=2 SV=1	sp|Q64060|DDX4_RAT	78 kDa	1	0.8
Single-stranded DNA-binding protein, mitochondrial OS=Rattus norvegicus GN=Ssbp1 PE=1 SV=2	sp|P28042|SSBP_RAT	17 kDa	1	0.9
Cytochrome P450 2C55 OS=Rattus norvegicus GN=Cyp2c55 PE=2 SV=2	sp|P33273|CP255_RAT	56 kDa	1	1
Cluster of Mitogen-activated protein kinase 9 OS=Rattus norvegicus GN=Mapk9 PE=1 SV=1 (sp|P49186|MK09_RAT)	sp|P49186|MK09_RAT [3]	48 kDa	1	1.1
ADP-ribosylation factor GTPase-activating protein 2 OS=Rattus norvegicus GN=Arfgap2 PE=2 SV=1	sp|Q3MID3|ARFG2_RAT	57 kDa	1	1.1
Coiled-coil domain-containing protein 90B, mitochondrial OS=Rattus norvegicus GN=Ccdc90b PE=2 SV=1	sp|Q4V897|CC90B_RAT	30 kDa	1	0.8
Sec1 family domain-containing protein 1 OS=Rattus norvegicus GN=Scfd1 PE=1 SV=1	sp|Q62991|SCFD1_RAT	72 kDa	1	0.8
ADP-ribosylation factor-like protein 8B OS=Rattus norvegicus GN=Arl8b PE=2 SV=1	sp|Q66HA6|ARL8B_RAT	22 kDa	1	1
Tumor protein D54 OS=Rattus norvegicus GN=Tpd52l2 PE=2 SV=1	sp|Q6PCT3|TPD54_RAT	24 kDa	1	0.9
Prolactin regulatory element-binding protein OS=Rattus norvegicus GN=Preb PE=2 SV=2	sp|Q9WTV0|PREB_RAT	45 kDa	1	1.2
Coiled-coil and C2 domain-containing protein 1B OS=Rattus norvegicus GN=Cc2d1b PE=1 SV=2	sp|Q5FVK6|C2D1B_RAT	94 kDa	1	1
IgG receptor FcRn large subunit p51 OS=Rattus norvegicus GN=Fcgrt PE=1 SV=1	sp|P13599|FCGRN_RAT	40 kDa	1	0.9
Histone H2A.Z OS=Rattus norvegicus GN=H2afz PE=1 SV=2	sp|P0C0S7|H2AZ_RAT	14 kDa	1	1.1
NSFL1 cofactor p47 OS=Rattus norvegicus GN=Nsfl1c PE=1 SV=1	sp|O35987|NSF1C_RAT	41 kDa	1	1
60S acidic ribosomal protein P1 OS=Rattus norvegicus GN=Rplp1 PE=3 SV=1	sp|P19944|RLA1_RAT	11 kDa	1	0.7
Proteasome subunit beta type-9 OS=Rattus norvegicus GN=Psmb9 PE=1 SV=2	sp|P28077|PSB9_RAT	23 kDa	1	1
Casein kinase II subunit beta OS=Rattus norvegicus GN=Csnk2b PE=1 SV=1	sp|P67874|CSK2B_RAT	25 kDa	1	0.9
Alpha-1,3-mannosyl-glycoprotein 2-beta-N-acetylglucosaminyltransferase OS=Rattus norvegicus GN=Mgat1 PE=2 SV=1	sp|Q09325|MGAT1_RAT	52 kDa	1	1
Kinesin-1 heavy chain OS=Rattus norvegicus GN=Kif5b PE=2 SV=1	sp|Q2PQA9|KINH_RAT	110 kDa	1	1
Lysophospholipid acyltransferase 5 OS=Rattus norvegicus GN=Lpcat3 PE=2 SV=1	sp|Q5FVN0|MBOA5_RAT	56 kDa	1	1.4
Eukaryotic translation initiation factor 3 subunit G OS=Rattus norvegicus GN=Eif3g PE=2 SV=1	sp|Q5RK09|EIF3G_RAT	36 kDa	1	1.1
DDB1- and CUL4-associated factor 8 OS=Rattus norvegicus GN=Dcaf8 PE=2 SV=1	sp|Q5U2M6|DCAF8_RAT	66 kDa	1	0.9
SUMO-activating enzyme subunit 1 OS=Rattus norvegicus GN=Sae1 PE=2 SV=1	sp|Q6AXQ0|SAE1_RAT	39 kDa	1	1.2
Echinoderm microtubule-associated protein-like 2 OS=Rattus norvegicus GN=Eml2 PE=1 SV=1	sp|Q6P6T4|EMAL2_RAT	71 kDa	1	1.4
Hepatoma-derived growth factor OS=Rattus norvegicus GN=Hdgf PE=1 SV=2	sp|Q8VHK7|HDGF_RAT	26 kDa	1	1.1
NEDD8-activating enzyme E1 catalytic subunit OS=Rattus norvegicus GN=Uba3 PE=1 SV=1	sp|Q99MI7|UBA3_RAT	52 kDa	1	1
Nucleolar protein 58 OS=Rattus norvegicus GN=Nop58 PE=1 SV=1	sp|Q9QZ86|NOP58_RAT	60 kDa	1	1.3
Phosphoinositide 3-kinase regulatory subunit 4 OS=Rattus norvegicus GN=Pik3r4 PE=3 SV=2	sp|P0C0R5|PI3R4_RAT	152 kDa	1	0.9
Ubiquitin-conjugating enzyme E2 variant 2 OS=Rattus norvegicus GN=Ube2v2 PE=1 SV=3	sp|Q7M767|UB2V2_RAT	16 kDa	1	1
Barrier-to-autointegration factor OS=Rattus norvegicus GN=Banf1 PE=1 SV=1	sp|Q9R1T1|BAF_RAT	10 kDa	1	0.8
Inositol 1,4,5-trisphosphate receptor type 3 OS=Rattus norvegicus GN=Itpr3 PE=1 SV=1	sp|Q63269|ITPR3_RAT	304 kDa	1	1.2
Sialate O-acetylesterase OS=Rattus norvegicus GN=Siae PE=1 SV=2	sp|P82450|SIAE_RAT	60 kDa	1	1
Acyl-CoA-binding domain-containing protein 5 OS=Rattus norvegicus GN=Acbd5 PE=1 SV=1	sp|A0FKI7|ACBD5_RAT	57 kDa	1	0.8
Chitinase domain-containing protein 1 OS=Rattus norvegicus GN=Chid1 PE=2 SV=2	sp|A0JPQ9|CHID1_RAT	45 kDa	1	0.7
Coiled-coil-helix-coiled-coil-helix domain-containing protein 6, mitochondrial OS=Rattus norvegicus GN=Chchd6 PE=3 SV=1	sp|D4A7N1|CHCH6_RAT	29 kDa	1	1.1
Nuclear pore complex protein Nup88 OS=Rattus norvegicus GN=Nup88 PE=1 SV=1	sp|O08658|NUP88_RAT	84 kDa	1	0.8
Coronin-1B OS=Rattus norvegicus GN=Coro1b PE=1 SV=1	sp|O89046|COR1B_RAT	54 kDa	1	1.2
Cluster of Arylamine N-acetyltransferase 1 OS=Rattus norvegicus GN=Nat1 PE=2 SV=1 (sp|P50297|ARY1_RAT)	sp|P50297|ARY1_RAT [2]	33 kDa	1	1
14-3-3 protein theta OS=Rattus norvegicus GN=Ywhaq PE=1 SV=1	sp|P68255|1433T_RAT	28 kDa	1	1.1
5'-AMP-activated protein kinase subunit gamma-1 OS=Rattus norvegicus GN=Prkag1 PE=1 SV=3	sp|P80385|AAKG1_RAT	37 kDa	1	0.9
Multidrug resistance protein 3 OS=Rattus norvegicus GN=Abcb4 PE=1 SV=1	sp|Q08201|MDR3_RAT	141 kDa	1	1.3
Ubiquinone biosynthesis monooxygenase COQ6 OS=Rattus norvegicus GN=Coq6 PE=2 SV=1	sp|Q68FU7|COQ6_RAT	51 kDa	1	1
39S ribosomal protein L37, mitochondrial OS=Rattus norvegicus GN=Mrpl37 PE=2 SV=1	sp|Q6AXT0|RM37_RAT	48 kDa	1	0.9
Eukaryotic translation initiation factor 3 subunit H OS=Rattus norvegicus GN=Eif3h PE=2 SV=1	sp|Q6P9U8|EIF3H_RAT	40 kDa	1	1.2
Elongation factor Ts, mitochondrial OS=Rattus norvegicus GN=Tsfm PE=2 SV=1	sp|Q9QYU2|EFTS_RAT	35 kDa	1	0.9
Cluster of Complement factor I OS=Rattus norvegicus GN=Cfi PE=2 SV=1 (sp|Q9WUW3|CFAI_RAT)	sp|Q9WUW3|CFAI_RAT [2]	67 kDa	1	0.9
Cysteine-rich protein 2 OS=Rattus norvegicus GN=Crip2 PE=2 SV=1	sp|P36201|CRIP2_RAT	23 kDa	1	1.2
Calpain small subunit 1 OS=Rattus norvegicus GN=Capns1 PE=1 SV=3	sp|Q64537|CPNS1_RAT	29 kDa	1	1.1
Beta-2-microglobulin OS=Rattus norvegicus GN=B2m PE=1 SV=1	sp|P07151|B2MG_RAT	14 kDa	1	1
Tyrosine-protein kinase CSK OS=Rattus norvegicus GN=Csk PE=1 SV=1	sp|P32577|CSK_RAT	51 kDa	1	0.8
Peroxisomal targeting signal 1 receptor OS=Rattus norvegicus GN=Pex5 PE=1 SV=2	sp|Q2M2R8|PEX5_RAT	71 kDa	1	0.9
Transmembrane 9 superfamily member 4 OS=Rattus norvegicus GN=Tm9sf4 PE=2 SV=1	sp|Q4KLL4|TM9S4_RAT	75 kDa	1	0.9
Caprin-1 OS=Rattus norvegicus GN=Caprin1 PE=1 SV=2	sp|Q5M9G3|CAPR1_RAT	78 kDa	1	1
Dihydroorotate dehydrogenase (quinone), mitochondrial OS=Rattus norvegicus GN=Dhodh PE=1 SV=1	sp|Q63707|PYRD_RAT	43 kDa	1	1
Cation-dependent mannose-6-phosphate receptor OS=Rattus norvegicus GN=M6pr PE=2 SV=1	sp|Q6AY20|MPRD_RAT	31 kDa	1	1
Basic leucine zipper and W2 domain-containing protein 1 OS=Rattus norvegicus GN=Bzw1 PE=2 SV=1	sp|Q6P7P5|BZW1_RAT	48 kDa	1	0.9
Mitochondrial import inner membrane translocase subunit Tim23 OS=Rattus norvegicus GN=Timm23 PE=2 SV=1	sp|O35093|TIM23_RAT	22 kDa	1	1
Heparin cofactor 2 OS=Rattus norvegicus GN=Serpind1 PE=2 SV=1	sp|Q64268|HEP2_RAT	55 kDa	1	1
Receptor expression-enhancing protein 6 OS=Rattus norvegicus GN=Reep6 PE=2 SV=1	sp|Q5XI60|REEP6_RAT	23 kDa	1	1
Collagen alpha-1(V) chain OS=Rattus norvegicus GN=Col5a1 PE=1 SV=1	sp|Q9JI03|CO5A1_RAT	184 kDa	1	0.9
Pyrroline-5-carboxylate reductase 3 OS=Rattus norvegicus GN=Pycrl PE=2 SV=1	sp|Q5PQJ6|P5CR3_RAT	29 kDa	1	0.8
Phosphorylase b kinase regulatory subunit alpha, skeletal muscle isoform OS=Rattus norvegicus GN=Phka1 PE=2 SV=2	sp|Q64649|KPB1_RAT	139 kDa	1	0.9
Vacuolar protein sorting-associated protein 29 OS=Rattus norvegicus GN=Vps29 PE=1 SV=2	sp|B2RZ78|VPS29_RAT	20 kDa	1	1.1
Rab GTPase-binding effector protein 1 OS=Rattus norvegicus GN=Rabep1 PE=1 SV=1	sp|O35550|RABE1_RAT	99 kDa	1	1.1
Growth factor receptor-bound protein 14 OS=Rattus norvegicus GN=Grb14 PE=2 SV=1	sp|O88900|GRB14_RAT	61 kDa	1	1
60S ribosomal protein L35 OS=Rattus norvegicus GN=Rpl35 PE=1 SV=3	sp|P17078|RL35_RAT	15 kDa	1	1.6
Nck-associated protein 1 OS=Rattus norvegicus GN=Nckap1 PE=2 SV=1	sp|P55161|NCKP1_RAT	129 kDa	1	1
Platelet-activating factor acetylhydrolase IB subunit alpha OS=Rattus norvegicus GN=Pafah1b1 PE=1 SV=2	sp|P63004|LIS1_RAT	47 kDa	1	0.9
Heterochromatin protein 1-binding protein 3 OS=Rattus norvegicus GN=Hp1bp3 PE=2 SV=1	sp|Q6P747|HP1B3_RAT	61 kDa	1	1.4
Starch-binding domain-containing protein 1 OS=Rattus norvegicus GN=Stbd1 PE=1 SV=1	sp|Q5FVN1|STBD1_RAT	35 kDa	1	0.8
40S ribosomal protein S21 OS=Rattus norvegicus GN=Rps21 PE=1 SV=1	sp|P05765|RS21_RAT	9 kDa	1	1.2
Transmembrane protein 97 OS=Rattus norvegicus GN=Tmem97 PE=2 SV=1	sp|Q5U3Y7|TMM97_RAT	21 kDa	1	1
THO complex subunit 5 homolog OS=Rattus norvegicus GN=Thoc5 PE=2 SV=1	sp|Q68FX7|THOC5_RAT	79 kDa	1	1
Transmembrane protein 214 OS=Rattus norvegicus GN=Tmem214 PE=2 SV=1	sp|A1L1L2|TM214_RAT	77 kDa	1	1.1
Protein QN1 homolog OS=Rattus norvegicus GN=Qn1 PE=1 SV=2	sp|Q4KLH6|QN1_RAT	161 kDa	1	1.1
NAD(P)H-hydrate epimerase OS=Rattus norvegicus GN=Apoa1bp PE=2 SV=1	sp|B0BNM1|NNRE_RAT	31 kDa	1	1.2
Scaffold attachment factor B1 OS=Rattus norvegicus GN=Safb PE=1 SV=2	sp|O88453|SAFB1_RAT	105 kDa	1	0.8
Band 3 anion transport protein OS=Rattus norvegicus GN=Slc4a1 PE=2 SV=3	sp|P23562|B3AT_RAT	103 kDa	1	1.1
Antigen peptide transporter 2 OS=Rattus norvegicus GN=Tap2 PE=2 SV=1	sp|P36372|TAP2_RAT	78 kDa	1	1.1
Cluster of cAMP-dependent protein kinase catalytic subunit beta OS=Rattus norvegicus GN=Prkacb PE=1 SV=2 (sp|P68182|KAPCB_RAT)	sp|P68182|KAPCB_RAT [2]	41 kDa	1	1
AMP deaminase 2 OS=Rattus norvegicus GN=Ampd2 PE=2 SV=2	sp|Q02356|AMPD2_RAT	95 kDa	1	0.9
Interferon-induced, double-stranded RNA-activated protein kinase OS=Rattus norvegicus GN=Eif2ak2 PE=1 SV=1	sp|Q63184|E2AK2_RAT	58 kDa	1	1.1
Transmembrane 9 superfamily member 2 OS=Rattus norvegicus GN=Tm9sf2 PE=2 SV=1	sp|Q66HG5|TM9S2_RAT	76 kDa	1	0.8
Beta-hexosaminidase subunit beta OS=Rattus norvegicus GN=Hexb PE=2 SV=1	sp|Q6AXR4|HEXB_RAT	62 kDa	1	1.1
Protein transport protein Sec16B OS=Rattus norvegicus GN=Sec16b PE=2 SV=1	sp|Q75N33|SC16B_RAT	117 kDa	1	1.1
Protein VAC14 homolog OS=Rattus norvegicus GN=Vac14 PE=1 SV=1	sp|Q80W92|VAC14_RAT	88 kDa	1	1.1
Fetuin-B OS=Rattus norvegicus GN=Fetub PE=2 SV=1	sp|Q9QX79|FETUB_RAT	42 kDa	1	1.1
39S ribosomal protein L24, mitochondrial OS=Rattus norvegicus GN=Mrpl24 PE=2 SV=1	sp|Q66H47|RM24_RAT	25 kDa	1	0.8
Nuclear factor 1 A-type OS=Rattus norvegicus GN=Nfia PE=1 SV=2	sp|P09414|NFIA_RAT	56 kDa	1	1
60S ribosomal protein L34 OS=Rattus norvegicus GN=Rpl34 PE=1 SV=3	sp|P11250|RL34_RAT	14 kDa	1	1.8
Translocon-associated protein subunit gamma OS=Rattus norvegicus GN=Ssr3 PE=1 SV=2	sp|Q08013|SSRG_RAT	21 kDa	1	1
Exocyst complex component 5 OS=Rattus norvegicus GN=Exoc5 PE=1 SV=1	sp|P97878|EXOC5_RAT	82 kDa	1	1
Dynein light chain 2, cytoplasmic OS=Rattus norvegicus GN=Dynll2 PE=1 SV=1	sp|Q78P75|DYL2_RAT	10 kDa	1	1.1
CLIP-associating protein 2 OS=Rattus norvegicus GN=Clasp2 PE=2 SV=1	sp|Q99JD4|CLAP2_RAT	141 kDa	1	1
Reticulon-3 OS=Rattus norvegicus GN=Rtn3 PE=1 SV=1	sp|Q6RJR6|RTN3_RAT	102 kDa	1	1.1
Proteasome subunit beta type-6 OS=Rattus norvegicus GN=Psmb6 PE=1 SV=3	sp|P28073|PSB6_RAT	25 kDa	1	1.1
Inositol monophosphatase 1 OS=Rattus norvegicus GN=Impa1 PE=1 SV=2	sp|P97697|IMPA1_RAT	31 kDa	1	1
COP9 signalosome complex subunit 1 OS=Rattus norvegicus GN=Gps1 PE=1 SV=1	sp|P97834|CSN1_RAT	53 kDa	1	1.1
Eukaryotic translation initiation factor 6 OS=Rattus norvegicus GN=Eif6 PE=2 SV=1	sp|Q3KRD8|IF6_RAT	27 kDa	1	0.9
Ribosome maturation protein SBDS OS=Rattus norvegicus GN=Sbds PE=2 SV=1	sp|Q5RK30|SBDS_RAT	29 kDa	1	1.1
UPF0598 protein C8orf82 homolog OS=Rattus norvegicus PE=2 SV=1	sp|Q642A4|CH082_RAT	24 kDa	1	1.1
Keratin, type II cytoskeletal 1 OS=Rattus norvegicus GN=Krt1 PE=2 SV=1	sp|Q6IMF3|K2C1_RAT	65 kDa	1	0.8
Estradiol 17-beta-dehydrogenase 8 OS=Rattus norvegicus GN=Hsd17b8 PE=2 SV=1	sp|Q6MGB5|DHB8_RAT	27 kDa	1	1.1
Actin-related protein 2/3 complex subunit 1A OS=Rattus norvegicus GN=Arpc1a PE=2 SV=1	sp|Q99PD4|ARC1A_RAT	42 kDa	1	1
Dihydroxyacetone phosphate acyltransferase OS=Rattus norvegicus GN=Gnpat PE=2 SV=1	sp|Q9ES71|GNPAT_RAT	77 kDa	1	0.8
Ras-related protein Rab-6A OS=Rattus norvegicus GN=Rab6a PE=2 SV=2	sp|Q9WVB1|RAB6A_RAT	24 kDa	1	0.9
Growth hormone-inducible transmembrane protein OS=Rattus norvegicus GN=Ghitm PE=2 SV=1	sp|Q5XIA8|GHITM_RAT	37 kDa	1	0.9
Dynein heavy chain 1, axonemal OS=Rattus norvegicus GN=Dnah1 PE=2 SV=2	sp|Q63164|DYH1_RAT	515 kDa	1	1.1
Copper-transporting ATPase 2 OS=Rattus norvegicus GN=Atp7b PE=2 SV=1	sp|Q64535|ATP7B_RAT	156 kDa	1	0.8
Hepatic triacylglycerol lipase OS=Rattus norvegicus GN=Lipc PE=2 SV=2	sp|P07867|LIPC_RAT	56 kDa	1	0.8
Ephexin-1 OS=Rattus norvegicus GN=Ngef PE=1 SV=2	sp|Q5BKC9|NGEF_RAT	81 kDa	1	1
60S ribosomal protein L29 OS=Rattus norvegicus GN=Rpl29 PE=1 SV=3	sp|P25886|RL29_RAT	17 kDa	1	1.7
UPF0723 protein C11orf83 homolog OS=Rattus norvegicus PE=3 SV=1	sp|P0CD94|CK083_RAT	10 kDa	1	0.8
Cluster of Procollagen-lysine,2-oxoglutarate 5-dioxygenase 3 OS=Rattus norvegicus GN=Plod3 PE=2 SV=1 (sp|Q5U367|PLOD3_RAT)	sp|Q5U367|PLOD3_RAT [2]	85 kDa	1	0.9
Procollagen-lysine,2-oxoglutarate 5-dioxygenase 2 OS=Rattus norvegicus GN=Plod2 PE=2 SV=1	sp|Q811A3|PLOD2_RAT	85 kDa	1	1.1
Procollagen-lysine,2-oxoglutarate 5-dioxygenase 3 OS=Rattus norvegicus GN=Plod3 PE=2 SV=1	sp|Q5U367|PLOD3_RAT	85 kDa	1	0.7
Ubiquitin-fold modifier 1 OS=Rattus norvegicus GN=Ufm1 PE=2 SV=1	sp|Q5BJP3|UFM1_RAT	9 kDa	1	1.1
F-actin-capping protein subunit alpha-1 OS=Rattus norvegicus GN=Capza1 PE=1 SV=1	sp|B2GUZ5|CAZA1_RAT	33 kDa	1	1
Heat shock 70 kDa protein 13 OS=Rattus norvegicus GN=Hspa13 PE=2 SV=2	sp|O35162|HSP13_RAT	52 kDa	1	0.8
Cluster of Cytochrome P450 2B2 OS=Rattus norvegicus GN=Cyp2b2 PE=1 SV=2 (sp|P04167|CP2B2_RAT)	sp|P04167|CP2B2_RAT	56 kDa	1	1.2
2',3'-cyclic-nucleotide 3'-phosphodiesterase OS=Rattus norvegicus GN=Cnp PE=1 SV=2	sp|P13233|CN37_RAT	47 kDa	1	1
Cluster of Choline-phosphate cytidylyltransferase A OS=Rattus norvegicus GN=Pcyt1a PE=1 SV=2 (sp|P19836|PCY1A_RAT)	sp|P19836|PCY1A_RAT [2]	42 kDa	1	0.8
3-oxo-5-alpha-steroid 4-dehydrogenase 1 OS=Rattus norvegicus GN=Srd5a1 PE=1 SV=2	sp|P24008|S5A1_RAT	30 kDa	1	1.5
Cytochrome P450 3A9 OS=Rattus norvegicus GN=Cyp3a9 PE=2 SV=2	sp|P51538|CP3A9_RAT	58 kDa	1	1.2
Cytochrome P450 2J3 OS=Rattus norvegicus GN=Cyp2j3 PE=2 SV=1	sp|P51590|CP2J3_RAT	58 kDa	1	0.9
Signal transducer and activator of transcription 5B OS=Rattus norvegicus GN=Stat5b PE=2 SV=1	sp|P52632|STA5B_RAT	90 kDa	1	1.1
PDZ and LIM domain protein 1 OS=Rattus norvegicus GN=Pdlim1 PE=2 SV=4	sp|P52944|PDLI1_RAT	36 kDa	1	1
Monocarboxylate transporter 1 OS=Rattus norvegicus GN=Slc16a1 PE=1 SV=1	sp|P53987|MOT1_RAT	53 kDa	1	0.9
Coiled-coil domain-containing protein 22 OS=Rattus norvegicus GN=Ccdc22 PE=1 SV=2	sp|P86182|CCD22_RAT	71 kDa	1	1.4
Nuclear pore complex protein Nup85 OS=Rattus norvegicus GN=Nup85 PE=2 SV=1	sp|Q4QQS8|NUP85_RAT	75 kDa	1	0.9
GMP synthase [glutamine-hydrolyzing] OS=Rattus norvegicus GN=Gmps PE=1 SV=1	sp|Q4V7C6|GUAA_RAT	77 kDa	1	1
Transgelin-2 OS=Rattus norvegicus GN=Tagln2 PE=1 SV=1	sp|Q5XFX0|TAGL2_RAT	22 kDa	1	1.1
Serine/threonine-protein phosphatase 6 catalytic subunit OS=Rattus norvegicus GN=Ppp6c PE=2 SV=2	sp|Q64620|PPP6_RAT	35 kDa	1	1.1
Acid ceramidase OS=Rattus norvegicus GN=Asah1 PE=2 SV=1	sp|Q6P7S1|ASAH1_RAT	44 kDa	1	0.9
Heterogeneous nuclear ribonucleoprotein D-like OS=Rattus norvegicus GN=Hnrpdl PE=2 SV=1	sp|Q3SWU3|HNRDL_RAT	35 kDa	1	1
Aldose reductase-related protein 1 OS=Rattus norvegicus GN=Akr1b7 PE=1 SV=1	sp|Q5RJP0|ALD1_RAT	36 kDa	1	1.2
Protein phosphatase 1B OS=Rattus norvegicus GN=Ppm1b PE=2 SV=1	sp|P35815|PPM1B_RAT	43 kDa	1	1.1
40S ribosomal protein S24 OS=Rattus norvegicus GN=Rps24 PE=2 SV=1	sp|P62850|RS24_RAT	15 kDa	1	1.1
Alpha-centractin OS=Rattus norvegicus GN=Actr1a PE=1 SV=1	sp|P85515|ACTZ_RAT	43 kDa	1	0.9
ADP-ribosylation factor-like protein 2 OS=Rattus norvegicus GN=Arl2 PE=1 SV=1	sp|O08697|ARL2_RAT	21 kDa	1	1
Arginine and glutamate-rich protein 1 OS=Rattus norvegicus GN=Arglu1 PE=2 SV=1	sp|Q5BJT0|ARGL1_RAT	33 kDa	1	1.4
Phosphatidate cytidylyltransferase 2 OS=Rattus norvegicus GN=Cds2 PE=2 SV=1	sp|Q91XU8|CDS2_RAT	51 kDa	1	1.1
Poly(U)-binding-splicing factor PUF60 OS=Rattus norvegicus GN=Puf60 PE=2 SV=2	sp|Q9WV25|PUF60_RAT	60 kDa	1	0.8
60S ribosomal protein L38 OS=Rattus norvegicus GN=Rpl38 PE=1 SV=2	sp|P63174|RL38_RAT	8 kDa	1	1.2
Cluster of Granzyme-like protein 2 OS=Rattus norvegicus GN=Mcpt10 PE=2 SV=1 (sp|Q06606|GRZ2_RAT)	sp|Q06606|GRZ2_RAT	27 kDa	1	1.1
Granzyme-like protein 2 OS=Rattus norvegicus GN=Mcpt10 PE=2 SV=1	sp|Q06606|GRZ2_RAT	27 kDa	1	1.1
Sodium channel and clathrin linker 1 OS=Rattus norvegicus GN=Sclt1 PE=1 SV=1	sp|Q8CJ99|SCLT1_RAT	80 kDa	1	1.6
Netrin-1 OS=Rattus norvegicus GN=Ntn1 PE=1 SV=1	sp|Q924Z9|NET1_RAT	68 kDa	1	1
Eukaryotic translation initiation factor 3 subunit J OS=Rattus norvegicus GN=Eif3j PE=2 SV=1	sp|A0JPM9|EIF3J_RAT	29 kDa	1	1.3
Synaptosomal-associated protein 23 OS=Rattus norvegicus GN=Snap23 PE=1 SV=1	sp|O70377|SNP23_RAT	23 kDa	1	1
Mannose-binding protein A OS=Rattus norvegicus GN=Mbl1 PE=1 SV=1	sp|P19999|MBL1_RAT	25 kDa	1	0.9
Tyrosine-protein phosphatase non-receptor type 11 OS=Rattus norvegicus GN=Ptpn11 PE=1 SV=4	sp|P41499|PTN11_RAT	68 kDa	1	1
5'-AMP-activated protein kinase catalytic subunit alpha-2 OS=Rattus norvegicus GN=Prkaa2 PE=1 SV=1	sp|Q09137|AAPK2_RAT	62 kDa	1	1.2
Aspartoacylase-2 OS=Rattus norvegicus GN=Acy3 PE=2 SV=1	sp|Q5M876|ACY3_RAT	35 kDa	1	1.3
ADP-ribose pyrophosphatase, mitochondrial OS=Rattus norvegicus GN=Nudt9 PE=2 SV=1	sp|Q5XIG0|NUDT9_RAT	39 kDa	1	1
Interferon-induced guanylate-binding protein 2 OS=Rattus norvegicus GN=Gbp2 PE=1 SV=2	sp|Q63663|GBP2_RAT	67 kDa	1	1
Prostaglandin G/H synthase 1 OS=Rattus norvegicus GN=Ptgs1 PE=2 SV=2	sp|Q63921|PGH1_RAT	69 kDa	1	1.1
Ethylmalonyl-CoA decarboxylase OS=Rattus norvegicus GN=Echdc1 PE=1 SV=1	sp|Q6AYG5|ECHD1_RAT	33 kDa	1	1.1
Exportin-1 OS=Rattus norvegicus GN=Xpo1 PE=2 SV=1	sp|Q80U96|XPO1_RAT	123 kDa	1	1.1
Acyl-protein thioesterase 2 OS=Rattus norvegicus GN=Lypla2 PE=1 SV=1	sp|Q9QYL8|LYPA2_RAT	25 kDa	1	1.3
Nucleoside diphosphate-linked moiety X motif 6 OS=Rattus norvegicus GN=Nudt6 PE=1 SV=1	sp|P70563|NUDT6_RAT	35 kDa	1	1.2
N-acetyltransferase 8 OS=Rattus norvegicus GN=Nat8 PE=2 SV=1	sp|Q9QXT3|NAT8_RAT	25 kDa	1	1
NHP2-like protein 1 OS=Rattus norvegicus GN=Nhp2l1 PE=2 SV=4	sp|P55770|NH2L1_RAT	14 kDa	1	1.3
Kinesin heavy chain isoform 5A OS=Rattus norvegicus GN=Kif5a PE=1 SV=1	sp|Q6QLM7|KIF5A_RAT	117 kDa	1	1.2
Alkylglycerol monooxygenase OS=Rattus norvegicus GN=Agmo PE=2 SV=1	sp|A0JPQ8|ALKMO_RAT	52 kDa	1	0.9
Serine/threonine-protein kinase MRCK alpha OS=Rattus norvegicus GN=Cdc42bpa PE=1 SV=1	sp|O54874|MRCKA_RAT	197 kDa	1	1
Integrin beta-4 OS=Rattus norvegicus GN=Itgb4 PE=2 SV=1	sp|Q64632|ITB4_RAT	201 kDa	1	0.9
Coactosin-like protein OS=Rattus norvegicus GN=Cotl1 PE=1 SV=1	sp|B0BNA5|COTL1_RAT	16 kDa	1	1.2
Receptor expression-enhancing protein 5 OS=Rattus norvegicus GN=Reep5 PE=1 SV=1	sp|B2RZ37|REEP5_RAT	21 kDa	1	0.8
Caspase-6 OS=Rattus norvegicus GN=Casp6 PE=2 SV=2	sp|O35397|CASP6_RAT	32 kDa	1	1.1
Alpha-mannosidase 2 (Fragment) OS=Rattus norvegicus GN=Man2a1 PE=1 SV=1	sp|P28494|MA2A1_RAT	57 kDa	1	1.2
Dual specificity mitogen-activated protein kinase kinase 2 OS=Rattus norvegicus GN=Map2k2 PE=2 SV=1	sp|P36506|MP2K2_RAT	44 kDa	1	1
Mitochondrial import inner membrane translocase subunit Tim10 OS=Rattus norvegicus GN=Timm10 PE=2 SV=1	sp|P62074|TIM10_RAT	10 kDa	1	1
39S ribosomal protein L40, mitochondrial OS=Rattus norvegicus GN=Mrpl40 PE=1 SV=2	sp|P83565|RM40_RAT	24 kDa	1	0.9
Polypyrimidine tract-binding protein 1 OS=Rattus norvegicus GN=Ptbp1 PE=1 SV=1	sp|Q00438|PTBP1_RAT	59 kDa	1	1.4
Tyrosine--tRNA ligase, mitochondrial OS=Rattus norvegicus GN=Yars2 PE=2 SV=1	sp|Q5I0L3|SYYM_RAT	53 kDa	1	1
UPF0505 protein C16orf62 homolog OS=Rattus norvegicus PE=2 SV=1	sp|Q5XI83|CP062_RAT	106 kDa	1	1.3
Cytoplasmic dynein 1 intermediate chain 2 OS=Rattus norvegicus GN=Dync1i2 PE=1 SV=1	sp|Q62871|DC1I2_RAT	71 kDa	1	1
Macrophage-capping protein OS=Rattus norvegicus GN=Capg PE=1 SV=1	sp|Q6AYC4|CAPG_RAT	39 kDa	1	1.1
Histone-binding protein RBBP7 OS=Rattus norvegicus GN=Rbbp7 PE=2 SV=1	sp|Q71UF4|RBBP7_RAT	48 kDa	1	1.1
Golgi resident protein GCP60 OS=Rattus norvegicus GN=Acbd3 PE=2 SV=3	sp|Q7TNY6|GCP60_RAT	60 kDa	1	0.9
Deubiquitinating protein VCIP135 OS=Rattus norvegicus GN=Vcpip1 PE=1 SV=2	sp|Q8CF97|VCIP1_RAT	135 kDa	1	1.1
Glycylpeptide N-tetradecanoyltransferase 1 OS=Rattus norvegicus GN=Nmt1 PE=2 SV=1	sp|Q8K1Q0|NMT1_RAT	57 kDa	1	1.1
Histidine triad nucleotide-binding protein 3 OS=Rattus norvegicus GN=Hint3 PE=2 SV=2	sp|Q8K3P7|HINT3_RAT	20 kDa	1	0.9
Multiple coagulation factor deficiency protein 2 homolog OS=Rattus norvegicus GN=Mcfd2 PE=2 SV=1	sp|Q8K5B3|MCFD2_RAT	16 kDa	1	0.7
Optineurin OS=Rattus norvegicus GN=Optn PE=2 SV=3	sp|Q8R5M4|OPTN_RAT	67 kDa	1	0.8
Proteasome subunit beta type-7 OS=Rattus norvegicus GN=Psmb7 PE=1 SV=1	sp|Q9JHW0|PSB7_RAT	30 kDa	1	1.3
Macrophage migration inhibitory factor OS=Rattus norvegicus GN=Mif PE=1 SV=4	sp|P30904|MIF_RAT	12 kDa	1	1.3
Sodium-coupled neutral amino acid transporter 3 OS=Rattus norvegicus GN=Slc38a3 PE=2 SV=1	sp|Q9JHZ9|S38A3_RAT	56 kDa	1	1
Zinc-alpha-2-glycoprotein OS=Rattus norvegicus GN=Azgp1 PE=2 SV=1	sp|Q63678|ZA2G_RAT	34 kDa	1	0.8
Cathepsin S OS=Rattus norvegicus GN=Ctss PE=2 SV=1	sp|Q02765|CATS_RAT	37 kDa	1	1
Galectin-3-binding protein OS=Rattus norvegicus GN=Lgals3bp PE=1 SV=2	sp|O70513|LG3BP_RAT	64 kDa	1	1
NADH dehydrogenase [ubiquinone] 1 alpha subcomplex subunit 11 OS=Rattus norvegicus GN=Ndufa11 PE=2 SV=1	sp|Q80W89|NDUAB_RAT	15 kDa	1	0.8
DNA polymerase beta OS=Rattus norvegicus GN=Polb PE=1 SV=4	sp|P06766|DPOLB_RAT	38 kDa	1	0.9
Cytochrome c oxidase subunit 7C, mitochondrial OS=Rattus norvegicus GN=Cox7c PE=1 SV=2	sp|P80432|COX7C_RAT	7 kDa	1	0.9
Angiomotin-like protein 2 OS=Rattus norvegicus GN=Amotl2 PE=3 SV=1	sp|G3V735|AMOL2_RAT	86 kDa	1	1.2
Leucine-rich repeat flightless-interacting protein 2 OS=Rattus norvegicus GN=Lrrfip2 PE=2 SV=1	sp|Q4V7E8|LRRF2_RAT	50 kDa	1	1.1
CAP-Gly domain-containing linker protein 2 OS=Rattus norvegicus GN=Clip2 PE=1 SV=1	sp|O55156|CLIP2_RAT	115 kDa	1	0.9
Solute carrier organic anion transporter family member 1A1 OS=Rattus norvegicus GN=Slco1a1 PE=1 SV=1	sp|P46720|SO1A1_RAT	74 kDa	1	1
Glial fibrillary acidic protein OS=Rattus norvegicus GN=Gfap PE=1 SV=2	sp|P47819|GFAP_RAT	50 kDa	1	1.1
Signal transducer and activator of transcription 3 OS=Rattus norvegicus GN=Stat3 PE=1 SV=1	sp|P52631|STAT3_RAT	88 kDa	1	0.9
Trafficking protein particle complex subunit 3 OS=Rattus norvegicus GN=Trappc3 PE=2 SV=1	sp|Q5U1Z2|TPPC3_RAT	20 kDa	1	1.1
Fragile X mental retardation syndrome-related protein 1 OS=Rattus norvegicus GN=Fxr1 PE=2 SV=1	sp|Q5XI81|FXR1_RAT	64 kDa	1	1
Mannose-1-phosphate guanyltransferase alpha OS=Rattus norvegicus GN=Gmppa PE=2 SV=1	sp|Q5XIC1|GMPPA_RAT	46 kDa	1	1.6
Proteasome inhibitor PI31 subunit OS=Rattus norvegicus GN=Psmf1 PE=2 SV=1	sp|Q5XIU5|PSMF1_RAT	30 kDa	1	1.3
Peroxisomal membrane protein PEX14 OS=Rattus norvegicus GN=Pex14 PE=1 SV=1	sp|Q642G4|PEX14_RAT	41 kDa	1	0.8
ATP-binding cassette sub-family F member 1 OS=Rattus norvegicus GN=Abcf1 PE=1 SV=1	sp|Q6MG08|ABCF1_RAT	95 kDa	1	1.3
Sister chromatid cohesion protein PDS5 homolog B OS=Rattus norvegicus GN=Pds5b PE=2 SV=2	sp|Q6TRW4|PDS5B_RAT	164 kDa	1	0.8
Carnitine O-acetyltransferase OS=Rattus norvegicus GN=Crat PE=1 SV=1	sp|Q704S8|CACP_RAT	71 kDa	1	1.3
Mitochondrial 2-oxodicarboxylate carrier OS=Rattus norvegicus GN=Slc25a21 PE=2 SV=1	sp|Q99JD3|ODC_RAT	33 kDa	1	1.1
Phytanoyl-CoA dioxygenase domain-containing protein 1 OS=Rattus norvegicus GN=Phyhd1 PE=2 SV=1	sp|Q5BJP9|PHYD1_RAT	33 kDa	1	1.3
Cell cycle control protein 50A OS=Rattus norvegicus GN=Tmem30a PE=2 SV=1	sp|Q6AY41|CC50A_RAT	37 kDa	1	1.1
Carcinoembryonic antigen-related cell adhesion molecule 1 OS=Rattus norvegicus GN=Ceacam1 PE=1 SV=3	sp|P16573|CEAM1_RAT	57 kDa	1	1.1
Abhydrolase domain-containing protein 16A OS=Rattus norvegicus GN=Abhd16a PE=2 SV=1	sp|Q6MG55|ABHGA_RAT	63 kDa	1	0.8
Unconventional myosin-Vb OS=Rattus norvegicus GN=Myo5b PE=1 SV=1	sp|P70569|MYO5B_RAT	214 kDa	1	1.2
ADP-ribosylation factor 6 OS=Rattus norvegicus GN=Arf6 PE=1 SV=2	sp|P62332|ARF6_RAT	20 kDa	1	0.9
Cluster of C-type lectin domain family 2 member D11 OS=Rattus norvegicus GN=Clec2d11 PE=2 SV=1 (sp|Q0H8B9|CL2DB_RAT)	sp|Q0H8B9|CL2DB_RAT	24 kDa	1	0.9
ER membrane protein complex subunit 10 OS=Rattus norvegicus GN=Emc10 PE=1 SV=1	sp|Q6AYH6|EMC10_RAT	27 kDa	1	0.9
Calcineurin B homologous protein 1 OS=Rattus norvegicus GN=Chp1 PE=1 SV=2	sp|P61023|CHP1_RAT	22 kDa	1	0.9
Tyrosine-protein phosphatase non-receptor type 23 (Fragment) OS=Rattus norvegicus GN=Ptpn23 PE=1 SV=2	sp|O88902|PTN23_RAT	163 kDa	1	1.2
Carbohydrate-responsive element-binding protein OS=Rattus norvegicus GN=Mlxipl PE=1 SV=1	sp|Q8VIP2|MLXPL_RAT	95 kDa	1	0.9
Paxillin OS=Rattus norvegicus GN=Pxn PE=1 SV=1	sp|Q66H76|PAXI_RAT	64 kDa	1	1.2
Serine/threonine-protein kinase A-Raf OS=Rattus norvegicus GN=Araf PE=2 SV=1	sp|P14056|ARAF_RAT	68 kDa	1	1.3
Vitamin K-dependent protein C OS=Rattus norvegicus GN=Proc PE=2 SV=1	sp|P31394|PROC_RAT	52 kDa	1	1
COP9 signalosome complex subunit 2 OS=Rattus norvegicus GN=Cops2 PE=2 SV=1	sp|P61203|CSN2_RAT	52 kDa	1	1.2
40S ribosomal protein S28 OS=Rattus norvegicus GN=Rps28 PE=1 SV=1	sp|P62859|RS28_RAT	8 kDa	1	1
Bleomycin hydrolase OS=Rattus norvegicus GN=Blmh PE=1 SV=1	sp|P70645|BLMH_RAT	52 kDa	1	0.9
RNA-binding protein 8A OS=Rattus norvegicus GN=Rbm8a PE=2 SV=1	sp|Q27W01|RBM8A_RAT	20 kDa	1	1
Protein unc-45 homolog A OS=Rattus norvegicus GN=Unc45a PE=2 SV=1	sp|Q32PZ3|UN45A_RAT	103 kDa	1	1.2
Proteasome subunit beta type-10 OS=Rattus norvegicus GN=Psmb10 PE=2 SV=1	sp|Q4KM35|PSB10_RAT	29 kDa	1	1.5
PDZ and LIM domain protein 5 OS=Rattus norvegicus GN=Pdlim5 PE=1 SV=2	sp|Q62920|PDLI5_RAT	63 kDa	1	1.1
Retinol dehydrogenase 10 OS=Rattus norvegicus GN=Rdh10 PE=1 SV=1	sp|Q80ZF7|RDH10_RAT	38 kDa	1	0.8
Fatty acid desaturase 2 OS=Rattus norvegicus GN=Fads2 PE=2 SV=1	sp|Q9Z122|FADS2_RAT	52 kDa	1	0.7
Vesicle-associated membrane protein-associated protein B OS=Rattus norvegicus GN=Vapb PE=1 SV=3	sp|Q9Z269|VAPB_RAT	27 kDa	1	1.2
Methionine-R-sulfoxide reductase B2, mitochondrial OS=Rattus norvegicus GN=Msrb2 PE=2 SV=1	sp|Q4FZX5|MSRB2_RAT	19 kDa	1	1
ATP-binding cassette sub-family B member 6, mitochondrial OS=Rattus norvegicus GN=Abcb6 PE=2 SV=1	sp|O70595|ABCB6_RAT	93 kDa	1	1
39S ribosomal protein L38, mitochondrial OS=Rattus norvegicus GN=Mrpl38 PE=2 SV=2	sp|Q5PQN9|RM38_RAT	45 kDa	1	0.9
NADH dehydrogenase [ubiquinone] iron-sulfur protein 6, mitochondrial OS=Rattus norvegicus GN=Ndufs6 PE=3 SV=1	sp|P52504|NDUS6_RAT	13 kDa	1	1
Protein BUD31 homolog OS=Rattus norvegicus GN=Bud31 PE=2 SV=2	sp|O70454|BUD31_RAT	17 kDa	1	0.8
Gap junction beta-1 protein OS=Rattus norvegicus GN=Gjb1 PE=1 SV=1	sp|P08033|CXB1_RAT	32 kDa	1	1.4
Mitochondrial import inner membrane translocase subunit Tim9 B OS=Rattus norvegicus GN=Fxc1 PE=2 SV=1	sp|Q9R1B1|TIM9B_RAT	11 kDa	1	0.8
NADH-ubiquinone oxidoreductase chain 5 OS=Rattus norvegicus GN=Mtnd5 PE=2 SV=2	sp|P11661|NU5M_RAT	69 kDa	1	0.9
Transmembrane protein 11, mitochondrial OS=Rattus norvegicus GN=Tmem11 PE=2 SV=1	sp|B0BN86|TMM11_RAT	21 kDa	1	1
Cysteine dioxygenase type 1 OS=Rattus norvegicus GN=Cdo1 PE=1 SV=1	sp|P21816|CDO1_RAT	23 kDa	1	0.9
L-lactate dehydrogenase B chain OS=Rattus norvegicus GN=Ldhb PE=1 SV=2	sp|P42123|LDHB_RAT	37 kDa	1	0.8
Carbonic anhydrase 5A, mitochondrial OS=Rattus norvegicus GN=Ca5a PE=1 SV=1	sp|P43165|CAH5A_RAT	34 kDa	1	1.3
Desmin OS=Rattus norvegicus GN=Des PE=1 SV=2	sp|P48675|DESM_RAT	53 kDa	1	1.1
Squalene monooxygenase OS=Rattus norvegicus GN=Sqle PE=2 SV=1	sp|P52020|ERG1_RAT	64 kDa	1	1.1
40S ribosomal protein S15 OS=Rattus norvegicus GN=Rps15 PE=1 SV=2	sp|P62845|RS15_RAT	17 kDa	1	1.4
Cluster of Ras-related protein Ral-A OS=Rattus norvegicus GN=Rala PE=1 SV=1 (sp|P63322|RALA_RAT)	sp|P63322|RALA_RAT [2]	24 kDa	1	1.1
Beta-mannosidase OS=Rattus norvegicus GN=Manba PE=2 SV=1	sp|Q4FZV0|MANBA_RAT	101 kDa	1	1.1
General transcription factor II-I OS=Rattus norvegicus GN=Gtf2i PE=2 SV=2	sp|Q5U2Y1|GTF2I_RAT	110 kDa	1	1
Ufm1-specific protease 2 OS=Rattus norvegicus GN=Ufsp2 PE=2 SV=1	sp|Q5XIB4|UFSP2_RAT	52 kDa	1	0.8
COP9 signalosome complex subunit 3 OS=Rattus norvegicus GN=Cops3 PE=2 SV=1	sp|Q68FW9|CSN3_RAT	48 kDa	1	1.2
Ribosyldihydronicotinamide dehydrogenase [quinone] OS=Rattus norvegicus GN=Nqo2 PE=1 SV=3	sp|Q6AY80|NQO2_RAT	26 kDa	1	1.1
Calcium uptake protein 1, mitochondrial OS=Rattus norvegicus GN=Micu1 PE=2 SV=1	sp|Q6P6Q9|MICU1_RAT	54 kDa	1	0.8
Dipeptidase 1 OS=Rattus norvegicus GN=Dpep1 PE=2 SV=2	sp|P31430|DPEP1_RAT	46 kDa	1	0.9
Mitochondrial import receptor subunit TOM40 homolog OS=Rattus norvegicus GN=Tomm40 PE=1 SV=1	sp|Q75Q40|TOM40_RAT	38 kDa	1	0.8
Magnesium transporter protein 1 OS=Rattus norvegicus GN=Magt1 PE=2 SV=2	sp|O35777|MAGT1_RAT	38 kDa	1	1
Conserved oligomeric Golgi complex subunit 6 OS=Rattus norvegicus GN=Cog6 PE=2 SV=1	sp|Q68FP9|COG6_RAT	73 kDa	1	1.1
Vacuolar protein sorting-associated protein 4A OS=Rattus norvegicus GN=Vps4a PE=2 SV=1	sp|Q793F9|VPS4A_RAT	49 kDa	1	1.1
Cytoplasmic dynein 1 light intermediate chain 1 OS=Rattus norvegicus GN=Dync1li1 PE=1 SV=1	sp|Q9QXU8|DC1L1_RAT	57 kDa	1	1.2
FAS-associated factor 2 OS=Rattus norvegicus GN=Faf2 PE=2 SV=1	sp|Q5BK32|FAF2_RAT	41 kDa	1	1.1
Calcyclin-binding protein OS=Rattus norvegicus GN=Cacybp PE=1 SV=1	sp|Q6AYK6|CYBP_RAT	27 kDa	1	1.2
Peroxisomal biogenesis factor 19 OS=Rattus norvegicus GN=Pex19 PE=2 SV=1	sp|Q9QYU1|PEX19_RAT	32 kDa	1	1
Decorin OS=Rattus norvegicus GN=Dcn PE=1 SV=1	sp|Q01129|PGS2_RAT	40 kDa	1	1.1
STE20-like serine/threonine-protein kinase OS=Rattus norvegicus GN=Slk PE=2 SV=1	sp|O08815|SLK_RAT	138 kDa	1	1.4
RNA polymerase II-associated protein 3 OS=Rattus norvegicus GN=Rpap3 PE=2 SV=1	sp|Q68FQ7|RPAP3_RAT	75 kDa	1	0.9
39S ribosomal protein L11, mitochondrial OS=Rattus norvegicus GN=Mrpl11 PE=2 SV=1	sp|Q5XIE3|RM11_RAT	22 kDa	1	1
Nexilin OS=Rattus norvegicus GN=Nexn PE=1 SV=1	sp|Q9Z2J4|NEXN_RAT	78 kDa	1	1
Cytochrome b-c1 complex subunit 8 OS=Rattus norvegicus GN=Uqcrq PE=2 SV=1	sp|Q7TQ16|QCR8_RAT	10 kDa	1	0.9
Intraflagellar transport protein 172 homolog OS=Rattus norvegicus GN=Ift172 PE=1 SV=1	sp|Q9JKU3|IF172_RAT	198 kDa	1	1
Tektin-3 OS=Rattus norvegicus GN=Tekt3 PE=1 SV=1	sp|Q4V8G8|TEKT3_RAT	56 kDa	1	0.9
Plasma membrane calcium-transporting ATPase 2 OS=Rattus norvegicus GN=Atp2b2 PE=2 SV=2	sp|P11506|AT2B2_RAT	137 kDa	1	0.6
Actin-related protein 2/3 complex subunit 5-like protein OS=Rattus norvegicus GN=Arpc5l PE=1 SV=2	sp|A1L108|ARP5L_RAT	17 kDa	1	1.1
Cytochrome P450 4B1 OS=Rattus norvegicus GN=Cyp4b1 PE=1 SV=3	sp|P15129|CP4B1_RAT	59 kDa	1	1.1
Lamina-associated polypeptide 2, isoform beta OS=Rattus norvegicus GN=Tmpo PE=1 SV=3	sp|Q62733|LAP2_RAT	50 kDa	1	1.1
28 kDa heat- and acid-stable phosphoprotein OS=Rattus norvegicus GN=Pdap1 PE=1 SV=1	sp|Q62785|HAP28_RAT	21 kDa	1	1.1
UPF0160 protein MYG1, mitochondrial OS=Rattus norvegicus GN=Myg1 PE=1 SV=1	sp|Q641W2|MYG1_RAT	43 kDa	1	0.9
WD40 repeat-containing protein SMU1 OS=Rattus norvegicus GN=Smu1 PE=2 SV=1	sp|Q99M63|SMU1_RAT	58 kDa	1	1
Sorting nexin-1 OS=Rattus norvegicus GN=Snx1 PE=1 SV=1	sp|Q99N27|SNX1_RAT	59 kDa	1	1
Cluster of C-terminal-binding protein 1 OS=Rattus norvegicus GN=Ctbp1 PE=1 SV=3 (sp|Q9Z2F5|CTBP1_RAT)	sp|Q9Z2F5|CTBP1_RAT	47 kDa	1	1.3
Cullin-3 OS=Rattus norvegicus GN=Cul3 PE=1 SV=2	sp|B5DF89|CUL3_RAT	89 kDa	1	0.9
Antigen-presenting glycoprotein CD1d OS=Rattus norvegicus GN=Cd1d PE=2 SV=2	sp|Q63493|CD1D_RAT	39 kDa	1	0.9
Methyl-CpG-binding protein 2 OS=Rattus norvegicus GN=Mecp2 PE=1 SV=1	sp|Q00566|MECP2_RAT	53 kDa	1	1.1
Sigma non-opioid intracellular receptor 1 OS=Rattus norvegicus GN=Sigmar1 PE=1 SV=1	sp|Q9R0C9|SGMR1_RAT	25 kDa	1	0.8
39S ribosomal protein L22, mitochondrial OS=Rattus norvegicus GN=Mrpl22 PE=1 SV=1	sp|P0C2C0|RM22_RAT	24 kDa	1	1.3
Ras-related protein Rab-9A OS=Rattus norvegicus GN=Rab9a PE=1 SV=2	sp|Q99P75|RAB9A_RAT	23 kDa	1	1.3
Thyroid hormone-inducible hepatic protein OS=Rattus norvegicus GN=Thrsp PE=2 SV=1	sp|P04143|THRSP_RAT	17 kDa	1	0.8
Histone deacetylase 1 OS=Rattus norvegicus GN=Hdac1 PE=2 SV=1	sp|Q4QQW4|HDAC1_RAT	55 kDa	1	0.7
UPF0587 protein C1orf123 homolog OS=Rattus norvegicus PE=2 SV=1	sp|Q498R7|CA123_RAT	18 kDa	1	1.2
DnaJ homolog subfamily C member 25 OS=Rattus norvegicus GN=Dnajc25 PE=2 SV=1	sp|Q5BJW9|DJC25_RAT	42 kDa	1	0.9
39S ribosomal protein L9, mitochondrial OS=Rattus norvegicus GN=Mrpl9 PE=2 SV=1	sp|Q641X9|RM09_RAT	30 kDa	1	1.2
45 kDa calcium-binding protein OS=Rattus norvegicus GN=Sdf4 PE=1 SV=1	sp|Q91ZS3|CAB45_RAT	42 kDa	1	1
Low-density lipoprotein receptor OS=Rattus norvegicus GN=Ldlr PE=2 SV=1	sp|P35952|LDLR_RAT	97 kDa	1	1
Keratin, type II cytoskeletal 4 OS=Rattus norvegicus GN=Krt4 PE=2 SV=1	sp|Q6IG00|K2C4_RAT	58 kDa	1	0.9
Glutaminase kidney isoform, mitochondrial OS=Rattus norvegicus GN=Gls PE=1 SV=2	sp|P13264|GLSK_RAT	74 kDa	1	1.1
Protein FAM210A OS=Rattus norvegicus GN=Fam210a PE=2 SV=1	sp|Q5XIJ4|F210A_RAT	31 kDa	1	1
Lysosome-associated membrane glycoprotein 2 OS=Rattus norvegicus GN=Lamp2 PE=1 SV=2	sp|P17046|LAMP2_RAT	45 kDa	1	1
Receptor-type tyrosine-protein phosphatase S OS=Rattus norvegicus GN=Ptprs PE=1 SV=2	sp|Q64605|PTPRS_RAT	212 kDa	1	1
Cytochrome b OS=Rattus norvegicus GN=Mt-Cyb PE=2 SV=2	sp|P00159|CYB_RAT	43 kDa	1	0.9
Scm-like with four MBT domains protein 1 OS=Rattus norvegicus GN=Sfmbt1 PE=2 SV=2	sp|Q9JMD2|SMBT1_RAT	98 kDa	1	1
Growth arrest-specific protein 8 OS=Rattus norvegicus GN=Gas8 PE=2 SV=1	sp|Q499U4|GAS8_RAT	56 kDa	1	0.9
Acetoacetyl-CoA synthetase OS=Rattus norvegicus GN=Aacs PE=1 SV=1	sp|Q9JMI1|AACS_RAT	75 kDa	1	3.1
Aldose reductase OS=Rattus norvegicus GN=Akr1b1 PE=1 SV=3	sp|P07943|ALDR_RAT	36 kDa	1	1.4
Granulins OS=Rattus norvegicus GN=Grn PE=1 SV=3	sp|P23785|GRN_RAT	63 kDa	1	1.2
Mitochondrial ribonuclease P protein 1 OS=Rattus norvegicus GN=Trmt10c PE=2 SV=1	sp|Q5U2R4|MRRP1_RAT	48 kDa	1	1.5
Ankycorbin OS=Rattus norvegicus GN=Rai14 PE=2 SV=2	sp|Q5U312|RAI14_RAT	109 kDa	1	1.3
Heat shock protein beta-8 OS=Rattus norvegicus GN=Hspb8 PE=1 SV=1	sp|Q9EPX0|HSPB8_RAT	22 kDa	1	1
Nuclear protein localization protein 4 homolog OS=Rattus norvegicus GN=Nploc4 PE=1 SV=3	sp|Q9ES54|NPL4_RAT	68 kDa	1	1
Drebrin-like protein OS=Rattus norvegicus GN=Dbnl PE=1 SV=1	sp|Q9JHL4|DBNL_RAT	49 kDa	1	0.8
LanC-like protein 1 OS=Rattus norvegicus GN=Lancl1 PE=2 SV=2	sp|Q9QX69|LANC1_RAT	45 kDa	1	1.1
Serine racemase OS=Rattus norvegicus GN=Srr PE=1 SV=1	sp|Q76EQ0|SRR_RAT	36 kDa	1	0.9
Fatty acid desaturase 1 OS=Rattus norvegicus GN=Fads1 PE=2 SV=1	sp|Q920R3|FADS1_RAT	52 kDa	1	0.8
Carboxypeptidase D OS=Rattus norvegicus GN=Cpd PE=2 SV=2	sp|Q9JHW1|CBPD_RAT	153 kDa	1	1.1
Ubiquitin carboxyl-terminal hydrolase isozyme L3 OS=Rattus norvegicus GN=Uchl3 PE=1 SV=1	sp|Q91Y78|UCHL3_RAT	26 kDa	1	1
Aspartoacylase OS=Rattus norvegicus GN=Aspa PE=1 SV=2	sp|Q9R1T5|ACY2_RAT	35 kDa	1	1.1
Complement component C6 OS=Rattus norvegicus GN=C6 PE=2 SV=1	sp|Q811M5|CO6_RAT	105 kDa	1	0.8
Calponin-3 OS=Rattus norvegicus GN=Cnn3 PE=1 SV=1	sp|P37397|CNN3_RAT	36 kDa	1	1
Complement component C8 beta chain OS=Rattus norvegicus GN=C8b PE=2 SV=2	sp|P55314|CO8B_RAT	67 kDa	1	0.9
Vitamin K-dependent gamma-carboxylase OS=Rattus norvegicus GN=Ggcx PE=1 SV=1	sp|O88496|VKGC_RAT	87 kDa	1	1
Receptor-type tyrosine-protein phosphatase F OS=Rattus norvegicus GN=Ptprf PE=2 SV=1	sp|Q64604|PTPRF_RAT	211 kDa	1	0.5
IST1 homolog OS=Rattus norvegicus GN=Ist1 PE=2 SV=1	sp|Q568Z6|IST1_RAT	40 kDa	1	1.3
Gamma-interferon-inducible lysosomal thiol reductase OS=Rattus norvegicus GN=Ifi30 PE=2 SV=1	sp|Q499T2|GILT_RAT	28 kDa	1	1.8
Legumain OS=Rattus norvegicus GN=Lgmn PE=2 SV=1	sp|Q9R0J8|LGMN_RAT	49 kDa	1	0.9
Leucine-rich repeat flightless-interacting protein 1 OS=Rattus norvegicus GN=Lrrfip1 PE=1 SV=1	sp|Q66HF9|LRRF1_RAT	80 kDa	1	0.9
Steroid 17-alpha-hydroxylase/17,20 lyase OS=Rattus norvegicus GN=Cyp17a1 PE=1 SV=2	sp|P11715|CP17A_RAT	57 kDa	1	0.8
Voltage-dependent calcium channel subunit alpha-2/delta-1 OS=Rattus norvegicus GN=Cacna2d1 PE=1 SV=1	sp|P54290|CA2D1_RAT	124 kDa	1	0.9
ADP-ribosylation factor GTPase-activating protein 1 OS=Rattus norvegicus GN=Arfgap1 PE=1 SV=1	sp|Q62848|ARFG1_RAT	45 kDa	1	0.8
Ubiquitin fusion degradation protein 1 homolog OS=Rattus norvegicus GN=Ufd1l PE=1 SV=1	sp|Q9ES53|UFD1_RAT	34 kDa	1	1.1
Platelet glycoprotein 4 OS=Rattus norvegicus GN=Cd36 PE=1 SV=3	sp|Q07969|CD36_RAT	53 kDa	1	1.1
Acyl-CoA desaturase 1 OS=Rattus norvegicus GN=Scd1 PE=2 SV=2	sp|P07308|ACOD1_RAT	41 kDa	1	0.8
Potassium voltage-gated channel subfamily H member 2 OS=Rattus norvegicus GN=Kcnh2 PE=1 SV=1	sp|O08962|KCNH2_RAT	127 kDa	1	0.9
Cullin-associated NEDD8-dissociated protein 2 OS=Rattus norvegicus GN=Cand2 PE=1 SV=1	sp|Q9R0L4|CAND2_RAT	140 kDa	1	1.3
Cysteine and glycine-rich protein 1 OS=Rattus norvegicus GN=Csrp1 PE=2 SV=2	sp|P47875|CSRP1_RAT	21 kDa	1	0.9
V-type proton ATPase subunit F OS=Rattus norvegicus GN=Atp6v1f PE=1 SV=1	sp|P50408|VATF_RAT	13 kDa	1	1
UPF0696 protein C11orf68 homolog OS=Rattus norvegicus GN=Bles03 PE=1 SV=1	sp|Q566Q8|CK068_RAT	27 kDa	1	1.3
ER membrane protein complex subunit 3 OS=Rattus norvegicus GN=Emc3 PE=2 SV=3	sp|Q5U2V8|EMC3_RAT	30 kDa	1	0.8
COP9 signalosome complex subunit 8 OS=Rattus norvegicus GN=Cops8 PE=2 SV=1	sp|Q6P4Z9|CSN8_RAT	23 kDa	1	1.2
3'(2'),5'-bisphosphate nucleotidase 1 OS=Rattus norvegicus GN=Bpnt1 PE=1 SV=1	sp|Q9Z1N4|BPNT1_RAT	33 kDa	1	1.2
Nicotinate phosphoribosyltransferase OS=Rattus norvegicus GN=Naprt1 PE=2 SV=1	sp|Q6XQN1|PNCB_RAT	59 kDa	1	1.1
Calcium-binding mitochondrial carrier protein SCaMC-2 OS=Rattus norvegicus GN=Slc25a25 PE=1 SV=1	sp|Q8K3P6|SCMC2_RAT	53 kDa	1	1
ATP synthase subunit s, mitochondrial OS=Rattus norvegicus GN=Atp5s PE=2 SV=1	sp|Q5XIM4|ATP5S_RAT	23 kDa	1	1.3
Cluster of Serine/threonine-protein kinase PAK 2 OS=Rattus norvegicus GN=Pak2 PE=1 SV=1 (sp|Q64303|PAK2_RAT)	sp|Q64303|PAK2_RAT	58 kDa	1	1.3
DDB1- and CUL4-associated factor 11 OS=Rattus norvegicus GN=Dcaf11 PE=2 SV=1	sp|Q5M9G8|DCA11_RAT	62 kDa	1	0.9
Ataxin-10 OS=Rattus norvegicus GN=Atxn10 PE=1 SV=1	sp|Q9ER24|ATX10_RAT	54 kDa	1	0.9
Acetyl-CoA acetyltransferase, cytosolic OS=Rattus norvegicus GN=Acat2 PE=1 SV=1	sp|Q5XI22|THIC_RAT	41 kDa	1	1.3
Growth factor receptor-bound protein 2 OS=Rattus norvegicus GN=Grb2 PE=1 SV=1	sp|P62994|GRB2_RAT	25 kDa	1	1.1
Collagen alpha-2(I) chain OS=Rattus norvegicus GN=Col1a2 PE=1 SV=3	sp|P02466|CO1A2_RAT	130 kDa	1	1.1
Acyl-coenzyme A thioesterase 8 OS=Rattus norvegicus GN=Acot8 PE=2 SV=1	sp|Q8VHK0|ACOT8_RAT	36 kDa	1	1.1
Vesicle-associated membrane protein 8 OS=Rattus norvegicus GN=Vamp8 PE=1 SV=1	sp|Q9WUF4|VAMP8_RAT	11 kDa	1	1
Glia maturation factor beta OS=Rattus norvegicus GN=Gmfb PE=1 SV=2	sp|Q63228|GMFB_RAT	17 kDa	1	1.2
Nidogen-2 OS=Rattus norvegicus GN=Nid2 PE=2 SV=1	sp|B5DFC9|NID2_RAT	153 kDa	1	1
Suppressor of G2 allele of SKP1 homolog OS=Rattus norvegicus GN=Sugt1 PE=2 SV=1	sp|B0BN85|SUGT1_RAT	38 kDa	1	0.8
5-aminolevulinate synthase, nonspecific, mitochondrial OS=Rattus norvegicus GN=Alas1 PE=2 SV=2	sp|P13195|HEM1_RAT	71 kDa	1	0.9
Cullin-5 OS=Rattus norvegicus GN=Cul5 PE=1 SV=3	sp|Q9JJ31|CUL5_RAT	91 kDa	1	1
Lamin-B receptor OS=Rattus norvegicus GN=Lbr PE=1 SV=1	sp|O08984|LBR_RAT	71 kDa	1	1
Hexokinase-1 OS=Rattus norvegicus GN=Hk1 PE=1 SV=4	sp|P05708|HXK1_RAT	102 kDa	1	0.8
Enhancer of mRNA-decapping protein 4 OS=Rattus norvegicus GN=Edc4 PE=2 SV=1	sp|Q3ZAV8|EDC4_RAT	153 kDa	1	1
DnaJ homolog subfamily B member 6 OS=Rattus norvegicus GN=Dnajb6 PE=1 SV=1	sp|Q6AYU3|DNJB6_RAT	39 kDa	1	0.9
Homer protein homolog 2 OS=Rattus norvegicus GN=Homer2 PE=1 SV=1	sp|O88801|HOME2_RAT	41 kDa	1	1.1
SWI/SNF-related matrix-associated actin-dependent regulator of chromatin subfamily A containing DEAD/H box 1 OS=Rattus norvegicus GN=Smarcad1 PE=3 SV=1	sp|D3Z9Z9|SMRCD_RAT	117 kDa	1	1.1
Histone acetyltransferase KAT6A OS=Rattus norvegicus GN=Kat6a PE=2 SV=2	sp|Q5TKR9|KAT6A_RAT	223 kDa	1	1.4
Coronin-7 (Fragment) OS=Rattus norvegicus GN=Coro7 PE=2 SV=1	sp|O35828|CORO7_RAT	49 kDa	1	1.3
Cluster of Epsin-1 OS=Rattus norvegicus GN=Epn1 PE=1 SV=1 (sp|O88339|EPN1_RAT)	sp|O88339|EPN1_RAT [2]	60 kDa	1	1.1
Latrophilin-2 OS=Rattus norvegicus GN=Lphn2 PE=1 SV=2	sp|O88923|LPHN2_RAT	167 kDa	1	0.9
SPARC OS=Rattus norvegicus GN=Sparc PE=1 SV=4	sp|P16975|SPRC_RAT	34 kDa	1	1.2
Transgelin OS=Rattus norvegicus GN=Tagln PE=1 SV=2	sp|P31232|TAGL_RAT	23 kDa	1	1.3
Band 4.1-like protein 5 OS=Rattus norvegicus GN=Epb41l5 PE=2 SV=2	sp|Q5FVG2|E41L5_RAT	82 kDa	1	1
Metalloreductase STEAP3 OS=Rattus norvegicus GN=Steap3 PE=2 SV=1	sp|Q5RKL5|STEA3_RAT	55 kDa	1	1.1
N-acetylgalactosamine kinase OS=Rattus norvegicus GN=Galk2 PE=2 SV=1	sp|Q5XIG6|GALK2_RAT	50 kDa	1	1.1
Lipoyl synthase, mitochondrial OS=Rattus norvegicus GN=Lias PE=2 SV=1	sp|Q5XIH4|LIAS_RAT	42 kDa	1	1.2
Gamma-adducin OS=Rattus norvegicus GN=Add3 PE=1 SV=2	sp|Q62847|ADDG_RAT	79 kDa	1	0.9
Solute carrier organic anion transporter family member 2A1 OS=Rattus norvegicus GN=Slco2a1 PE=1 SV=3	sp|Q00910|SO2A1_RAT	70 kDa	1	0.9
RWD domain-containing protein 1 OS=Rattus norvegicus GN=Rwdd1 PE=2 SV=1	sp|Q99ND9|RWDD1_RAT	28 kDa	1	0.9
Bis(5'-adenosyl)-triphosphatase OS=Rattus norvegicus GN=Fhit PE=1 SV=1	sp|Q9JIX3|FHIT_RAT	17 kDa	1	0.9
[Pyruvate dehydrogenase [lipoamide]] kinase isozyme 4, mitochondrial OS=Rattus norvegicus GN=Pdk4 PE=2 SV=1	sp|O54937|PDK4_RAT	47 kDa	1	1.3
mRNA export factor OS=Rattus norvegicus GN=Rae1 PE=2 SV=1	sp|Q3SWS8|RAE1L_RAT	41 kDa	1	1.2
Heat shock protein beta-1 OS=Rattus norvegicus GN=Hspb1 PE=1 SV=1	sp|P42930|HSPB1_RAT	23 kDa	1	1.3
Sodium- and chloride-dependent betaine transporter OS=Rattus norvegicus GN=Slc6a12 PE=2 SV=1	sp|P48056|S6A12_RAT	70 kDa	1	1.2
Epithelial splicing regulatory protein 2 OS=Rattus norvegicus GN=Esrp2 PE=2 SV=1	sp|B2RYJ8|ESRP2_RAT	77 kDa	1	1.3
Endophilin-B1 OS=Rattus norvegicus GN=Sh3glb1 PE=2 SV=1	sp|Q6AYE2|SHLB1_RAT	41 kDa	1	1.2
Acetyl-coenzyme A transporter 1 OS=Rattus norvegicus GN=Slc33a1 PE=2 SV=1	sp|Q6AYY8|ACATN_RAT	61 kDa	1	1
EF-hand domain-containing protein D2 OS=Rattus norvegicus GN=Efhd2 PE=1 SV=1	sp|Q4FZY0|EFHD2_RAT	27 kDa	1	1.3
Transcription elongation factor A protein 1 OS=Rattus norvegicus GN=Tcea1 PE=2 SV=1	sp|Q4KLL0|TCEA1_RAT	34 kDa	1	1.3
Peptidyl-prolyl cis-trans isomerase FKBP1A OS=Rattus norvegicus GN=Fkbp1a PE=1 SV=3	sp|Q62658|FKB1A_RAT	12 kDa	1	0.9
NAD-dependent protein deacetylase sirtuin-2 OS=Rattus norvegicus GN=Sirt2 PE=1 SV=1	sp|Q5RJQ4|SIR2_RAT	39 kDa	1	0.9
Endothelial differentiation-related factor 1 OS=Rattus norvegicus GN=Edf1 PE=1 SV=1	sp|P69736|EDF1_RAT	16 kDa	1	0.9
Keratin, type II cytoskeletal 1b OS=Rattus norvegicus GN=Krt77 PE=2 SV=1	sp|Q6IG01|K2C1B_RAT	57 kDa	1	0.9
Diacylglycerol O-acyltransferase 2 OS=Rattus norvegicus GN=Dgat2 PE=2 SV=1	sp|Q5FVP8|DGAT2_RAT	44 kDa	1	3.5
Inosine-5'-monophosphate dehydrogenase 2 OS=Rattus norvegicus GN=Impdh2 PE=3 SV=1	sp|E9PU28|IMDH2_RAT	56 kDa	1	0.9
Copper-transporting ATPase 1 OS=Rattus norvegicus GN=Atp7a PE=1 SV=1	sp|P70705|ATP7A_RAT	162 kDa	1	2.1
Exocyst complex component 3 OS=Rattus norvegicus GN=Exoc3 PE=1 SV=1	sp|Q62825|EXOC3_RAT	86 kDa	1	1.1
Programmed cell death protein 4 OS=Rattus norvegicus GN=Pdcd4 PE=1 SV=2	sp|Q9JID1|PDCD4_RAT	52 kDa	1	1.1
Glutaredoxin-1 OS=Rattus norvegicus GN=Glrx PE=2 SV=3	sp|Q9ESH6|GLRX1_RAT	12 kDa	1	1
Phosphotriesterase-related protein OS=Rattus norvegicus GN=Pter PE=2 SV=2	sp|Q63530|PTER_RAT	39 kDa	1	1.2
Corticosteroid-binding globulin OS=Rattus norvegicus GN=Serpina6 PE=1 SV=2	sp|P31211|CBG_RAT	45 kDa	1	1.1
Ryanodine receptor 1 OS=Rattus norvegicus GN=Ryr1 PE=2 SV=1	sp|F1LMY4|RYR1_RAT	565 kDa	1	1.3
Septin-8 OS=Rattus norvegicus GN=Sept8 PE=1 SV=1	sp|B0BNF1|SEPT8_RAT	51 kDa	1	1
Gamma-glutamyltranspeptidase 1 OS=Rattus norvegicus GN=Ggt1 PE=1 SV=4	sp|P07314|GGT1_RAT	62 kDa	1	1.1
Syntaxin-binding protein 5 OS=Rattus norvegicus GN=Stxbp5 PE=1 SV=1	sp|Q9WU70|STXB5_RAT	128 kDa	1	1.3
Ubiquitin carboxyl-terminal hydrolase 15 OS=Rattus norvegicus GN=Usp15 PE=1 SV=1	Q9R085	?	1	0.9
Small glutamine-rich tetratricopeptide repeat-containing protein alpha OS=Rattus norvegicus GN=Sgta PE=1 SV=1	sp|O70593|SGTA_RAT	34 kDa	1	1.1
Far upstream element-binding protein 1 OS=Rattus norvegicus GN=Fubp1 PE=1 SV=1	sp|Q32PX7|FUBP1_RAT	67 kDa	1	1
UPF0420 protein C16orf58 homolog OS=Rattus norvegicus PE=2 SV=1	sp|Q499P8|CP058_RAT	51 kDa	1	1
NAD-dependent protein deacylase sirtuin-5, mitochondrial OS=Rattus norvegicus GN=Sirt5 PE=2 SV=1	sp|Q68FX9|SIR5_RAT	34 kDa	1	1
Tumor susceptibility gene 101 protein OS=Rattus norvegicus GN=Tsg101 PE=1 SV=1	sp|Q6IRE4|TS101_RAT	44 kDa	1	1.2
Thiomorpholine-carboxylate dehydrogenase OS=Rattus norvegicus GN=Crym PE=1 SV=1	sp|Q9QYU4|CRYM_RAT	34 kDa	1	1.1
Large proline-rich protein BAG6 OS=Rattus norvegicus GN=Bag6 PE=2 SV=2	sp|Q6MG49|BAG6_RAT	120 kDa	1	1.2
DnaJ homolog subfamily C member 8 OS=Rattus norvegicus GN=Dnajc8 PE=2 SV=1	sp|Q642C0|DNJC8_RAT	30 kDa	1	1.1
Conserved oligomeric Golgi complex subunit 7 OS=Rattus norvegicus GN=Cog7 PE=2 SV=1	sp|Q3T1G7|COG7_RAT	86 kDa	1	1.1
Geranylgeranyl transferase type-2 subunit beta OS=Rattus norvegicus GN=Rabggtb PE=1 SV=1	sp|Q08603|PGTB2_RAT	37 kDa	1	1.6
Programmed cell death protein 10 OS=Rattus norvegicus GN=Pdcd10 PE=2 SV=1	sp|Q6NX65|PDC10_RAT	24 kDa	1	1.1
NADH dehydrogenase [ubiquinone] 1 alpha subcomplex assembly factor 4 OS=Rattus norvegicus GN=Ndufaf4 PE=1 SV=1	sp|Q9NQR8|NDUF4_RAT	20 kDa	1	1
Myotrophin OS=Rattus norvegicus GN=Mtpn PE=1 SV=2	sp|P62775|MTPN_RAT	13 kDa	1	1.1
Neudesin OS=Rattus norvegicus GN=Nenf PE=2 SV=1	sp|Q6IUR5|NENF_RAT	19 kDa	1	1
LDLR chaperone MESD OS=Rattus norvegicus GN=Mesdc2 PE=2 SV=1	sp|Q5U2R7|MESD_RAT	25 kDa	1	0.8
U1 small nuclear ribonucleoprotein C OS=Rattus norvegicus GN=Snrpc PE=3 SV=1	sp|D3ZCL3|RU1C_RAT	17 kDa	1	1
Serine/threonine-protein phosphatase PGAM5, mitochondrial OS=Rattus norvegicus GN=Pgam5 PE=2 SV=1	sp|Q562B5|PGAM5_RAT	32 kDa	1	0.9
60S ribosomal protein L36 OS=Rattus norvegicus GN=Rpl36 PE=1 SV=2	sp|P39032|RL36_RAT	12 kDa	1	1.6
Putative hydrolase RBBP9 OS=Rattus norvegicus GN=Rbbp9 PE=1 SV=2	sp|O88350|RBBP9_RAT	21 kDa	1	1.3
Stromal interaction molecule 1 OS=Rattus norvegicus GN=Stim1 PE=1 SV=1	sp|P84903|STIM1_RAT	77 kDa	1	1.2
AH receptor-interacting protein OS=Rattus norvegicus GN=Aip PE=1 SV=1	sp|Q5FWY5|AIP_RAT	38 kDa	1	1
Peptide chain release factor 1-like, mitochondrial OS=Rattus norvegicus GN=Mtrf1l PE=2 SV=1	sp|Q4V7E5|RF1ML_RAT	42 kDa	1	1.2
Cysteine and histidine-rich domain-containing protein 1 OS=Rattus norvegicus GN=Chordc1 PE=3 SV=1	sp|D4A4T9|CHRD1_RAT	37 kDa	1	1.1
DNA-directed RNA polymerases I, II, and III subunit RPABC1 OS=Rattus norvegicus GN=Polr2e PE=2 SV=1	sp|B0BNE2|RPAB1_RAT	25 kDa	1	1.2
Ryanodine receptor 2 OS=Rattus norvegicus GN=Ryr2 PE=1 SV=2	sp|B0LPN4|RYR2_RAT	563 kDa	1	0.8
Down syndrome cell adhesion molecule homolog OS=Rattus norvegicus GN=Dscam PE=1 SV=1	sp|Q8VHZ8|DSCAM_RAT	222 kDa	1	1.1
Interferon regulatory factor 2-binding protein-like OS=Rattus norvegicus GN=Irf2bpl PE=2 SV=1	sp|Q5EIC4|I2BPL_RAT	81 kDa	1	0.7
Potassium voltage-gated channel subfamily C member 1 OS=Rattus norvegicus GN=Kcnc1 PE=2 SV=1	sp|P25122|KCNC1_RAT	66 kDa	1	1.1
Septin-11 OS=Rattus norvegicus GN=Sept11 PE=1 SV=1	sp|B3GNI6|SEP11_RAT	50 kDa	1	1.1
Protein RUFY3 OS=Rattus norvegicus GN=Rufy3 PE=1 SV=1	sp|Q5FVJ0|RUFY3_RAT	53 kDa	1	1.1
Coagulation factor X OS=Rattus norvegicus GN=F10 PE=2 SV=1	sp|Q63207|FA10_RAT	54 kDa	1	0.8
Serine protease inhibitor A3M (Fragment) OS=Rattus norvegicus GN=Serpina3m PE=2 SV=1	sp|Q63556|SPA3M_RAT	46 kDa	1	1.1
Vesicle-associated membrane protein 7 OS=Rattus norvegicus GN=Vamp7 PE=1 SV=1	sp|Q9JHW5|VAMP7_RAT	25 kDa	1	1
Coxsackievirus and adenovirus receptor homolog OS=Rattus norvegicus GN=Cxadr PE=2 SV=2	sp|Q9R066|CXAR_RAT	40 kDa	1	0.8
Calcium-regulated heat stable protein 1 OS=Rattus norvegicus GN=Carhsp1 PE=1 SV=1	sp|Q9WU49|CHSP1_RAT	16 kDa	1	1.1
Mitochondrial intermembrane space import and assembly protein 40 OS=Rattus norvegicus GN=Chchd4 PE=2 SV=1	sp|Q5BJN5|MIA40_RAT	15 kDa	1	0.9
Quinone oxidoreductase-like protein 2 OS=Rattus norvegicus PE=2 SV=1	sp|B0BNC9|QORL2_RAT	38 kDa	1	1.1
Lysozyme C-1 OS=Rattus norvegicus GN=Lyz1 PE=1 SV=2	sp|P00697|LYSC1_RAT	17 kDa	1	1.1
Frataxin, mitochondrial OS=Rattus norvegicus GN=Fxn PE=1 SV=1	sp|D3ZYW7|FRDA_RAT	23 kDa	1	1
Protein FAM98A OS=Rattus norvegicus GN=Fam98a PE=2 SV=1	sp|Q5FWT1|FA98A_RAT	55 kDa	1	0.9
Eukaryotic translation initiation factor 4E OS=Rattus norvegicus GN=Eif4e PE=1 SV=1	sp|P63074|IF4E_RAT	25 kDa	1	0.9
Protein quaking OS=Rattus norvegicus GN=Qki PE=1 SV=2	sp|Q91XU1|QKI_RAT	38 kDa	1	1
NmrA-like family domain-containing protein 1 (Fragments) OS=Rattus norvegicus GN=Nmral1 PE=1 SV=1	sp|P86172|NMRL1_RAT	17 kDa	1	1.2
Plasminogen receptor (KT) OS=Rattus norvegicus GN=Plgrkt PE=1 SV=1	sp|D4ACN8|PLRKT_RAT	17 kDa	1	1
Proteasome subunit beta type-5 OS=Rattus norvegicus GN=Psmb5 PE=1 SV=3	sp|P28075|PSB5_RAT	29 kDa	1	1
Transmembrane and coiled-coil domains protein 1 OS=Rattus norvegicus GN=Tmco1 PE=2 SV=1	sp|Q5I0H4|TMCO1_RAT	21 kDa	1	1.2
SHC-transforming protein 1 OS=Rattus norvegicus GN=Shc1 PE=1 SV=1	sp|Q5M824|SHC1_RAT	52 kDa	1	1
m7GpppX diphosphatase OS=Rattus norvegicus GN=Dcps PE=2 SV=1	sp|Q8K4F7|DCPS_RAT	39 kDa	1	1
Synembryn-A OS=Rattus norvegicus GN=Ric8a PE=1 SV=2	sp|Q80ZG1|RIC8A_RAT	60 kDa	1	1.3
Solute carrier family 23 member 1 OS=Rattus norvegicus GN=Slc23a1 PE=2 SV=1	sp|Q9WTW7|S23A1_RAT	65 kDa	1	1.4
CD82 antigen OS=Rattus norvegicus GN=Cd82 PE=1 SV=1	sp|O70352|CD82_RAT	29 kDa	1	0.8
Transcription elongation factor B polypeptide 1 OS=Rattus norvegicus GN=Tceb1 PE=1 SV=1	sp|P83941|ELOC_RAT	12 kDa	1	1
Proteasomal ubiquitin receptor ADRM1 OS=Rattus norvegicus GN=Adrm1 PE=2 SV=2	sp|Q9JMB5|ADRM1_RAT	42 kDa	1	0.9
Vezatin OS=Rattus norvegicus GN=Vezt PE=2 SV=1	sp|Q5XI52|VEZA_RAT	89 kDa	1	0.8
Tissue alpha-L-fucosidase OS=Rattus norvegicus GN=Fuca1 PE=1 SV=1	sp|P17164|FUCO_RAT	53 kDa	1	1.5
Androgen-dependent TFPI-regulating protein OS=Rattus norvegicus GN=Adtrp PE=2 SV=1	sp|Q5M828|ADTRP_RAT	27 kDa	1	1.2
Cathepsin L1 OS=Rattus norvegicus GN=Ctsl1 PE=1 SV=2	sp|P07154|CATL1_RAT	38 kDa	1	1.1
Low affinity cationic amino acid transporter 2 OS=Rattus norvegicus GN=Slc7a2 PE=2 SV=1	sp|B5D5N9|CTR2_RAT	72 kDa	1	0.9
Protein PRRC2A OS=Rattus norvegicus GN=Prrc2a PE=1 SV=1	sp|Q6MG48|PRC2A_RAT	229 kDa	1	1.3
GTP cyclohydrolase 1 OS=Rattus norvegicus GN=Gch1 PE=1 SV=1	sp|P22288|GCH1_RAT	27 kDa	1	0.9
N-acetylgalactosamine-6-sulfatase OS=Rattus norvegicus GN=Galns PE=1 SV=1	sp|Q32KJ6|GALNS_RAT	58 kDa	1	1.5
Tetratricopeptide repeat protein 39B OS=Rattus norvegicus GN=Ttc39b PE=3 SV=1	sp|D3ZC96|TT39B_RAT	70 kDa	1	0.8
Vacuolar protein-sorting-associated protein 36 OS=Rattus norvegicus GN=Vps36 PE=1 SV=1	sp|P0C0A2|VPS36_RAT	44 kDa	1	0.9
Phosphatidylinositol-binding clathrin assembly protein OS=Rattus norvegicus GN=Picalm PE=1 SV=1	sp|O55012|PICA_RAT	69 kDa	1	11
Serine/threonine-protein kinase MARK2 OS=Rattus norvegicus GN=Mark2 PE=1 SV=1	sp|O08679|MARK2_RAT	81 kDa	1	0.8
Long-chain-fatty-acid--CoA ligase 6 OS=Rattus norvegicus GN=Acsl6 PE=1 SV=1	sp|P33124|ACSL6_RAT	78 kDa	1	0.9
Homer protein homolog 3 OS=Rattus norvegicus GN=Homer3 PE=2 SV=2	sp|Q9Z2X5|HOME3_RAT	40 kDa	1	0.9
NADH dehydrogenase [ubiquinone] 1 alpha subcomplex assembly factor 3 OS=Rattus norvegicus GN=Ndufaf3 PE=2 SV=1	sp|O08776|NDUF3_RAT	21 kDa	1	1
Golgi integral membrane protein 4 OS=Rattus norvegicus GN=Golim4 PE=1 SV=2	sp|Q5BJK8|GOLI4_RAT	77 kDa	1	1.4
Mitochondrial import inner membrane translocase subunit Tim21 OS=Rattus norvegicus GN=Timm21 PE=2 SV=1	sp|Q5U2X7|TIM21_RAT	28 kDa	1	0.9
Histidine-rich glycoprotein OS=Rattus norvegicus GN=Hrg PE=2 SV=1	sp|Q99PS8|HRG_RAT	59 kDa	1	1
Mitochondrial tRNA-specific 2-thiouridylase 1 OS=Rattus norvegicus GN=Trmu PE=2 SV=1	sp|B1WC37|MTU1_RAT	50 kDa	1	1
Serine/threonine-protein phosphatase 4 catalytic subunit OS=Rattus norvegicus GN=Ppp4c PE=1 SV=1	sp|Q5BJ92|PP4C_RAT	35 kDa	1	0.8
Cadherin-1 OS=Rattus norvegicus GN=Cdh1 PE=1 SV=1	sp|Q9R0T4|CADH1_RAT	99 kDa	1	1
Nuclear pore complex protein Nup54 OS=Rattus norvegicus GN=Nup54 PE=1 SV=1	sp|P70582|NUP54_RAT	56 kDa	1	1.1
Ubiquinone biosynthesis protein COQ7 homolog (Fragment) OS=Rattus norvegicus GN=Coq7 PE=2 SV=3	sp|Q63619|COQ7_RAT	20 kDa	1	0.9
Hsp70-binding protein 1 OS=Rattus norvegicus GN=Hspbp1 PE=2 SV=1	sp|Q6IMX7|HPBP1_RAT	39 kDa	1	0.8
Transmembrane protein 120A OS=Rattus norvegicus GN=Tmem120a PE=2 SV=1	sp|Q5HZE2|T120A_RAT	41 kDa	1	0.7
Ubiquitin thioesterase OTUB1 OS=Rattus norvegicus GN=Otub1 PE=1 SV=1	sp|B2RYG6|OTUB1_RAT	31 kDa	1	1.1
Adapter molecule crk OS=Rattus norvegicus GN=Crk PE=1 SV=1	sp|Q63768|CRK_RAT	34 kDa	1	1.1
Ras-related protein Rap-2b OS=Rattus norvegicus GN=Rap2b PE=2 SV=1	sp|P61227|RAP2B_RAT	21 kDa	1	1.1
Pre-B-cell leukemia transcription factor-interacting protein 1 OS=Rattus norvegicus GN=Pbxip1 PE=2 SV=1	sp|A2VD12|PBIP1_RAT	80 kDa	1	1
Ribosome-recycling factor, mitochondrial OS=Rattus norvegicus GN=Mrrf PE=2 SV=1	sp|Q5RKI9|RRFM_RAT	29 kDa	1	1.1
General transcription factor 3C polypeptide 1 OS=Rattus norvegicus GN=Gtf3c1 PE=1 SV=1	sp|Q63505|TF3C1_RAT	242 kDa	1	1.2
5'-AMP-activated protein kinase catalytic subunit alpha-1 OS=Rattus norvegicus GN=Prkaa1 PE=1 SV=2	sp|P54645|AAPK1_RAT	64 kDa	1	1.1
Syntaxin-7 OS=Rattus norvegicus GN=Stx7 PE=1 SV=4	sp|O70257|STX7_RAT	30 kDa	1	0.8
P2X purinoceptor 4 OS=Rattus norvegicus GN=P2rx4 PE=1 SV=1	sp|P51577|P2RX4_RAT	44 kDa	1	1
Bis(5'-nucleosyl)-tetraphosphatase [asymmetrical] OS=Rattus norvegicus GN=Nudt2 PE=2 SV=3	sp|Q6PEC0|AP4A_RAT	17 kDa	1	1.5
Niemann-Pick C1-like protein 1 OS=Rattus norvegicus GN=Npc1l1 PE=1 SV=1	sp|Q6T3U3|NPCL1_RAT	146 kDa	1	0.9
Ancient ubiquitous protein 1 OS=Rattus norvegicus GN=Aup1 PE=2 SV=1	sp|A1L134|AUP1_RAT	46 kDa	1	1.3
MAP/microtubule affinity-regulating kinase 3 OS=Rattus norvegicus GN=Mark3 PE=2 SV=1	sp|Q8VHF0|MARK3_RAT	89 kDa	1	0.9
Fibrinogen-like protein 1 OS=Rattus norvegicus GN=Fgl1 PE=2 SV=1	sp|Q5M8C6|FGL1_RAT	36 kDa	1	0.9
Serine/threonine-protein kinase PLK4 OS=Rattus norvegicus GN=Plk4 PE=2 SV=1	sp|B2GUY1|PLK4_RAT	104 kDa	1	1.1
Na(+)/H(+) exchange regulatory cofactor NHE-RF2 OS=Rattus norvegicus GN=Slc9a3r2 PE=1 SV=1	sp|Q920G2|NHRF2_RAT	37 kDa	1	0.9
Dynein heavy chain 7, axonemal OS=Rattus norvegicus GN=Dnah7 PE=2 SV=2	sp|Q63170|DYH7_RAT	465 kDa	1	0.9
Malignant T-cell-amplified sequence 1 OS=Rattus norvegicus GN=Mcts1 PE=2 SV=1	sp|Q4G009|MCTS1_RAT	21 kDa	1	1
SCO-spondin OS=Rattus norvegicus GN=Sspo PE=2 SV=1	sp|Q700K0|SSPO_RAT	551 kDa	1	1.3
DNA replication licensing factor MCM6 (Fragment) OS=Rattus norvegicus GN=Mcm6 PE=2 SV=2	sp|Q62724|MCM6_RAT	57 kDa	1	1.1
GTP-binding protein 1 OS=Rattus norvegicus GN=Gtpbp1 PE=1 SV=1	sp|D2XV59|GTPB1_RAT	72 kDa	1	1.3
Liprin-alpha-4 (Fragment) OS=Rattus norvegicus GN=Ppfia4 PE=1 SV=1	sp|Q91Z80|LIPA4_RAT	118 kDa	1	1.1
Cysteine-rich with EGF-like domain protein 2 OS=Rattus norvegicus GN=Creld2 PE=1 SV=1	sp|Q4G063|CREL2_RAT	38 kDa	1	1.1
FAST kinase domain-containing protein 2 OS=Rattus norvegicus GN=Fastkd2 PE=2 SV=1	sp|Q5M7V7|FAKD2_RAT	78 kDa	1	0.9
Lipoma-preferred partner homolog OS=Rattus norvegicus GN=Lpp PE=1 SV=1	sp|Q5XI07|LPP_RAT	68 kDa	1	1.2
Serine/threonine-protein kinase 3 OS=Rattus norvegicus GN=Stk3 PE=1 SV=1	sp|O54748|STK3_RAT	56 kDa	1	0.9
Galectin-3 OS=Rattus norvegicus GN=Lgals3 PE=1 SV=4	sp|P08699|LEG3_RAT	27 kDa	1	0.8
Vesicle transport through interaction with t-SNAREs homolog 1B OS=Rattus norvegicus GN=Vti1b PE=1 SV=2	sp|P58200|VTI1B_RAT	27 kDa	1	1.1
Cytochrome P450 4A10 OS=Rattus norvegicus GN=Cyp4a10 PE=1 SV=2	sp|P08516|CP4AA_RAT	58 kDa	1	1
Neutral cholesterol ester hydrolase 1 OS=Rattus norvegicus GN=Nceh1 PE=2 SV=1	sp|B2GV54|NCEH1_RAT	46 kDa	1	1
Trans-Golgi network integral membrane protein TGN38 OS=Rattus norvegicus GN=Ttgn1 PE=1 SV=1	sp|P19814|TGON3_RAT	38 kDa	1	1
[3-methyl-2-oxobutanoate dehydrogenase [lipoamide]] kinase, mitochondrial OS=Rattus norvegicus GN=Bckdk PE=1 SV=2	sp|Q00972|BCKD_RAT	46 kDa	1	1
Zinc transporter 1 OS=Rattus norvegicus GN=Slc30a1 PE=2 SV=1	sp|Q62720|ZNT1_RAT	55 kDa	1	1
Cluster of Small ubiquitin-related modifier 2 OS=Rattus norvegicus GN=Sumo2 PE=1 SV=1 (sp|P61959|SUMO2_RAT)	sp|P61959|SUMO2_RAT	11 kDa	1	1.1
Transmembrane 9 superfamily member 1 OS=Rattus norvegicus GN=Tm9sf1 PE=2 SV=1	sp|Q66HF2|TM9S1_RAT	67 kDa	1	0.9
RAF proto-oncogene serine/threonine-protein kinase OS=Rattus norvegicus GN=Raf1 PE=1 SV=1	sp|P11345|RAF1_RAT	73 kDa	1	1.1
Cytoplasmic dynein 1 light intermediate chain 2 OS=Rattus norvegicus GN=Dync1li2 PE=1 SV=1	sp|Q62698|DC1L2_RAT	55 kDa	1	1
RNA polymerase II-associated factor 1 homolog OS=Rattus norvegicus GN=Paf1 PE=2 SV=1	sp|Q4V886|PAF1_RAT	61 kDa	1	1.1
Protein Z-dependent protease inhibitor OS=Rattus norvegicus GN=Serpina10 PE=2 SV=2	sp|Q62975|ZPI_RAT	50 kDa	1	1.1
Serine/threonine-protein kinase 24 OS=Rattus norvegicus GN=Stk24 PE=2 SV=1	sp|B0LT89|STK24_RAT	48 kDa	1	1
Synaptosomal-associated protein 29 OS=Rattus norvegicus GN=Snap29 PE=1 SV=1	sp|Q9Z2P6|SNP29_RAT	29 kDa	1	0.9
Mitochondrial import receptor subunit TOM20 homolog OS=Rattus norvegicus GN=Tomm20 PE=1 SV=2	sp|Q62760|TOM20_RAT	16 kDa	1	0.8
UDP-glucose 4-epimerase OS=Rattus norvegicus GN=Gale PE=2 SV=1	sp|P18645|GALE_RAT	38 kDa	1	1.5
Golgi SNAP receptor complex member 2 OS=Rattus norvegicus GN=Gosr2 PE=1 SV=2	sp|O35165|GOSR2_RAT	25 kDa	1	1.1
Maspardin OS=Rattus norvegicus GN=Spg21 PE=2 SV=1	sp|Q5XIC4|SPG21_RAT	30 kDa	1	0.8
Interleukin enhancer-binding factor 2 OS=Rattus norvegicus GN=Ilf2 PE=2 SV=1	sp|Q7TP98|ILF2_RAT	51 kDa	1	1.5
Collagen alpha-1(II) chain OS=Rattus norvegicus GN=Col2a1 PE=1 SV=2	sp|P05539|CO2A1_RAT	135 kDa	1	3.7
Elongator complex protein 1 OS=Rattus norvegicus GN=Ikbkap PE=2 SV=1	sp|Q8VHU4|ELP1_RAT	149 kDa	1	0.9
Splicing factor, arginine/serine-rich 19 OS=Rattus norvegicus GN=Scaf1 PE=1 SV=2	sp|Q63624|SFR19_RAT	134 kDa	1	1
Protein S100-A10 OS=Rattus norvegicus GN=S100a10 PE=1 SV=2	sp|P05943|S10AA_RAT	11 kDa	1	1
GTP-binding protein Rheb OS=Rattus norvegicus GN=Rheb PE=1 SV=1	sp|Q62639|RHEB_RAT	20 kDa	1	1.1
Microtubule-associated protein RP/EB family member 1 OS=Rattus norvegicus GN=Mapre1 PE=1 SV=3	sp|Q66HR2|MARE1_RAT	30 kDa	1	1.1
Leucine-rich repeat-containing protein 8A OS=Rattus norvegicus GN=Lrrc8a PE=2 SV=1	sp|Q4V8I7|LRC8A_RAT	94 kDa	1	1
Cholesterol side-chain cleavage enzyme, mitochondrial OS=Rattus norvegicus GN=Cyp11a1 PE=2 SV=1	sp|P14137|CP11A_RAT	61 kDa	1	0.9
Palmdelphin OS=Rattus norvegicus GN=Palmd PE=1 SV=1	sp|Q4KM62|PALMD_RAT	62 kDa	1	0.8
Rab effector MyRIP OS=Rattus norvegicus GN=Myrip PE=1 SV=1	sp|Q7TNY7|MYRIP_RAT	95 kDa	1	1.3
Focal adhesion kinase 1 OS=Rattus norvegicus GN=Ptk2 PE=1 SV=1	sp|O35346|FAK1_RAT	120 kDa	1	2
Breast carcinoma-amplified sequence 1 homolog (Fragment) OS=Rattus norvegicus GN=Bcas1 PE=1 SV=2	sp|Q3ZB98|BCAS1_RAT	59 kDa	1	0.8
Contactin-2 OS=Rattus norvegicus GN=Cntn2 PE=1 SV=1	sp|P22063|CNTN2_RAT	113 kDa	1	0.9
Complement component receptor 1-like protein OS=Rattus norvegicus GN=Cr1l PE=1 SV=1	sp|Q63135|CR1L_RAT	62 kDa	1	1
Histone H1.5 OS=Rattus norvegicus GN=Hist1h1b PE=3 SV=1	sp|D3ZBN0|H15_RAT	23 kDa	1	1.7
Ig gamma-2C chain C region OS=Rattus norvegicus PE=2 SV=1	sp|P20762|IGG2C_RAT	37 kDa	1	1
Antigen peptide transporter 1 OS=Rattus norvegicus GN=Tap1 PE=1 SV=2	sp|P36370|TAP1_RAT	79 kDa	1	1.1
Secretory carrier-associated membrane protein 1 OS=Rattus norvegicus GN=Scamp1 PE=1 SV=1	sp|P56603|SCAM1_RAT	38 kDa	1	1
Disks large homolog 1 OS=Rattus norvegicus GN=Dlg1 PE=1 SV=1	sp|Q62696|DLG1_RAT	101 kDa	1	1
Splicing factor 3B subunit 4 OS=Rattus norvegicus GN=Sf3b4 PE=2 SV=1	sp|Q6AYL5|SF3B4_RAT	44 kDa	1	1.3
Mitogen-activated protein kinase 3 OS=Rattus norvegicus GN=Mapk3 PE=1 SV=5	sp|P21708|MK03_RAT	43 kDa	1	1.3
Phenylalanine--tRNA ligase, mitochondrial OS=Rattus norvegicus GN=Fars2 PE=2 SV=1	sp|Q6AYQ3|SYFM_RAT	55 kDa	1	1.1
Prostamide/prostaglandin F synthase OS=Rattus norvegicus GN=Fam213b PE=3 SV=1	sp|D3ZVR7|PGFS_RAT	22 kDa	1	1
Cysteine-rich with EGF-like domain protein 1 OS=Rattus norvegicus GN=Creld1 PE=2 SV=1	sp|Q4V7F2|CREL1_RAT	46 kDa	1	1
Prenylated Rab acceptor protein 1 OS=Rattus norvegicus GN=Rabac1 PE=1 SV=1	sp|O35394|PRAF1_RAT	21 kDa	1	0.9
cGMP-dependent 3',5'-cyclic phosphodiesterase OS=Rattus norvegicus GN=Pde2a PE=1 SV=2	sp|Q01062|PDE2A_RAT	105 kDa	1	0.8
Copper chaperone for superoxide dismutase OS=Rattus norvegicus GN=Ccs PE=1 SV=1	sp|Q9JK72|CCS_RAT	29 kDa	1	0.8
AP-2 complex subunit sigma OS=Rattus norvegicus GN=Ap2s1 PE=2 SV=1	sp|P62744|AP2S1_RAT	17 kDa	1	1
Exocyst complex component 7 OS=Rattus norvegicus GN=Exoc7 PE=2 SV=1	sp|O54922|EXOC7_RAT	75 kDa	1	1.3
Amidophosphoribosyltransferase OS=Rattus norvegicus GN=Ppat PE=1 SV=1	sp|P35433|PUR1_RAT	57 kDa	1	1
Carbonic anhydrase-related protein OS=Rattus norvegicus GN=Ca8 PE=1 SV=3	sp|Q5PPN4|CAH8_RAT	33 kDa	1	0.8
Myosin-3 OS=Rattus norvegicus GN=Myh3 PE=2 SV=1	sp|P12847|MYH3_RAT	224 kDa	1	0.8
Protein farnesyltransferase/geranylgeranyltransferase type-1 subunit alpha OS=Rattus norvegicus GN=Fnta PE=1 SV=1	sp|Q04631|FNTA_RAT	44 kDa	1	0.9
Glucose-6-phosphatase OS=Rattus norvegicus GN=G6pc PE=2 SV=1	sp|P43428|G6PC_RAT	41 kDa	1	1.2
Homeodomain-interacting protein kinase 4 OS=Rattus norvegicus GN=Hipk4 PE=2 SV=1	sp|Q4V793|HIPK4_RAT	69 kDa	1	1.7
Lipid phosphate phosphohydrolase 3 OS=Rattus norvegicus GN=Ppap2b PE=1 SV=1	sp|P97544|LPP3_RAT	35 kDa	1	1
Bone marrow stromal antigen 2 OS=Rattus norvegicus GN=Bst2 PE=1 SV=1	sp|Q811A2|BST2_RAT	20 kDa	1	1
Brain-specific angiogenesis inhibitor 1-associated protein 2 OS=Rattus norvegicus GN=Baiap2 PE=1 SV=1	sp|Q6GMN2|BAIP2_RAT	59 kDa	1	0.9
Methionine synthase OS=Rattus norvegicus GN=Mtr PE=2 SV=1	sp|Q9Z2Q4|METH_RAT	139 kDa	1	1
Gametogenetin OS=Rattus norvegicus GN=Ggn PE=2 SV=1	sp|Q66HC8|GGN_RAT	68 kDa	1	1.6
Syndecan-2 OS=Rattus norvegicus GN=Sdc2 PE=2 SV=2	sp|P34900|SDC2_RAT	22 kDa	1	1
Fanconi anemia group D2 protein homolog OS=Rattus norvegicus GN=Fancd2 PE=2 SV=2	sp|Q6IV68|FACD2_RAT	164 kDa	1	0.6
Cluster of Solute carrier family 12 member 4 OS=Rattus norvegicus GN=Slc12a4 PE=1 SV=1 (sp|Q63632|S12A4_RAT)	sp|Q63632|S12A4_RAT	121 kDa	1	1.1
Solute carrier family 12 member 4 OS=Rattus norvegicus GN=Slc12a4 PE=1 SV=1	sp|Q63632|S12A4_RAT	121 kDa	1	1.1
Excitatory amino acid transporter 2 OS=Rattus norvegicus GN=Slc1a2 PE=1 SV=2	sp|P31596|EAA2_RAT	62 kDa	1	1
SID1 transmembrane family member 2 OS=Rattus norvegicus GN=Sidt2 PE=1 SV=2	sp|D3ZEH5|SIDT2_RAT	95 kDa	1	1.2
Dual specificity mitogen-activated protein kinase kinase 1 OS=Rattus norvegicus GN=Map2k1 PE=1 SV=2	sp|Q01986|MP2K1_RAT	43 kDa	1	1.1
NADH dehydrogenase (ubiquinone) complex I, assembly factor 6 OS=Rattus norvegicus GN=Ndufaf6 PE=3 SV=1	sp|D3ZN43|NDUF6_RAT	39 kDa	1	1.2
Protein lin-7 homolog A OS=Rattus norvegicus GN=Lin7a PE=1 SV=2	sp|Q9Z250|LIN7A_RAT	26 kDa	1	1
Cholesterol 7-alpha-monooxygenase OS=Rattus norvegicus GN=Cyp7a1 PE=1 SV=1	sp|P18125|CP7A1_RAT	57 kDa	1	0.7
Glutathione peroxidase 3 OS=Rattus norvegicus GN=Gpx3 PE=2 SV=2	sp|P23764|GPX3_RAT	25 kDa	1	1
Galectin-8 OS=Rattus norvegicus GN=Lgals8 PE=2 SV=1	sp|Q62665|LEG8_RAT	36 kDa	1	0.6
Solute carrier organic anion transporter family member 2B1 OS=Rattus norvegicus GN=Slco2b1 PE=1 SV=1	sp|Q9JHI3|SO2B1_RAT	74 kDa	1	1
Alpha-1,6-mannosyl-glycoprotein 2-beta-N-acetylglucosaminyltransferase OS=Rattus norvegicus GN=Mgat2 PE=1 SV=1	sp|Q09326|MGAT2_RAT	51 kDa	1	1.3
Acidic leucine-rich nuclear phosphoprotein 32 family member E OS=Rattus norvegicus GN=Anp32e PE=2 SV=1	sp|Q5XIE0|AN32E_RAT	29 kDa	1	1.1
UPF0670 protein THEM6 homolog OS=Rattus norvegicus GN=Them6 PE=2 SV=1	sp|Q5XIE1|THEM6_RAT	24 kDa	1	0.9
ADP-sugar pyrophosphatase OS=Rattus norvegicus GN=Nudt5 PE=2 SV=1	sp|Q6AY63|NUDT5_RAT	24 kDa	1	1.1
Galactose-1-phosphate uridylyltransferase OS=Rattus norvegicus GN=Galt PE=2 SV=1	sp|P43424|GALT_RAT	43 kDa	1	1.6
CD48 antigen OS=Rattus norvegicus GN=Cd48 PE=1 SV=1	sp|P10252|CD48_RAT	28 kDa	1	0.8
Inhibitor of nuclear factor kappa-B kinase-interacting protein OS=Rattus norvegicus GN=Ikbip PE=2 SV=1	sp|Q5EAJ6|IKIP_RAT	42 kDa	1	0.8
Coronin-1A OS=Rattus norvegicus GN=Coro1a PE=1 SV=3	sp|Q91ZN1|COR1A_RAT	51 kDa	1	1.3
Thioredoxin domain-containing protein 12 OS=Rattus norvegicus GN=Txndc12 PE=2 SV=2	sp|Q498E0|TXD12_RAT	19 kDa	1	1
Hippocalcin-like protein 1 OS=Rattus norvegicus GN=Hpcal1 PE=1 SV=2	sp|P62749|HPCL1_RAT	22 kDa	1	1
Palmitoyl-protein thioesterase 1 OS=Rattus norvegicus GN=Ppt1 PE=1 SV=1	sp|P45479|PPT1_RAT	34 kDa	1	0.9
Rho guanine nucleotide exchange factor 11 OS=Rattus norvegicus GN=Arhgef11 PE=1 SV=1	sp|Q9ES67|ARHGB_RAT	169 kDa	1	2.4
Unconventional myosin-IXa OS=Rattus norvegicus GN=Myo9a PE=1 SV=1	sp|Q9Z1N3|MYO9A_RAT	301 kDa	1	0.6
Ethanolamine kinase 2 OS=Rattus norvegicus GN=Etnk2 PE=3 SV=1	sp|D3ZRW8|EKI2_RAT	45 kDa	1	1
Eukaryotic elongation factor 2 kinase OS=Rattus norvegicus GN=Eef2k PE=1 SV=1	sp|P70531|EF2K_RAT	81 kDa	1	0.8
Spermatogenesis associated 6-like protein OS=Rattus norvegicus GN=Spata6l PE=2 SV=1	sp|Q6AYJ3|SPA6L_RAT	46 kDa	1	1.2
Choline transporter-like protein 2 OS=Rattus norvegicus GN=Slc44a2 PE=2 SV=1	sp|B4F795|CTL2_RAT	80 kDa	1	0.9
Cleavage and polyadenylation specificity factor subunit 5 OS=Rattus norvegicus GN=Nudt21 PE=2 SV=1	sp|Q4KM65|CPSF5_RAT	26 kDa	1	0.8
Chromodomain-helicase-DNA-binding protein 8 OS=Rattus norvegicus GN=Chd8 PE=1 SV=2	sp|Q9JIX5|CHD8_RAT	291 kDa	1	1
Keratin, type II cytoskeletal 72 OS=Rattus norvegicus GN=Krt72 PE=2 SV=2	sp|Q6IG04|K2C72_RAT	57 kDa	1	0.8
ATP-binding cassette sub-family D member 2 OS=Rattus norvegicus GN=Abcd2 PE=2 SV=1	sp|Q9QY44|ABCD2_RAT	83 kDa	1	1.5
Soluble calcium-activated nucleotidase 1 OS=Rattus norvegicus GN=Cant1 PE=1 SV=1	sp|Q8K4Y7|CANT1_RAT	46 kDa	1	0.9
Gamma-aminobutyric acid receptor-associated protein-like 2 OS=Rattus norvegicus GN=Gabarapl2 PE=2 SV=1	sp|P60522|GBRL2_RAT	14 kDa	1	1
Neurexin-3-alpha OS=Rattus norvegicus GN=Nrxn3 PE=1 SV=1	sp|Q07310|NRX3A_RAT	174 kDa	1	13
Syntaxin-binding protein 1 OS=Rattus norvegicus GN=Stxbp1 PE=1 SV=1	sp|P61765|STXB1_RAT	68 kDa	1	1
Sodium-coupled neutral amino acid transporter 4 OS=Rattus norvegicus GN=Slc38a4 PE=2 SV=1	sp|Q9EQ25|S38A4_RAT	61 kDa	1	1.1
Uncharacterized aarF domain-containing protein kinase 4 OS=Rattus norvegicus GN=Adck4 PE=2 SV=1	sp|Q6AY19|ADCK4_RAT	59 kDa	1	1.1
Ribonuclease 4 OS=Rattus norvegicus GN=Rnase4 PE=1 SV=1	sp|O55004|RNAS4_RAT	17 kDa	1	1.1
Interferon-inducible double stranded RNA-dependent protein kinase activator A OS=Rattus norvegicus GN=Prkra PE=1 SV=1	sp|Q4V8C7|PRKRA_RAT	34 kDa	1	1
Apolipoprotein M OS=Rattus norvegicus GN=Apom PE=1 SV=2	sp|P14630|APOM_RAT	22 kDa	1	1.3
Guanine nucleotide-binding protein-like 3 OS=Rattus norvegicus GN=Gnl3 PE=1 SV=1	sp|Q811S9|GNL3_RAT	61 kDa	1	0.7
28S ribosomal protein L42, mitochondrial OS=Rattus norvegicus GN=Mrpl42 PE=1 SV=1	sp|P0C2B9|RM42_RAT	16 kDa	1	1
Apolipoprotein A-V OS=Rattus norvegicus GN=Apoa5 PE=2 SV=1	sp|Q9QUH3|APOA5_RAT	41 kDa	1	1
DNA damage-regulated autophagy modulator protein 2 OS=Rattus norvegicus GN=Dram2 PE=2 SV=1	sp|Q5BK09|DRAM2_RAT	30 kDa	1	1.4
Solute carrier family 25 member 46 OS=Rattus norvegicus GN=Slc25a46 PE=2 SV=2	sp|Q5EB62|S2546_RAT	46 kDa	1	0.7
BRISC and BRCA1-A complex member 1 OS=Rattus norvegicus GN=Babam1 PE=2 SV=1	sp|Q5XIJ6|BABA1_RAT	37 kDa	1	0.9
Mast cell protease 2 OS=Rattus norvegicus GN=Mcpt2 PE=1 SV=1	sp|P00770|MCPT2_RAT	27 kDa	1	1
Mast cell protease 1 OS=Rattus norvegicus GN=Mcpt1 PE=1 SV=3	sp|P09650|MCPT1_RAT	29 kDa	1	1.6
tRNA modification GTPase GTPBP3, mitochondrial OS=Rattus norvegicus GN=Gtpbp3 PE=2 SV=1	sp|Q5PQQ1|GTPB3_RAT	52 kDa	1	1.2
Centrosomal protein of 63 kDa OS=Rattus norvegicus GN=Cep63 PE=2 SV=1	sp|Q4KLY0|CEP63_RAT	63 kDa	1	1.7
Crooked neck-like protein 1 OS=Rattus norvegicus GN=Crnkl1 PE=2 SV=1	sp|P63155|CRNL1_RAT	83 kDa	1	1.2
39S ribosomal protein L30, mitochondrial OS=Rattus norvegicus GN=Mrpl30 PE=1 SV=1	sp|P0C2C1|RM30_RAT	18 kDa	1	1.1
Transmembrane 6 superfamily member 2 OS=Rattus norvegicus GN=Tm6sf2 PE=2 SV=1	sp|B0BNG2|TM6S2_RAT	43 kDa	1	0.8
Cadherin-related family member 1 OS=Rattus norvegicus GN=Cdhr1 PE=2 SV=1	sp|Q91XU7|CDHR1_RAT	94 kDa	1	1.3
Neurexin-2-alpha OS=Rattus norvegicus GN=Nrxn2 PE=1 SV=3	sp|Q63374|NRX2A_RAT	185 kDa	1	1.1
F-box/WD repeat-containing protein 5 OS=Rattus norvegicus GN=Fbxw5 PE=2 SV=1	sp|Q4KLI9|FBXW5_RAT	64 kDa	1	1.2
Pyridoxal phosphate phosphatase OS=Rattus norvegicus GN=Pdxp PE=1 SV=2	sp|Q8VD52|PLPP_RAT	33 kDa	1	0.5
Aldo-keto reductase family 1 member C21 OS=Rattus norvegicus GN=Akr1c21 PE=2 SV=1	sp|Q6AYQ2|AK1CL_RAT	36 kDa	1	1.3
Unconventional myosin-Ia (Fragment) OS=Rattus norvegicus GN=Myo1a PE=2 SV=1	sp|Q62774|MYO1A_RAT	97 kDa	1	1.3
Microtubule-associated protein RP/EB family member 3 OS=Rattus norvegicus GN=Mapre3 PE=1 SV=1	sp|Q5XIT1|MARE3_RAT	32 kDa	1	1
Alsin OS=Rattus norvegicus GN=Als2 PE=2 SV=1	sp|P0C5Y8|ALS2_RAT	182 kDa	1	1
LIX1-like protein OS=Rattus norvegicus GN=Lix1l PE=2 SV=1	sp|Q5PQQ7|LIX1L_RAT	37 kDa	1	1
Protein kinase C and casein kinase substrate in neurons protein 1 OS=Rattus norvegicus GN=Pacsin1 PE=1 SV=1	sp|Q9Z0W5|PACN1_RAT	50 kDa	1	1.5
Solute carrier family 22 member 18 OS=Rattus norvegicus GN=Slc22a18 PE=2 SV=2	sp|Q6AY78|S22AI_RAT	43 kDa	1	0.9
Metallothionein-2 OS=Rattus norvegicus GN=Mt2 PE=1 SV=1	sp|P04355|MT2_RAT	6 kDa	1	1.5
Methionine adenosyltransferase 2 subunit beta OS=Rattus norvegicus GN=Mat2b PE=2 SV=1	sp|Q5U2R0|MAT2B_RAT	37 kDa	1	1.2
Galectin-2 OS=Rattus norvegicus GN=Lgals2 PE=2 SV=1	sp|Q9Z144|LEG2_RAT	15 kDa	1	1.3
RING finger protein 114 OS=Rattus norvegicus GN=Rnf114 PE=2 SV=1	sp|Q6J2U6|RN114_RAT	26 kDa	1	0.9
Methylthioribose-1-phosphate isomerase OS=Rattus norvegicus GN=Mri1 PE=2 SV=1	sp|Q5HZE4|MTNA_RAT	40 kDa	1	0.9
Mitofusin-1 OS=Rattus norvegicus GN=Mfn1 PE=1 SV=1	sp|Q8R4Z9|MFN1_RAT	84 kDa	1	0.7
Vacuolar protein sorting-associated protein 28 homolog OS=Rattus norvegicus GN=Vps28 PE=2 SV=1	sp|B5DEN9|VPS28_RAT	26 kDa	1	0.9
Heat shock factor-binding protein 1 OS=Rattus norvegicus GN=Hsbp1 PE=3 SV=1	sp|Q8K3X8|HSBP1_RAT	9 kDa	1	0.8
1-phosphatidylinositol 4,5-bisphosphate phosphodiesterase beta-1 OS=Rattus norvegicus GN=Plcb1 PE=1 SV=1	sp|P10687|PLCB1_RAT	138 kDa	1	1
Sideroflexin-3 OS=Rattus norvegicus GN=Sfxn3 PE=2 SV=1	sp|Q9JHY2|SFXN3_RAT	35 kDa	1	0.8
Tyrosine-protein kinase SYK OS=Rattus norvegicus GN=Syk PE=1 SV=1	sp|Q64725|KSYK_RAT	72 kDa	1	1.5
Protein MEMO1 OS=Rattus norvegicus GN=Memo1 PE=2 SV=1	sp|Q4QQR9|MEMO1_RAT	34 kDa	1	1.9
TSC22 domain family protein 4 OS=Rattus norvegicus GN=Tsc22d4 PE=2 SV=1	sp|Q3B8N7|T22D4_RAT	40 kDa	1	0.7
Charged multivesicular body protein 3 OS=Rattus norvegicus GN=Chmp3 PE=1 SV=3	sp|Q8CGS4|CHMP3_RAT	25 kDa	1	1.4
E3 SUMO-protein ligase PIAS3 OS=Rattus norvegicus GN=Pias3 PE=1 SV=2	sp|O70260|PIAS3_RAT	68 kDa	1	1.1
Cystic fibrosis transmembrane conductance regulator OS=Rattus norvegicus GN=Cftr PE=1 SV=3	sp|P34158|CFTR_RAT	168 kDa	1	7
Nucleolar GTP-binding protein 1 OS=Rattus norvegicus GN=Gtpbp4 PE=2 SV=3	sp|Q99P77|NOG1_RAT	74 kDa	1	0.9
Protein RER1 OS=Rattus norvegicus GN=Rer1 PE=2 SV=1	sp|Q498C8|RER1_RAT	23 kDa	1	1.1
Diacylglycerol O-acyltransferase 1 OS=Rattus norvegicus GN=Dgat1 PE=2 SV=1	sp|Q9ERM3|DGAT1_RAT	57 kDa	1	0.8
Matrix metalloproteinase-9 OS=Rattus norvegicus GN=Mmp9 PE=2 SV=1	sp|P50282|MMP9_RAT	79 kDa	1	1
Protein phosphatase 1 regulatory subunit 12A OS=Rattus norvegicus GN=Ppp1r12a PE=1 SV=2	sp|Q10728|MYPT1_RAT	115 kDa	1	1.1
Guanine nucleotide-binding protein G(I)/G(S)/G(O) subunit gamma-8 OS=Rattus norvegicus GN=Gng8 PE=2 SV=1	sp|P63077|GBG8_RAT	8 kDa	1	4.1
Protein kinase C eta type OS=Rattus norvegicus GN=Prkch PE=2 SV=1	sp|Q64617|KPCL_RAT	78 kDa	1	2.1
Diphosphoinositol polyphosphate phosphohydrolase 2 OS=Rattus norvegicus GN=Nudt4 PE=2 SV=1	sp|Q99MY2|NUDT4_RAT	20 kDa	1	0.8
LYR motif-containing protein 1 OS=Rattus norvegicus GN=Lyrm1 PE=2 SV=1	sp|B2RYU8|LYRM1_RAT	14 kDa	1	1.1
Type I iodothyronine deiodinase OS=Rattus norvegicus GN=Dio1 PE=1 SV=2	sp|P24389|IOD1_RAT	30 kDa	1	1.1
Phospholipase D3 OS=Rattus norvegicus GN=Pld3 PE=2 SV=1	sp|Q5FVH2|PLD3_RAT	54 kDa	1	1.3
PIH1 domain-containing protein 1 OS=Rattus norvegicus GN=Pih1d1 PE=2 SV=1	sp|Q4V7F5|PIHD1_RAT	32 kDa	1	1.1
N(G),N(G)-dimethylarginine dimethylaminohydrolase 2 OS=Rattus norvegicus GN=Ddah2 PE=1 SV=1	sp|Q6MG60|DDAH2_RAT	30 kDa	1	1.1
Abhydrolase domain-containing protein 10, mitochondrial OS=Rattus norvegicus GN=Abhd10 PE=1 SV=2	sp|Q5I0K5|ABHDA_RAT	33 kDa	1	0.9
PC4 and SFRS1-interacting protein OS=Rattus norvegicus GN=Psip1 PE=2 SV=1	sp|Q812D1|PSIP1_RAT	60 kDa	1	1.1
Zinc finger with UFM1-specific peptidase domain protein OS=Rattus norvegicus GN=Zufsp PE=2 SV=1	sp|Q5U2S3|ZUFSP_RAT	66 kDa	1	0.8
HCLS1-associated protein X-1 OS=Rattus norvegicus GN=Hax1 PE=1 SV=1	sp|Q7TSE9|HAX1_RAT	31 kDa	1	1.2
Splicing factor, arginine/serine-rich 15 (Fragment) OS=Rattus norvegicus GN=Scaf4 PE=2 SV=1	sp|Q63627|SFR15_RAT	114 kDa	1	0.7
Mothers against decapentaplegic homolog 1 OS=Rattus norvegicus GN=Smad1 PE=1 SV=1	sp|P97588|SMAD1_RAT (+1)	53 kDa	1	0.8
ORM1-like protein 3 OS=Rattus norvegicus GN=Ormdl3 PE=2 SV=2	sp|Q6QI25|ORML3_RAT	17 kDa	1	1.1
Serum deprivation-response protein OS=Rattus norvegicus GN=Sdpr PE=1 SV=3	sp|Q66H98|SDPR_RAT	46 kDa	1	1.3
28S ribosomal protein S15, mitochondrial OS=Rattus norvegicus GN=Mrps15 PE=2 SV=1	sp|Q5XI37|RT15_RAT	30 kDa	1	1.2
39S ribosomal protein L10, mitochondrial OS=Rattus norvegicus GN=Mrpl10 PE=1 SV=1	sp|P0C2C4|RM10_RAT	30 kDa	1	1.1
Transcription elongation factor, mitochondrial OS=Rattus norvegicus GN=Tefm PE=2 SV=1	sp|Q4KM51|TEFM_RAT	42 kDa	1	1.1
HSPB1-associated protein 1 OS=Rattus norvegicus GN=Hspbap1 PE=1 SV=1	sp|Q5BKC6|HBAP1_RAT	54 kDa	1	1.1
Regulator of telomere elongation helicase 1 OS=Rattus norvegicus GN=Rtel1 PE=2 SV=2	sp|Q5RJZ1|RTEL1_RAT	142 kDa	1	1
NTF2-related export protein 2 OS=Rattus norvegicus GN=Nxt2 PE=2 SV=1	sp|B2GV77|NXT2_RAT	16 kDa	1	79.5
Insulin receptor substrate 1 OS=Rattus norvegicus GN=Irs1 PE=1 SV=1	sp|P35570|IRS1_RAT	131 kDa	1	1.2
Fibroblast growth factor receptor 1 OS=Rattus norvegicus GN=Fgfr1 PE=1 SV=1	sp|Q04589|FGFR1_RAT	92 kDa	1	0.7
Serine/threonine-protein kinase MAK OS=Rattus norvegicus GN=Mak PE=1 SV=2	sp|P20793|MAK_RAT	70 kDa	1	1.4
Keratin, type I cytoskeletal 39 OS=Rattus norvegicus GN=Krt39 PE=2 SV=1	sp|Q6IFW3|K1C39_RAT	54 kDa	1	0.6
Spectrin beta chain, non-erythrocytic 2 OS=Rattus norvegicus GN=Sptbn2 PE=1 SV=2	sp|Q9QWN8|SPTN2_RAT	271 kDa	1	1.1
Sorting and assembly machinery component 50 homolog OS=Rattus norvegicus GN=Samm50 PE=1 SV=1	sp|Q6AXV4|SAM50_RAT	52 kDa	1	0.9
Fatty acid synthase OS=Rattus norvegicus GN=Fasn PE=1 SV=3	sp|P12785|FAS_RAT	273 kDa	1	1.1
Delta-1-pyrroline-5-carboxylate dehydrogenase, mitochondrial OS=Rattus norvegicus GN=Aldh4a1 PE=1 SV=1	sp|P0C2X9|AL4A1_RAT	62 kDa	1	1
Aspartate aminotransferase, mitochondrial OS=Rattus norvegicus GN=Got2 PE=1 SV=2	sp|P00507|AATM_RAT	47 kDa	1	1.1
Cluster of Tubulin beta-4B chain OS=Rattus norvegicus GN=Tubb4b PE=1 SV=1 (sp|Q6P9T8|TBB4B_RAT)	sp|Q6P9T8|TBB4B_RAT [4]	50 kDa	1	0.8
Dimethylglycine dehydrogenase, mitochondrial OS=Rattus norvegicus GN=Dmgdh PE=1 SV=1	sp|Q63342|M2GD_RAT	96 kDa	1	1.1
4-hydroxyphenylpyruvate dioxygenase OS=Rattus norvegicus GN=Hpd PE=1 SV=3	sp|P32755|HPPD_RAT	45 kDa	1	1.2
Cluster of Heat shock cognate 71 kDa protein OS=Rattus norvegicus GN=Hspa8 PE=1 SV=1 (sp|P63018|HSP7C_RAT)	sp|P63018|HSP7C_RAT [4]	71 kDa	1	1.1
Long-chain specific acyl-CoA dehydrogenase, mitochondrial OS=Rattus norvegicus GN=Acadl PE=1 SV=1	sp|P15650|ACADL_RAT	48 kDa	1	1
Cluster of Retinol dehydrogenase 3 OS=Rattus norvegicus GN=Rdh3 PE=1 SV=1 (sp|P50169|RDH3_RAT)	sp|P50169|RDH3_RAT [3]	36 kDa	1	1
Cluster of Glutathione S-transferase Mu 2 OS=Rattus norvegicus GN=Gstm2 PE=1 SV=2 (sp|P08010|GSTM2_RAT)	sp|P08010|GSTM2_RAT [3]	26 kDa	1	1
Choline dehydrogenase, mitochondrial OS=Rattus norvegicus GN=Chdh PE=1 SV=1	sp|Q6UPE0|CHDH_RAT	66 kDa	1	0.8
Very long-chain specific acyl-CoA dehydrogenase, mitochondrial OS=Rattus norvegicus GN=Acadvl PE=1 SV=1	sp|P45953|ACADV_RAT	71 kDa	1	0.9
Regucalcin OS=Rattus norvegicus GN=Rgn PE=1 SV=3	sp|Q03336|RGN_RAT	33 kDa	1	1.1
Peroxisomal bifunctional enzyme OS=Rattus norvegicus GN=Ehhadh PE=1 SV=2	sp|P07896|ECHP_RAT	79 kDa	1	1.2
Electron transfer flavoprotein subunit beta OS=Rattus norvegicus GN=Etfb PE=2 SV=3	sp|Q68FU3|ETFB_RAT	28 kDa	1	1.2
Cluster of Elongation factor 1-alpha 1 OS=Rattus norvegicus GN=Eef1a1 PE=1 SV=1 (sp|P62630|EF1A1_RAT)	sp|P62630|EF1A1_RAT [2]	50 kDa	1	1
Peroxisomal acyl-coenzyme A oxidase 1 OS=Rattus norvegicus GN=Acox1 PE=1 SV=1	sp|P07872|ACOX1_RAT	75 kDa	1	1
Thiosulfate sulfurtransferase OS=Rattus norvegicus GN=Tst PE=1 SV=3	sp|P24329|THTR_RAT	33 kDa	1	1.2
Serotransferrin OS=Rattus norvegicus GN=Tf PE=1 SV=3	sp|P12346|TRFE_RAT	76 kDa	1	1.1
Apoptosis-inducing factor 1, mitochondrial OS=Rattus norvegicus GN=Aifm1 PE=1 SV=1	sp|Q9JM53|AIFM1_RAT	67 kDa	1	1
4-trimethylaminobutyraldehyde dehydrogenase OS=Rattus norvegicus GN=Aldh9a1 PE=1 SV=1	sp|Q9JLJ3|AL9A1_RAT	54 kDa	1	1.2
Aconitate hydratase, mitochondrial OS=Rattus norvegicus GN=Aco2 PE=1 SV=2	sp|Q9ER34|ACON_RAT	85 kDa	1	1
L-lactate dehydrogenase A chain OS=Rattus norvegicus GN=Ldha PE=1 SV=1	sp|P04642|LDHA_RAT	36 kDa	1	1
Elongation factor 2 OS=Rattus norvegicus GN=Eef2 PE=1 SV=4	sp|P05197|EF2_RAT	95 kDa	1	1.2
Cluster of ADP/ATP translocase 2 OS=Rattus norvegicus GN=Slc25a5 PE=1 SV=3 (sp|Q09073|ADT2_RAT)	sp|Q09073|ADT2_RAT [2]	33 kDa	1	0.8
Annexin A6 OS=Rattus norvegicus GN=Anxa6 PE=1 SV=2	sp|P48037|ANXA6_RAT	76 kDa	1	1.1
Vigilin OS=Rattus norvegicus GN=Hdlbp PE=1 SV=1	sp|Q9Z1A6|VIGLN_RAT	142 kDa	1	1.2
Transketolase OS=Rattus norvegicus GN=Tkt PE=1 SV=1	sp|P50137|TKT_RAT	68 kDa	1	1.3
2-oxoglutarate dehydrogenase, mitochondrial OS=Rattus norvegicus GN=Ogdh PE=1 SV=1	sp|Q5XI78|ODO1_RAT	116 kDa	1	1
Cytochrome P450 2C7 OS=Rattus norvegicus GN=Cyp2c7 PE=1 SV=2	sp|P05179|CP2C7_RAT	56 kDa	1	1.3
Fumarate hydratase, mitochondrial OS=Rattus norvegicus GN=Fh PE=1 SV=1	sp|P14408|FUMH_RAT	54 kDa	1	0.9
Leucine-rich PPR motif-containing protein, mitochondrial OS=Rattus norvegicus GN=Lrpprc PE=1 SV=1	sp|Q5SGE0|LPPRC_RAT	157 kDa	1	0.9
Trifunctional enzyme subunit beta, mitochondrial OS=Rattus norvegicus GN=Hadhb PE=1 SV=1	sp|Q60587|ECHB_RAT	51 kDa	1	1
Elongation factor Tu, mitochondrial OS=Rattus norvegicus GN=Tufm PE=1 SV=1	sp|P85834|EFTU_RAT	50 kDa	1	0.9
Carboxylesterase 1D OS=Rattus norvegicus GN=Ces1d PE=1 SV=2	sp|P16303|CES1D_RAT	62 kDa	1	0.9
Catechol O-methyltransferase OS=Rattus norvegicus GN=Comt PE=1 SV=2	sp|P22734|COMT_RAT	30 kDa	1	1.1
Prohibitin OS=Rattus norvegicus GN=Phb PE=1 SV=1	sp|P67779|PHB_RAT	30 kDa	1	1
Cluster of 3 beta-hydroxysteroid dehydrogenase type 5 OS=Rattus norvegicus GN=Hsd3b5 PE=2 SV=3 (sp|P27364|3BHS5_RAT)	sp|P27364|3BHS5_RAT [2]	42 kDa	1	0.8
Omega-amidase NIT2 OS=Rattus norvegicus GN=Nit2 PE=1 SV=1	sp|Q497B0|NIT2_RAT	31 kDa	1	1
Prelamin-A/C OS=Rattus norvegicus GN=Lmna PE=1 SV=1	sp|P48679|LMNA_RAT	74 kDa	1	1
Argininosuccinate lyase OS=Rattus norvegicus GN=Asl PE=2 SV=1	sp|P20673|ARLY_RAT	52 kDa	1	1.2
Heat shock protein 75 kDa, mitochondrial OS=Rattus norvegicus GN=Trap1 PE=1 SV=1	sp|Q5XHZ0|TRAP1_RAT	80 kDa	1	0.9
Cytochrome c oxidase subunit 4 isoform 1, mitochondrial OS=Rattus norvegicus GN=Cox4i1 PE=1 SV=1	sp|P10888|COX41_RAT	20 kDa	1	0.8
Formimidoyltransferase-cyclodeaminase OS=Rattus norvegicus GN=Ftcd PE=1 SV=4	sp|O88618|FTCD_RAT	59 kDa	1	1
Phenylalanine-4-hydroxylase OS=Rattus norvegicus GN=Pah PE=1 SV=3	sp|P04176|PH4H_RAT	52 kDa	1	1
Cluster of Fatty aldehyde dehydrogenase OS=Rattus norvegicus GN=Aldh3a2 PE=1 SV=1 (sp|P30839|AL3A2_RAT)	sp|P30839|AL3A2_RAT [2]	54 kDa	1	0.9
Cytochrome P450 2C6 OS=Rattus norvegicus GN=Cyp2c6 PE=2 SV=2	sp|P05178|CP2C6_RAT	56 kDa	1	1.2
Carnitine O-palmitoyltransferase 2, mitochondrial OS=Rattus norvegicus GN=Cpt2 PE=1 SV=1	sp|P18886|CPT2_RAT	74 kDa	1	0.8
Apolipoprotein B-100 OS=Rattus norvegicus GN=Apob PE=1 SV=1	sp|Q7TMA5|APOB_RAT	536 kDa	1	0.9
ATP synthase subunit d, mitochondrial OS=Rattus norvegicus GN=Atp5h PE=1 SV=3	sp|P31399|ATP5H_RAT	19 kDa	1	0.9
Peroxiredoxin-1 OS=Rattus norvegicus GN=Prdx1 PE=1 SV=1	sp|Q63716|PRDX1_RAT	22 kDa	1	1.2
Malate dehydrogenase, cytoplasmic OS=Rattus norvegicus GN=Mdh1 PE=1 SV=3	sp|O88989|MDHC_RAT	36 kDa	1	1.2
Heat shock protein HSP 90-alpha OS=Rattus norvegicus GN=Hsp90aa1 PE=1 SV=3	sp|P82995|HS90A_RAT	85 kDa	1	1
Cytochrome P450 2D26 OS=Rattus norvegicus GN=Cyp2d26 PE=2 SV=2	sp|P10634|CP2DQ_RAT	57 kDa	1	0.9
Maleylacetoacetate isomerase OS=Rattus norvegicus GN=Gstz1 PE=1 SV=2	sp|P57113|MAAI_RAT	24 kDa	1	1.1
4-aminobutyrate aminotransferase, mitochondrial OS=Rattus norvegicus GN=Abat PE=1 SV=3	sp|P50554|GABT_RAT	56 kDa	1	1
Peptidyl-prolyl cis-trans isomerase F, mitochondrial OS=Rattus norvegicus GN=Ppif PE=1 SV=2	sp|P29117|PPIF_RAT	22 kDa	1	1.1
Nucleobindin-2 OS=Rattus norvegicus GN=Nucb2 PE=2 SV=1	sp|Q9JI85|NUCB2_RAT	50 kDa	1	0.9
NADH dehydrogenase [ubiquinone] 1 alpha subcomplex subunit 10, mitochondrial OS=Rattus norvegicus GN=Ndufa10 PE=1 SV=1	sp|Q561S0|NDUAA_RAT	40 kDa	1	0.7
Kynurenine/alpha-aminoadipate aminotransferase, mitochondrial OS=Rattus norvegicus GN=Aadat PE=1 SV=1	sp|Q64602|AADAT_RAT	48 kDa	1	1.2
Glycine N-methyltransferase OS=Rattus norvegicus GN=Gnmt PE=1 SV=2	sp|P13255|GNMT_RAT	33 kDa	1	1.3
Amine oxidase [flavin-containing] A OS=Rattus norvegicus GN=Maoa PE=1 SV=1	sp|P21396|AOFA_RAT	60 kDa	1	1.1
Fibrinogen beta chain OS=Rattus norvegicus GN=Fgb PE=1 SV=4	sp|P14480|FIBB_RAT	54 kDa	1	1.1
Cytochrome P450 2B3 OS=Rattus norvegicus GN=Cyp2b3 PE=2 SV=1	sp|P13107|CP2B3_RAT	56 kDa	1	1
Isovaleryl-CoA dehydrogenase, mitochondrial OS=Rattus norvegicus GN=Ivd PE=1 SV=2	sp|P12007|IVD_RAT	46 kDa	1	1.1
Peroxisomal acyl-coenzyme A oxidase 3 OS=Rattus norvegicus GN=Acox3 PE=1 SV=1	sp|Q63448|ACOX3_RAT	78 kDa	1	1
Ubiquitin-like modifier-activating enzyme 1 OS=Rattus norvegicus GN=Uba1 PE=1 SV=1	sp|Q5U300|UBA1_RAT	118 kDa	1	1.2
Plastin-3 OS=Rattus norvegicus GN=Pls3 PE=2 SV=2	sp|Q63598|PLST_RAT	71 kDa	1	1.1
Glutathione S-transferase Mu 1 OS=Rattus norvegicus GN=Gstm1 PE=1 SV=2	sp|P04905|GSTM1_RAT	26 kDa	1	0.9
Corticosteroid 11-beta-dehydrogenase isozyme 1 OS=Rattus norvegicus GN=Hsd11b1 PE=1 SV=2	sp|P16232|DHI1_RAT	32 kDa	1	0.8
Fumarylacetoacetase OS=Rattus norvegicus GN=Fah PE=1 SV=1	sp|P25093|FAAA_RAT	46 kDa	1	1
NADH-cytochrome b5 reductase 3 OS=Rattus norvegicus GN=Cyb5r3 PE=1 SV=2	sp|P20070|NB5R3_RAT	34 kDa	1	0.8
Superoxide dismutase [Mn], mitochondrial OS=Rattus norvegicus GN=Sod2 PE=1 SV=2	sp|P07895|SODM_RAT	25 kDa	1	1.1
Dolichyl-diphosphooligosaccharide--protein glycosyltransferase subunit 2 OS=Rattus norvegicus GN=Rpn2 PE=2 SV=2	sp|P25235|RPN2_RAT	69 kDa	1	1.1
Acetyl-CoA carboxylase 1 OS=Rattus norvegicus GN=Acaca PE=1 SV=1	sp|P11497|ACACA_RAT	265 kDa	1	1.1
Phosphate carrier protein, mitochondrial OS=Rattus norvegicus GN=Slc25a3 PE=1 SV=1	sp|P16036|MPCP_RAT	39 kDa	1	1
60S acidic ribosomal protein P0 OS=Rattus norvegicus GN=Rplp0 PE=1 SV=2	sp|P19945|RLA0_RAT	34 kDa	1	1.1
Succinate-semialdehyde dehydrogenase, mitochondrial OS=Rattus norvegicus GN=Aldh5a1 PE=1 SV=2	sp|P51650|SSDH_RAT	56 kDa	1	1.1
NADPH--cytochrome P450 reductase OS=Rattus norvegicus GN=Por PE=1 SV=3	sp|P00388|NCPR_RAT	77 kDa	1	0.9
Cluster of Vimentin OS=Rattus norvegicus GN=Vim PE=1 SV=2 (sp|P31000|VIME_RAT)	sp|P31000|VIME_RAT [2]	54 kDa	1	0.8
Cytochrome c, somatic OS=Rattus norvegicus GN=Cycs PE=1 SV=2	sp|P62898|CYC_RAT	12 kDa	1	1.1
Cytoplasmic aconitate hydratase OS=Rattus norvegicus GN=Aco1 PE=1 SV=1	sp|Q63270|ACOC_RAT	98 kDa	1	1.1
D-dopachrome decarboxylase OS=Rattus norvegicus GN=Ddt PE=1 SV=3	sp|P80254|DOPD_RAT	13 kDa	1	1
60S ribosomal protein L3 OS=Rattus norvegicus GN=Rpl3 PE=1 SV=3	sp|P21531|RL3_RAT	46 kDa	1	1.2
Bile acyl-CoA synthetase OS=Rattus norvegicus GN=Slc27a5 PE=1 SV=1	sp|Q9ES38|S27A5_RAT	76 kDa	1	1.1
Bile salt export pump OS=Rattus norvegicus GN=Abcb11 PE=1 SV=1	sp|O70127|ABCBB_RAT	146 kDa	1	1.1
Sterol 26-hydroxylase, mitochondrial OS=Rattus norvegicus GN=Cyp27a1 PE=1 SV=1	sp|P17178|CP27A_RAT	61 kDa	1	1
T-complex protein 1 subunit epsilon OS=Rattus norvegicus GN=Cct5 PE=1 SV=1	sp|Q68FQ0|TCPE_RAT	60 kDa	1	0.9
40S ribosomal protein S3 OS=Rattus norvegicus GN=Rps3 PE=2 SV=1	sp|P62909|RS3_RAT	27 kDa	1	1.2
5-oxoprolinase OS=Rattus norvegicus GN=Oplah PE=1 SV=2	sp|P97608|OPLA_RAT	138 kDa	1	0.9
Adenosine kinase OS=Rattus norvegicus GN=Adk PE=1 SV=3	sp|Q64640|ADK_RAT	40 kDa	1	1.2
Unconventional myosin-Ib OS=Rattus norvegicus GN=Myo1b PE=2 SV=1	sp|Q05096|MYO1B_RAT	132 kDa	1	0.9
Adenylate kinase isoenzyme 4, mitochondrial OS=Rattus norvegicus GN=Ak4 PE=2 SV=1	sp|Q9WUS0|KAD4_RAT	25 kDa	1	1.1
Peroxiredoxin-5, mitochondrial OS=Rattus norvegicus GN=Prdx5 PE=1 SV=1	sp|Q9R063|PRDX5_RAT	22 kDa	1	1
Peroxiredoxin-6 OS=Rattus norvegicus GN=Prdx6 PE=1 SV=3	sp|O35244|PRDX6_RAT	25 kDa	1	1.2
Phosphoenolpyruvate carboxykinase, cytosolic [GTP] OS=Rattus norvegicus GN=Pck1 PE=1 SV=1	sp|P07379|PCKGC_RAT	69 kDa	1	1.1
Dipeptidyl peptidase 4 OS=Rattus norvegicus GN=Dpp4 PE=1 SV=2	sp|P14740|DPP4_RAT	88 kDa	1	0.9
Isocitrate dehydrogenase [NAD] subunit alpha, mitochondrial OS=Rattus norvegicus GN=Idh3a PE=1 SV=1	sp|Q99NA5|IDH3A_RAT	40 kDa	1	0.9
Dimethylaniline monooxygenase [N-oxide-forming] 1 OS=Rattus norvegicus GN=Fmo1 PE=1 SV=2	sp|P36365|FMO1_RAT	60 kDa	1	1.1
Aminoacylase-1A OS=Rattus norvegicus GN=Acy1a PE=1 SV=1	sp|Q6AYS7|ACY1A_RAT	46 kDa	1	1.2
DnaJ homolog subfamily C member 3 OS=Rattus norvegicus GN=Dnajc3 PE=2 SV=3	sp|Q9R0T3|DNJC3_RAT	58 kDa	1	1
Ketohexokinase OS=Rattus norvegicus GN=Khk PE=1 SV=1	sp|Q02974|KHK_RAT	33 kDa	1	1.1
Nucleolin OS=Rattus norvegicus GN=Ncl PE=1 SV=3	sp|P13383|NUCL_RAT	77 kDa	1	1.1
Cullin-associated NEDD8-dissociated protein 1 OS=Rattus norvegicus GN=Cand1 PE=1 SV=1	sp|P97536|CAND1_RAT	136 kDa	1	1.1
Carnitine O-palmitoyltransferase 1, liver isoform OS=Rattus norvegicus GN=Cpt1a PE=1 SV=2	sp|P32198|CPT1A_RAT	88 kDa	1	1
Transmembrane emp24 domain-containing protein 9 OS=Rattus norvegicus GN=Tmed9 PE=1 SV=1	sp|Q5I0E7|TMED9_RAT	27 kDa	1	1.1
26S protease regulatory subunit 6A OS=Rattus norvegicus GN=Psmc3 PE=2 SV=1	sp|Q63569|PRS6A_RAT	49 kDa	1	1.2
Protein disulfide-isomerase A5 OS=Rattus norvegicus GN=Pdia5 PE=2 SV=1	sp|Q5I0H9|PDIA5_RAT	59 kDa	1	1.5
Pyridine nucleotide-disulfide oxidoreductase domain-containing protein 2 OS=Rattus norvegicus GN=Pyroxd2 PE=2 SV=1	sp|Q68FT3|PYRD2_RAT	63 kDa	1	1.2
Cluster of SEC14-like protein 2 OS=Rattus norvegicus GN=Sec14l2 PE=1 SV=1 (sp|Q99MS0|S14L2_RAT)	sp|Q99MS0|S14L2_RAT	46 kDa	1	1.1
Farnesyl pyrophosphate synthase OS=Rattus norvegicus GN=Fdps PE=2 SV=2	sp|P05369|FPPS_RAT	41 kDa	1	1.2
Acyl-CoA-binding protein OS=Rattus norvegicus GN=Dbi PE=1 SV=3	sp|P11030|ACBP_RAT	10 kDa	1	1.1
Cluster of Alcohol dehydrogenase class-3 OS=Rattus norvegicus GN=Adh5 PE=1 SV=2 (sp|P12711|ADHX_RAT)	sp|P12711|ADHX_RAT	40 kDa	1	1.2
Mitochondrial import receptor subunit TOM70 OS=Rattus norvegicus GN=Tomm70a PE=1 SV=1	sp|Q75Q39|TOM70_RAT	67 kDa	1	1.1
Acyl-coenzyme A synthetase ACSM5, mitochondrial OS=Rattus norvegicus GN=Acsm5 PE=2 SV=1	sp|Q6AYT9|ACSM5_RAT	65 kDa	1	1.1
Coatomer subunit beta' OS=Rattus norvegicus GN=Copb2 PE=1 SV=3	sp|O35142|COPB2_RAT	103 kDa	1	1.1
Coatomer subunit beta OS=Rattus norvegicus GN=Copb1 PE=1 SV=1	sp|P23514|COPB_RAT	107 kDa	1	1
F-actin-capping protein subunit beta OS=Rattus norvegicus GN=Capzb PE=1 SV=1	sp|Q5XI32|CAPZB_RAT	31 kDa	1	0.9
Lon protease homolog 2, peroxisomal OS=Rattus norvegicus GN=Lonp2 PE=1 SV=2	sp|Q3MIB4|LONP2_RAT	94 kDa	1	0.8
Alpha-2-HS-glycoprotein OS=Rattus norvegicus GN=Ahsg PE=1 SV=2	sp|P24090|FETUA_RAT	38 kDa	1	1.1
Acyl-coenzyme A thioesterase 12 OS=Rattus norvegicus GN=Acot12 PE=1 SV=1	sp|Q99NB7|ACO12_RAT	62 kDa	1	1
Cluster of Sulfotransferase 1C1 OS=Rattus norvegicus GN=Sult1c1 PE=1 SV=1 (sp|P50237|ST1C1_RAT)	sp|P50237|ST1C1_RAT	36 kDa	1	1
Hydroxyacid oxidase 2 OS=Rattus norvegicus GN=Hao2 PE=1 SV=2	sp|Q07523|HAOX2_RAT	39 kDa	1	0.9
DNA damage-binding protein 1 OS=Rattus norvegicus GN=Ddb1 PE=2 SV=1	sp|Q9ESW0|DDB1_RAT	127 kDa	1	1
Alpha-tocopherol transfer protein OS=Rattus norvegicus GN=Ttpa PE=1 SV=1	sp|P41034|TTPA_RAT	32 kDa	1	0.9
Dipeptidyl peptidase 3 OS=Rattus norvegicus GN=Dpp3 PE=1 SV=2	sp|O55096|DPP3_RAT	83 kDa	1	0.9
Mitochondrial carnitine/acylcarnitine carrier protein OS=Rattus norvegicus GN=Slc25a20 PE=1 SV=1	sp|P97521|MCAT_RAT	33 kDa	1	1
Tropomyosin alpha-3 chain OS=Rattus norvegicus GN=Tpm3 PE=1 SV=2	sp|Q63610|TPM3_RAT	29 kDa	1	1
Putative L-aspartate dehydrogenase OS=Rattus norvegicus GN=Aspdh PE=2 SV=1	sp|Q5I0J9|ASPD_RAT	31 kDa	1	1.1
Heterogeneous nuclear ribonucleoproteins A2/B1 OS=Rattus norvegicus GN=Hnrnpa2b1 PE=1 SV=1	sp|A7VJC2|ROA2_RAT	37 kDa	1	1.2
Serine protease inhibitor A3N OS=Rattus norvegicus GN=Serpina3n PE=1 SV=3	sp|P09006|SPA3N_RAT	47 kDa	1	0.9
Glutamate--cysteine ligase catalytic subunit OS=Rattus norvegicus GN=Gclc PE=1 SV=2	sp|P19468|GSH1_RAT	73 kDa	1	1
Myosin light polypeptide 6 OS=Rattus norvegicus GN=Myl6 PE=1 SV=3	sp|Q64119|MYL6_RAT	17 kDa	1	0.8
60S ribosomal protein L6 OS=Rattus norvegicus GN=Rpl6 PE=1 SV=5	sp|P21533|RL6_RAT	34 kDa	1	1.7
Arsenite methyltransferase OS=Rattus norvegicus GN=As3mt PE=1 SV=1	sp|Q8VHT6|AS3MT_RAT	41 kDa	1	1.1
40S ribosomal protein S10 OS=Rattus norvegicus GN=Rps10 PE=2 SV=1	sp|P63326|RS10_RAT	19 kDa	1	1
Cluster of 6-phosphofructo-2-kinase/fructose-2,6-bisphosphatase 1 OS=Rattus norvegicus GN=Pfkfb1 PE=1 SV=3 (sp|P07953|F261_RAT)	sp|P07953|F261_RAT [3]	55 kDa	1	0.9
NADH dehydrogenase [ubiquinone] 1 alpha subcomplex subunit 5 OS=Rattus norvegicus GN=Ndufa5 PE=1 SV=3	sp|Q63362|NDUA5_RAT	13 kDa	1	0.8
Redox-regulatory protein FAM213A OS=Rattus norvegicus GN=Fam213a PE=1 SV=1	sp|Q6AXX6|F213A_RAT	26 kDa	1	0.7
Gelsolin OS=Rattus norvegicus GN=Gsn PE=1 SV=1	sp|Q68FP1|GELS_RAT	86 kDa	1	1.1
Citrate lyase subunit beta-like protein, mitochondrial OS=Rattus norvegicus GN=Clybl PE=2 SV=2	sp|Q5I0K3|CLYBL_RAT	37 kDa	1	0.9
Malectin OS=Rattus norvegicus GN=Mlec PE=2 SV=1	sp|Q5FVQ4|MLEC_RAT	32 kDa	1	0.8
EH domain-containing protein 3 OS=Rattus norvegicus GN=Ehd3 PE=1 SV=2	sp|Q8R491|EHD3_RAT	61 kDa	1	1.1
Ester hydrolase C11orf54 homolog OS=Rattus norvegicus PE=1 SV=1	sp|Q5U2Q3|CK054_RAT	35 kDa	1	1
Prostaglandin E synthase 3 OS=Rattus norvegicus GN=Ptges3 PE=1 SV=2	sp|P83868|TEBP_RAT	19 kDa	1	1
Estradiol 17-beta-dehydrogenase 12 OS=Rattus norvegicus GN=Hsd17b12 PE=2 SV=1	sp|Q6P7R8|DHB12_RAT	35 kDa	1	1
tRNA-splicing ligase RtcB homolog OS=Rattus norvegicus PE=2 SV=1	sp|Q6AYT3|RTCB_RAT	55 kDa	1	1
Junction plakoglobin OS=Rattus norvegicus GN=Jup PE=1 SV=1	sp|Q6P0K8|PLAK_RAT	82 kDa	1	0.9
Serum paraoxonase/arylesterase 2 OS=Rattus norvegicus GN=Pon2 PE=2 SV=1	sp|Q6AXM8|PON2_RAT	40 kDa	1	0.8
Annexin A5 OS=Rattus norvegicus GN=Anxa5 PE=1 SV=3	sp|P14668|ANXA5_RAT	36 kDa	1	1.3
Geranylgeranyl transferase type-2 subunit alpha OS=Rattus norvegicus GN=Rabggta PE=1 SV=1	sp|Q08602|PGTA_RAT	65 kDa	1	1.1
Galectin-9 OS=Rattus norvegicus GN=Lgals9 PE=2 SV=2	sp|P97840|LEG9_RAT	40 kDa	1	0.8
Cluster of Guanine nucleotide-binding protein G(k) subunit alpha OS=Rattus norvegicus GN=Gnai3 PE=1 SV=3 (sp|P08753|GNAI3_RAT)	sp|P08753|GNAI3_RAT [3]	41 kDa	1	0.9
WD repeat-containing protein 1 OS=Rattus norvegicus GN=Wdr1 PE=1 SV=3	sp|Q5RKI0|WDR1_RAT	66 kDa	1	0.9
Dynactin subunit 2 OS=Rattus norvegicus GN=Dctn2 PE=1 SV=1	sp|Q6AYH5|DCTN2_RAT	44 kDa	1	0.9
Cadherin-17 OS=Rattus norvegicus GN=Cdh17 PE=2 SV=1	sp|P55281|CAD17_RAT	92 kDa	1	0.8
Tryptophan--tRNA ligase, cytoplasmic OS=Rattus norvegicus GN=Wars PE=1 SV=2	sp|Q6P7B0|SYWC_RAT	54 kDa	1	1
Acyl-coenzyme A synthetase ACSM2, mitochondrial OS=Rattus norvegicus GN=Acsm2 PE=2 SV=2	sp|O70490|ACSM2_RAT	64 kDa	1	1.1
Myosin-10 OS=Rattus norvegicus GN=Myh10 PE=1 SV=1	sp|Q9JLT0|MYH10_RAT	229 kDa	1	0.9
Prothrombin OS=Rattus norvegicus GN=F2 PE=1 SV=1	sp|P18292|THRB_RAT	70 kDa	1	1.1
Serum albumin OS=Rattus norvegicus GN=Alb PE=1 SV=2	sp|P02770|ALBU_RAT	69 kDa	1	1.2
Myosin-9 OS=Rattus norvegicus GN=Myh9 PE=1 SV=3	sp|Q62812|MYH9_RAT	226 kDa	1	0.8
Ornithine carbamoyltransferase, mitochondrial OS=Rattus norvegicus GN=Otc PE=1 SV=1	sp|P00481|OTC_RAT	40 kDa	1	1.1
Uricase OS=Rattus norvegicus GN=Uox PE=1 SV=3	sp|P09118|URIC_RAT	35 kDa	1	1
78 kDa glucose-regulated protein OS=Rattus norvegicus GN=Hspa5 PE=1 SV=1	sp|P06761|GRP78_RAT	72 kDa	1	0.8
Succinate dehydrogenase [ubiquinone] flavoprotein subunit, mitochondrial OS=Rattus norvegicus GN=Sdha PE=1 SV=1	sp|Q920L2|DHSA_RAT	72 kDa	1	0.8
Argininosuccinate synthase OS=Rattus norvegicus GN=Ass1 PE=2 SV=1	sp|P09034|ASSY_RAT	46 kDa	1	1.1
Hemoglobin subunit alpha-1/2 OS=Rattus norvegicus GN=Hba1 PE=1 SV=3	sp|P01946|HBA_RAT	15 kDa	1	1.5
Protein disulfide-isomerase OS=Rattus norvegicus GN=P4hb PE=1 SV=2	sp|P04785|PDIA1_RAT	57 kDa	1	1.1
Cluster of Keratin, type II cytoskeletal 8 OS=Rattus norvegicus GN=Krt8 PE=1 SV=3 (sp|Q10758|K2C8_RAT)	sp|Q10758|K2C8_RAT [4]	54 kDa	1	1.1
Plectin OS=Rattus norvegicus GN=Plec PE=1 SV=2	sp|P30427|PLEC_RAT	534 kDa	1	1.2
Cytosolic 10-formyltetrahydrofolate dehydrogenase OS=Rattus norvegicus GN=Aldh1l1 PE=1 SV=3	sp|P28037|AL1L1_RAT	99 kDa	1	1.1
Spectrin alpha chain, non-erythrocytic 1 OS=Rattus norvegicus GN=Sptan1 PE=1 SV=2	sp|P16086|SPTN1_RAT	285 kDa	1	1.1
Malate dehydrogenase, mitochondrial OS=Rattus norvegicus GN=Mdh2 PE=1 SV=2	sp|P04636|MDHM_RAT	36 kDa	1	1.2
Carbonic anhydrase 3 OS=Rattus norvegicus GN=Ca3 PE=1 SV=3	sp|P14141|CAH3_RAT	29 kDa	1	1.2
Alpha-aminoadipic semialdehyde dehydrogenase OS=Rattus norvegicus GN=Aldh7a1 PE=1 SV=2	sp|Q64057|AL7A1_RAT	59 kDa	1	1.2
Sarcosine dehydrogenase, mitochondrial OS=Rattus norvegicus GN=Sardh PE=1 SV=2	sp|Q64380|SARDH_RAT	101 kDa	1	1.2
Protein disulfide-isomerase A3 OS=Rattus norvegicus GN=Pdia3 PE=1 SV=2	sp|P11598|PDIA3_RAT	57 kDa	1	0.9
Arginase-1 OS=Rattus norvegicus GN=Arg1 PE=1 SV=2	sp|P07824|ARGI1_RAT	35 kDa	1	1.1
Complement C3 OS=Rattus norvegicus GN=C3 PE=1 SV=3	sp|P01026|CO3_RAT	186 kDa	1	1
Electron transfer flavoprotein subunit alpha, mitochondrial OS=Rattus norvegicus GN=Etfa PE=1 SV=4	sp|P13803|ETFA_RAT	35 kDa	1	1.1
Alpha-actinin-4 OS=Rattus norvegicus GN=Actn4 PE=1 SV=2	sp|Q9QXQ0|ACTN4_RAT	105 kDa	1	0.9
Very long-chain acyl-CoA synthetase OS=Rattus norvegicus GN=Slc27a2 PE=1 SV=1	sp|P97524|S27A2_RAT	71 kDa	1	0.8
Cystathionine gamma-lyase OS=Rattus norvegicus GN=Cth PE=1 SV=2	sp|P18757|CGL_RAT	44 kDa	1	1.1
Phosphoglycerate kinase 1 OS=Rattus norvegicus GN=Pgk1 PE=1 SV=2	sp|P16617|PGK1_RAT	45 kDa	1	1.2
ATP-citrate synthase OS=Rattus norvegicus GN=Acly PE=1 SV=1	sp|P16638|ACLY_RAT	121 kDa	1	1
Cytochrome P450 2C11 OS=Rattus norvegicus GN=Cyp2c11 PE=1 SV=1	sp|P08683|CP2CB_RAT	57 kDa	1	0.8
Protein disulfide-isomerase A4 OS=Rattus norvegicus GN=Pdia4 PE=1 SV=2	sp|P38659|PDIA4_RAT	73 kDa	1	0.8
Cluster of Fructose-1,6-bisphosphatase 1 OS=Rattus norvegicus GN=Fbp1 PE=1 SV=2 (sp|P19112|F16P1_RAT)	sp|P19112|F16P1_RAT [2]	40 kDa	1	1.1
Heat shock protein HSP 90-beta OS=Rattus norvegicus GN=Hsp90ab1 PE=1 SV=4	sp|P34058|HS90B_RAT	83 kDa	1	1
Isocitrate dehydrogenase [NADP] cytoplasmic OS=Rattus norvegicus GN=Idh1 PE=1 SV=1	sp|P41562|IDHC_RAT	47 kDa	1	1
Probable 2-oxoglutarate dehydrogenase E1 component DHKTD1, mitochondrial OS=Rattus norvegicus GN=Dhtkd1 PE=2 SV=1	sp|Q4KLP0|DHTK1_RAT	103 kDa	1	1.1
Propionyl-CoA carboxylase alpha chain, mitochondrial OS=Rattus norvegicus GN=Pcca PE=1 SV=3	sp|P14882|PCCA_RAT	82 kDa	1	1
Cluster of Cytochrome P450 2A1 OS=Rattus norvegicus GN=Cyp2a1 PE=1 SV=2 (sp|P11711|CP2A1_RAT)	sp|P11711|CP2A1_RAT [2]	56 kDa	1	1.2
Sulfite oxidase, mitochondrial OS=Rattus norvegicus GN=Suox PE=1 SV=2	sp|Q07116|SUOX_RAT	61 kDa	1	0.9
Vinculin OS=Rattus norvegicus GN=Vcl PE=1 SV=1	sp|P85972|VINC_RAT	117 kDa	1	1.1
Amine oxidase [flavin-containing] B OS=Rattus norvegicus GN=Maob PE=1 SV=3	sp|P19643|AOFB_RAT	58 kDa	1	1
Prohibitin-2 OS=Rattus norvegicus GN=Phb2 PE=1 SV=1	sp|Q5XIH7|PHB2_RAT	33 kDa	1	1
Peroxisomal acyl-coenzyme A oxidase 2 OS=Rattus norvegicus GN=Acox2 PE=1 SV=1	sp|P97562|ACOX2_RAT	77 kDa	1	1
Cytosol aminopeptidase OS=Rattus norvegicus GN=Lap3 PE=1 SV=1	sp|Q68FS4|AMPL_RAT	56 kDa	1	1.2
Phytanoyl-CoA dioxygenase, peroxisomal OS=Rattus norvegicus GN=Phyh PE=1 SV=2	sp|P57093|PAHX_RAT	39 kDa	1	1.1
Calnexin OS=Rattus norvegicus GN=Canx PE=1 SV=1	sp|P35565|CALX_RAT	67 kDa	1	0.8
ATP synthase subunit O, mitochondrial OS=Rattus norvegicus GN=Atp5o PE=1 SV=1	sp|Q06647|ATPO_RAT	23 kDa	1	1
Cluster of Sarcoplasmic/endoplasmic reticulum calcium ATPase 2 OS=Rattus norvegicus GN=Atp2a2 PE=1 SV=1 (sp|P11507|AT2A2_RAT)	sp|P11507|AT2A2_RAT [3]	115 kDa	1	0.9
Cytoplasmic dynein 1 heavy chain 1 OS=Rattus norvegicus GN=Dync1h1 PE=1 SV=1	sp|P38650|DYHC1_RAT	532 kDa	1	1
Hypoxia up-regulated protein 1 OS=Rattus norvegicus GN=Hyou1 PE=1 SV=1	sp|Q63617|HYOU1_RAT	111 kDa	1	0.9
T-complex protein 1 subunit alpha OS=Rattus norvegicus GN=Tcp1 PE=1 SV=1	sp|P28480|TCPA_RAT	60 kDa	1	0.9
Cysteine sulfinic acid decarboxylase OS=Rattus norvegicus GN=Csad PE=1 SV=1	sp|Q64611|CSAD_RAT	55 kDa	1	0.9
Xanthine dehydrogenase/oxidase OS=Rattus norvegicus GN=Xdh PE=1 SV=3	sp|P22985|XDH_RAT	146 kDa	1	1
Methylcrotonoyl-CoA carboxylase subunit alpha, mitochondrial OS=Rattus norvegicus GN=Mccc1 PE=1 SV=1	sp|Q5I0C3|MCCA_RAT	79 kDa	1	1
Histone H4 OS=Rattus norvegicus GN=Hist1h4b PE=1 SV=2	sp|P62804|H4_RAT	11 kDa	1	1.3
Peroxisomal trans-2-enoyl-CoA reductase OS=Rattus norvegicus GN=Pecr PE=2 SV=1	sp|Q9WVK3|PECR_RAT	32 kDa	1	1
NAD kinase domain-containing protein 1 OS=Rattus norvegicus GN=Nadkd1 PE=2 SV=1	sp|Q1HCL7|NAKD1_RAT	48 kDa	1	1.1
Acyl-CoA synthetase family member 2, mitochondrial OS=Rattus norvegicus GN=Acsf2 PE=2 SV=1	sp|Q499N5|ACSF2_RAT	68 kDa	1	1.2
Aldehyde oxidase OS=Rattus norvegicus GN=Aox1 PE=2 SV=1	sp|Q9Z0U5|ADO_RAT	147 kDa	1	0.9
Dimethylaniline monooxygenase [N-oxide-forming] 3 OS=Rattus norvegicus GN=Fmo3 PE=1 SV=1	sp|Q9EQ76|FMO3_RAT	60 kDa	1	0.8
Cytochrome b-c1 complex subunit Rieske, mitochondrial OS=Rattus norvegicus GN=Uqcrfs1 PE=1 SV=2	sp|P20788|UCRI_RAT	29 kDa	1	0.9
Lon protease homolog, mitochondrial OS=Rattus norvegicus GN=Lonp1 PE=2 SV=1	sp|Q924S5|LONM_RAT	106 kDa	1	1
Cluster of Tropomyosin alpha-1 chain OS=Rattus norvegicus GN=Tpm1 PE=1 SV=3 (sp|P04692|TPM1_RAT)	sp|P04692|TPM1_RAT [3]	33 kDa	1	1.1
Methylcrotonoyl-CoA carboxylase beta chain, mitochondrial OS=Rattus norvegicus GN=Mccc2 PE=2 SV=1	sp|Q5XIT9|MCCB_RAT	62 kDa	1	0.9
ATP synthase subunit b, mitochondrial OS=Rattus norvegicus GN=Atp5f1 PE=1 SV=1	sp|P19511|AT5F1_RAT	29 kDa	1	1
40S ribosomal protein S3a OS=Rattus norvegicus GN=Rps3a PE=1 SV=2	sp|P49242|RS3A_RAT	30 kDa	1	1.3
10 kDa heat shock protein, mitochondrial OS=Rattus norvegicus GN=Hspe1 PE=1 SV=3	sp|P26772|CH10_RAT	11 kDa	1	1.1
Pyruvate dehydrogenase E1 component subunit alpha, somatic form, mitochondrial OS=Rattus norvegicus GN=Pdha1 PE=1 SV=2	sp|P26284|ODPA_RAT	43 kDa	1	0.9
Alcohol dehydrogenase [NADP(+)] OS=Rattus norvegicus GN=Akr1a1 PE=1 SV=2	sp|P51635|AK1A1_RAT	37 kDa	1	1.1
Purine nucleoside phosphorylase OS=Rattus norvegicus GN=Pnp PE=1 SV=1	sp|P85973|PNPH_RAT	32 kDa	1	1.1
Serum paraoxonase/arylesterase 1 OS=Rattus norvegicus GN=Pon1 PE=1 SV=3	sp|P55159|PON1_RAT	39 kDa	1	1
Protein ERGIC-53 OS=Rattus norvegicus GN=Lman1 PE=1 SV=1	sp|Q62902|LMAN1_RAT	58 kDa	1	1.1
Ornithine aminotransferase, mitochondrial OS=Rattus norvegicus GN=Oat PE=1 SV=1	sp|P04182|OAT_RAT	48 kDa	1	0.9
Cluster of Moesin OS=Rattus norvegicus GN=Msn PE=1 SV=3 (sp|O35763|MOES_RAT)	sp|O35763|MOES_RAT [2]	68 kDa	1	1.2
Sulfotransferase family cytosolic 1B member 1 OS=Rattus norvegicus GN=Sult1b1 PE=1 SV=2	sp|P52847|ST1B1_RAT	35 kDa	1	1.2
Complement component 1 Q subcomponent-binding protein, mitochondrial OS=Rattus norvegicus GN=C1qbp PE=1 SV=2	sp|O35796|C1QBP_RAT	31 kDa	1	0.9
60S acidic ribosomal protein P2 OS=Rattus norvegicus GN=Rplp2 PE=1 SV=2	sp|P02401|RLA2_RAT	12 kDa	1	1
Polymeric immunoglobulin receptor OS=Rattus norvegicus GN=Pigr PE=1 SV=1	sp|P15083|PIGR_RAT	85 kDa	1	1
60S ribosomal protein L23a OS=Rattus norvegicus GN=Rpl23a PE=2 SV=1	sp|P62752|RL23A_RAT	18 kDa	1	1.2
3-hydroxyanthranilate 3,4-dioxygenase OS=Rattus norvegicus GN=Haao PE=1 SV=2	sp|P46953|3HAO_RAT	33 kDa	1	0.9
S-methylmethionine--homocysteine S-methyltransferase BHMT2 OS=Rattus norvegicus GN=Bhmt2 PE=2 SV=1	sp|Q68FT5|BHMT2_RAT	40 kDa	1	1
Neurolysin, mitochondrial OS=Rattus norvegicus GN=Nln PE=1 SV=1	sp|P42676|NEUL_RAT	80 kDa	1	1.2
Leucine-rich repeat-containing protein 59 OS=Rattus norvegicus GN=Lrrc59 PE=1 SV=1	sp|Q5RJR8|LRC59_RAT	35 kDa	1	1
DnaJ homolog subfamily A member 1 OS=Rattus norvegicus GN=Dnaja1 PE=2 SV=1	sp|P63036|DNJA1_RAT	45 kDa	1	1.2
26S protease regulatory subunit 7 OS=Rattus norvegicus GN=Psmc2 PE=1 SV=3	sp|Q63347|PRS7_RAT	49 kDa	1	1.2
Complement C4 OS=Rattus norvegicus GN=C4 PE=1 SV=3	sp|P08649|CO4_RAT	192 kDa	1	0.8
Cluster of Phosphoglycerate mutase 1 OS=Rattus norvegicus GN=Pgam1 PE=1 SV=4 (sp|P25113|PGAM1_RAT)	sp|P25113|PGAM1_RAT [2]	29 kDa	1	0.9
26S proteasome non-ATPase regulatory subunit 1 OS=Rattus norvegicus GN=Psmd1 PE=2 SV=1	sp|O88761|PSMD1_RAT	106 kDa	1	1.3
Eukaryotic translation initiation factor 2 subunit 1 OS=Rattus norvegicus GN=Eif2s1 PE=1 SV=2	sp|P68101|IF2A_RAT	36 kDa	1	1.1
Alanine aminotransferase 1 OS=Rattus norvegicus GN=Gpt PE=1 SV=2	sp|P25409|ALAT1_RAT	55 kDa	1	1.2
Mitochondrial import inner membrane translocase subunit TIM44 OS=Rattus norvegicus GN=Timm44 PE=2 SV=1	sp|O35094|TIM44_RAT	51 kDa	1	1
Protein transport protein Sec61 subunit alpha isoform 1 OS=Rattus norvegicus GN=Sec61a1 PE=2 SV=2	sp|P61621|S61A1_RAT	52 kDa	1	0.9
Destrin OS=Rattus norvegicus GN=Dstn PE=1 SV=3	sp|Q7M0E3|DEST_RAT	19 kDa	1	1.1
Threonine--tRNA ligase, cytoplasmic OS=Rattus norvegicus GN=Tars PE=2 SV=1	sp|Q5XHY5|SYTC_RAT	81 kDa	1	1.2
Major vault protein OS=Rattus norvegicus GN=Mvp PE=1 SV=4	sp|Q62667|MVP_RAT	96 kDa	1	1.2
60S ribosomal protein L23 OS=Rattus norvegicus GN=Rpl23 PE=2 SV=1	sp|P62832|RL23_RAT	15 kDa	1	1.5
Cofilin-1 OS=Rattus norvegicus GN=Cfl1 PE=1 SV=3	sp|P45592|COF1_RAT	19 kDa	1	0.9
60S ribosomal protein L9 OS=Rattus norvegicus GN=Rpl9 PE=1 SV=1	sp|P17077|RL9_RAT	22 kDa	1	1
60S ribosomal protein L27a OS=Rattus norvegicus GN=Rpl27a PE=1 SV=3	sp|P18445|RL27A_RAT	17 kDa	1	1.6
26S proteasome non-ATPase regulatory subunit 13 OS=Rattus norvegicus GN=Psmd13 PE=1 SV=1	sp|B0BN93|PSD13_RAT	43 kDa	1	1.1
UDP-glucuronosyltransferase 2B2 OS=Rattus norvegicus GN=Ugt2b PE=1 SV=1	sp|P08541|UD2B2_RAT	61 kDa	1	1.2
Proteasome subunit alpha type-1 OS=Rattus norvegicus GN=Psma1 PE=1 SV=2	sp|P18420|PSA1_RAT	30 kDa	1	1
Aminopeptidase N OS=Rattus norvegicus GN=Anpep PE=1 SV=2	sp|P15684|AMPN_RAT	109 kDa	1	1
Cathepsin D OS=Rattus norvegicus GN=Ctsd PE=1 SV=1	sp|P24268|CATD_RAT	45 kDa	1	1
Proteasome subunit alpha type-4 OS=Rattus norvegicus GN=Psma4 PE=1 SV=1	sp|P21670|PSA4_RAT	29 kDa	1	1.2
17-beta-hydroxysteroid dehydrogenase 13 OS=Rattus norvegicus GN=Hsd17b13 PE=2 SV=1	sp|Q5M875|DHB13_RAT	33 kDa	1	0.9
Mesencephalic astrocyte-derived neurotrophic factor OS=Rattus norvegicus GN=Manf PE=1 SV=1	sp|P0C5H9|MANF_RAT	20 kDa	1	0.8
Dipeptidyl peptidase 1 OS=Rattus norvegicus GN=Ctsc PE=1 SV=3	sp|P80067|CATC_RAT	52 kDa	1	1.1
NADPH:adrenodoxin oxidoreductase, mitochondrial OS=Rattus norvegicus GN=Fdxr PE=1 SV=1	sp|P56522|ADRO_RAT	54 kDa	1	1.2
Glutathione S-transferase omega-1 OS=Rattus norvegicus GN=Gsto1 PE=1 SV=2	sp|Q9Z339|GSTO1_RAT	28 kDa	1	0.8
Translationally-controlled tumor protein OS=Rattus norvegicus GN=Tpt1 PE=1 SV=1	sp|P63029|TCTP_RAT	19 kDa	1	0.9
Xylulose kinase OS=Rattus norvegicus GN=Xylb PE=2 SV=1	sp|Q3MIF4|XYLB_RAT	58 kDa	1	1
S-formylglutathione hydrolase OS=Rattus norvegicus GN=Esd PE=1 SV=1	sp|B0BNE5|ESTD_RAT	31 kDa	1	1.1
Erlin-2 OS=Rattus norvegicus GN=Erlin2 PE=1 SV=1	sp|B5DEH2|ERLN2_RAT	38 kDa	1	0.9
Nucleophosmin OS=Rattus norvegicus GN=Npm1 PE=1 SV=1	sp|P13084|NPM_RAT	33 kDa	1	1.2
NLR family member X1 OS=Rattus norvegicus GN=Nlrx1 PE=2 SV=1	sp|Q5FVQ8|NLRX1_RAT	108 kDa	1	0.9
Kynureninase OS=Rattus norvegicus GN=Kynu PE=1 SV=2	sp|P70712|KYNU_RAT	52 kDa	1	1.2
26S protease regulatory subunit 6B OS=Rattus norvegicus GN=Psmc4 PE=1 SV=1	sp|Q63570|PRS6B_RAT	47 kDa	1	1
Transcription intermediary factor 1-beta OS=Rattus norvegicus GN=Trim28 PE=1 SV=2	sp|O08629|TIF1B_RAT	89 kDa	1	0.9
60S ribosomal protein L18a OS=Rattus norvegicus GN=Rpl18a PE=2 SV=1	sp|P62718|RL18A_RAT	21 kDa	1	1
Adrenodoxin, mitochondrial OS=Rattus norvegicus GN=Fdx1 PE=2 SV=1	sp|P24483|ADX_RAT	20 kDa	1	1.1
Saccharopine dehydrogenase-like oxidoreductase OS=Rattus norvegicus GN=Sccpdh PE=2 SV=1	sp|Q6AY30|SCPDL_RAT	47 kDa	1	0.9
Nicotinate-nucleotide pyrophosphorylase [carboxylating] OS=Rattus norvegicus GN=Qprt PE=2 SV=1	sp|Q5I0M2|NADC_RAT	31 kDa	1	1.1
Catenin beta-1 OS=Rattus norvegicus GN=Ctnnb1 PE=1 SV=1	sp|Q9WU82|CTNB1_RAT	85 kDa	1	1
Nucleoside diphosphate-linked moiety X motif 19, mitochondrial OS=Rattus norvegicus GN=Nudt19 PE=2 SV=1	sp|Q6AYD9|NUD19_RAT	40 kDa	1	1.1
Intercellular adhesion molecule 1 OS=Rattus norvegicus GN=Icam1 PE=2 SV=1	sp|Q00238|ICAM1_RAT	60 kDa	1	1.1
Beta-glucuronidase OS=Rattus norvegicus GN=Gusb PE=2 SV=1	sp|P06760|BGLR_RAT	75 kDa	1	0.9
Kynurenine--oxoglutarate transaminase 1, mitochondrial OS=Rattus norvegicus GN=Ccbl1 PE=1 SV=1	sp|Q08415|KAT1_RAT	52 kDa	1	1
ATP synthase subunit delta, mitochondrial OS=Rattus norvegicus GN=Atp5d PE=1 SV=2	sp|P35434|ATPD_RAT	18 kDa	1	1.1
[Pyruvate dehydrogenase [lipoamide]] kinase isozyme 2, mitochondrial OS=Rattus norvegicus GN=Pdk2 PE=1 SV=1	sp|Q64536|PDK2_RAT	46 kDa	1	1
ER membrane protein complex subunit 8 OS=Rattus norvegicus GN=Emc8 PE=2 SV=1	sp|Q5FVL2|EMC8_RAT	23 kDa	1	0.8
Translocon-associated protein subunit delta OS=Rattus norvegicus GN=Ssr4 PE=2 SV=1	sp|Q07984|SSRD_RAT	19 kDa	1	0.9
Protein kinase C and casein kinase substrate in neurons 2 protein OS=Rattus norvegicus GN=Pacsin2 PE=1 SV=2	sp|Q9QY17|PACN2_RAT	56 kDa	1	0.9
Transmembrane emp24 domain-containing protein 7 OS=Rattus norvegicus GN=Tmed7 PE=1 SV=1	sp|D3ZTX0|TMED7_RAT	25 kDa	1	1
Trimethyllysine dioxygenase, mitochondrial OS=Rattus norvegicus GN=Tmlhe PE=1 SV=2	sp|Q91ZW6|TMLH_RAT	50 kDa	1	1.1
CDGSH iron-sulfur domain-containing protein 1 OS=Rattus norvegicus GN=Cisd1 PE=3 SV=1	sp|B0K020|CISD1_RAT	12 kDa	1	1.1
Twinfilin-1 OS=Rattus norvegicus GN=Twf1 PE=2 SV=1	sp|Q5RJR2|TWF1_RAT	40 kDa	1	1.1
Solute carrier organic anion transporter family member 1B2 OS=Rattus norvegicus GN=Slco1b2 PE=1 SV=2	sp|Q9QZX8|SO1B2_RAT	77 kDa	1	1.4
Ubiquilin-1 OS=Rattus norvegicus GN=Ubqln1 PE=1 SV=1	sp|Q9JJP9|UBQL1_RAT	62 kDa	1	1.4
Phenylalanine--tRNA ligase alpha subunit OS=Rattus norvegicus GN=Farsa PE=1 SV=1	sp|Q505J8|SYFA_RAT	58 kDa	1	1.1
40S ribosomal protein S20 OS=Rattus norvegicus GN=Rps20 PE=3 SV=1	sp|P60868|RS20_RAT	13 kDa	1	1.3
V-type proton ATPase subunit C 1 OS=Rattus norvegicus GN=Atp6v1c1 PE=2 SV=1	sp|Q5FVI6|VATC1_RAT	44 kDa	1	1.3
Transmembrane emp24 domain-containing protein 2 OS=Rattus norvegicus GN=Tmed2 PE=1 SV=1	sp|Q63524|TMED2_RAT	23 kDa	1	0.9
Peroxisome assembly factor 2 OS=Rattus norvegicus GN=Pex6 PE=1 SV=1	sp|P54777|PEX6_RAT	104 kDa	1	0.7
Mitogen-activated protein kinase 1 OS=Rattus norvegicus GN=Mapk1 PE=1 SV=3	sp|P63086|MK01_RAT	41 kDa	1	0.9
Nuclear pore glycoprotein p62 OS=Rattus norvegicus GN=Nup62 PE=1 SV=1	sp|P17955|NUP62_RAT	53 kDa	1	1
Serine--pyruvate aminotransferase, mitochondrial OS=Rattus norvegicus GN=Agxt PE=1 SV=1	sp|P09139|SPYA_RAT	46 kDa	1	1.1
ATP-dependent Clp protease ATP-binding subunit clpX-like, mitochondrial OS=Rattus norvegicus GN=Clpx PE=2 SV=1	sp|Q5U2U0|CLPX_RAT	69 kDa	1	0.9
Eukaryotic translation initiation factor 4H OS=Rattus norvegicus GN=Eif4h PE=1 SV=1	sp|Q5XI72|IF4H_RAT	27 kDa	1	0.9
Reticulon-4 OS=Rattus norvegicus GN=Rtn4 PE=1 SV=1	sp|Q9JK11|RTN4_RAT	126 kDa	1	1
Citrate synthase, mitochondrial OS=Rattus norvegicus GN=Cs PE=1 SV=1	sp|Q8VHF5|CISY_RAT	52 kDa	1	1.1
Alanine--glyoxylate aminotransferase 2, mitochondrial OS=Rattus norvegicus GN=Agxt2 PE=1 SV=2	sp|Q64565|AGT2_RAT	57 kDa	1	1.2
Vesicle-fusing ATPase OS=Rattus norvegicus GN=Nsf PE=1 SV=1	sp|Q9QUL6|NSF_RAT	83 kDa	1	0.9
Proteasome subunit alpha type-6 OS=Rattus norvegicus GN=Psma6 PE=1 SV=1	sp|P60901|PSA6_RAT	27 kDa	1	0.9
Nuclear pore complex protein Nup98-Nup96 OS=Rattus norvegicus GN=Nup98 PE=1 SV=2	sp|P49793|NUP98_RAT	197 kDa	1	1
Canalicular multispecific organic anion transporter 1 OS=Rattus norvegicus GN=Abcc2 PE=2 SV=1	sp|Q63120|MRP2_RAT	173 kDa	1	0.9
Nicastrin OS=Rattus norvegicus GN=Ncstn PE=1 SV=1	sp|Q8CGU6|NICA_RAT	78 kDa	1	1.3
Catalase OS=Rattus norvegicus GN=Cat PE=1 SV=3	sp|P04762|CATA_RAT	60 kDa	1	1.1
Pyruvate carboxylase, mitochondrial OS=Rattus norvegicus GN=Pc PE=1 SV=2	sp|P52873|PYC_RAT	130 kDa	1	1.2
Methylmalonate-semialdehyde dehydrogenase [acylating], mitochondrial OS=Rattus norvegicus GN=Aldh6a1 PE=1 SV=1	sp|Q02253|MMSA_RAT	58 kDa	1	1.1
Hydroxymethylglutaryl-CoA synthase, mitochondrial OS=Rattus norvegicus GN=Hmgcs2 PE=2 SV=1	sp|P22791|HMCS2_RAT	57 kDa	1	0.9
Long-chain-fatty-acid--CoA ligase 1 OS=Rattus norvegicus GN=Acsl1 PE=1 SV=1	sp|P18163|ACSL1_RAT	78 kDa	1	0.8
Cluster of Hemoglobin subunit beta-1 OS=Rattus norvegicus GN=Hbb PE=1 SV=3 (sp|P02091|HBB1_RAT)	sp|P02091|HBB1_RAT [2]	16 kDa	1	1.6
3-hydroxyacyl-CoA dehydrogenase type-2 OS=Rattus norvegicus GN=Hsd17b10 PE=1 SV=3	sp|O70351|HCD2_RAT	27 kDa	1	1.1
Acetyl-CoA acetyltransferase, mitochondrial OS=Rattus norvegicus GN=Acat1 PE=1 SV=1	sp|P17764|THIL_RAT	45 kDa	1	1
Electron transfer flavoprotein-ubiquinone oxidoreductase, mitochondrial OS=Rattus norvegicus GN=Etfdh PE=2 SV=1	sp|Q6UPE1|ETFD_RAT	68 kDa	1	0.8
Clathrin heavy chain 1 OS=Rattus norvegicus GN=Cltc PE=1 SV=3	sp|P11442|CLH_RAT	192 kDa	1	1.2
Dolichyl-diphosphooligosaccharide--protein glycosyltransferase subunit 1 OS=Rattus norvegicus GN=Rpn1 PE=2 SV=1	sp|P07153|RPN1_RAT	68 kDa	1	1
C-1-tetrahydrofolate synthase, cytoplasmic OS=Rattus norvegicus GN=Mthfd1 PE=1 SV=3	sp|P27653|C1TC_RAT	101 kDa	1	1.1
NADH-ubiquinone oxidoreductase 75 kDa subunit, mitochondrial OS=Rattus norvegicus GN=Ndufs1 PE=1 SV=1	sp|Q66HF1|NDUS1_RAT	79 kDa	1	0.8
Selenium-binding protein 1 OS=Rattus norvegicus GN=Selenbp1 PE=1 SV=1	sp|Q8VIF7|SBP1_RAT	53 kDa	1	1
3-alpha-hydroxysteroid dehydrogenase OS=Rattus norvegicus GN=Akr1c9 PE=1 SV=1	sp|P23457|DIDH_RAT	37 kDa	1	1.1
ATP synthase subunit gamma, mitochondrial OS=Rattus norvegicus GN=Atp5c1 PE=1 SV=2	sp|P35435|ATPG_RAT	30 kDa	1	1
Medium-chain specific acyl-CoA dehydrogenase, mitochondrial OS=Rattus norvegicus GN=Acadm PE=1 SV=1	sp|P08503|ACADM_RAT	47 kDa	1	1.1
S-adenosylmethionine synthase isoform type-1 OS=Rattus norvegicus GN=Mat1a PE=1 SV=2	sp|P13444|METK1_RAT	44 kDa	1	1.2
Alpha-aminoadipic semialdehyde synthase, mitochondrial OS=Rattus norvegicus GN=Aass PE=2 SV=1	sp|A2VCW9|AASS_RAT	103 kDa	1	0.9
Peptidyl-prolyl cis-trans isomerase A OS=Rattus norvegicus GN=Ppia PE=1 SV=2	sp|P10111|PPIA_RAT	18 kDa	1	1.1
Cluster of Ras-related protein Rab-14 OS=Rattus norvegicus GN=Rab14 PE=1 SV=3 (sp|P61107|RAB14_RAT)	sp|P61107|RAB14_RAT [9]	24 kDa	1	1
Isocitrate dehydrogenase [NADP], mitochondrial OS=Rattus norvegicus GN=Idh2 PE=1 SV=2	sp|P56574|IDHP_RAT	51 kDa	1	1.1
Kynurenine--oxoglutarate transaminase 3 OS=Rattus norvegicus GN=Ccbl2 PE=2 SV=1	sp|Q58FK9|KAT3_RAT	51 kDa	1	1.2
Dihydrolipoyl dehydrogenase, mitochondrial OS=Rattus norvegicus GN=Dld PE=1 SV=1	sp|Q6P6R2|DLDH_RAT	54 kDa	1	1
Beta-ureidopropionase OS=Rattus norvegicus GN=Upb1 PE=1 SV=1	sp|Q03248|BUP1_RAT	44 kDa	1	1.2
Hydroxyacid-oxoacid transhydrogenase, mitochondrial OS=Rattus norvegicus GN=Adhfe1 PE=1 SV=1	sp|Q4QQW3|HOT_RAT	50 kDa	1	1
T-complex protein 1 subunit delta OS=Rattus norvegicus GN=Cct4 PE=1 SV=3	sp|Q7TPB1|TCPD_RAT	58 kDa	1	1
Hydroxyacyl-coenzyme A dehydrogenase, mitochondrial OS=Rattus norvegicus GN=Hadh PE=2 SV=1	sp|Q9WVK7|HCDH_RAT	34 kDa	1	1
NADH dehydrogenase [ubiquinone] iron-sulfur protein 2, mitochondrial OS=Rattus norvegicus GN=Ndufs2 PE=1 SV=1	sp|Q641Y2|NDUS2_RAT	53 kDa	1	0.8
Cluster of Glutathione S-transferase alpha-3 OS=Rattus norvegicus GN=Gsta3 PE=1 SV=3 (sp|P04904|GSTA3_RAT)	sp|P04904|GSTA3_RAT [3]	25 kDa	1	1.2
Membrane-associated progesterone receptor component 1 OS=Rattus norvegicus GN=Pgrmc1 PE=1 SV=3	sp|P70580|PGRC1_RAT	22 kDa	1	0.7
T-complex protein 1 subunit beta OS=Rattus norvegicus GN=Cct2 PE=1 SV=3	sp|Q5XIM9|TCPB_RAT	57 kDa	1	1.2
Lamin-B1 OS=Rattus norvegicus GN=Lmnb1 PE=1 SV=3	sp|P70615|LMNB1_RAT	67 kDa	1	1
Apolipoprotein E OS=Rattus norvegicus GN=Apoe PE=1 SV=2	sp|P02650|APOE_RAT	36 kDa	1	0.8
Alpha-methylacyl-CoA racemase OS=Rattus norvegicus GN=Amacr PE=1 SV=3	sp|P70473|AMACR_RAT	42 kDa	1	1.3
Protein disulfide-isomerase A6 OS=Rattus norvegicus GN=Pdia6 PE=1 SV=2	sp|Q63081|PDIA6_RAT	48 kDa	1	0.7
14-3-3 protein epsilon OS=Rattus norvegicus GN=Ywhae PE=1 SV=1	sp|P62260|1433E_RAT	29 kDa	1	1.1
Dolichyl-diphosphooligosaccharide--protein glycosyltransferase 48 kDa subunit OS=Rattus norvegicus GN=Ddost PE=2 SV=1	sp|Q641Y0|OST48_RAT	49 kDa	1	0.8
Superoxide dismutase [Cu-Zn] OS=Rattus norvegicus GN=Sod1 PE=1 SV=2	sp|P07632|SODC_RAT	16 kDa	1	1.2
Cytochrome P450 2D3 OS=Rattus norvegicus GN=Cyp2d3 PE=2 SV=2	sp|P12938|CP2D3_RAT	57 kDa	1	0.9
Heterogeneous nuclear ribonucleoprotein M OS=Rattus norvegicus GN=Hnrnpm PE=1 SV=4	sp|Q62826|HNRPM_RAT	74 kDa	1	1.3
Alanine--tRNA ligase, cytoplasmic OS=Rattus norvegicus GN=Aars PE=1 SV=3	sp|P50475|SYAC_RAT	107 kDa	1	1
Ectonucleotide pyrophosphatase/phosphodiesterase family member 1 OS=Rattus norvegicus GN=Enpp1 PE=2 SV=2	sp|Q924C3|ENPP1_RAT	103 kDa	1	1
Transmembrane emp24 domain-containing protein 10 OS=Rattus norvegicus GN=Tmed10 PE=1 SV=2	sp|Q63584|TMEDA_RAT	25 kDa	1	0.8
Dihydropteridine reductase OS=Rattus norvegicus GN=Qdpr PE=1 SV=1	sp|P11348|DHPR_RAT	26 kDa	1	1.2
14-3-3 protein zeta/delta OS=Rattus norvegicus GN=Ywhaz PE=1 SV=1	sp|P63102|1433Z_RAT	28 kDa	1	1
Annexin A3 OS=Rattus norvegicus GN=Anxa3 PE=1 SV=4	sp|P14669|ANXA3_RAT	36 kDa	1	0.8
Elongation factor 1-delta OS=Rattus norvegicus GN=Eef1d PE=1 SV=2	sp|Q68FR9|EF1D_RAT	31 kDa	1	1
Alpha-actinin-1 OS=Rattus norvegicus GN=Actn1 PE=1 SV=1	sp|Q9Z1P2|ACTN1_RAT	103 kDa	1	0.8
Trans-2-enoyl-CoA reductase, mitochondrial OS=Rattus norvegicus GN=Mecr PE=2 SV=1	sp|Q9Z311|MECR_RAT	40 kDa	1	1
Probable proline dehydrogenase 2 OS=Rattus norvegicus GN=Prodh2 PE=2 SV=1	sp|Q2V057|PROD2_RAT	51 kDa	1	0.9
Eukaryotic initiation factor 4A-II OS=Rattus norvegicus GN=Eif4a2 PE=1 SV=1	sp|Q5RKI1|IF4A2_RAT	46 kDa	1	1.1
Coatomer subunit delta OS=Rattus norvegicus GN=Arcn1 PE=2 SV=1	sp|Q66H80|COPD_RAT	57 kDa	1	1.1
Unconventional myosin-Ic OS=Rattus norvegicus GN=Myo1c PE=2 SV=2	sp|Q63355|MYO1C_RAT	120 kDa	1	0.9
Glycerol-3-phosphate dehydrogenase, mitochondrial OS=Rattus norvegicus GN=Gpd2 PE=1 SV=1	sp|P35571|GPDM_RAT	81 kDa	1	0.7
Cluster of Transforming protein RhoA OS=Rattus norvegicus GN=Rhoa PE=1 SV=1 (sp|P61589|RHOA_RAT)	sp|P61589|RHOA_RAT	22 kDa	1	1
Acyl-coenzyme A synthetase ACSM3, mitochondrial OS=Rattus norvegicus GN=Acsm3 PE=2 SV=1	sp|Q6SKG1|ACSM3_RAT	66 kDa	1	1
Core histone macro-H2A.1 OS=Rattus norvegicus GN=H2afy PE=1 SV=4	sp|Q02874|H2AY_RAT	40 kDa	1	1
Ras-related protein Rab-11B OS=Rattus norvegicus GN=Rab11b PE=2 SV=4	sp|O35509|RB11B_RAT	24 kDa	1	0.9
Cathepsin B OS=Rattus norvegicus GN=Ctsb PE=1 SV=2	sp|P00787|CATB_RAT	37 kDa	1	1.1
MOSC domain-containing protein 2, mitochondrial OS=Rattus norvegicus GN=Marc2 PE=2 SV=1	sp|O88994|MOSC2_RAT	38 kDa	1	1.1
Peptidyl-prolyl cis-trans isomerase FKBP4 OS=Rattus norvegicus GN=Fkbp4 PE=1 SV=3	sp|Q9QVC8|FKBP4_RAT	51 kDa	1	1.6
Cluster of Serine/threonine-protein phosphatase 2A catalytic subunit alpha isoform OS=Rattus norvegicus GN=Ppp2ca PE=1 SV=1 (sp|P63331|PP2AA_RAT)	sp|P63331|PP2AA_RAT [2]	36 kDa	1	1.1
Carboxypeptidase Q OS=Rattus norvegicus GN=Cpq PE=1 SV=1	sp|Q6IRK9|CBPQ_RAT	52 kDa	1	0.9
Glucokinase OS=Rattus norvegicus GN=Gck PE=1 SV=2	sp|P17712|HXK4_RAT	52 kDa	1	1
Leukotriene A-4 hydrolase OS=Rattus norvegicus GN=Lta4h PE=2 SV=2	sp|P30349|LKHA4_RAT	69 kDa	1	1
Myosin-11 (Fragments) OS=Rattus norvegicus GN=Myh11 PE=2 SV=3	sp|Q63862|MYH11_RAT	152 kDa	1	1.3
Transmembrane emp24 domain-containing protein 5 OS=Rattus norvegicus GN=Tmed5 PE=2 SV=1	sp|Q6AXN3|TMED5_RAT	26 kDa	1	1
Cathepsin Z OS=Rattus norvegicus GN=Ctsz PE=1 SV=2	sp|Q9R1T3|CATZ_RAT	34 kDa	1	1
Inositol 1,4,5-trisphosphate receptor type 2 OS=Rattus norvegicus GN=Itpr2 PE=1 SV=1	sp|P29995|ITPR2_RAT	307 kDa	1	1.2
Adenine phosphoribosyltransferase OS=Rattus norvegicus GN=Aprt PE=1 SV=1	sp|P36972|APT_RAT	20 kDa	1	1.2
Mitochondrial pyruvate carrier 2 OS=Rattus norvegicus GN=Mpc2 PE=2 SV=1	sp|P38718|MPC2_RAT	14 kDa	1	0.9
Thiopurine S-methyltransferase OS=Rattus norvegicus GN=Tpmt PE=2 SV=1	sp|Q9Z0T0|TPMT_RAT	28 kDa	1	0.9
Cytochrome b5 type B OS=Rattus norvegicus GN=Cyb5b PE=1 SV=2	sp|P04166|CYB5B_RAT	16 kDa	1	0.9
Ubiquitin-fold modifier-conjugating enzyme 1 OS=Rattus norvegicus GN=Ufc1 PE=2 SV=1	sp|Q6BBI8|UFC1_RAT	19 kDa	1	1
Calpain-1 catalytic subunit OS=Rattus norvegicus GN=Capn1 PE=1 SV=1	sp|P97571|CAN1_RAT	82 kDa	1	0.7
Tyrosine aminotransferase OS=Rattus norvegicus GN=Tat PE=1 SV=1	sp|P04694|ATTY_RAT	51 kDa	1	0.7
Signal peptidase complex catalytic subunit SEC11A OS=Rattus norvegicus GN=Sec11a PE=2 SV=1	sp|P42667|SC11A_RAT	21 kDa	1	1
NudC domain-containing protein 2 OS=Rattus norvegicus GN=Nudcd2 PE=2 SV=1	sp|Q5M823|NUDC2_RAT	18 kDa	1	1.5
ATP-binding cassette sub-family B member 8, mitochondrial OS=Rattus norvegicus GN=Abcb8 PE=2 SV=1	sp|Q5RKI8|ABCB8_RAT	78 kDa	1	0.7
ATP-binding cassette sub-family B member 7, mitochondrial OS=Rattus norvegicus GN=Abcb7 PE=2 SV=1	sp|Q704E8|ABCB7_RAT	83 kDa	1	0.9
Poly [ADP-ribose] polymerase 1 OS=Rattus norvegicus GN=Parp1 PE=1 SV=4	sp|P27008|PARP1_RAT	113 kDa	1	0.7
Acylamino-acid-releasing enzyme OS=Rattus norvegicus GN=Apeh PE=1 SV=1	sp|P13676|ACPH_RAT	81 kDa	1	1.1
Cytochrome P450 20A1 OS=Rattus norvegicus GN=Cyp20a1 PE=2 SV=1	sp|Q6P7D4|CP20A_RAT	52 kDa	1	1.2
Phenazine biosynthesis-like domain-containing protein OS=Rattus norvegicus GN=Pbld PE=2 SV=1	sp|Q68G31|PBLD_RAT	32 kDa	1	1.2
40S ribosomal protein S26 OS=Rattus norvegicus GN=Rps26 PE=3 SV=3	sp|P62856|RS26_RAT	13 kDa	1	1.1
Importin subunit beta-1 OS=Rattus norvegicus GN=Kpnb1 PE=1 SV=1	sp|P52296|IMB1_RAT	97 kDa	1	0.7
[Pyruvate dehydrogenase [lipoamide]] kinase isozyme 1, mitochondrial OS=Rattus norvegicus GN=Pdk1 PE=1 SV=1	sp|Q63065|PDK1_RAT	49 kDa	1	0.8
Cluster of T-kininogen 1 OS=Rattus norvegicus GN=Map1 PE=1 SV=2 (sp|P01048|KNT1_RAT)	sp|P01048|KNT1_RAT [2]	48 kDa	1	1.5
Carbamoyl-phosphate synthase [ammonia], mitochondrial OS=Rattus norvegicus GN=Cps1 PE=1 SV=1	sp|P07756|CPSM_RAT	165 kDa	1	1.2
Glutamate dehydrogenase 1, mitochondrial OS=Rattus norvegicus GN=Glud1 PE=1 SV=2	sp|P10860|DHE3_RAT	61 kDa	1	1.2
ATP synthase subunit beta, mitochondrial OS=Rattus norvegicus GN=Atp5b PE=1 SV=2	sp|P10719|ATPB_RAT	56 kDa	1	1
Fructose-bisphosphate aldolase B OS=Rattus norvegicus GN=Aldob PE=1 SV=2	sp|P00884|ALDOB_RAT	40 kDa	1	1
Cluster of Aldehyde dehydrogenase, mitochondrial OS=Rattus norvegicus GN=Aldh2 PE=1 SV=1 (sp|P11884|ALDH2_RAT)	sp|P11884|ALDH2_RAT [3]	56 kDa	1	1
Cluster of Actin, cytoplasmic 2 OS=Rattus norvegicus GN=Actg1 PE=1 SV=1 (sp|P63259|ACTG_RAT)	sp|P63259|ACTG_RAT [2]	42 kDa	1	0.9
Betaine--homocysteine S-methyltransferase 1 OS=Rattus norvegicus GN=Bhmt PE=1 SV=1	sp|O09171|BHMT1_RAT	45 kDa	1	0.9
Cluster of Alpha-enolase OS=Rattus norvegicus GN=Eno1 PE=1 SV=4 (sp|P04764|ENOA_RAT)	sp|P04764|ENOA_RAT [3]	47 kDa	1	0.9
Cluster of Glyceraldehyde-3-phosphate dehydrogenase OS=Rattus norvegicus GN=Gapdh PE=1 SV=3 (sp|P04797|G3P_RAT)	sp|P04797|G3P_RAT	36 kDa	1	0.9
Peroxisomal multifunctional enzyme type 2 OS=Rattus norvegicus GN=Hsd17b4 PE=1 SV=3	sp|P97852|DHB4_RAT	79 kDa	1	1
Cluster of Alcohol dehydrogenase 1 OS=Rattus norvegicus GN=Adh1 PE=1 SV=3 (sp|P06757|ADH1_RAT)	sp|P06757|ADH1_RAT	40 kDa	1	1.3
Glycerol-3-phosphate dehydrogenase [NAD(+)], cytoplasmic OS=Rattus norvegicus GN=Gpd1 PE=1 SV=4	sp|O35077|GPDA_RAT	37 kDa	1	1
2,4-dienoyl-CoA reductase, mitochondrial OS=Rattus norvegicus GN=Decr1 PE=1 SV=2	sp|Q64591|DECR_RAT	36 kDa	1	0.9
Staphylococcal nuclease domain-containing protein 1 OS=Rattus norvegicus GN=Snd1 PE=2 SV=1	sp|Q66X93|SND1_RAT	102 kDa	1	1
Non-specific lipid-transfer protein OS=Rattus norvegicus GN=Scp2 PE=1 SV=3	sp|P11915|NLTP_RAT	59 kDa	1	1
Cluster of Sodium/potassium-transporting ATPase subunit alpha-1 OS=Rattus norvegicus GN=Atp1a1 PE=1 SV=1 (sp|P06685|AT1A1_RAT)	sp|P06685|AT1A1_RAT [5]	113 kDa	1	0.9
UDP-glucose:glycoprotein glucosyltransferase 1 OS=Rattus norvegicus GN=Uggt1 PE=1 SV=2	sp|Q9JLA3|UGGG1_RAT	176 kDa	1	1
60S ribosomal protein L5 OS=Rattus norvegicus GN=Rpl5 PE=1 SV=3	sp|P09895|RL5_RAT	34 kDa	1	1.4
Calmodulin OS=Rattus norvegicus GN=Calm1 PE=1 SV=2	sp|P62161|CALM_RAT	17 kDa	1	1.1
Protein DJ-1 OS=Rattus norvegicus GN=Park7 PE=1 SV=1	sp|O88767|PARK7_RAT	20 kDa	1	1
DnaJ homolog subfamily B member 11 OS=Rattus norvegicus GN=Dnajb11 PE=2 SV=1	sp|Q6TUG0|DJB11_RAT	40 kDa	1	0.9
Sideroflexin-1 OS=Rattus norvegicus GN=Sfxn1 PE=2 SV=4	sp|Q63965|SFXN1_RAT	36 kDa	1	0.9
60S ribosomal protein L18 OS=Rattus norvegicus GN=Rpl18 PE=2 SV=2	sp|P12001|RL18_RAT	22 kDa	1	1.3
Glycine--tRNA ligase (Fragment) OS=Rattus norvegicus GN=Gars PE=1 SV=1	sp|Q5I0G4|SYG_RAT	72 kDa	1	0.9
Golgin subfamily A member 4 OS=Rattus norvegicus GN=Golga4 PE=1 SV=2	sp|Q5U4E6|GOGA4_RAT	260 kDa	1	1.4
Annexin A2 OS=Rattus norvegicus GN=Anxa2 PE=1 SV=2	sp|Q07936|ANXA2_RAT	39 kDa	1	0.8
Regulator of microtubule dynamics protein 3 OS=Rattus norvegicus GN=Fam82a2 PE=2 SV=1	sp|Q66H15|RMD3_RAT	52 kDa	1	1
60S ribosomal protein L37 OS=Rattus norvegicus GN=Rpl37 PE=1 SV=2	sp|P61928|RL37_RAT	11 kDa	1	1.8
Probable Xaa-Pro aminopeptidase 3 OS=Rattus norvegicus GN=Xpnpep3 PE=1 SV=1	sp|B5DEQ3|XPP3_RAT	56 kDa	1	1
ADP-ribosylation factor-like protein 1 OS=Rattus norvegicus GN=Arl1 PE=1 SV=1	sp|P61212|ARL1_RAT	20 kDa	1	0.9
Sodium/potassium-transporting ATPase subunit beta-3 OS=Rattus norvegicus GN=Atp1b3 PE=2 SV=1	sp|Q63377|AT1B3_RAT	32 kDa	1	0.9
Thioredoxin reductase 1, cytoplasmic OS=Rattus norvegicus GN=Txnrd1 PE=1 SV=5	sp|O89049|TRXR1_RAT	55 kDa	1	0.9
V-type proton ATPase 116 kDa subunit a isoform 1 OS=Rattus norvegicus GN=Atp6v0a1 PE=2 SV=1	sp|P25286|VPP1_RAT	96 kDa	1	0.9
Peroxisomal membrane protein 2 OS=Rattus norvegicus GN=Pxmp2 PE=1 SV=2	sp|Q07066|PXMP2_RAT	23 kDa	1	1
Lys-63-specific deubiquitinase BRCC36 OS=Rattus norvegicus GN=Brcc3 PE=2 SV=1	sp|B2RYM5|BRCC3_RAT	33 kDa	1	1.7
Atlastin-3 OS=Rattus norvegicus GN=Atl3 PE=2 SV=2	sp|Q0ZHH6|ATLA3_RAT	61 kDa	1	0.9
Charged multivesicular body protein 5 OS=Rattus norvegicus GN=Chmp5 PE=2 SV=1	sp|Q4QQV8|CHMP5_RAT	25 kDa	1	0.4
L-asparaginase OS=Rattus norvegicus GN=Asrgl1 PE=1 SV=1	sp|Q8VI04|ASGL1_RAT	34 kDa	1	1.2
Acylpyruvase FAHD1, mitochondrial OS=Rattus norvegicus GN=Fahd1 PE=2 SV=1	sp|Q6AYQ8|FAHD1_RAT	24 kDa	1	1.1
Serine/threonine-protein kinase MRCK beta OS=Rattus norvegicus GN=Cdc42bpb PE=1 SV=1	sp|Q7TT49|MRCKB_RAT	195 kDa	1	1
WD repeat-containing protein 61 OS=Rattus norvegicus GN=Wdr61 PE=1 SV=1	sp|Q4V7A0|WDR61_RAT	34 kDa	1	0.9
Thymidine phosphorylase OS=Rattus norvegicus GN=Tymp PE=2 SV=1	sp|Q5FVR2|TYPH_RAT	50 kDa	1	1
Tubulointerstitial nephritis antigen-like OS=Rattus norvegicus GN=Tinagl1 PE=2 SV=1	sp|Q9EQT5|TINAL_RAT	53 kDa	1	1
AP-1 complex subunit mu-1 OS=Rattus norvegicus GN=Ap1m1 PE=1 SV=3	sp|Q32Q06|AP1M1_RAT	49 kDa	1	0.8
6-phosphogluconolactonase OS=Rattus norvegicus GN=Pgls PE=1 SV=1	sp|P85971|6PGL_RAT	27 kDa	1	1.1
Ribosomal protein S6 kinase alpha-1 OS=Rattus norvegicus GN=Rps6ka1 PE=1 SV=1	sp|Q63531|KS6A1_RAT	83 kDa	1	0.8
Pyruvate kinase isozymes R/L OS=Rattus norvegicus GN=Pklr PE=2 SV=2	sp|P12928|KPYR_RAT	62 kDa	1	0.8
Delta(3,5)-Delta(2,4)-dienoyl-CoA isomerase, mitochondrial OS=Rattus norvegicus GN=Ech1 PE=1 SV=2	sp|Q62651|ECH1_RAT	36 kDa	1	1.1
Afadin OS=Rattus norvegicus GN=Mllt4 PE=1 SV=1	sp|O35889|AFAD_RAT	208 kDa	1	1.2
E3 ubiquitin-protein ligase NEDD4 OS=Rattus norvegicus GN=Nedd4 PE=1 SV=1	sp|Q62940|NEDD4_RAT	102 kDa	1	1.1
Cluster of Spliceosome RNA helicase Ddx39b OS=Rattus norvegicus GN=Ddx39b PE=1 SV=3 (sp|Q63413|DX39B_RAT)	sp|Q63413|DX39B_RAT [2]	49 kDa	1	1
ATP synthase subunit alpha, mitochondrial OS=Rattus norvegicus GN=Atp5a1 PE=1 SV=2	sp|P15999|ATPA_RAT	60 kDa	1	1
3-ketoacyl-CoA thiolase, mitochondrial OS=Rattus norvegicus GN=Acaa2 PE=1 SV=1	sp|P13437|THIM_RAT	42 kDa	1	0.9
Stress-70 protein, mitochondrial OS=Rattus norvegicus GN=Hspa9 PE=1 SV=3	sp|P48721|GRP75_RAT	74 kDa	1	0.9
Endoplasmin OS=Rattus norvegicus GN=Hsp90b1 PE=1 SV=2	sp|Q66HD0|ENPL_RAT	93 kDa	1	0.9
Adenosylhomocysteinase OS=Rattus norvegicus GN=Ahcy PE=1 SV=3	sp|P10760|SAHH_RAT	48 kDa	1	1.1
Trifunctional enzyme subunit alpha, mitochondrial OS=Rattus norvegicus GN=Hadha PE=1 SV=2	sp|Q64428|ECHA_RAT	83 kDa	1	0.8
Sorbitol dehydrogenase OS=Rattus norvegicus GN=Sord PE=1 SV=4	sp|P27867|DHSO_RAT	38 kDa	1	1.3
Cytochrome P450 2E1 OS=Rattus norvegicus GN=Cyp2e1 PE=1 SV=4	sp|P05182|CP2E1_RAT	57 kDa	1	1.4
Bile acid-CoA:amino acid N-acyltransferase OS=Rattus norvegicus GN=Baat PE=1 SV=2	sp|Q63276|BAAT_RAT	46 kDa	1	1
Long-chain-fatty-acid--CoA ligase 5 OS=Rattus norvegicus GN=Acsl5 PE=2 SV=1	sp|O88813|ACSL5_RAT	76 kDa	1	1.1
Glutathione peroxidase 1 OS=Rattus norvegicus GN=Gpx1 PE=1 SV=4	sp|P04041|GPX1_RAT	22 kDa	1	1.4
Microsomal glutathione S-transferase 1 OS=Rattus norvegicus GN=Mgst1 PE=1 SV=3	sp|P08011|MGST1_RAT	17 kDa	1	0.9
26S protease regulatory subunit 8 OS=Rattus norvegicus GN=Psmc5 PE=1 SV=1	sp|P62198|PRS8_RAT	46 kDa	1	1.1
ATP-dependent zinc metalloprotease YME1L1 OS=Rattus norvegicus GN=Yme1l1 PE=2 SV=1	sp|Q925S8|YMEL1_RAT	80 kDa	1	0.8
60 kDa lysophospholipase OS=Rattus norvegicus GN=Aspg PE=1 SV=1	sp|O88202|LPP60_RAT	61 kDa	1	1
Cytochrome P450 2D4 OS=Rattus norvegicus GN=Cyp2d4 PE=2 SV=2	sp|P13108|CP2D4_RAT (+1)	57 kDa	1	0.6
Annexin A1 OS=Rattus norvegicus GN=Anxa1 PE=1 SV=2	sp|P07150|ANXA1_RAT	39 kDa	1	0.9
Coiled-coil domain-containing protein 47 OS=Rattus norvegicus GN=Ccdc47 PE=2 SV=1	sp|Q5U2X6|CCD47_RAT	56 kDa	1	0.9
Exocyst complex component 8 OS=Rattus norvegicus GN=Exoc8 PE=1 SV=1	sp|O54924|EXOC8_RAT	81 kDa	1	1.3
Heterogeneous nuclear ribonucleoprotein H2 OS=Rattus norvegicus GN=Hnrnph2 PE=1 SV=1	sp|Q6AY09|HNRH2_RAT	49 kDa	1	1
Prefoldin subunit 2 OS=Rattus norvegicus GN=Pfdn2 PE=2 SV=1	sp|B0BN18|PFD2_RAT	17 kDa	1	1
Sideroflexin-5 OS=Rattus norvegicus GN=Sfxn5 PE=2 SV=1	sp|Q8CFD0|SFXN5_RAT	37 kDa	1	0.9
Dolichyl-diphosphooligosaccharide--protein glycosyltransferase subunit DAD1 OS=Rattus norvegicus GN=Dad1 PE=2 SV=3	sp|P61805|DAD1_RAT	12 kDa	1	1.1
26S protease regulatory subunit 4 OS=Rattus norvegicus GN=Psmc1 PE=2 SV=1	sp|P62193|PRS4_RAT	49 kDa	1	1.1
Heterogeneous nuclear ribonucleoprotein Q OS=Rattus norvegicus GN=Syncrip PE=2 SV=1	sp|Q7TP47|HNRPQ_RAT	60 kDa	1	1
Cluster of Retinal dehydrogenase 1 OS=Rattus norvegicus GN=Aldh1a1 PE=1 SV=3 (sp|P51647|AL1A1_RAT)	sp|P51647|AL1A1_RAT [2]	54 kDa	1	1.1
Calpain-2 catalytic subunit OS=Rattus norvegicus GN=Capn2 PE=1 SV=3	sp|Q07009|CAN2_RAT	80 kDa	1	1
Rab3 GTPase-activating protein non-catalytic subunit OS=Rattus norvegicus GN=Rab3gap2 PE=1 SV=2	sp|Q5U1Z0|RBGPR_RAT	154 kDa	1	1
60 kDa heat shock protein, mitochondrial OS=Rattus norvegicus GN=Hspd1 PE=1 SV=1	sp|P63039|CH60_RAT	61 kDa	1	1.1
Fatty acid-binding protein, liver OS=Rattus norvegicus GN=Fabp1 PE=1 SV=1	sp|P02692|FABPL_RAT	14 kDa	1	1
Ribonuclease UK114 OS=Rattus norvegicus GN=Hrsp12 PE=1 SV=3	sp|P52759|UK114_RAT	14 kDa	1	1.3
Enoyl-CoA hydratase, mitochondrial OS=Rattus norvegicus GN=Echs1 PE=1 SV=1	sp|P14604|ECHM_RAT	32 kDa	1	1
Transitional endoplasmic reticulum ATPase OS=Rattus norvegicus GN=Vcp PE=1 SV=3	sp|P46462|TERA_RAT	89 kDa	1	1
Dihydropyrimidinase OS=Rattus norvegicus GN=Dpys PE=1 SV=2	sp|Q63150|DPYS_RAT	57 kDa	1	1.2
Major urinary protein OS=Rattus norvegicus PE=1 SV=1	sp|P02761|MUP_RAT	21 kDa	1	0.8
Cluster of Adenylyl cyclase-associated protein 1 OS=Rattus norvegicus GN=Cap1 PE=1 SV=3 (sp|Q08163|CAP1_RAT)	sp|Q08163|CAP1_RAT	52 kDa	1	1.3
Bifunctional purine biosynthesis protein PURH OS=Rattus norvegicus GN=Atic PE=1 SV=2	sp|O35567|PUR9_RAT	64 kDa	1	1
14-3-3 protein gamma OS=Rattus norvegicus GN=Ywhag PE=1 SV=2	sp|P61983|1433G_RAT	28 kDa	1	0.9
Eukaryotic initiation factor 4A-III OS=Rattus norvegicus GN=Eif4a3 PE=1 SV=1	sp|Q3B8Q2|IF4A3_RAT	47 kDa	1	1
Solute carrier family 2, facilitated glucose transporter member 2 OS=Rattus norvegicus GN=Slc2a2 PE=2 SV=1	sp|P12336|GTR2_RAT	57 kDa	1	0.8
FAD-linked sulfhydryl oxidase ALR OS=Rattus norvegicus GN=Gfer PE=1 SV=2	sp|Q63042|ALR_RAT	23 kDa	1	1.1
Prostaglandin F2 receptor negative regulator OS=Rattus norvegicus GN=Ptgfrn PE=1 SV=1	sp|Q62786|FPRP_RAT	99 kDa	1	3
Eukaryotic translation initiation factor 1A OS=Rattus norvegicus GN=Eif1a PE=2 SV=3	sp|Q6VV72|IF1A_RAT	17 kDa	1	0.8
Golgi phosphoprotein 3 OS=Rattus norvegicus GN=Golph3 PE=1 SV=1	sp|Q9ERE4|GOLP3_RAT	34 kDa	1	1
Porphobilinogen deaminase OS=Rattus norvegicus GN=Hmbs PE=1 SV=2	sp|P19356|HEM3_RAT	39 kDa	1	2
Cluster of Histone H2A type 2-A OS=Rattus norvegicus GN=Hist2h2aa3 PE=1 SV=1 (sp|P0CC09|H2A2A_RAT)	sp|P0CC09|H2A2A_RAT [3]	14 kDa	1	1
Rho-associated protein kinase 1 OS=Rattus norvegicus GN=Rock1 PE=1 SV=1	sp|Q63644|ROCK1_RAT	160 kDa	1	1.1
Phospholysine phosphohistidine inorganic pyrophosphate phosphatase OS=Rattus norvegicus GN=Lhpp PE=2 SV=1	sp|Q5I0D5|LHPP_RAT	29 kDa	1	1.7
Paraspeckle component 1 OS=Rattus norvegicus GN=Pspc1 PE=2 SV=1	sp|Q4KLH4|PSPC1_RAT	59 kDa	1	2.4
28S ribosomal protein S31, mitochondrial OS=Rattus norvegicus GN=Mrps31 PE=2 SV=1	sp|B0BN56|RT31_RAT	44 kDa	1	0.8
60S ribosomal protein L10 OS=Rattus norvegicus GN=Rpl10 PE=1 SV=3	sp|Q6PDV7|RL10_RAT	25 kDa	1	1.1
Isopentenyl-diphosphate Delta-isomerase 1 OS=Rattus norvegicus GN=Idi1 PE=2 SV=2	sp|O35760|IDI1_RAT	26 kDa	1	1.2
Synaptopodin OS=Rattus norvegicus GN=Synpo PE=2 SV=2	sp|Q9Z327|SYNPO_RAT	100 kDa	1	1.1
DNA (cytosine-5)-methyltransferase 3A OS=Rattus norvegicus GN=Dnmt3a PE=2 SV=1	sp|Q1LZ53|DNM3A_RAT	102 kDa	1	1.5
Protein OS-9 OS=Rattus norvegicus GN=Os9 PE=1 SV=1	sp|Q5RKH6|OS9_RAT	75 kDa	1	0.9
Annexin A4 OS=Rattus norvegicus GN=Anxa4 PE=1 SV=3	sp|P55260|ANXA4_RAT	36 kDa	1	0.7
26S proteasome non-ATPase regulatory subunit 2 OS=Rattus norvegicus GN=Psmd2 PE=2 SV=1	sp|Q4FZT9|PSMD2_RAT	100 kDa	1	1.2
Heterogeneous nuclear ribonucleoprotein F OS=Rattus norvegicus GN=Hnrnpf PE=1 SV=3	sp|Q794E4|HNRPF_RAT	46 kDa	1	1.4
Cytochrome b-c1 complex subunit 6, mitochondrial OS=Rattus norvegicus GN=Uqcrh PE=2 SV=1	sp|Q5M9I5|QCR6_RAT	10 kDa	1	0.9
15 kDa selenoprotein OS=Rattus norvegicus GN=Sep15 PE=1 SV=3	sp|Q923V8|SEP15_RAT	18 kDa	1	1
Collagen alpha-1(I) chain OS=Rattus norvegicus GN=Col1a1 PE=1 SV=5	sp|P02454|CO1A1_RAT	138 kDa	1	1.1
Regulator of microtubule dynamics protein 1 OS=Rattus norvegicus GN=Fam82b PE=2 SV=1	sp|Q4G069|RMD1_RAT	35 kDa	1	1
Band 4.1-like protein 1 OS=Rattus norvegicus GN=Epb41l1 PE=1 SV=1	sp|Q9WTP0|E41L1_RAT	98 kDa	1	1
Alpha-2-macroglobulin receptor-associated protein OS=Rattus norvegicus GN=Lrpap1 PE=1 SV=2	sp|Q99068|AMRP_RAT	42 kDa	1	1.1
14-3-3 protein beta/alpha OS=Rattus norvegicus GN=Ywhab PE=1 SV=3	sp|P35213|1433B_RAT	28 kDa	1	1
Activated RNA polymerase II transcriptional coactivator p15 OS=Rattus norvegicus GN=Sub1 PE=2 SV=3	sp|Q63396|TCP4_RAT	14 kDa	1	0.7
Platelet-activating factor acetylhydrolase 2, cytoplasmic OS=Rattus norvegicus GN=Pafah2 PE=1 SV=2	sp|P83006|PAFA2_RAT	43 kDa	1	0.9
Cadherin EGF LAG seven-pass G-type receptor 3 OS=Rattus norvegicus GN=Celsr3 PE=2 SV=1	sp|O88278|CELR3_RAT	359 kDa	1	0.3
PCNA-interacting partner OS=Rattus norvegicus GN=Parpbp PE=1 SV=2	sp|Q9EQ10|PARI_RAT	64 kDa	1	1
Retinol-binding protein 4 OS=Rattus norvegicus GN=Rbp4 PE=1 SV=1	sp|P04916|RET4_RAT	23 kDa	1	0.8
C-type lectin domain family 4 member F OS=Rattus norvegicus GN=Clec4f PE=1 SV=1	sp|P10716|CLC4F_RAT	61 kDa	1	1.4
Aspartate--tRNA ligase, mitochondrial OS=Rattus norvegicus GN=Dars2 PE=2 SV=1	sp|Q3KRD0|SYDM_RAT	74 kDa	1	0.8
Syntaxin-5 OS=Rattus norvegicus GN=Stx5 PE=1 SV=2	sp|Q08851|STX5_RAT	40 kDa	1	0.8
ATP-dependent RNA helicase SUPV3L1, mitochondrial OS=Rattus norvegicus GN=Supv3l1 PE=2 SV=1	sp|Q5EBA1|SUV3_RAT	87 kDa	1	1.1
Carbonyl reductase [NADPH] 1 OS=Rattus norvegicus GN=Cbr1 PE=1 SV=2	sp|P47727|CBR1_RAT	31 kDa	1	0.9
Guanylate cyclase soluble subunit alpha-3 OS=Rattus norvegicus GN=Gucy1a3 PE=1 SV=1	sp|P19686|GCYA3_RAT	78 kDa	1	0.7
Hsp90 co-chaperone Cdc37 OS=Rattus norvegicus GN=Cdc37 PE=1 SV=2	sp|Q63692|CDC37_RAT	45 kDa	1	0.9
Keratin, type I cytoskeletal 18 OS=Rattus norvegicus GN=Krt18 PE=1 SV=3	sp|Q5BJY9|K1C18_RAT	48 kDa	1	0.8
Voltage-dependent anion-selective channel protein 1 OS=Rattus norvegicus GN=Vdac1 PE=1 SV=4	sp|Q9Z2L0|VDAC1_RAT	31 kDa	1	0.8
Calreticulin OS=Rattus norvegicus GN=Calr PE=1 SV=1	sp|P18418|CALR_RAT	48 kDa	1	0.8
Adenylate kinase 2, mitochondrial OS=Rattus norvegicus GN=Ak2 PE=2 SV=2	sp|P29410|KAD2_RAT	26 kDa	1	1.3
60S ribosomal protein L17 OS=Rattus norvegicus GN=Rpl17 PE=2 SV=3	sp|P24049|RL17_RAT	21 kDa	1	1.3
Multifunctional protein ADE2 OS=Rattus norvegicus GN=Paics PE=2 SV=3	sp|P51583|PUR6_RAT	47 kDa	1	0.9
D-beta-hydroxybutyrate dehydrogenase, mitochondrial OS=Rattus norvegicus GN=Bdh1 PE=1 SV=2	sp|P29147|BDH_RAT	38 kDa	1	0.8
Voltage-dependent anion-selective channel protein 2 OS=Rattus norvegicus GN=Vdac2 PE=1 SV=2	sp|P81155|VDAC2_RAT	32 kDa	1	0.8
Synaptic vesicle membrane protein VAT-1 homolog OS=Rattus norvegicus GN=Vat1 PE=1 SV=1	sp|Q3MIE4|VAT1_RAT	43 kDa	1	1.2
Hypoxanthine-guanine phosphoribosyltransferase OS=Rattus norvegicus GN=Hprt1 PE=1 SV=1	sp|P27605|HPRT_RAT	24 kDa	1	1.1
Glucosamine--fructose-6-phosphate aminotransferase [isomerizing] 1 OS=Rattus norvegicus GN=Gfpt1 PE=1 SV=3	sp|P82808|GFPT1_RAT	77 kDa	1	1
Serine protease inhibitor A3K OS=Rattus norvegicus GN=Serpina3k PE=1 SV=3	sp|P05545|SPA3K_RAT	47 kDa	1	1
Cluster of Brefeldin A-inhibited guanine nucleotide-exchange protein 2 OS=Rattus norvegicus GN=Arfgef2 PE=1 SV=1 (sp|Q7TSU1|BIG2_RAT)	sp|Q7TSU1|BIG2_RAT [2]	202 kDa	1	1
Sorting nexin-27 OS=Rattus norvegicus GN=Snx27 PE=1 SV=2	sp|Q8K4V4|SNX27_RAT	61 kDa	1	0.9
Bromodomain-containing protein 2 OS=Rattus norvegicus GN=Brd2 PE=2 SV=1	sp|Q6MGA9|BRD2_RAT	88 kDa	1	3.3
Endoplasmic reticulum aminopeptidase 1 OS=Rattus norvegicus GN=Erap1 PE=2 SV=2	sp|Q9JJ22|ERAP1_RAT	106 kDa	1	0.9
UV excision repair protein RAD23 homolog B OS=Rattus norvegicus GN=Rad23b PE=1 SV=1	sp|Q4KMA2|RD23B_RAT	43 kDa	1	1.2
Bifunctional UDP-N-acetylglucosamine 2-epimerase/N-acetylmannosamine kinase OS=Rattus norvegicus GN=Gne PE=1 SV=1	sp|O35826|GLCNE_RAT	79 kDa	1	1.3
Ras-related protein Rab-18 OS=Rattus norvegicus GN=Rab18 PE=2 SV=1	sp|Q5EB77|RAB18_RAT	23 kDa	1	0.8
2'-5'-oligoadenylate synthase 1A OS=Rattus norvegicus GN=Oas1a PE=2 SV=1	sp|Q05961|OAS1A_RAT	42 kDa	1	1.1
Ectonucleoside triphosphate diphosphohydrolase 5 OS=Rattus norvegicus GN=Entpd5 PE=2 SV=1	sp|Q6P6S9|ENTP5_RAT	47 kDa	1	0.8
Cluster of Tubulin alpha-1C chain OS=Rattus norvegicus GN=Tuba1c PE=1 SV=1 (sp|Q6AYZ1|TBA1C_RAT)	sp|Q6AYZ1|TBA1C_RAT [3]	50 kDa	1	1
Fumarylacetoacetate hydrolase domain-containing protein 2 OS=Rattus norvegicus GN=Fahd2 PE=1 SV=1	sp|B2RYW9|FAHD2_RAT	35 kDa	1	0.9
Transient receptor potential cation channel subfamily M member 8 OS=Rattus norvegicus GN=Trpm8 PE=1 SV=4	sp|Q8R455|TRPM8_RAT	128 kDa	1	1
40S ribosomal protein S6 OS=Rattus norvegicus GN=Rps6 PE=1 SV=1	sp|P62755|RS6_RAT	29 kDa	1	1.1
Aminopeptidase B OS=Rattus norvegicus GN=Rnpep PE=1 SV=2	sp|O09175|AMPB_RAT	73 kDa	1	0.9
Collagen alpha-1(XI) chain OS=Rattus norvegicus GN=Col11a1 PE=1 SV=2	sp|P20909|COBA1_RAT	181 kDa	1	11.8
Protein phosphatase 1F OS=Rattus norvegicus GN=Ppm1f PE=2 SV=1	sp|Q9WVR7|PPM1F_RAT	49 kDa	1	0.1
Cluster of Bile salt sulfotransferase OS=Rattus norvegicus GN=St2a1 PE=2 SV=3 (sp|P15709|ST2A1_RAT)	sp|P15709|ST2A1_RAT [4]	33 kDa	1	1.2
Sodium/bile acid cotransporter OS=Rattus norvegicus GN=Slc10a1 PE=2 SV=1	sp|P26435|NTCP_RAT	39 kDa	1	1.2
Galectin-1 OS=Rattus norvegicus GN=Lgals1 PE=1 SV=2	sp|P11762|LEG1_RAT	15 kDa	1	0.6
Lipase maturation factor 2 OS=Rattus norvegicus GN=Lmf2 PE=2 SV=1	sp|A1L1J9|LMF2_RAT	80 kDa	1	0.7
Protein FAM105A OS=Rattus norvegicus GN=Fam105a PE=2 SV=1	sp|Q3B7D8|F105A_RAT	42 kDa	1	8.4
Dihydrolipoyllysine-residue succinyltransferase component of 2-oxoglutarate dehydrogenase complex, mitochondrial OS=Rattus norvegicus GN=Dlst PE=1 SV=2	sp|Q01205|ODO2_RAT	49 kDa	1	1.2
Zinc finger CCCH domain-containing protein 18 OS=Rattus norvegicus GN=Zc3h18 PE=1 SV=1	sp|Q6TQE1|ZCH18_RAT	106 kDa	1	0.6
Bifunctional ATP-dependent dihydroxyacetone kinase/FAD-AMP lyase (cyclizing) OS=Rattus norvegicus GN=Dak PE=1 SV=1	sp|Q4KLZ6|DHAK_RAT	59 kDa	1	1.1
Xaa-Pro dipeptidase OS=Rattus norvegicus GN=Pepd PE=2 SV=1	sp|Q5I0D7|PEPD_RAT	55 kDa	1	1.2
Dual specificity testis-specific protein kinase 1 OS=Rattus norvegicus GN=Tesk1 PE=1 SV=1	sp|Q63572|TESK1_RAT	68 kDa	1	0.8
Alpha-mannosidase 2C1 OS=Rattus norvegicus GN=Man2c1 PE=1 SV=1	sp|P21139|MA2C1_RAT	116 kDa	1	4.6
Ankyrin repeat and LEM domain-containing protein 2 OS=Rattus norvegicus GN=Ankle2 PE=2 SV=2	sp|Q7TP65|ANKL2_RAT	106 kDa	1	16.8
Methionine aminopeptidase 2 OS=Rattus norvegicus GN=Metap2 PE=1 SV=2	sp|P38062|AMPM2_RAT	53 kDa	1	0.8
Serine--tRNA ligase, cytoplasmic OS=Rattus norvegicus GN=Sars PE=1 SV=3	sp|Q6P799|SYSC_RAT	59 kDa	1	1.2
Junctional adhesion molecule A OS=Rattus norvegicus GN=F11r PE=1 SV=1	sp|Q9JHY1|JAM1_RAT	32 kDa	1	1
Transcriptional activator protein Pur-beta OS=Rattus norvegicus GN=Purb PE=1 SV=3	sp|Q68A21|PURB_RAT	33 kDa	1	1.2
Mitochondrial Rho GTPase 2 OS=Rattus norvegicus GN=Rhot2 PE=2 SV=1	sp|Q7TSA0|MIRO2_RAT	69 kDa	1	0.4
HBS1-like protein OS=Rattus norvegicus GN=Hbs1l PE=2 SV=1	sp|Q6AXM7|HBS1L_RAT	75 kDa	1	0.8
Structural maintenance of chromosomes protein 1A OS=Rattus norvegicus GN=Smc1a PE=1 SV=1	sp|Q9Z1M9|SMC1A_RAT	143 kDa	1	1.2
Kinesin-like protein KIF1B OS=Rattus norvegicus GN=Kif1b PE=1 SV=2	sp|O88658|KIF1B_RAT	204 kDa	1	1
Cytochrome P450 2B15 OS=Rattus norvegicus GN=Cyp2b15 PE=2 SV=2	sp|Q64583|CP2BF_RAT	56 kDa	1	1.1
S-phase kinase-associated protein 1 OS=Rattus norvegicus GN=Skp1 PE=2 SV=3	sp|Q6PEC4|SKP1_RAT	19 kDa	1	0.8
Serine/threonine-protein phosphatase 5 OS=Rattus norvegicus GN=Ppp5c PE=2 SV=1	sp|P53042|PPP5_RAT	57 kDa	1	1.3
DNA (cytosine-5)-methyltransferase 1 OS=Rattus norvegicus GN=Dnmt1 PE=1 SV=2	sp|Q9Z330|DNMT1_RAT	183 kDa	1	1
Glutamine-dependent NAD(+) synthetase OS=Rattus norvegicus GN=Nadsyn1 PE=2 SV=1	sp|Q812E8|NADE_RAT	82 kDa	1	0.9
Synaptojanin-2-binding protein OS=Rattus norvegicus GN=Synj2bp PE=1 SV=2	sp|Q9WVJ4|SYJ2B_RAT	16 kDa	1	0.9
Creatine kinase B-type OS=Rattus norvegicus GN=Ckb PE=1 SV=2	sp|P07335|KCRB_RAT	43 kDa	1	1
UPF0554 protein C2orf43 homolog OS=Rattus norvegicus PE=2 SV=1	sp|Q5HZX7|CB043_RAT	37 kDa	1	0.8
Septin-7 OS=Rattus norvegicus GN=Sept7 PE=1 SV=1	sp|Q9WVC0|SEPT7_RAT	51 kDa	1	1
Ribosome biogenesis regulatory protein homolog OS=Rattus norvegicus GN=Rrs1 PE=2 SV=1	sp|A1A5P2|RRS1_RAT	42 kDa	1	0.9
Mothers against decapentaplegic homolog 3 OS=Rattus norvegicus GN=Smad3 PE=1 SV=1	sp|P84025|SMAD3_RAT	48 kDa	1	0.1
Rab GTPase-binding effector protein 2 OS=Rattus norvegicus GN=Rabep2 PE=2 SV=1	sp|Q62835|RABE2_RAT	62 kDa	1	1.4
Copper transport protein ATOX1 OS=Rattus norvegicus GN=Atox1 PE=1 SV=1	sp|Q9WUC4|ATOX1_RAT	7 kDa	1	1.1
Protein jagged-1 OS=Rattus norvegicus GN=Jag1 PE=1 SV=2	sp|Q63722|JAG1_RAT	134 kDa	1	0.1
Iron-sulfur cluster assembly 1 homolog, mitochondrial OS=Rattus norvegicus GN=Isca1 PE=2 SV=1	sp|Q80W96|ISCA1_RAT	14 kDa	1	0.9
RNA polymerase II subunit A C-terminal domain phosphatase SSU72 OS=Rattus norvegicus GN=Ssu72 PE=2 SV=1	sp|Q4KLK9|SSU72_RAT	23 kDa	1	1.1
Copine-9 OS=Rattus norvegicus GN=Cpne9 PE=2 SV=1	sp|Q5BJS7|CPNE9_RAT	62 kDa	1	3.3
Store-operated calcium entry-associated regulatory factor OS=Rattus norvegicus GN=Tmem66 PE=2 SV=1	sp|Q6AYN2|SARAF_RAT	36 kDa	1	1
Proliferating cell nuclear antigen OS=Rattus norvegicus GN=Pcna PE=1 SV=1	sp|P04961|PCNA_RAT	29 kDa	1	1.3
Sister chromatid cohesion protein PDS5 homolog A OS=Rattus norvegicus GN=Pds5a PE=2 SV=1	sp|A4L9P7|PDS5A_RAT	150 kDa	1	17.2
Xaa-Pro aminopeptidase 1 OS=Rattus norvegicus GN=Xpnpep1 PE=1 SV=1	sp|O54975|XPP1_RAT	70 kDa	1	1.1
Inactive serine/threonine-protein kinase TEX14 OS=Rattus norvegicus GN=Tex14 PE=3 SV=2	sp|F1M5M3|TEX14_RAT	162 kDa	1	1.3
Vacuolar protein sorting-associated protein 33B OS=Rattus norvegicus GN=Vps33b PE=2 SV=1	sp|Q63616|VP33B_RAT	71 kDa	1	0.6
Replication factor C subunit 2 OS=Rattus norvegicus GN=Rfc2 PE=2 SV=1	sp|Q641W4|RFC2_RAT	39 kDa	1	2.4
A-kinase anchor protein 1, mitochondrial OS=Rattus norvegicus GN=Akap1 PE=2 SV=1	sp|O88884|AKAP1_RAT	92 kDa	1	1.8
UPF0585 protein C16orf13 homolog OS=Rattus norvegicus PE=2 SV=2	sp|Q497C3|CP013_RAT	23 kDa	1	0.9
Signal-induced proliferation-associated 1-like protein 1 OS=Rattus norvegicus GN=Sipa1l1 PE=1 SV=1	sp|O35412|SI1L1_RAT	202 kDa	1	0.8
Serine/threonine-protein kinase mTOR OS=Rattus norvegicus GN=Mtor PE=1 SV=1	sp|P42346|MTOR_RAT	289 kDa	1	1
14-3-3 protein eta OS=Rattus norvegicus GN=Ywhah PE=1 SV=2	sp|P68511|1433F_RAT	28 kDa	1	0.9
5'-AMP-activated protein kinase subunit beta-1 OS=Rattus norvegicus GN=Prkab1 PE=1 SV=4	sp|P80386|AAKB1_RAT	30 kDa	1	0.8
ELKS/Rab6-interacting/CAST family member 1 OS=Rattus norvegicus GN=Erc1 PE=1 SV=1	sp|Q811U3|RB6I2_RAT	109 kDa	1	1.1
Ubiquitin carboxyl-terminal hydrolase 19 OS=Rattus norvegicus GN=Usp19 PE=1 SV=1	sp|Q6J1Y9|UBP19_RAT	150 kDa	1	1.4
ATP-binding cassette sub-family F member 3 OS=Rattus norvegicus GN=Abcf3 PE=2 SV=1	sp|Q66H39|ABCF3_RAT	80 kDa	1	1.1
Dynamin-1-like protein OS=Rattus norvegicus GN=Dnm1l PE=1 SV=1	sp|O35303|DNM1L_RAT	84 kDa	1	1
Huntingtin OS=Rattus norvegicus GN=Htt PE=1 SV=1	sp|P51111|HD_RAT	344 kDa	1	1
Caspase-3 OS=Rattus norvegicus GN=Casp3 PE=2 SV=2	sp|P55213|CASP3_RAT	31 kDa	1	1
Adaptin ear-binding coat-associated protein 1 OS=Rattus norvegicus GN=Necap1 PE=1 SV=1	sp|P69682|NECP1_RAT	30 kDa	1	0.3
Sorting nexin-17 OS=Rattus norvegicus GN=Snx17 PE=1 SV=1	sp|Q6AYS6|SNX17_RAT	53 kDa	1	0.8
Alpha-1-acid glycoprotein OS=Rattus norvegicus GN=Orm1 PE=2 SV=1	sp|P02764|A1AG_RAT	24 kDa	1	0.7
40S ribosomal protein S4, X isoform OS=Rattus norvegicus GN=Rps4x PE=2 SV=2	sp|P62703|RS4X_RAT	30 kDa	1	1.1
DnaJ homolog subfamily C member 10 OS=Rattus norvegicus GN=Dnajc10 PE=2 SV=2	sp|Q498R3|DJC10_RAT	91 kDa	1	3.2
Microtubule-actin cross-linking factor 1 OS=Rattus norvegicus GN=Macf1 PE=1 SV=1	sp|D3ZHV2|MACF1_RAT	620 kDa	1	1.2
Flotillin-1 OS=Rattus norvegicus GN=Flot1 PE=2 SV=2	sp|Q9Z1E1|FLOT1_RAT	47 kDa	1	0.8
Translational activator of cytochrome c oxidase 1 OS=Rattus norvegicus GN=Taco1 PE=2 SV=1	sp|B2RYT9|TACO1_RAT	33 kDa	1	0.9
5'-nucleotidase OS=Rattus norvegicus GN=Nt5e PE=1 SV=1	sp|P21588|5NTD_RAT	64 kDa	1	0.7
CST complex subunit STN1 OS=Rattus norvegicus GN=Obfc1 PE=2 SV=1	sp|Q6AYD2|STN1_RAT	47 kDa	1	0.5
Cyclin-dependent kinase 12 OS=Rattus norvegicus GN=Cdk12 PE=1 SV=1	sp|Q3MJK5|CDK12_RAT	164 kDa	1	1
Zinc finger protein 574 OS=Rattus norvegicus GN=Znf574 PE=2 SV=1	sp|Q504L7|ZN574_RAT	99 kDa	1	18.5
Dynactin subunit 1 OS=Rattus norvegicus GN=Dctn1 PE=2 SV=2	sp|P28023|DCTN1_RAT	142 kDa	1	1.6
Tyrosine-protein phosphatase non-receptor type 2 OS=Rattus norvegicus GN=Ptpn2 PE=1 SV=2	sp|P35233|PTN2_RAT	48 kDa	1	0.4
Profilin-1 OS=Rattus norvegicus GN=Pfn1 PE=1 SV=2	sp|P62963|PROF1_RAT	15 kDa	1	1.1
Arf-GAP with GTPase, ANK repeat and PH domain-containing protein 2 OS=Rattus norvegicus GN=Agap2 PE=1 SV=1	sp|Q8CGU4|AGAP2_RAT	124 kDa	1	8.1
RNA/RNP complex-1-interacting phosphatase OS=Rattus norvegicus GN=Dusp11 PE=2 SV=1	sp|Q4KM79|DUS11_RAT	38 kDa	1	2.7
RNA-binding protein 47 OS=Rattus norvegicus GN=Rbm47 PE=2 SV=1	sp|Q66H68|RBM47_RAT	64 kDa	1	1.1
Leukocyte surface antigen CD47 OS=Rattus norvegicus GN=Cd47 PE=1 SV=1	sp|P97829|CD47_RAT	33 kDa	1	1.1
Thioredoxin, mitochondrial OS=Rattus norvegicus GN=Txn2 PE=2 SV=1	sp|P97615|THIOM_RAT	18 kDa	1	0.9
Tubulin gamma-1 chain OS=Rattus norvegicus GN=Tubg1 PE=2 SV=1	sp|P83888|TBG1_RAT	51 kDa	1	1.2
Thioredoxin OS=Rattus norvegicus GN=Txn PE=1 SV=2	sp|P11232|THIO_RAT	12 kDa	1	1
Protein midA homolog, mitochondrial OS=Rattus norvegicus PE=2 SV=1	sp|Q5XI79|MIDA_RAT	49 kDa	1	1.1
Flotillin-2 OS=Rattus norvegicus GN=Flot2 PE=1 SV=1	sp|Q9Z2S9|FLOT2_RAT	47 kDa	1	0.9
Ankyrin repeat and BTB/POZ domain-containing protein 1 OS=Rattus norvegicus GN=Abtb1 PE=2 SV=1	sp|Q5XIU1|ABTB1_RAT	54 kDa	1	1.4
GRIP and coiled-coil domain-containing protein 2 OS=Rattus norvegicus GN=Gcc2 PE=1 SV=1	sp|D3ZZL9|GCC2_RAT	195 kDa	1	1.3
N-alpha-acetyltransferase 11 OS=Rattus norvegicus GN=Naa11 PE=2 SV=1	sp|Q4V8K3|NAA11_RAT	28 kDa	1	3.5
Zinc finger FYVE domain-containing protein 26 OS=Rattus norvegicus GN=Zfyve26 PE=3 SV=1	sp|D4A8G9|ZFY26_RAT	284 kDa	1	0.5
Voltage-dependent anion-selective channel protein 3 OS=Rattus norvegicus GN=Vdac3 PE=1 SV=2	sp|Q9R1Z0|VDAC3_RAT	31 kDa	1	0.9
39S ribosomal protein L17, mitochondrial OS=Rattus norvegicus GN=Mrpl17 PE=2 SV=1	sp|Q6PDW6|RM17_RAT	20 kDa	1	12.3
Uncharacterized protein C4orf51 homolog OS=Rattus norvegicus PE=2 SV=1	sp|Q4V7B2|CD051_RAT	24 kDa	1	17.6
Protein FAM162A OS=Rattus norvegicus GN=Fam162a PE=2 SV=1	sp|Q4QQV3|F162A_RAT	18 kDa	1	0.8
Ras GTPase-activating protein 1 OS=Rattus norvegicus GN=Rasa1 PE=2 SV=1	sp|P50904|RASA1_RAT	115 kDa	1	11.7
Cluster of Myosin regulatory light chain 12B OS=Rattus norvegicus GN=Myl12b PE=1 SV=3 (sp|P18666|ML12B_RAT)	sp|P18666|ML12B_RAT [3]	20 kDa	1	0.8
Golgin subfamily A member 2 OS=Rattus norvegicus GN=Golga2 PE=1 SV=3	sp|Q62839|GOGA2_RAT	113 kDa	1	1.3
Ras-related protein R-Ras OS=Rattus norvegicus GN=Rras PE=1 SV=1	sp|D3Z8L7|RRAS_RAT	24 kDa	1	0.7
GRIP1-associated protein 1 OS=Rattus norvegicus GN=Gripap1 PE=1 SV=1	sp|Q9JHZ4|GRAP1_RAT	96 kDa	1	0.6
Protein timeless homolog OS=Rattus norvegicus GN=Timeless PE=1 SV=1	sp|Q9Z2Y1|TIM_RAT	139 kDa	1	7.7
Endophilin-A2 OS=Rattus norvegicus GN=Sh3gl1 PE=1 SV=1	sp|O35964|SH3G1_RAT	41 kDa	1	0.8
Immunoglobulin-binding protein 1 OS=Rattus norvegicus GN=Igbp1 PE=2 SV=2	sp|O08836|IGBP1_RAT	39 kDa	1	1
Palladin (Fragment) OS=Rattus norvegicus GN=Palld PE=2 SV=1	sp|P0C5E3|PALLD_RAT	67 kDa	1	0.8
Multidrug resistance-associated protein 5 OS=Rattus norvegicus GN=Abcc5 PE=2 SV=1	sp|Q9QYM0|MRP5_RAT	161 kDa	1	2.4
RNA-binding protein 42 OS=Rattus norvegicus GN=Rbm42 PE=1 SV=1	sp|Q6AXT7|RBM42_RAT	50 kDa	1	0.8
Translation initiation factor eIF-2B subunit gamma OS=Rattus norvegicus GN=Eif2b3 PE=2 SV=2	sp|P70541|EI2BG_RAT	50 kDa	1	3
Pleckstrin homology domain-containing family H member 3 OS=Rattus norvegicus GN=Plekhh3 PE=2 SV=1	sp|Q3B7L1|PKHH3_RAT	85 kDa	1	1.3
Protein disulfide-isomerase-like protein of the testis OS=Rattus norvegicus GN=Pdilt PE=1 SV=1	sp|Q5XI02|PDILT_RAT	68 kDa	1	2.1
Phosphatidylinositol 4-kinase type 2-beta OS=Rattus norvegicus GN=Pi4k2b PE=2 SV=1	sp|Q5XIL2|P4K2B_RAT	54 kDa	1	1.1
Golgi apparatus protein 1 OS=Rattus norvegicus GN=Glg1 PE=1 SV=1	sp|Q62638|GSLG1_RAT	134 kDa	1	0.7
Leucine zipper transcription factor-like protein 1 OS=Rattus norvegicus GN=Lztfl1 PE=2 SV=1	sp|Q562C6|LZTL1_RAT	35 kDa	1	1.6
Kalirin OS=Rattus norvegicus GN=Kalrn PE=1 SV=3	sp|P97924|KALRN_RAT	337 kDa	1	1.9
Thimet oligopeptidase OS=Rattus norvegicus GN=Thop1 PE=1 SV=4	sp|P24155|THOP1_RAT	78 kDa	1	1.9
ATP-binding cassette sub-family A member 2 OS=Rattus norvegicus GN=Abca2 PE=1 SV=1	sp|Q9ESR9|ABCA2_RAT	271 kDa	1	1
Centromere/kinetochore protein zw10 homolog OS=Rattus norvegicus GN=Zw10 PE=2 SV=3	sp|Q4V8C2|ZW10_RAT	88 kDa	1	1
Microtubule-associated protein 4 OS=Rattus norvegicus GN=Map4 PE=1 SV=1	sp|Q5M7W5|MAP4_RAT	110 kDa	1	1.1
Coronin-6 OS=Rattus norvegicus GN=Coro6 PE=2 SV=2	sp|Q920J3|CORO6_RAT	53 kDa	1	1.5
Translation initiation factor eIF-2B subunit epsilon OS=Rattus norvegicus GN=Eif2b5 PE=1 SV=2	sp|Q64350|EI2BE_RAT	80 kDa	1	0.7
CaiB/baiF CoA-transferase family protein C7orf10 homolog OS=Rattus norvegicus PE=2 SV=1	sp|Q68FU4|CG010_RAT	48 kDa	1	0.9
Translocon-associated protein subunit alpha OS=Rattus norvegicus GN=Ssr1 PE=2 SV=1	sp|Q7TPJ0|SSRA_RAT	36 kDa	1	0.7
Low molecular weight phosphotyrosine protein phosphatase OS=Rattus norvegicus GN=Acp1 PE=1 SV=3	sp|P41498|PPAC_RAT	18 kDa	1	1.4
Transcriptional adapter 3 OS=Rattus norvegicus GN=Tada3 PE=2 SV=1	sp|Q4V8F5|TADA3_RAT	49 kDa	1	1
Exocyst complex component 4 OS=Rattus norvegicus GN=Exoc4 PE=1 SV=1	sp|Q62824|EXOC4_RAT	111 kDa	1	1.7
Rho-associated protein kinase 2 OS=Rattus norvegicus GN=Rock2 PE=1 SV=2	sp|Q62868|ROCK2_RAT	160 kDa	1	1.1
Exocyst complex component 6 OS=Rattus norvegicus GN=Exoc6 PE=2 SV=2	sp|O54923|EXOC6_RAT	93 kDa	1	1.3
Calpastatin OS=Rattus norvegicus GN=Cast PE=1 SV=3	sp|P27321|ICAL_RAT	77 kDa	1	0.6
Serine/threonine-protein kinase N2 OS=Rattus norvegicus GN=Pkn2 PE=1 SV=2	sp|O08874|PKN2_RAT	112 kDa	1	0.9
Activin receptor type-2B OS=Rattus norvegicus GN=Acvr2b PE=1 SV=3	sp|P38445|AVR2B_RAT	58 kDa	1	0.2
Pyruvate kinase isozymes M1/M2 OS=Rattus norvegicus GN=Pkm PE=1 SV=3	sp|P11980|KPYM_RAT	58 kDa	1	0.8
60S ribosomal protein L22 OS=Rattus norvegicus GN=Rpl22 PE=2 SV=2	sp|P47198|RL22_RAT	15 kDa	1	0.8
Protein CutA OS=Rattus norvegicus GN=Cuta PE=1 SV=2	sp|Q6MGD0|CUTA_RAT	19 kDa	1	0.7
Flap endonuclease 1 OS=Rattus norvegicus GN=Fen1 PE=2 SV=1	sp|Q5XIP6|FEN1_RAT	43 kDa	1	0.8
Multidrug resistance protein 1 OS=Rattus norvegicus GN=Abcb1 PE=2 SV=1	sp|P43245|MDR1_RAT	141 kDa	1	1.6
Homeobox protein OTX1 OS=Rattus norvegicus GN=Otx1 PE=2 SV=1	sp|Q63410|OTX1_RAT	38 kDa	1	0.1
Zinc finger and BTB domain-containing protein 24 OS=Rattus norvegicus GN=Zbtb24 PE=2 SV=1	sp|Q3B725|ZBT24_RAT	78 kDa	1	0.6
RNA polymerase-associated protein LEO1 OS=Rattus norvegicus GN=Leo1 PE=2 SV=1	sp|Q641X2|LEO1_RAT	77 kDa	1	0.8
Patatin-like phospholipase domain-containing protein 7 OS=Rattus norvegicus GN=Pnpla7 PE=1 SV=2	sp|Q5BK26|PLPL7_RAT	150 kDa	1	0.7
Serine protease inhibitor A3L OS=Rattus norvegicus GN=Serpina3l PE=1 SV=3	sp|P05544|SPA3L_RAT	46 kDa	1	1.2
Syntaxin-binding protein 2 OS=Rattus norvegicus GN=Stxbp2 PE=2 SV=1	sp|Q62753|STXB2_RAT	67 kDa	1	2
Disks large homolog 4 OS=Rattus norvegicus GN=Dlg4 PE=1 SV=1	sp|P31016|DLG4_RAT	80 kDa	1	0.3
mRNA cap guanine-N7 methyltransferase OS=Rattus norvegicus GN=Rnmt PE=2 SV=1	sp|Q5U2U7|MCES_RAT	53 kDa	1	1.2
Growth arrest and DNA damage-inducible proteins-interacting protein 1 OS=Rattus norvegicus GN=Gadd45gip1 PE=2 SV=2	sp|Q5XJW2|G45IP_RAT	26 kDa	1	1.2
EH domain-containing protein 2 OS=Rattus norvegicus GN=Ehd2 PE=1 SV=1	sp|Q4V8H8|EHD2_RAT	61 kDa	1	0.5
Nucleoporin GLE1 OS=Rattus norvegicus GN=Gle1 PE=2 SV=1	sp|Q4KLN4|GLE1_RAT	79 kDa	1	0.5
Regulating synaptic membrane exocytosis protein 2 OS=Rattus norvegicus GN=Rims2 PE=1 SV=1	sp|Q9JIS1|RIMS2_RAT	176 kDa	1	1.2
Nuclear autoantigenic sperm protein OS=Rattus norvegicus GN=Nasp PE=2 SV=1	sp|Q66HD3|NASP_RAT	84 kDa	1	1.4
Emerin OS=Rattus norvegicus GN=Emd PE=2 SV=1	sp|Q63190|EMD_RAT	30 kDa	1	1.1
Phosphatidylinositol 4-kinase type 2-alpha OS=Rattus norvegicus GN=Pi4k2a PE=1 SV=1	sp|Q99M64|P4K2A_RAT	54 kDa	1	1.1
BAG family molecular chaperone regulator 5 OS=Rattus norvegicus GN=Bag5 PE=1 SV=1	sp|Q5QJC9|BAG5_RAT	51 kDa	1	0.7
Testis- and ovary-specific PAZ domain-containing protein 1 OS=Rattus norvegicus GN=Topaz1 PE=3 SV=1	sp|D3ZUC6|TOPZ1_RAT	189 kDa	1	1
Aurora kinase B OS=Rattus norvegicus GN=Aurkb PE=1 SV=1	sp|O55099|AURKB_RAT	39 kDa	1	0.9
WD repeat-containing protein 18 OS=Rattus norvegicus GN=Wdr18 PE=2 SV=1	sp|Q499N3|WDR18_RAT	47 kDa	1	0.1
Alpha-adducin OS=Rattus norvegicus GN=Add1 PE=1 SV=2	sp|Q63028|ADDA_RAT	80 kDa	1	1.1
Cluster of Vesicle-associated membrane protein 2 OS=Rattus norvegicus GN=Vamp2 PE=1 SV=2 (sp|P63045|VAMP2_RAT)	sp|P63045|VAMP2_RAT [2]	13 kDa	1	0.9
SWI/SNF-related matrix-associated actin-dependent regulator of chromatin subfamily E member 1 OS=Rattus norvegicus GN=Smarce1 PE=1 SV=1	Q56A18	?	1	0.7
Calcium-transporting ATPase type 2C member 1 OS=Rattus norvegicus GN=Atp2c1 PE=2 SV=1	sp|Q64566|AT2C1_RAT	101 kDa	1	0.1
Protein phosphatase 1 regulatory subunit 14A OS=Rattus norvegicus GN=Ppp1r14a PE=2 SV=1	sp|Q99MC0|PP14A_RAT	17 kDa	1	0.3
Interferon-induced GTP-binding protein Mx1 OS=Rattus norvegicus GN=Mx1 PE=1 SV=1	sp|P18588|MX1_RAT	74 kDa	1	0.6
Phosphorylase b kinase gamma catalytic chain, testis/liver isoform OS=Rattus norvegicus GN=Phkg2 PE=1 SV=1	sp|P31325|PHKG2_RAT	47 kDa	1	0.9
Plasma protease C1 inhibitor OS=Rattus norvegicus GN=Serping1 PE=2 SV=1	sp|Q6P734|IC1_RAT	56 kDa	1	0.8
Cluster of Putative 60S ribosomal protein L37a OS=Rattus norvegicus GN=Rpl37a-ps1 PE=5 SV=2 (sp|P61515|RL37P_RAT)	sp|P61515|RL37P_RAT [2]	10 kDa	1	0.9
Activating signal cointegrator 1 complex subunit 3 OS=Rattus norvegicus GN=Ascc3 PE=3 SV=1	sp|F1LPQ2|ASCC3_RAT	250 kDa	1	1.1
Mannose-binding protein C OS=Rattus norvegicus GN=Mbl2 PE=1 SV=2	sp|P08661|MBL2_RAT	26 kDa	1	0.9
Transmembrane protein 126A OS=Rattus norvegicus GN=Tmem126a PE=2 SV=1	sp|Q5HZA9|T126A_RAT	22 kDa	1	1.2
Striated muscle-specific serine/threonine-protein kinase OS=Rattus norvegicus GN=Speg PE=2 SV=2	sp|Q63638|SPEG_RAT	354 kDa	1	0.9
Translation initiation factor eIF-2B subunit alpha OS=Rattus norvegicus GN=Eif2b1 PE=2 SV=1	sp|Q64270|EI2BA_RAT	34 kDa	1	1.3
Caveolin-1 OS=Rattus norvegicus GN=Cav1 PE=1 SV=3	sp|P41350|CAV1_RAT	21 kDa	1	1
Dystrophin-related protein 2 OS=Rattus norvegicus GN=Drp2 PE=1 SV=1	sp|Q9EPA0|DRP2_RAT	108 kDa	1	1.1
Arf-GAP with SH3 domain, ANK repeat and PH domain-containing protein 1 OS=Rattus norvegicus GN=Asap1 PE=2 SV=2	sp|Q1AAU6|ASAP1_RAT	127 kDa	1	1
Nucleolar transcription factor 1 OS=Rattus norvegicus GN=Ubtf PE=1 SV=1	sp|P25977|UBF1_RAT	89 kDa	1	0.6
Leucine-rich repeat-containing protein 8D OS=Rattus norvegicus GN=Lrrc8d PE=2 SV=1	sp|Q5U308|LRC8D_RAT	98 kDa	1	1
Prolyl 4-hydroxylase subunit alpha-3 OS=Rattus norvegicus GN=P4ha3 PE=2 SV=1	sp|Q6W3E9|P4HA3_RAT	61 kDa	1	0.9
Brain acid soluble protein 1 OS=Rattus norvegicus GN=Basp1 PE=1 SV=2	sp|Q05175|BASP1_RAT	22 kDa	1	0.9
Tyrosine-protein phosphatase non-receptor type 7 OS=Rattus norvegicus GN=Ptpn7 PE=2 SV=1	sp|P49445|PTN7_RAT	40 kDa	1	0.9
Muskelin OS=Rattus norvegicus GN=Mkln1 PE=1 SV=1	sp|Q99PV3|MKLN1_RAT	85 kDa	1	1
Heterogeneous nuclear ribonucleoprotein H OS=Rattus norvegicus GN=Hnrnph1 PE=1 SV=2	sp|Q8VHV7|HNRH1_RAT	49 kDa	1	1.4
Cluster of RT1 class I histocompatibility antigen, AA alpha chain OS=Rattus norvegicus PE=1 SV=2 (sp|P16391|HA12_RAT)	sp|P16391|HA12_RAT [2]	42 kDa	1	1.1
Inositol 1,4,5-trisphosphate receptor type 1 OS=Rattus norvegicus GN=Itpr1 PE=1 SV=2	sp|P29994|ITPR1_RAT	313 kDa	1	0.9
Cluster of KH domain-containing, RNA-binding, signal transduction-associated protein 1 OS=Rattus norvegicus GN=Khdrbs1 PE=1 SV=1 (sp|Q91V33|KHDR1_RAT)	sp|Q91V33|KHDR1_RAT [2]	48 kDa	1	1.7
Cluster of Plasma membrane calcium-transporting ATPase 4 OS=Rattus norvegicus GN=Atp2b4 PE=2 SV=1 (sp|Q64542|AT2B4_RAT)	sp|Q64542|AT2B4_RAT [3]	133 kDa	1	0.8
Kinesin-like protein KIF1C OS=Rattus norvegicus GN=Kif1c PE=1 SV=1	sp|O35787|KIF1C_RAT	122 kDa	1	1
Nuclear pore complex protein Nup107 OS=Rattus norvegicus GN=Nup107 PE=1 SV=1	sp|P52590|NU107_RAT	107 kDa	1	1
Cluster of Phosphoribosyl pyrophosphate synthase-associated protein 2 OS=Rattus norvegicus GN=Prpsap2 PE=2 SV=1 (sp|O08618|KPRB_RAT)	sp|O08618|KPRB_RAT [2]	41 kDa	1	1.5
Cluster of Importin subunit alpha-6 OS=Rattus norvegicus GN=Kpna5 PE=2 SV=1 (sp|Q56R16|IMA5_RAT)	sp|Q56R16|IMA5_RAT [2]	60 kDa	1	0.9
Kinesin-like protein KIF27 OS=Rattus norvegicus GN=Kif27 PE=2 SV=1	sp|Q7M6Z5|KIF27_RAT	159 kDa	1	0.8
Etoposide-induced protein 2.4 homolog OS=Rattus norvegicus GN=Ei24 PE=2 SV=1	sp|Q4KM77|EI24_RAT	39 kDa	1	1.3
Cluster of Calcium/calmodulin-dependent protein kinase type II subunit delta OS=Rattus norvegicus GN=Camk2d PE=1 SV=1 (sp|P15791|KCC2D_RAT)	sp|P15791|KCC2D_RAT [4]	60 kDa	1	1
Zinc fingers and homeoboxes protein 3 OS=Rattus norvegicus GN=Zhx3 PE=1 SV=2	sp|Q80Z36|ZHX3_RAT	104 kDa	1	1.5
Collagen alpha-1(XXVII) chain OS=Rattus norvegicus GN=Col27a1 PE=2 SV=1	sp|Q80ZF0|CORA1_RAT	188 kDa	1	1
Iron-responsive element-binding protein 2 OS=Rattus norvegicus GN=Ireb2 PE=1 SV=2	sp|Q62751|IREB2_RAT	105 kDa	1	1.2
Cluster of RAC-gamma serine/threonine-protein kinase OS=Rattus norvegicus GN=Akt3 PE=2 SV=2 (sp|Q63484|AKT3_RAT)	sp|Q63484|AKT3_RAT [3]	56 kDa	1	0.8
Translocase of inner mitochondrial membrane domain-containing protein 1 OS=Rattus norvegicus GN=Timmdc1 PE=2 SV=1	sp|Q6AY94|TIDC1_RAT	32 kDa	1	0.9
Cytochrome P450 2A3 OS=Rattus norvegicus GN=Cyp2a3 PE=2 SV=1	sp|P20812|CP2A3_RAT	57 kDa	1	4.1
Myosin phosphatase Rho-interacting protein OS=Rattus norvegicus GN=Mprip PE=1 SV=1	sp|Q9ERE6|MPRIP_RAT	117 kDa	1	1.5
Angiotensinogen OS=Rattus norvegicus GN=Agt PE=1 SV=1	sp|P01015|ANGT_RAT	52 kDa	1	1
Unconventional myosin-X OS=Rattus norvegicus GN=Myo10 PE=1 SV=1	sp|D3ZJP6|MYO10_RAT	237 kDa	1	0.7
Sperm-associated antigen 1 OS=Rattus norvegicus GN=Spag1 PE=2 SV=1	sp|Q5U2X2|SPAG1_RAT	101 kDa	1	2.5
ATP synthase subunit f, mitochondrial OS=Rattus norvegicus GN=Atp5j2 PE=1 SV=1	sp|D3ZAF6|ATPK_RAT	10 kDa	1	1
Rho GTPase-activating protein 17 OS=Rattus norvegicus GN=Arhgap17 PE=1 SV=1	sp|Q99N37|RHG17_RAT	94 kDa	1	1.4
Neurofilament heavy polypeptide OS=Rattus norvegicus GN=Nefh PE=1 SV=4	sp|P16884|NFH_RAT	115 kDa	1	1.4
DNA helicase MCM8 OS=Rattus norvegicus GN=Mcm8 PE=3 SV=1	sp|D3ZVK1|MCM8_RAT	92 kDa	1	1.1
Keratin, type II cytoskeletal 6A OS=Rattus norvegicus GN=Krt6a PE=1 SV=1	sp|Q4FZU2|K2C6A_RAT	59 kDa	1	1
Solute carrier family 22 member 7 OS=Rattus norvegicus GN=Slc22a7 PE=1 SV=1	sp|Q5RLM2|S22A7_RAT	59 kDa	1	1
Aminoacyl tRNA synthase complex-interacting multifunctional protein 2 OS=Rattus norvegicus GN=Aimp2 PE=2 SV=1	sp|Q32PX2|AIMP2_RAT	35 kDa	1	1.8
Pleckstrin homology-like domain family B member 1 (Fragment) OS=Rattus norvegicus GN=Phldb1 PE=2 SV=2	sp|Q63312|PHLB1_RAT	94 kDa	1	1.3
[truncated: 184 more rows]
